# Supplementary material for: Catalytic enantioselective synthesis of 2-pyrazolines via one-pot condensation/6π-electrocyclization: 3,5-bis(pentafluorosulfanyl)-phenylthioureas as powerful hydrogen bond donors
Source: Royal Society of Chemistry journal article supplement (doi:10.1039/d4sc04760e), 2024-01-01

## Catalytic Enantioselective Synthesis of 2-Pyrazolines via One-Pot Condensation/ $6\pi$ -Electrocyclization: 3,5-Bis(Pentafluorosulfanyl)phenylthioureas as Powerful Hydrogen Bond Donors

Moises A. Romero Reyes,<sup>1</sup> Subhradeep Dutta,<sup>1</sup> Minami Odagi,<sup>1</sup> Chang Min,<sup>2</sup> and Daniel Seidel<sup>1,\*</sup>

<sup>1</sup> Center for Heterocyclic Compounds, Department of Chemistry, University of Florida, Gainesville, Florida 32611, United States.

<sup>2</sup> Department of Chemistry and Chemical Biology, Rutgers, The State University of New Jersey, Piscataway, New Jersey 08854, United States

\* Correspondence to: [seidel@chem.ufl.edu](mailto:seidel@chem.ufl.edu)

### Supporting Information

#### Table of Contents

|                                                                                                      |      |
|------------------------------------------------------------------------------------------------------|------|
| General Information .....                                                                            | S-2  |
| General Procedure A for the Preparation of Isothiocyanates .....                                     | S-3  |
| Characterization Data for Isothiocyanates .....                                                      | S-4  |
| General Procedure B for the Preparation of Aminoalcohol-Derived Thioureas .....                      | S-8  |
| Characterization Data for Aminoalcohol-Derived Thioureas .....                                       | S-9  |
| General Procedure C for the Preparation of CBSCA Catalysts .....                                     | S-15 |
| Characterization Data for CBSCA Catalysts .....                                                      | S-16 |
| Synthesis and Characterization of Takemoto-Type Catalyst .....                                       | S-22 |
| General Procedure D for the Catalytic Enantioselective Synthesis of 2-Pyrazolines .....              | S-23 |
| Characterization Data for Products .....                                                             | S-24 |
| Enantioselective Michael Addition of Dimethyl Malonate to <i>trans</i> - $\beta$ -Nitrostyrene ..... | S-44 |
| References .....                                                                                     | S-45 |
| SFC Profiles .....                                                                                   | S-46 |
| NMR Spectra .....                                                                                    | S-67 |

**General Information:** Reagents were purchased from commercial sources and were purified by distillation or recrystallization prior to use. Toluene was dried using a JC Meyer solvent purification system. Purification of reaction products was carried out by flash column chromatography using Sorbent Technologies Standard Grade silica gel (60 Å, 230–400 mesh). Analytical thin layer chromatography was performed on EM Reagent 0.25 mm silica gel 60 F254 plates. Visualization was accomplished with UV light and Dragendorff-Munier stains, followed by heating. Proton nuclear magnetic resonance spectra ( $^1\text{H-NMR}$ ) were recorded on Bruker 400 MHz and 600 MHz instruments, and chemical shifts are reported in ppm using the solvent as an internal standard ( $\text{CDCl}_3$  at 7.26 ppm,  $(\text{CD}_3)_2\text{SO}$  at 2.50 ppm). Data are reported as app = apparent, s = singlet, d = doublet, t = triplet, q = quartet, m = multiplet, comp = complex, br = broad; coupling constant(s) in Hz. Proton-decoupled carbon nuclear magnetic resonance spectra ( $^{13}\text{C-NMR}$ ) were recorded on Bruker 400 MHz and 600 MHz instruments and chemical shifts are reported in ppm using the solvent as an internal standard ( $\text{CDCl}_3$  at 77.0 ppm,  $(\text{CD}_3)_2\text{SO}$  at 39.52 ppm). High resolution mass spectra (HRMS) were obtained from an Agilent 6230 ESI-TOF instrument. Supercritical fluid chromatography (SFC) analysis was carried out on an Agilent 1260 Infinity II series instrument with auto sampler and multiple wavelength detectors. Optical rotations were measured using a 1 mL cell with a 1 dm path length on a Jasco P-2000 polarimeter at 589 nm and at 20 °C.  $\alpha,\beta$ -Unsaturated ketones were prepared according to established procedures.<sup>1</sup> 3,5-Bis(pentafluoro- $\lambda^6$ -sulfanyl)aniline was prepared according to a literature report.<sup>2</sup>

### General Procedure A for the Preparation of Isothiocyanates

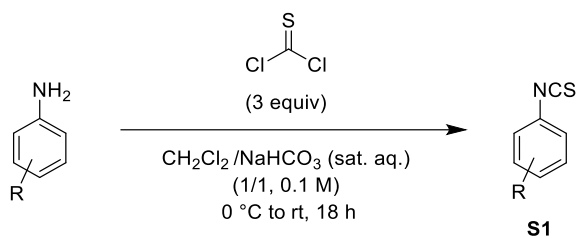

To an ice cooled solution of the corresponding aniline (1 mmol, 1 equiv) in a mixture of saturated aqueous NaHCO<sub>3</sub> and CH<sub>2</sub>Cl<sub>2</sub> (1:1, 5 mL/5 mL) was added thiophosgene (3 mmol, 3 equiv) under stirring. The resulting mixture was then allowed to warm to room temperature and stirred until the aniline was consumed as indicated by TLC (18 h). The layers were then separated, and the aqueous layer was extracted with CH<sub>2</sub>Cl<sub>2</sub> (3 × 10 mL). The combined organic layers were then dried over anhydrous Na<sub>2</sub>SO<sub>4</sub>, concentrated, and the residue purified by silica gel chromatography (using 2% EtOAc in hexanes as eluent).

**(5-Isothiocyanato-1,3-phenylene)bis(pentafluoro- $\lambda^6$ -sulfane)**

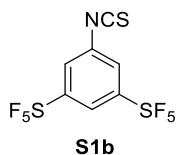

To an ice cooled solution of 3,5-bis(pentafluoro- $\lambda^6$ -sulfanyl)aniline (690 mg, 2 mmol) in a mixture of saturated aqueous  $\text{NaHCO}_3$  and  $\text{CH}_2\text{Cl}_2$  (1:1, 10 mL/10 mL) was added thiophosgene (0.46 mL, 6 mmol, 3 equiv) under stirring. The resulting mixture was then allowed to warm to room temperature and stirred for 18 h, then transferred to a separatory funnel. The layers were then separated and the aqueous layer was extracted with  $\text{CH}_2\text{Cl}_2$  ( $3 \times 20$  mL). The combined organic layers were then dried over anhydrous  $\text{Na}_2\text{SO}_4$ , concentrated, and the residue purified by silica gel chromatography (using 2% EtOAc in hexanes as eluent) to provide **S1b** as a beige solid in 94% yield (728 mg).

**Characterization data for S1b:**

**R<sub>f</sub>** = 0.70 in hexanes/EtOAc 95:5 v/v.

**mp** = 102–104 °C.

**<sup>1</sup>H NMR** (600 MHz,  $\text{CDCl}_3$ ):  $\delta$  = 8.03–7.99 (m, 1H), 7.74 (d,  $J$  = 1.86 Hz, 2H).

**<sup>13</sup>C NMR** (150 MHz,  $\text{CDCl}_3$ ):  $\delta$  = 154.2 (p,  $J_{\text{C-F}}$  = 20.6 Hz), 141.7, 133.7, 126.5–126.2 (m), 122.2.

**<sup>19</sup>F-NMR** (377 MHz,  $\text{CDCl}_3$ ):  $\delta$  = 80.25 (p,  $J_{\text{F-F}}$  = 151.1 Hz, 2F), 63.01 (d,  $J_{\text{F-F}}$  = 151.3 Hz, 8F).



### Pentafluoro(4-isothiocyanatophenyl)- $\lambda^6$ -sulfane

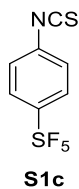

Following general procedure A, compound **S1c** was obtained from 4-(pentafluoro- $\lambda^6$ -sulfanyl)aniline (219 mg, 1 mmol, 1 equiv) and thiophosgene (0.23 mL, 3 mmol, 3 equiv) as a beige solid in 93% yield (243 mg).

#### Characterization data for **S1c**:

**R<sub>f</sub>** = 0.75 in hexanes/EtOAc 95:5 v/v.

**mp** = 82–84 °C.

**<sup>1</sup>H NMR** (600 MHz, CDCl<sub>3</sub>):  $\delta$  = 7.77–7.73 (m, 2H), 7.28 (d,  $J$  = 8.7 Hz, 2H).

**<sup>13</sup>C NMR** (150 MHz, CDCl<sub>3</sub>):  $\delta$  = 151.7 (p,  $J_{C-F}$  = 18.5 Hz), 139.1, 134.8, 127.6 (p,  $J$  = 4.5 Hz), 125.7.

**<sup>19</sup>F-NMR** (565 MHz, CDCl<sub>3</sub>):  $\delta$  = 83.40 (p,  $J_{F-F}$  = 150.6 Hz, 1F), 63.07 (d,  $J_{F-F}$  = 150.4 Hz, 4F).

### Pentafluoro(3-isothiocyanatophenyl)- $\lambda^6$ -sulfane

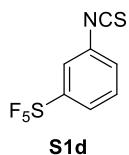

Following general procedure A, compound **S1d** was obtained from 3-(pentafluoro- $\lambda^6$ -sulfanyl)aniline (219 mg, 1 mmol, 1 equiv) and thiophosgene (0.23 mL, 3 mmol, 3 equiv) as a beige solid in 97% yield (253 mg).

#### Characterization data for **S1d**:

**R<sub>f</sub>** = 0.72 in hexanes/EtOAc 95:5 v/v.

**mp** = 88–90 °C.

**<sup>1</sup>H NMR** (600 MHz, CDCl<sub>3</sub>):  $\delta$  = 7.68–7.64 (m, 1H), 7.60 (app t,  $J$  = 1.9 Hz 1H), 7.47 (app t,  $J$  = 8.2 Hz, 1H), 7.37 (app d,  $J$  = 7.9 Hz, 1H).

**<sup>13</sup>C NMR** (150 MHz, CDCl<sub>3</sub>):  $\delta$  = 154.4 (p,  $J_{C-F}$  = 18.1 Hz), 138.7, 132.4, 129.8, 128.6, 124.5 (p,  $J_{C-F}$  = 4.7 Hz), 123.5 (p,  $J_{C-F}$  = 4.8 Hz).

**<sup>19</sup>F-NMR** (565 MHz, CDCl<sub>3</sub>):  $\delta$  = 82.60 (p,  $J_{F-F}$  = 150.5 Hz, 1F), 62.68 (d,  $J_{F-F}$  = 150.6 Hz, 4F).

### 1-Isothiocyanato-4-((trifluoromethyl)sulfonyl)benzene

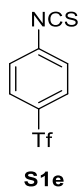

Following general procedure A, compound **S1e** was obtained from 4-((trifluoromethyl)sulfonyl)aniline (225 mg, 1 mmol, 1 equiv) and thiophosgene (0.23 mL, 3 mmol, 3 equiv) as a beige solid in 94% yield (251 mg).

#### Characterization data for **S1e**:

**R<sub>f</sub>** = 0.70 in hexanes/EtOAc 95:5 v/v.

**mp** = 71–73 °C.

**<sup>1</sup>H NMR** (600 MHz, CDCl<sub>3</sub>): δ = 8.03 (d, *J* = 8.7 Hz, 2H), 7.50–7.43 (m, 2H).

**<sup>13</sup>C NMR** (150 MHz, CDCl<sub>3</sub>): δ = 141.5, 140.2, 132.5, 129.0, 126.9, 119.67 (q, *J*<sub>C-F</sub> = 325.6 Hz).

**<sup>19</sup>F-NMR** (565 MHz, CDCl<sub>3</sub>): δ = –78.20.

### General Procedure B for the Preparation of Aminoalcohol-Derived Thioureas

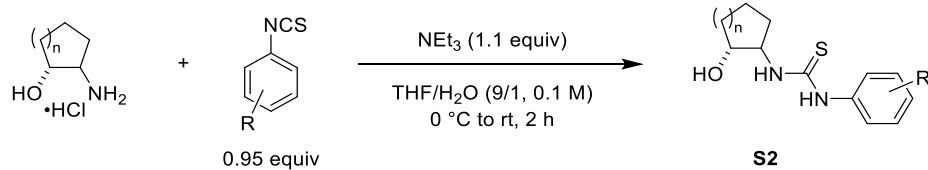

To an ice cooled solution of the amino alcohol hydrochloride in THF/ $\text{H}_2\text{O}$  (9:1, 0.1 M) was added triethylamine (1.1 equiv), followed by isothiocyanate (0.95 equiv). The resulting mixture was then allowed to warm to room temperature and stirred for 2 h, then transferred to a separatory funnel. EtOAc (20 mL) was added, and the mixture washed with 1 M HCl (20 mL x 2). The combined aqueous layers were extracted with EtOAc (20 mL x 2), and the combined organic layers washed with brine (20 mL) and dried over anhydrous  $\text{Na}_2\text{SO}_4$ . Solvent was then removed under reduced pressure and the residue purified by silica gel chromatography (using 30% EtOAc in hexanes as eluent).

**1-(3,5-Bis(pentafluoro- $\lambda^6$ -sulfanyl)phenyl)-3-((1*R*,2*R*)-2-hydroxycyclopentyl)thiourea**

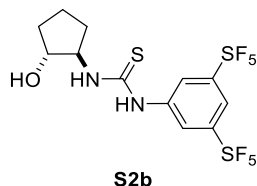

To an ice cooled solution of (1*R*, 2*R*)-2-aminocyclopentan-1-ol hydrochloride (248 mg, 1.8 mmol) in THF/H<sub>2</sub>O (9:1, 16.5 mL/1.5 mL) was added triethylamine (0.28 mL, 1.98 mmol, 1.1 equiv), followed by isothiocyanate **S1b** (662 mg, 1.71 mmol, 0.95 equiv). The resulting mixture was then allowed to warm to room temperature and stirred for 2 h, then transferred to a separatory funnel. EtOAc (50 mL) was added, and the mixture washed with 1 M HCl (50 mL x 2). The combined aqueous layers were extracted with EtOAc (50 mL x 2), and the combined organic layers washed with brine (50 mL) and dried over anhydrous Na<sub>2</sub>SO<sub>4</sub>. Solvent was then removed under reduced pressure and the residue purified by silica gel chromatography (using 30% EtOAc in hexanes as eluent) to provide **S2b** as a white solid in 95% yield (793 mg).

**Characterization data for S2b:**

**R<sub>f</sub>** = 0.20 in hexanes/EtOAc 50:50 v/v.

**mp** = 117–119 °C.

**[ $\alpha$ ]<sub>D</sub><sup>20</sup>** = +26.13 (c 0.5, CHCl<sub>3</sub>).

**<sup>1</sup>H NMR** (500 MHz, (CD<sub>3</sub>)<sub>2</sub>SO):  $\delta$  = 9.98 (s, 1H), 8.44 (s, 2H), 8.31 (s, 1H), 7.94 (s, 1H), 4.83 (br s, 1H), 4.40–4.20 (m, 1H), 4.04–3.92 (m, 1H), 2.20–1.98 (m, 1H), 1.95–1.76 (m, 1H), 1.75–1.55 (comp, 2H), 1.55–1.31 (comp, 2H).

**<sup>13</sup>C NMR** (100 MHz, (CD<sub>3</sub>)<sub>2</sub>SO):  $\delta$  = 180.2, 152.3–151.4 (m), 142.0, 122.4, 116.8, 75.6, 62.3, 32.2, 29.1, 20.3.

**<sup>19</sup>F-NMR** (565 MHz, (CD<sub>3</sub>)<sub>2</sub>SO):  $\delta$  = 89.12 (p,  $J_{F-F}$  = 151.9 Hz, 2F), 68.60 (d,  $J_{F-F}$  = 151.9 Hz, 8F).

**HRMS (ESI-TOF)**: Calculated for C<sub>12</sub>H<sub>15</sub>F<sub>10</sub>N<sub>2</sub>OS<sub>3</sub> [M + H]<sup>+</sup>: 489.0181, found 489.0183.

**1-(3,5-Bis(pentafluoro- $\lambda^6$ -sulfanyl)phenyl)-3-((1*R*,2*R*)-2-hydroxycyclohexyl)thiourea**

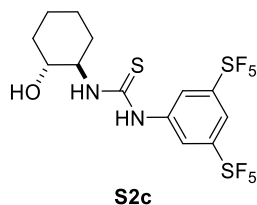

Following general procedure B, compound **S2c** was obtained from (1*R*, 2*R*)-2-aminocyclohexan-1-ol hydrochloride (76 mg, 0.5 mmol, 1 equiv) and isothiocyanate **S1b** (184 mg, 0.475 mmol, 0.95 equiv) as a white solid in 93% yield (222 mg).

**Characterization data for S2c:**

**R<sub>f</sub>** = 0.24 in hexanes/EtOAc 50:50 v/v.

**mp** = 139–141 °C.

**[ $\alpha$ ]<sub>D</sub><sup>20</sup>** = +86.67 (c 0.5, CHCl<sub>3</sub>).

**<sup>1</sup>H NMR** (400 MHz, (CD<sub>3</sub>)<sub>2</sub>SO):  $\delta$  = 10.03 (s, 1H), 8.45–8.40 (m, 2H), 8.29 (s, 1H), 7.93 (s, 1H), 4.70 (br s, 1H), 4.08–3.82 (m, 1H), 3.43–3.35 (m, 1H), 2.18–2.01 (m, 1H), 1.94–1.87 (m, 1H), 1.67–1.57 (comp, 2H), 1.34–1.09 (comp, 4H).

**<sup>13</sup>C NMR** (100 MHz, (CD<sub>3</sub>)<sub>2</sub>SO):  $\delta$  = 179.7, 152.3–151.6 (m), 142.0, 122.2, 116.6, 70.8, 59.4, 34.3, 29.9, 24.0, 23.7.

**<sup>19</sup>F-NMR** (377 MHz, (CD<sub>3</sub>)<sub>2</sub>SO):  $\delta$  = 84.48 (p,  $J_{F-F}$  = 152.3 Hz, 2F), 63.92 (d,  $J_{F-F}$  = 152.2 Hz, 8F).

**HRMS (ESI-TOF)**: Calculated for C<sub>13</sub>H<sub>17</sub>F<sub>10</sub>N<sub>2</sub>OS<sub>3</sub> [M + H]<sup>+</sup>: 503.0338, found 503.0354.

**1-((1*R*,2*R*)-2-Hydroxycyclohexyl)-3-(4-(pentafluoro- $\lambda^6$ -sulfanyl)phenyl)thiourea**

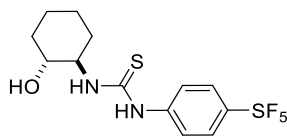

**S2d**

Following general procedure B, compound **S2d** was obtained from (1*R*, 2*R*)-2-aminocyclohexan-1-ol hydrochloride (121 mg, 0.8 mmol, 1 equiv) and isothiocyanate **S1c** (198 mg, 0.76 mmol, 0.95 equiv) as a white solid in 95% yield (272 mg).

**Characterization data for S2d:**

**R<sub>f</sub>** = 0.31 in hexanes/EtOAc 50:50 v/v.

**mp** = 125–127 °C.

**[ $\alpha$ ]<sub>D</sub><sup>20</sup>** = +59.76 (c 0.5, CHCl<sub>3</sub>).

**<sup>1</sup>H NMR** (600 MHz, (CD<sub>3</sub>)<sub>2</sub>SO):  $\delta$  = 9.83 (s, 1H), 8.03 (s, 1H), 7.86–7.68 (comp, 4H), 4.75 (br s, 1H), 4.10–3.78 (m, 1H), 3.44–3.35 (m, 1H), 2.24–2.04 (m, 1H), 1.95–1.83 (m, 1H), 1.68–1.55 (comp, 2H), 1.35–1.00 (comp, 4H).

**<sup>13</sup>C NMR** (150 MHz, (CD<sub>3</sub>)<sub>2</sub>SO):  $\delta$  = 179.6, 147.2–146.5 (m), 143.3, 126.3, 120.7, 70.8, 59.3, 34.3, 30.0, 23.9, 23.7.

**<sup>19</sup>F-NMR** (565 MHz, (CD<sub>3</sub>)<sub>2</sub>SO):  $\delta$  = 88.90 (p,  $J_{F-F}$  = 150.6 Hz, 1F), 65.03 (d,  $J_{F-F}$  = 150.4 Hz, 4F).

**HRMS (ESI-TOF)**: Calculated for C<sub>13</sub>H<sub>18</sub>F<sub>5</sub>N<sub>2</sub>OS<sub>2</sub> [M + H]<sup>+</sup>: 377.0775, found 377.0789.

**1-((1*R*,2*R*)-2-Hydroxycyclohexyl)-3-(3-(pentafluoro- $\lambda^6$ -sulfanyl)phenyl)thiourea**

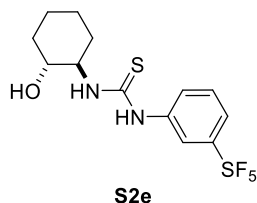

Following general procedure B, compound **S2e** was obtained from (1*R*, 2*R*)-2-aminocyclohexan-1-ol hydrochloride (61 mg, 0.4 mmol, 1 equiv) and isothiocyanate **S1d** (99 mg, 0.38 mmol, 0.95 equiv) as a white solid in 92% yield (132 mg).

**Characterization data for S2e:**

**R<sub>f</sub>** = 0.23 in hexanes/EtOAc 50:50 v/v.

**mp** = 149–151 °C.

**[ $\alpha$ ]<sub>D</sub><sup>20</sup>** = +52.37 (c 0.5, CHCl<sub>3</sub>).

**<sup>1</sup>H NMR** (400 MHz, (CD<sub>3</sub>)<sub>2</sub>SO):  $\delta$  = 9.73 (s, 1H), 8.28 (s, 1H), 7.95 (s, 1H), 7.70–7.60 (m, 1H), 7.59–7.46 (comp, 2H), 4.72 (br s, 1H), 4.06–3.81 (m, 1H), 3.44–3.34 (m, 1H), 2.17–2.04 (m, 1H), 1.94–1.83 (m, 1H), 1.70–1.52 (comp, 2H), 1.35–1.02 (comp, 4H).

**<sup>13</sup>C NMR** (100 MHz, (CD<sub>3</sub>)<sub>2</sub>SO):  $\delta$  = 179.9, 152.7–152.2 (m), 140.8, 129.2, 125.5, 120.2, 118.9, 70.9, 59.1, 34.3, 30.1, 24.0, 23.7.

**<sup>19</sup>F-NMR** (565 MHz, (CD<sub>3</sub>)<sub>2</sub>SO):  $\delta$  = 87.53 (p,  $J_{F-F}$  = 150.6 Hz, 1F), 63.73 (d,  $J_{F-F}$  = 150.6 Hz, 4F).

**HRMS (ESI-TOF)**: Calculated for C<sub>13</sub>H<sub>18</sub>F<sub>5</sub>N<sub>2</sub>OS<sub>2</sub> [M + H]<sup>+</sup>: 377.0775, found 377.0791.



**1-((1*R*,2*R*)-2-Hydroxycyclohexyl)-3-(4-((trifluoromethyl)sulfonyl)phenyl)thiourea**

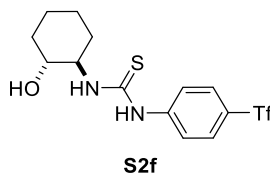

Following general procedure B, compound **S2f** was obtained from (1*R*, 2*R*)-2-aminocyclohexan-1-ol hydrochloride (121 mg, 0.8 mmol, 1 equiv) and isothiocyanate **S1e** (203 mg, 0.76 mmol, 0.95 equiv) as a white solid in 95% yield (276 mg).

**Characterization data for S2f:**

**R<sub>f</sub>** = 0.34 in hexanes/EtOAc 50:50 v/v.

**mp** = 101–103 °C.

**[α]<sub>D</sub><sup>20</sup>** = +98.87 (c 0.5, CHCl<sub>3</sub>).

**<sup>1</sup>H NMR** (400 MHz, (CD<sub>3</sub>)<sub>2</sub>SO): δ = 10.19 (s, 1H), 8.43 (s, 1H), 8.10–7.85 (comp, 4H), 4.80 (s, 1H), 4.05–3.85 (m, 1H), 3.48–3.35 (m, 1H), 2.22–2.07 (m, 1H), 1.96–1.84 (m, 1H), 1.72–1.52 (comp, 2H), 1.38–1.00 (comp, 4H).

**<sup>13</sup>C NMR** (100 MHz, (CD<sub>3</sub>)<sub>2</sub>SO): δ = 179.3, 148.8, 131.9, 120.2, 119.6 (q, *J*<sub>C-F</sub> = 326.1 Hz), 70.6, 59.5, 34.3, 29.7, 23.9, 23.7.

**<sup>19</sup>F-NMR** (377 MHz, (CD<sub>3</sub>)<sub>2</sub>SO): δ = -78.82.

**HRMS (ESI-TOF):** Calculated for C<sub>14</sub>H<sub>18</sub>F<sub>3</sub>N<sub>2</sub>O<sub>3</sub>S<sub>2</sub> [M + H]<sup>+</sup>: 383.0705, found 383.0725.

**1-(3,5-Bis(trifluoromethyl)phenyl)-3-((1*R*,2*R*)-2-hydroxycyclopentyl)thiourea**

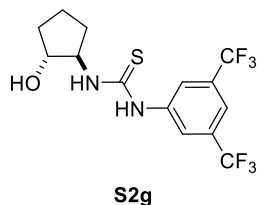

Following general procedure B, compound **S2g** was obtained from (1*R*, 2*S*)-2-aminocyclopentan-1-ol hydrochloride (110 mg, 0.8 mmol, 1 equiv) and 3,5-bis(trifluoromethyl)phenyl isothiocyanate (206 mg, 0.76 mmol, 0.95 equiv) as a white solid in 95% yield (269 mg).

**Characterization data for S2g:**

**R<sub>f</sub>** = 0.34 in hexanes/EtOAc 50:50 v/v.

**mp** = 74–76 °C.

**[α]<sub>D</sub><sup>20</sup>** = +32.44 (c 0.5, CHCl<sub>3</sub>).

**<sup>1</sup>H NMR** (400 MHz, (CD<sub>3</sub>)<sub>2</sub>SO): δ = 9.88 (s, 1H), 8.50–8.00 (comp, 3H), 7.70 (s, 1H), 4.83 (br s, 1H), 4.43–4.16 (m, 1H), 4.04–3.93 (m, 1H), 2.20–2.02 (m, 1H), 1.96–1.77 (m, 1H), 1.75–1.25 (comp, 4H).

**<sup>13</sup>C NMR** (100 MHz, (CD<sub>3</sub>)<sub>2</sub>SO): δ = 180.3, 142.0, 130.1 (q, *J*<sub>C-F</sub> = 32.2 Hz), 123.3 (q, *J*<sub>C-F</sub> = 272.6 Hz), 121.6, 115.8, 75.6, 62.2, 32.2, 29.1, 20.3.

**<sup>19</sup>F-NMR** (565 MHz, (CD<sub>3</sub>)<sub>2</sub>SO): δ = –61.60.

**HRMS (ESI-TOF)**: Calculated for C<sub>14</sub>H<sub>15</sub>F<sub>6</sub>N<sub>2</sub>OS [M + H]<sup>+</sup>: 373.0804, found 373.0817.

### General Procedure C for the Preparation of CBSCA Catalysts

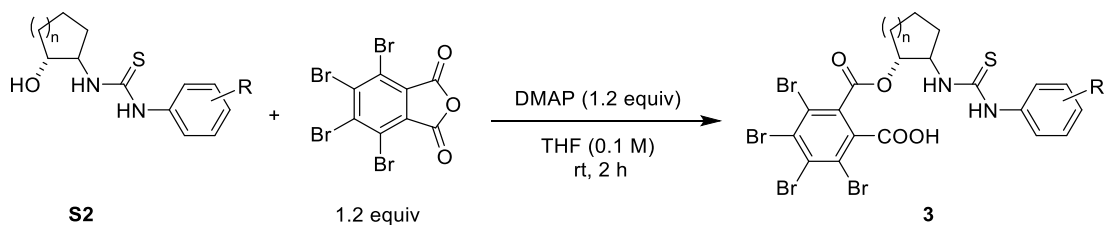

To a solution of **S2** in THF (0.1 M) were added 4-*N,N*-dimethylaminopyridine (DMAP) (1.2 equiv) and tetrabromophthalic anhydride (1.2 equiv). The resulting mixture was stirred at room temperature for 2 h and then transferred to a separatory funnel. EtOAc (50 mL) was added and the solution washed with 1 M HCl (25 mL  $\times$  2), saturated aqueous NaHCO<sub>3</sub> (25 mL), and 1 M HCl (25 mL), and dried over anhydrous Na<sub>2</sub>SO<sub>4</sub>. The solvent was removed under reduced pressure and the residue purified by neutral Al<sub>2</sub>O<sub>3</sub> chromatography (using a gradient eluent from CH<sub>2</sub>Cl<sub>2</sub> to MeOH/CH<sub>2</sub>Cl<sub>2</sub> 10:90 v/v to MeOH/CH<sub>2</sub>Cl<sub>2</sub> 20:80 v/v to MeOH/CH<sub>2</sub>Cl<sub>2</sub>/HCOOH 20:79:1 v/v/v). The combined fractions were concentrated and re-dissolved in CH<sub>2</sub>Cl<sub>2</sub> (25 mL) and then washed with 1 M HCl (25 mL  $\times$  2). The combined aqueous layers were back-extracted with CH<sub>2</sub>Cl<sub>2</sub> (2  $\times$  20 mL). The combined organic layers were dried over anhydrous Na<sub>2</sub>SO<sub>4</sub>. Finally, the solvent was removed under reduced pressure and the resulting solid dried under high vacuum.

**2,3,4,5-Tetrabromo-6-(((1*R*,2*R*)-2-(3-(3-(pentafluoro- $\lambda^6$ -sulfanyl)phenyl)thioureido)cyclohexyl)oxy)carbonyl)benzoic acid**

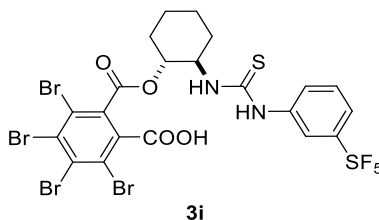

Following general procedure C, compound **3i** was obtained from **S2e** (94 mg, 0.25 mmol, 1 equiv) and tetrabromophthalic anhydride (139 mg, 0.3 mmol, 1.2 equiv) as a light-yellow solid in 72% yield (151 mg).

**Characterization data for 3i:**

**R<sub>f</sub>** = 0.29 in MeOH/CH<sub>2</sub>Cl<sub>2</sub> 10:90 v/v.

**mp** = 163–165 °C.

**[ $\alpha$ ]<sub>D</sub><sup>20</sup>** = +32.53 (c 0.5, CHCl<sub>3</sub>).

**<sup>1</sup>H NMR** (600 MHz, (CD<sub>3</sub>)<sub>2</sub>SO):  $\delta$  = 14.33 (br s, 1H), 9.78 (s, 1H), 8.22 (s, 1H), 7.98 (s, 1H), 7.70–7.46 (comp, 3H), 5.14–4.96 (m, 1H), 4.68–4.38 (m, 1H), 2.12–1.96 (comp, 2H), 1.77–1.62 (comp, 2H), 1.54–1.25 (comp, 4H).

**<sup>13</sup>C NMR** (150 MHz, (CD<sub>3</sub>)<sub>2</sub>SO):  $\delta$  = 180.1, 165.5, 163.9, 152.6–152.1 (m), 140.4, 136.5, 134.3, 131.7, 130.8, 129.1, 126.5, 122.0, 121.7, 120.8, 120.0, 76.3, 55.1, 30.3, 29.6, 23.4, 23.0.

**<sup>19</sup>F-NMR** (377 MHz, (CD<sub>3</sub>)<sub>2</sub>SO):  $\delta$  = 87.49 (p,  $J_{F-F}$  = 151.2 Hz, 1F), 63.81 (d,  $J_{F-F}$  = 151.1 Hz, 4F).

**HRMS (ESI-TOF):** Calculated for C<sub>21</sub>H<sub>16</sub><sup>79</sup>Br<sup>79</sup>Br<sup>81</sup>Br<sup>81</sup>BrF<sub>5</sub>N<sub>2</sub>O<sub>4</sub>S<sub>2</sub> [M – H]<sup>–</sup>: 838.7170, found 838.7206.

**2-(((1*R*,2*R*)-2-(3-(3,5-Bis(pentafluoro- $\lambda^6$ -sulfanyl)phenyl)thiureido)cyclohexyl)oxy)carbonyl)-3,4,5,6-tetrabromobenzoic acid**

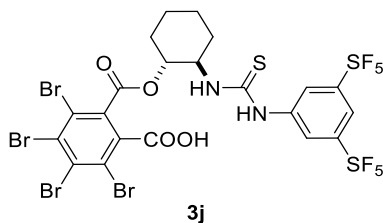

Following general procedure C, compound **3j** was obtained from **S2c** (126 mg, 0.25 mmol, 1 equiv) and tetrabromophthalic anhydride (139 mg, 0.3 mmol, 1.2 equiv) as a white solid in 81% yield (196 mg).

**Characterization data for 3j:**

$R_f = 0.24$  in MeOH/CH<sub>2</sub>Cl<sub>2</sub> 10:90 v/v.

**mp** = 146–148 °C.

$[\alpha]_D^{20} = +16.18$  (c 0.5, CHCl<sub>3</sub>).

**<sup>1</sup>H NMR** (600 MHz, (CD<sub>3</sub>)<sub>2</sub>SO):  $\delta = 14.37$  (br s, 1H), 10.12 (s, 1H), 8.47–8.23 (comp, 3H), 7.99 (s, 1H), 5.11–5.01 (m, 1H), 4.63–4.47 (m, 1H), 2.15–2.05 (m, 1H), 2.04–1.94 (m, 1H), 1.79–1.61 (comp, 2H), 1.52–1.18 (comp, 4H).

**<sup>13</sup>C NMR** (150 MHz, (CD<sub>3</sub>)<sub>2</sub>SO):  $\delta = 180.3, 165.5, 163.9, 152.1$ – $151.0$  (m), 141.8, 136.5, 134.3, 131.7, 130.7, 123.6, 122.0, 121.7, 117.3, 76.3, 55.3, 30.1, 29.5, 23.4, 22.9.

**<sup>19</sup>F-NMR** (377 MHz, (CD<sub>3</sub>)<sub>2</sub>SO):  $\delta = 84.49$  (p,  $J_{F-F} = 151.8$  Hz, 2F), 64.05 (d,  $J_{F-F} = 151.9$  Hz, 8F).

**HRMS (ESI-TOF):** Calculated for C<sub>21</sub>H<sub>15</sub><sup>79</sup>Br<sup>79</sup>Br<sup>81</sup>Br<sup>81</sup>BrF<sub>10</sub>N<sub>2</sub>O<sub>4</sub>S<sub>3</sub> [M – H]<sup>–</sup>: 964.6732, found 964.6724.

**2,3,4,5-Tetrabromo-6-((((1R,2R)-2-(3-(4-(pentafluoro- $\lambda^6$ -sulfanyl)phenyl)thioureido)cyclohexyl)oxy)carbonyl)benzoic acid**

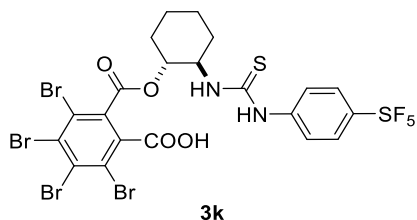

Following general procedure C, compound **3k** was obtained from **S2d** (188 mg, 0.5 mmol, 1 equiv) and tetrabromophthalic anhydride (278 mg, 0.6 mmol, 1.2 equiv) as a white solid in 76% yield (319 mg).

**Characterization data for 3k:**

$R_f$  = 0.30 in MeOH/CH<sub>2</sub>Cl<sub>2</sub> 10:90 v/v.

$mp$  = 137–139 °C.

$[\alpha]_D^{20}$  = +17.76 (c 0.5, CHCl<sub>3</sub>).

<sup>1</sup>H NMR (600 MHz, (CD<sub>3</sub>)<sub>2</sub>SO):  $\delta$  = 14.32 (br s, 1H), 9.95 (s, 1H), 8.15–7.60 (comp, 4H), 5.23–4.85 (s, 1H), 4.73–4.33 (s, 1H), 2.30–1.93 (comp, 2H), 1.90–1.00 (comp, 7H).

<sup>13</sup>C NMR (150 MHz, (CD<sub>3</sub>)<sub>2</sub>SO):  $\delta$  = 179.8, 165.6, 164.0, 147.9–147.0 (m), 143.0, 136.8, 134.3, 131.7, 130.8, 126.3, 122.1, 121.6, 76.3, 55.3, 30.2, 29.6, 23.4, 23.0.

<sup>19</sup>F-NMR (565 MHz, (CD<sub>3</sub>)<sub>2</sub>SO):  $\delta$  = 88.70 (p,  $J_{F-F}$  = 150.6 Hz, 1F), 65.00 (d,  $J_{F-F}$  = 150.6 Hz, 4F).

**HRMS (ESI-TOF):** Calculated for C<sub>21</sub>H<sub>16</sub><sup>79</sup>Br<sup>79</sup>Br<sup>81</sup>Br<sup>81</sup>BrF<sub>5</sub>N<sub>2</sub>O<sub>4</sub>S<sub>2</sub> [M – H]<sup>–</sup>: 838.7170, found 838.7214.

**2,3,4,5-Tetrabromo-6-(((1*R*,2*R*)-2-(3-(4-((trifluoromethyl)sulfonyl)phenyl)thioureido)cyclohexyl)oxy)carbonyl)benzoic acid**

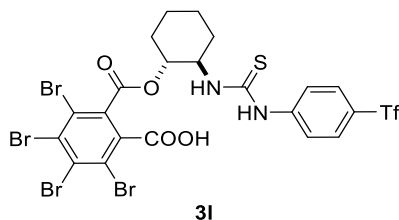

Following general procedure C, compound **31** was obtained from **S2f** (574 mg, 1.5 mmol, 1 equiv) and tetrabromophthalic anhydride (835 mg, 1.8 mmol, 1.2 equiv) as a white solid in 88% yield (1.12 g).

**Characterization data for 31:**

**R<sub>f</sub>** = 0.25 in MeOH/CH<sub>2</sub>Cl<sub>2</sub> 10:90 v/v.

**mp** = 124–126 °C.

**[α]<sub>D</sub><sup>20</sup>** = +40.62 (c 0.5, CHCl<sub>3</sub>).

**<sup>1</sup>H NMR** (600 MHz, (CD<sub>3</sub>)<sub>2</sub>SO): δ = 10.28 (s, 1H), 8.46–8.28 (m, 1H), 8.08–7.93 (comp, 4H), 5.11–4.99 (m, 1H), 4.64–4.45 (m, 1H), 2.13–2.00 (comp, 2H), 1.76–1.63 (comp, 2H), 1.53–1.27 (comp, 4H).

**<sup>13</sup>C NMR** (150 MHz, (CD<sub>3</sub>)<sub>2</sub>SO): δ = 179.5, 165.5, 163.9, 148.2, 136.6, 136.0, 134.2, 131.8, 130.9, 130.6, 122.1, 121.6, 121.2, 119.5 (q, *J*<sub>C-F</sub> = 326.1 Hz), 76.1, 55.2, 29.9, 29.5, 23.3, 22.9.

**<sup>19</sup>F-NMR** (377 MHz, (CD<sub>3</sub>)<sub>2</sub>SO): δ = –78.77.

**HRMS (ESI-TOF):** Calculated for C<sub>22</sub>H<sub>16</sub><sup>79</sup>Br<sup>79</sup>Br<sup>81</sup>Br<sup>81</sup>BrF<sub>3</sub>N<sub>2</sub>O<sub>6</sub>S<sub>2</sub> [M – H]<sup>–</sup>: 844.7101, found 844.7137.

**2-(((1*R*,2*R*)-2-(3-(3,5-Bis(trifluoromethyl)phenyl)thioureido)cyclopentyl)oxy)carbonyl)-3,4,5,6-tetrabromobenzoic acid**

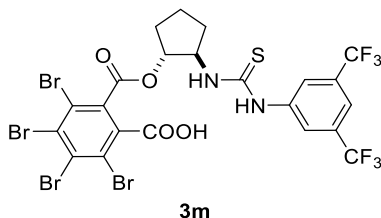

Following general procedure C, compound **3m** was obtained from **S2g** (558 mg, 1.5 mmol, 1 equiv) and tetrabromophthalic anhydride (835 mg, 1.8 mmol, 1.2 equiv) as a white solid in 65% yield (815 mg).

**Characterization data for 3m:**

$R_f = 0.34$  in MeOH/CH<sub>2</sub>Cl<sub>2</sub> 10:90 v/v.

**mp** = 105–107 °C.

$[\alpha]_D^{20} = +65.76$  (c 0.5, CHCl<sub>3</sub>).

**<sup>1</sup>H NMR** (600 MHz, (CD<sub>3</sub>)<sub>2</sub>SO):  $\delta = 14.45$  (br s, 1H), 10.01 (s, 1H), 8.45 (s, 1H), 8.22 (s, 2H), 7.75 (s, 1H), 5.35–5.28 (m, 1H), 4.82–4.62 (m, 1H), 2.20–2.02 (comp, 2H), 1.83–1.71 (comp, 3H), 1.64–1.53 (m, 1H).

**<sup>13</sup>C NMR** (150 MHz, (CD<sub>3</sub>)<sub>2</sub>SO):  $\delta = 180.5$ , 165.6, 163.8, 141.8, 136.5, 133.9, 131.9, 131.0, 130.1 (q,  $J_{C-F} = 32.2$  Hz), 123.2 (q,  $J_{C-F} = 272.8$  Hz), 122.2, 122.1, 116.3, 81.5, 59.6, 29.7, 29.3, 21.3.

**<sup>19</sup>F-NMR** (565 MHz, (CD<sub>3</sub>)<sub>2</sub>SO):  $\delta = -61.54$ .

**HRMS (ESI-TOF):** Calculated for C<sub>22</sub>H<sub>13</sub><sup>79</sup>Br<sup>79</sup>Br<sup>81</sup>Br<sup>81</sup>BrF<sub>6</sub>N<sub>2</sub>O<sub>4</sub>S [M – H]<sup>–</sup>: 834.7200, found 834.7239.



**2-(((1*R*,2*R*)-2-(3-(3,5-Bis(pentafluoro- $\lambda^6$ -sulfanyl)phenyl)thiureido)cyclopentyl)oxy)carbonyl)-3,4,5,6-tetrabromobenzoic acid**

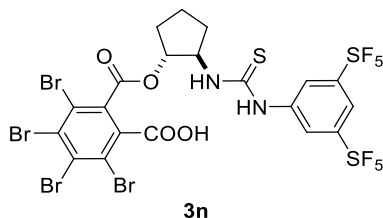

To a solution of **S2b** (796 mg, 1.63 mmol) in THF (16 mL) were added 4-*N,N*-dimethylaminopyridine (DMAP) (239 mg, 1.96 mmol, 1.2 equiv) and tetrabromophthalic anhydride (909 mg, 1.96 mmol, 1.2 equiv). The resulting mixture was stirred at room temperature for 2 h and then transferred to a separatory funnel. EtOAc (150 mL) was added and the solution washed with 1 M HCl (60 mL  $\times$  2), saturated aqueous NaHCO<sub>3</sub> (60 mL), and 1 M HCl (60 mL), and dried over anhydrous Na<sub>2</sub>SO<sub>4</sub>. The solvent was removed under reduced pressure and the residue purified by neutral Al<sub>2</sub>O<sub>3</sub> chromatography (using a gradient eluent from CH<sub>2</sub>Cl<sub>2</sub> to MeOH/CH<sub>2</sub>Cl<sub>2</sub> 10:90 v/v to MeOH/CH<sub>2</sub>Cl<sub>2</sub> 20:80 v/v to MeOH/CH<sub>2</sub>Cl<sub>2</sub>/HCOOH 20:79:1 v/v/v). The combined fractions were concentrated and re-dissolved in CH<sub>2</sub>Cl<sub>2</sub> (50 mL) and then washed with 1 M HCl (50 mL  $\times$  2). The combined aqueous layers were back-extracted with CH<sub>2</sub>Cl<sub>2</sub> (2  $\times$  25 mL). The combined organic layers were dried over anhydrous Na<sub>2</sub>SO<sub>4</sub>. Finally, the solvent was removed under reduced pressure and the residue dried under high vacuum to provide **3n** as a white solid in 78% yield (1.21 g).

**Characterization data for 3n:**

R<sub>f</sub> = 0.22 in MeOH/CH<sub>2</sub>Cl<sub>2</sub> 10:90 v/v.

mp = 129–131 °C.

[ $\alpha$ ]<sub>D</sub><sup>20</sup> = +48.17 (c 0.5, CHCl<sub>3</sub>).

<sup>1</sup>H NMR (600 MHz, (CD<sub>3</sub>)<sub>2</sub>SO):  $\delta$  = 14.37 (br s, 1H), 10.44 (s, 1H), 8.71 (s, 1H), 8.57–8.38 (m, 2H), 8.06–7.88 (m, 1H), 5.37–5.23 (m, 1H), 4.82–4.61 (m, 1H), 2.20–2.02 (comp, 2H), 1.84–1.54 (comp, 4H).

<sup>13</sup>C NMR (150 MHz, (CD<sub>3</sub>)<sub>2</sub>SO):  $\delta$  = 180.5, 165.7, 163.8, 152.3–151.5 (m), 141.9, 136.7, 133.9, 131.9, 130.9, 130.6, 122.7, 122.0, 117.1, 81.5, 59.6, 29.6, 29.3, 21.2.

<sup>19</sup>F-NMR (377 MHz, (CD<sub>3</sub>)<sub>2</sub>SO):  $\delta$  = 84.49 (p,  $J_{F-F}$  = 151.7, 2F), 64.01 (d,  $J_{F-F}$  = 151.7 Hz, 8F).

HRMS (ESI-TOF): Calculated for C<sub>20</sub>H<sub>13</sub><sup>79</sup>Br<sup>79</sup>Br<sup>81</sup>Br<sup>81</sup>BrF<sub>10</sub>N<sub>2</sub>O<sub>4</sub>S<sub>3</sub> [M – H]<sup>–</sup>: 950.6576, found 950.6619.

**Synthesis and Characterization of 1-(3,5-bis(pentafluoro- $\lambda^6$ -sulfanyl)phenyl)-3-((1*R*,2*R*)-2-(dimethylamino)cyclohexyl)thiourea**

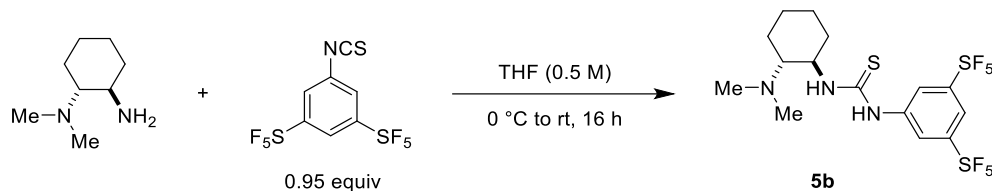

To an ice cooled solution of (1*R*,2*R*)-*N,N*-dimethylcyclohexane-1,2-diamine (71 mg, 0.5 mmol, 1 equiv) in THF (1 mL, 0.5 M) isothiocyanate **S1b** (184 mg, 0.475 mmol, 0.95 equiv) was added dropwise. The resulting mixture was then allowed to warm to room temperature and stirred for 16 h and then the solvent was evaporated under reduced pressure. The residue was purified by silica gel chromatography (using a gradient eluent from MeOH/CH<sub>2</sub>Cl<sub>2</sub> 1:99 v/v to MeOH/CH<sub>2</sub>Cl<sub>2</sub> 3:97 v/v) to provide **5b** as a white solid in 74% yield (187 mg).

**Characterization data for 5b:**

**R<sub>f</sub>** = 0.26 in CH<sub>2</sub>Cl<sub>2</sub>/MeOH 90:10 v/v.

**mp** = 165–167 °C.

**[ $\alpha$ ]<sub>D</sub><sup>20</sup>** = –99.22 (c 0.5, CHCl<sub>3</sub>).

**<sup>1</sup>H NMR** (600 MHz, (CD<sub>3</sub>)<sub>2</sub>SO):  $\delta$  = 10.22 (s, 1H), 8.49–8.19 (comp, 3H), 7.91 (s, 1H), 4.30–3.95 (m, 1H), 2.62–2.52 (m, 1H), 2.32–2.10 (comp, 7H), 1.91–1.55 (comp, 3H), 1.31–1.05 (comp, 4H).

**<sup>13</sup>C NMR** (150 MHz, (CD<sub>3</sub>)<sub>2</sub>SO):  $\delta$  = 178.7, 152.45–151.69 (m), 141.9, 121.6, 116.4, 65.1, 55.0, 54.9, 31.6, 24.6, 24.5, 21.2.

**<sup>19</sup>F-NMR** (377 MHz, (CD<sub>3</sub>)<sub>2</sub>SO):  $\delta$  = 84.42 (p,  $J_{F-F}$  = 152.2 Hz, 2F), 63.82 (d,  $J_{F-F}$  = 152.1 Hz, 8F).

**HRMS (ESI-TOF)**: Calculated for C<sub>15</sub>H<sub>21</sub>F<sub>10</sub>N<sub>3</sub>S<sub>3</sub> [M]<sup>+</sup>: 529.0738, found 529.0757.

### General procedure D for the Catalytic Enantioselective Synthesis of 2-pyrazolines

To a flame dried vial were successively added the  $\alpha,\beta$ -unsaturated ketone (0.26 mmol, 1.05 equiv), acid catalyst **3n** (23.8 mg, 0.025 mmol, 10 mol%), 4 Å MS (100 mg), and dry toluene (2.5 mL, 0.1 M). Aryl hydrazine (0.25 mmol, 1 equiv) was then added, and the resulting mixture was stirred under nitrogen at room temperature for the indicated time before being quenched with triethylamine (50  $\mu$ L). The resulting mixture was directly purified by flash chromatography on silica gel using EtOAc/hexanes/Et<sub>3</sub>N (2/98/0.1) as the eluent.

Racemic products (for SFC assays) were prepared from the  $\alpha,\beta$ -unsaturated ketone (0.1 mmol, 1 equiv), hydrazine (0.2 mmol, 2 equiv), and concentrated sulfuric acid (0.5 mmol, 5 equiv) in ethanol (1 mL, 0.1 M). The resulting mixture was stirred under reflux until  $\alpha,\beta$ -unsaturated ketone was consumed as indicated by TLC and then directly purified by flash chromatography on silica gel using EtOAc/hexanes (2/98) as the eluent.

## Characterization Data of Products

### (*S*)-3-Methyl-1,5-diphenyl-4,5-dihydro-1*H*-pyrazole

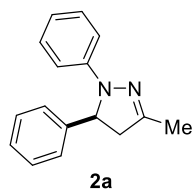

To a flame dried vial was added (*E*)-4-phenylbut-3-en-2-one (38 mg, 0.26 mmol, 1.05 equiv), acid catalyst **3n** (23.8 mg, 0.025 mmol, 10 mol%), 4 Å MS (100 mg), and dry toluene (2.5 mL, 0.1 M). To the resulting mixture phenylhydrazine (25 μL, 0.25 mmol, 1.0 equiv) was then added and the resulting mixture was stirred under nitrogen at room temperature for 28 h before being quenched with triethylamine (50 μL). The resulting mixture was directly purified by flash chromatography on silica gel using EtOAc/hexanes/Et<sub>3</sub>N (2/98/0.1) as the eluent. Compound **2a** was obtained as a white solid in 96% yield (57 mg).

#### Characterization data for **2a**:

**R<sub>f</sub>** = 0.43 in hexanes/EtOAc 80:20 v/v.

**mp** = 129–131 °C.

$[\alpha]_{\text{D}}^{20} = -222.34$  (c 0.5, CHCl<sub>3</sub>, 92% ee).

**<sup>1</sup>H NMR** (400 MHz, CDCl<sub>3</sub>) δ = 7.37–7.29 (comp, 4H), 7.29–7.23 (m, 1H), 7.18–7.11 (comp, 2H), 6.96–6.90 (comp, 2H), 6.78–6.71 (m, 1H), 5.02 (dd, *J* = 11.9, 8.1 Hz, 1H), 3.47–3.37 (m, 1H), 2.77–2.68 (m, 1H), 2.08 (s, 3H).

**<sup>13</sup>C NMR** (100 MHz, CDCl<sub>3</sub>) δ = 148.5, 146.0, 143.0, 129.0, 128.8, 127.3, 125.9, 118.6, 113.1, 64.7, 47.8, 15.9.

**HRMS (ESI-TOF)**: Calculated for C<sub>16</sub>H<sub>17</sub>N<sub>2</sub> [M + H]<sup>+</sup>: 237.1386, found 237.1387.

**SFC**: Daicel Chiralcel OJ-H, column temperature = 40 °C, CO<sub>2</sub>/MeOH = 80/20, Flow rate = 2 mL/min, UV = 254 nm, *t<sub>R</sub>* = 3.9 min (major) and *t<sub>R</sub>* = 5.2 min (minor).

The absolute configuration was assigned by analogy.

**(S)-5-(2-Fluorophenyl)-3-methyl-1-phenyl-4,5-dihydro-1H-pyrazole**

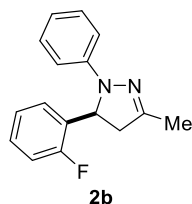

Following general procedure D (reaction performed at room temperature for 32 h), compound **2b** was obtained from phenylhydrazine (25  $\mu$ L, 0.25 mmol, 1 equiv) and (*E*)-4-(2-fluorophenyl)but-3-en-2-one (43 mg, 0.26 mmol, 1.05 equiv) as a white solid in 91% yield (58 mg).

**Characterization data for 2b:**

**R<sub>f</sub>** = 0.39 in hexanes/EtOAc 80:20 v/v.

**mp** = 76–78 °C.

**[ $\alpha$ ]<sub>D</sub><sup>20</sup>** = –198.45 (c 0.5, CHCl<sub>3</sub>, 93% ee).

**<sup>1</sup>H NMR** (400 MHz, CDCl<sub>3</sub>)  $\delta$  = 7.25–7.14 (comp, 2H), 7.14–7.07 (comp, 2H), 7.07–6.96 (m, 2H), 6.85 (d, *J* = 8.3 Hz, 2H), 6.70 (t, *J* = 7.3 Hz, 1H), 5.24 (dd, *J* = 12.0, 7.6 Hz, 1H), 3.44 (dd, *J* = 17.6, 12.0 Hz, 1H), 2.64 (dd, *J* = 17.6, 7.6 Hz, 1H), 2.01 (s, 3H).

**<sup>13</sup>C NMR** (100 MHz, CDCl<sub>3</sub>)  $\delta$  = 159.3 (d, *J*<sub>C-F</sub> = 245.0 Hz), 149.0, 145.8, 129.5 (d, *J*<sub>C-F</sub> = 13.3 Hz), 128.9, 128.8, 127.6 (d, *J*<sub>C-F</sub> = 4.0 Hz), 124.66 (d, *J*<sub>C-F</sub> = 3.5 Hz), 118.8, 115.5 (d, *J*<sub>C-F</sub> = 20.9 Hz), 112.9, 58.0 (d, *J*<sub>C-F</sub> = 2.9 Hz), 46.3, 15.9.

**<sup>19</sup>F-NMR** (377 MHz, CDCl<sub>3</sub>):  $\delta$  = –118.84.

**HRMS (ESI-TOF):** Calculated for C<sub>16</sub>H<sub>15</sub>FN<sub>2</sub> [M]<sup>+</sup>: 254.1219, found 254.1218.

**SFC:** Daicel Chiralcel OJ-H, column temperature = 40 °C, CO<sub>2</sub>/MeOH = 90/10, Flow rate = 2 mL/min, UV = 280 nm, t<sub>R</sub> = 3.1 min (major) and t<sub>R</sub> = 5.1 min (minor).

The absolute configuration was assigned by analogy.

**(S)-5-(2-Bromophenyl)-3-methyl-1-phenyl-4,5-dihydro-1H-pyrazole**

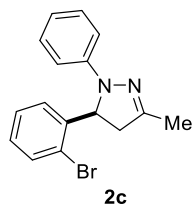

Following general procedure D (reaction performed at room temperature for 32 h), compound **2c** was obtained from phenylhydrazine (25  $\mu$ L, 0.25 mmol, 1 equiv) and (*E*)-4-(2-bromophenyl)but-3-en-2-one (59 mg, 0.26 mmol, 1.05 equiv) as a white solid in 74% yield (58 mg).

**Characterization data for 2c:**

**R<sub>f</sub>** = 0.34 in hexanes/EtOAc 80:20 v/v.

**mp** = 89–91 °C.

**[ $\alpha$ ]<sub>D</sub><sup>20</sup>** = –216.5 (c 0.5, CHCl<sub>3</sub>, 93% ee).

**<sup>1</sup>H NMR** (400 MHz, CDCl<sub>3</sub>)  $\delta$  = 7.69 (d, *J* = 7.9 Hz, 1H), 7.39–7.17 (comp, 5H), 6.93 (d, *J* = 8.1 Hz, 2H), 6.84 (t, *J* = 7.3 Hz, 1H), 5.42 (dd, *J* = 12.0, 7.6 Hz, 1H), 3.67 (dd, *J* = 17.7, 12.1 Hz, 1H), 2.69 (dd, *J* = 17.8, 7.5 Hz, 1H), 2.15 (s, 3H).

**<sup>13</sup>C NMR** (100 MHz, CDCl<sub>3</sub>)  $\delta$  = 148.6, 145.5, 141.3, 133.0, 129.0, 128.9, 128.2, 127.6, 121.8, 118.7, 112.8, 63.9, 46.1, 15.9.

**HRMS (ESI-TOF):** Calculated for C<sub>16</sub>H<sub>16</sub>BrN<sub>2</sub> [M + H]<sup>+</sup>: 315.0491, found 315.0503.

**SFC:** Daicel Chiralcel OJ-H, column temperature = 40 °C, CO<sub>2</sub>/MeOH = 90/10, Flow rate = 2 mL/min, UV = 280 nm, t<sub>R</sub> = 9.4 min (major) and t<sub>R</sub> = 7.1 min (minor).

The absolute configuration was assigned by analogy.

**(S)-5-(2-Methoxyphenyl)-3-methyl-1-phenyl-4,5-dihydro-1H-pyrazole**

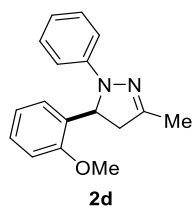

Following general procedure D (reaction performed at room temperature for 28 h), compound **2d** was obtained from phenylhydrazine (25  $\mu$ L, 0.25 mmol, 1 equiv) and (*E*)-4-(2-methoxyphenyl)but-3-en-2-one (46 mg, 0.26 mmol, 1.05 equiv) as a white solid in 97% yield (64 mg).

**Characterization data for 2d:**

**R<sub>f</sub>** = 0.33 in hexanes/EtOAc 80:20 v/v.

**mp** = 66–68 °C.

**[ $\alpha$ ]<sub>D</sub><sup>20</sup>** = –145.08 (c 0.5, CHCl<sub>3</sub>, 83% ee).

**<sup>1</sup>H NMR** (400 MHz, CDCl<sub>3</sub>)  $\delta$  = 7.41–7.23 (comp, 4H), 7.07–6.95 (comp, 4H), 6.85 (t, *J* = 7.3 Hz, 1H), 5.43 (dd, *J* = 12.0, 7.6 Hz, 1H), 4.03 (s, 3H), 3.60 (dd, *J* = 17.7, 12.0 Hz, 1H), 2.71 (dd, *J* = 17.7, 7.6 Hz, 1H), 2.17 (s, 3H).

**<sup>13</sup>C NMR** (100 MHz, CDCl<sub>3</sub>)  $\delta$  = 156.0, 149.3, 146.0, 130.4, 128.8, 128.2, 126.6, 120.9, 118.2, 112.8, 110.4, 58.9, 55.4, 46.2, 16.0.

**HRMS (ESI-TOF):** Calculated for C<sub>17</sub>H<sub>18</sub>N<sub>2</sub>ONa [M + Na]<sup>+</sup>: 289.1311, found 289.1329.

**SFC:** Daicel Chiralcel OJ-H, column temperature = 40 °C, CO<sub>2</sub>/MeOH = 80/20, Flow rate = 2 mL/min, UV = 280 nm, t<sub>R</sub> = 7.8 min (major) and t<sub>R</sub> = 8.5 min (minor).

The absolute configuration was assigned by analogy.

**(S)-5-(3-Chlorophenyl)-3-methyl-1-phenyl-4,5-dihydro-1H-pyrazole**

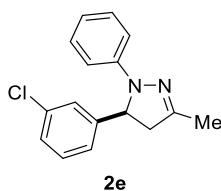

Following general procedure D (reaction performed at room temperature for 28 h), compound **2e** was obtained from phenylhydrazine (25  $\mu$ L, 0.25 mmol, 1 equiv) and (*E*)-4-(3-chlorophenyl)but-3-en-2-one (47 mg, 0.26 mmol, 1.05 equiv) as a white solid in 82% yield (56 mg).

**Characterization data for 2e:**

**R<sub>f</sub>** = 0.37 in hexanes/EtOAc 90:10 v/v.

**mp** = 75–77 °C.

**[ $\alpha$ ]<sub>D</sub><sup>20</sup>** = –241.52 (c 0.5, CHCl<sub>3</sub>, 94% ee).

**<sup>1</sup>H NMR** (400 MHz, CDCl<sub>3</sub>)  $\delta$  = 7.26 (s, 1H), 7.24–7.16 (comp, 2H), 7.15–7.06 (comp, 3H), 6.85 (d, *J* = 8.2 Hz, 2H), 6.71 (t, *J* = 7.3 Hz, 1H), 4.91 (dd, *J* = 12.0, 8.1 Hz, 1H), 3.35 (dd, *J* = 17.6, 12.0 Hz, 1H), 2.64 (dd, *J* = 17.6, 8.1 Hz, 1H), 2.01 (s, 3H).

**<sup>13</sup>C NMR** (100 MHz, CDCl<sub>3</sub>)  $\delta$  = 148.4, 145.9, 145.2, 134.9, 130.4, 128.9, 127.7, 126.1, 124.1, 118.9, 113.1, 64.3, 47.7, 15.8.

**HRMS (ESI-TOF):** Calculated for C<sub>16</sub>H<sub>16</sub>ClN<sub>2</sub> [M + H]<sup>+</sup>: 271.0997, found 271.1003.

**SFC:** Daicel Chiralcel OJ-H, column temperature = 40 °C, CO<sub>2</sub>/MeOH = 80/20, Flow rate = 2 mL/min, UV = 280 nm, t<sub>R</sub> = 4.1 min (major) and t<sub>R</sub> = 6.1 min (minor).

The absolute configuration was assigned by analogy.



**(S)-5-(3-Methoxyphenyl)-3-methyl-1-phenyl-4,5-dihydro-1H-pyrazole**

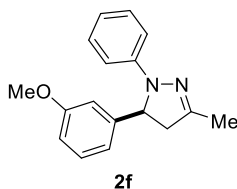

Following general procedure D (reaction performed at room temperature for 28 h), compound **2f** was obtained from phenylhydrazine (25  $\mu$ L, 0.25 mmol, 1 equiv) and (*E*)-4-(3-methoxyphenyl)but-3-en-2-one (46 mg, 0.26 mmol, 1.05 equiv) as a white solid in 93% yield (62 mg).

**Characterization data for 2f:**

**R<sub>f</sub>** = 0.31 in hexanes/EtOAc 90:10 v/v.

**mp** = 71–73 °C.

**[ $\alpha$ ]<sub>D</sub><sup>20</sup>** = –332.11 (c 0.5, CHCl<sub>3</sub>, 91% ee).

**<sup>1</sup>H NMR** (400 MHz, CDCl<sub>3</sub>)  $\delta$  = 7.34–7.27 (m, 1H), 7.20 (t, *J* = 7.8 Hz, 2H), 7.02–6.94 (comp, 3H), 6.91 (s, 1H), 6.88–6.76 (comp, 2H), 5.01 (dd, *J* = 11.9, 8.3 Hz, 1H), 3.82 (s, 3H), 3.45 (dd, *J* = 17.5, 11.9 Hz, 1H), 2.78 (dd, *J* = 17.6, 8.3 Hz, 1H), 2.12 (s, 3H).

**<sup>13</sup>C NMR** (100 MHz, CDCl<sub>3</sub>)  $\delta$  = 160.2, 148.6, 146.2, 144.8, 130.1, 128.8, 118.7, 118.1, 113.1, 112.7, 111.3, 64.9, 55.2, 47.8, 15.9.

**HRMS (ESI-TOF):** Calculated for C<sub>17</sub>H<sub>19</sub>N<sub>2</sub>O [*M* + H]<sup>+</sup>: 267.1492, found 267.1488.

**SFC:** Daicel Chiralcel OJ-H, column temperature = 40 °C, CO<sub>2</sub>/MeOH = 90/10, Flow rate = 2 mL/min, UV = 280 nm, *t<sub>R</sub>* = 4.1 min (major) and *t<sub>R</sub>* = 5.1 min (minor).

The absolute configuration was assigned by analogy.

**(S)-5-(4-Chlorophenyl)-3-methyl-1-phenyl-4,5-dihydro-1H-pyrazole**

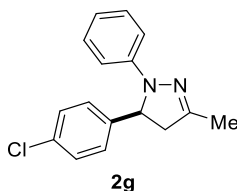

Following general procedure D (reaction performed at room temperature for 28 h), compound **2g** was obtained from phenylhydrazine (25  $\mu$ L, 0.25 mmol, 1 equiv) and (*E*)-4-(4-chlorophenyl)but-3-en-2-one (47 mg, 0.26 mmol, 1.05 equiv) as a white solid in 85% yield (57 mg).

**Characterization data for 2g:**

**R<sub>f</sub>** = 0.37 in hexanes/EtOAc 90:10 v/v.

**mp** = 94–96 °C.

**[ $\alpha$ ]<sub>D</sub><sup>20</sup>** = –143.18 (c 0.5, CHCl<sub>3</sub>, 92% ee).

**<sup>1</sup>H NMR** (400 MHz, CDCl<sub>3</sub>)  $\delta$  = 7.40 (d, *J* = 8.5 Hz, 2H), 7.33 (d, *J* = 8.5 Hz, 2H), 7.28–7.21 (m, 2H), 6.99 (d, *J* = 8.2 Hz, 2H), 6.86 (t, *J* = 7.3 Hz, 1H), 5.07 (dd, *J* = 11.9, 8.0 Hz, 1H), 3.49 (dd, *J* = 17.5, 11.9 Hz, 1H), 2.76 (dd, *J* = 17.5, 8.0 Hz, 1H), 2.16 (s, 3H).

**<sup>13</sup>C NMR** (100 MHz, CDCl<sub>3</sub>)  $\delta$  = 148.4, 145.8, 141.5, 133.0, 129.2, 128.9, 127.3, 118.8, 113.1, 64.1, 47.7, 15.8.

**HRMS (ESI-TOF):** Calculated for C<sub>16</sub>H<sub>16</sub>ClN<sub>2</sub> [M + H]<sup>+</sup>: 271.0997, found 271.1002.

**SFC:** Daicel Chiralcel OJ-H, column temperature = 40 °C, CO<sub>2</sub>/MeOH = 90/10, Flow rate = 2 mL/min, UV = 280 nm, t<sub>R</sub> = 4.1 min (major) and t<sub>R</sub> = 6.3 min (minor).

The absolute configuration was assigned by analogy.

**(S)-3-Methyl-1-phenyl-5-(4-(trifluoromethyl)phenyl)-4,5-dihydro-1H-pyrazole**

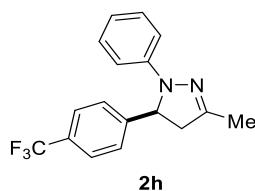

Following general procedure D (reaction performed at room temperature for 40 h), compound **2h** was obtained from phenylhydrazine (25  $\mu$ L, 0.25 mmol, 1 equiv) and (*E*)-4-(4-(trifluoromethyl)phenyl)but-3-en-2-one (56 mg, 0.26 mmol, 1.05 equiv) as a white solid in 73% yield (55 mg).

**Characterization data for 2h:**

**R<sub>f</sub>** = 0.31 in hexanes/EtOAc 90:10 v/v.

**mp** = 101–103 °C.

**[ $\alpha$ ]<sub>D</sub><sup>20</sup>** = -241.24 (c 0.5, CHCl<sub>3</sub>, 96% ee).

**<sup>1</sup>H NMR** (400 MHz, CDCl<sub>3</sub>)  $\delta$  = 7.61 (d, *J* = 8.1 Hz, 2H), 7.44 (d, *J* = 8.1 Hz, 2H), 7.22–7.12 (m, 2H), 6.91 (d, *J* = 8.2 Hz, 2H), 6.79 (t, *J* = 7.3 Hz, 1H), 5.07 (dd, *J* = 12.0, 8.0 Hz, 1H), 3.45 (dd, *J* = 17.5, 12.1 Hz, 1H), 2.70 (dd, *J* = 17.5, 8.0 Hz, 1H), 2.09 (s, 3H).

**<sup>13</sup>C NMR** (100 MHz, CDCl<sub>3</sub>)  $\delta$  = 148.4, 147.0, 145.7, 129.7 (q, *J*<sub>C-F</sub> = 32.5 Hz), 128.9, 126.3, 126.1 (q, *J*<sub>C-F</sub> = 3.9 Hz), 124.05 (q, *J*<sub>C-F</sub> = 272.2 Hz), 119.0, 113.1, 64.3, 47.6, 15.8.

**<sup>19</sup>F-NMR** (377 MHz, CDCl<sub>3</sub>):  $\delta$  = -62.44.

**HRMS (ESI-TOF):** Calculated for C<sub>17</sub>H<sub>16</sub>F<sub>3</sub>N<sub>2</sub> [M + H]<sup>+</sup>: 305.1260, found 305.1253.

**SFC:** Daicel Chiralcel OJ-H, column temperature = 40 °C, CO<sub>2</sub>/MeOH = 97/3, Flow rate = 2 mL/min, UV = 280 nm, t<sub>R</sub> = 2.8 min (major) and t<sub>R</sub> = 4.6 min (minor).

The absolute configuration was assigned by analogy.

**(S)-3-Methyl-1-phenyl-5-(p-tolyl)-4,5-dihydro-1H-pyrazole**

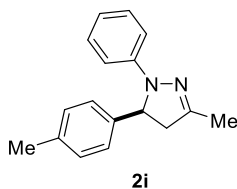

Following general procedure D (reaction performed at room temperature for 28 h), compound **2i** was obtained from phenylhydrazine (25  $\mu$ L, 0.25 mmol, 1 equiv) and (*E*)-4-(*p*-tolyl)but-3-en-2-one (42 mg, 0.26 mmol, 1.05 equiv) as a white solid in 90% yield (56 mg).

**Characterization data for 2i:**

**R<sub>f</sub>** = 0.18 in hexanes/EtOAc 90:10 v/v.

**mp** = 81–83 °C.

**[ $\alpha$ ]<sub>D</sub><sup>20</sup>** = –213.4 (c 0.5, CHCl<sub>3</sub>, 88% ee).

**<sup>1</sup>H NMR** (400 MHz, CDCl<sub>3</sub>)  $\delta$  = 7.24–7.11 (comp, 6H), 6.98–6.91 (m, 2H), 6.75 (t, *J* = 7.3 Hz, 1H), 4.99 (dd, *J* = 11.9, 8.1 Hz, 1H), 3.46–3.34 (m, 1H), 2.76–2.65 (m, 1H), 2.34 (s, 3H), 2.08 (s, 2H).

**<sup>13</sup>C NMR** (100 MHz, CDCl<sub>3</sub>)  $\delta$  = 148.5, 146.1, 140.0, 137.0, 129.7, 128.8, 125.8, 118.5, 113.1, 64.5, 47.9, 21.1, 15.9.

**HRMS (ESI-TOF):** Calculated for C<sub>17</sub>H<sub>19</sub>N<sub>2</sub> [M + H]<sup>+</sup>: 251.1543, found 251.1521.

**SFC:** Daicel Chiralcel OJ-H, column temperature = 40 °C, CO<sub>2</sub>/MeOH = 90/10, Flow rate = 2 mL/min, UV = 280 nm, t<sub>R</sub> = 3.4 min (major) and t<sub>R</sub> = 4.6 min (minor).

The absolute configuration was assigned by analogy.

**(S)-5-(Furan-3-yl)-3-methyl-1-phenyl-4,5-dihydro-1H-pyrazole**

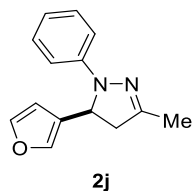

Following general procedure D (reaction performed at room temperature for 28 h), compound **2j** was obtained from phenylhydrazine (25  $\mu$ L, 0.25 mmol, 1 equiv) and (*E*)-4-(furan-3-yl)but-3-en-2-one (35 mg, 0.26 mmol, 1.05 equiv) as a white solid in 92% yield (52 mg).

**Characterization data for 2j:**

**R<sub>f</sub>** = 0.41 in hexanes/EtOAc 90:10 v/v.

**mp** = 72–74 °C.

**[ $\alpha$ ]<sub>D</sub><sup>20</sup>** = –236.12 (c 0.5, CHCl<sub>3</sub>, 89% ee).

**<sup>1</sup>H NMR** (600 MHz, CDCl<sub>3</sub>)  $\delta$  = 7.38–7.35 (m, 1H), 7.35–7.33 (m, 1H), 7.21–7.15 (m, 2H), 7.05–7.00 (m, 2H), 6.78 (t, *J* = 7.3 Hz, 1H), 6.34–6.31 (m, 1H), 4.98 (dd, *J* = 11.5, 7.7 Hz, 1H), 3.34–3.25 (m, 1H), 2.79–2.71 (m, 1H), 2.08 (s, 3H).

**<sup>13</sup>C NMR** (150 MHz, CDCl<sub>3</sub>)  $\delta$  = 149.1, 146.3, 143.7, 139.2, 128.8, 127.1, 119.0, 113.5, 108.6, 57.0, 46.4, 16.0.

**HRMS (ESI-TOF):** Calculated for C<sub>14</sub>H<sub>15</sub>N<sub>2</sub>O [M + H]<sup>+</sup>: 227.1179, found 227.1167.

**SFC:** Daicel Chiralcel OJ-H, column temperature = 40 °C, CO<sub>2</sub>/MeOH = 80/20, Flow rate = 2 mL/min, UV = 280 nm, t<sub>R</sub> = 4.3 min (major) and t<sub>R</sub> = 7.0 min (minor).

The absolute configuration was assigned by analogy.

**(S)-3-Methyl-5-(naphthalen-2-yl)-1-phenyl-4,5-dihydro-1H-pyrazole**

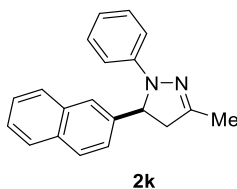

Following general procedure D (reaction performed at room temperature for 24 h), compound **2k** was obtained from phenylhydrazine (25  $\mu$ L, 0.25 mmol, 1 equiv) and (*E*)-4-(naphthalen-2-yl)but-3-en-2-one (52 mg, 0.26 mmol, 1.05 equiv) as a white solid in 97% yield (69 mg).

**Characterization data for 2k:**

**R<sub>f</sub>** = 0.25 in hexanes/EtOAc 90:10 v/v.

**mp** = 111–113 °C.

**[ $\alpha$ ]<sub>D</sub><sup>20</sup>** = –154.24 (c 0.5, CHCl<sub>3</sub>, 90% ee).

**<sup>1</sup>H NMR** (400 MHz, CDCl<sub>3</sub>)  $\delta$  = 7.88–7.75 (comp, 4H), 7.53–7.41 (comp, 3H), 7.18–7.09 (m, 2H), 6.99 (d, *J* = 8.2 Hz, 2H), 6.75 (t, *J* = 7.3 Hz, 1H), 5.18 (dd, *J* = 12.0, 8.2 Hz, 1H), 3.48 (dd, *J* = 17.6, 12.0 Hz, 1H), 2.79 (dd, *J* = 17.6, 8.2 Hz, 1H), 2.11 (s, 3H).

**<sup>13</sup>C NMR** (100 MHz, CDCl<sub>3</sub>)  $\delta$  = 148.6, 146.2, 140.4, 133.5, 132.8, 129.1, 128.9, 127.9, 127.7, 126.3, 125.9, 124.6, 124.0, 118.7, 113.2, 65.1, 47.8, 15.9.

**HRMS (ESI-TOF):** Calculated for C<sub>20</sub>H<sub>19</sub>N<sub>2</sub> [M + H]<sup>+</sup>: 287.1543, found 287.1534.

**SFC:** Daicel Chiralcel OJ-H, column temperature = 40 °C, CO<sub>2</sub>/MeOH = 95/5, Flow rate = 2 mL/min, UV = 230 nm, t<sub>R</sub> = 11.9 min (major) and t<sub>R</sub> = 13.3 min (minor).

The absolute configuration was assigned by analogy.

**(S)-1-(4-Methoxyphenyl)-3-methyl-5-phenyl-4,5-dihydro-1H-pyrazole**

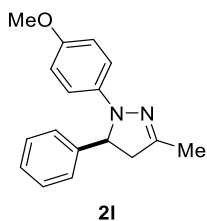

Following general procedure D (reaction performed at room temperature for 28 h), compound **21** was obtained from (4-methoxyphenyl)hydrazine (35 mg, 0.25 mmol, 1 equiv) and (*E*)-4-phenylbut-3-en-2-one (38 mg, 0.26 mmol, 1.05 equiv) as an off-white solid in 80% yield (53 mg).

**Characterization data for 21:**

**R<sub>f</sub>** = 0.37 in hexanes/EtOAc 85:15 v/v.

**mp** = 64–66 °C.

**[α]<sub>D</sub><sup>20</sup>** = –386.28 (c 0.5, CHCl<sub>3</sub>, 83% ee).

**<sup>1</sup>H NMR** (600 MHz, CDCl<sub>3</sub>) δ = 7.38–7.34 (comp, 4H), 7.31–7.26 (m, 1H), 6.92–6.88 (m, 2H), 6.77–6.73 (m, 2H), 4.90 (dd, *J* = 11.6, 9.5 Hz, 1H), 3.73 (s, 3H), 3.38 (dd, *J* = 17.3, 11.7 Hz, 1H), 2.74 (dd, *J* = 17.3, 9.5 Hz, 1H), 2.08 (s, 3H).

**<sup>13</sup>C NMR** (150 MHz, CDCl<sub>3</sub>) δ = 153.1, 148.4, 143.1, 141.1, 129.0, 127.4, 126.2, 114.9, 114.3, 66.4, 55.6, 48.0, 15.9.

**HRMS (ESI-TOF):** Calculated for C<sub>17</sub>H<sub>19</sub>N<sub>2</sub>O [M + H]<sup>+</sup>: 267.1492, found 267.1504.

**SFC:** Daicel Chiralcel OJ-H, column temperature = 40 °C, CO<sub>2</sub>/MeOH = 80/20, Flow rate = 2 mL/min, UV = 280 nm, t<sub>R</sub> = 5.0 min (major) and t<sub>R</sub> = 8.5 min (minor).

The absolute configuration was assigned by analogy.

**(S)-1-(3-Bromophenyl)-3-methyl-5-phenyl-4,5-dihydro-1H-pyrazole**

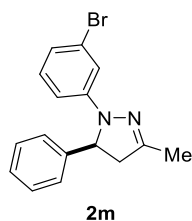

Following general procedure D (reaction performed at room temperature for 28 h), compound **2m** was obtained from (3-bromophenyl)hydrazine (47 mg, 0.25 mmol, 1 equiv) and (*E*)-4-phenylbut-3-en-2-one (38 mg, 0.26 mmol, 1.05 equiv) as a white solid in 83% yield (65 mg).

**Characterization data for 2m:**

**R<sub>f</sub>** = 0.41 in hexanes/EtOAc 90:10 v/v.

**mp** = 99–101 °C.

**[α]<sub>D</sub><sup>20</sup>** = –221.08 (c 0.5, CHCl<sub>3</sub>, 90% ee).

**<sup>1</sup>H NMR** (400 MHz, CDCl<sub>3</sub>) δ = 7.38–7.31 (m, 2H), 7.31–7.22 (comp, 4H), 6.94 (t, *J* = 8.1 Hz, 1H), 6.87–6.81 (m, 1H), 6.71–6.64 (m, 1H), 5.00 (dd, *J* = 11.9, 7.4 Hz, 1H), 3.49–3.36 (m, 1H), 2.77–2.67 (m, 1H), 2.07 (s, 3H).

**<sup>13</sup>C NMR** (100 MHz, CDCl<sub>3</sub>) δ = 149.3, 146.8, 142.3, 130.0, 129.1, 127.5, 125.7, 122.9, 121.1, 115.9, 111.1, 64.2, 47.8, 15.8.

**HRMS (ESI-TOF):** Calculated for C<sub>16</sub>H<sub>15</sub>BrN<sub>2</sub> [M]<sup>+</sup>: 314.0419, found 314.0400.

**SFC:** Daicel Chiralcel OJ-H, column temperature = 40 °C, CO<sub>2</sub>/MeOH = 90/10, Flow rate = 2 mL/min, UV = 280 nm, t<sub>R</sub> = 4.7 min (major) and t<sub>R</sub> = 8.2 min (minor).

The absolute configuration was assigned by analogy.



**(S)-3-Methyl-5-phenyl-1-(4-(trifluoromethyl)phenyl)-4,5-dihydro-1H-pyrazole**

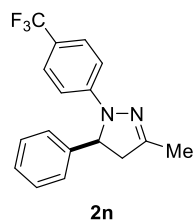

Following general procedure D (reaction performed at room temperature for 28 h), compound **2n** was obtained from (4-(trifluoromethyl)phenyl)hydrazine (44 mg, 0.25 mmol, 1 equiv) and (*E*)-4-phenylbut-3-en-2-one (38 mg, 0.26 mmol, 1.05 equiv) as a white solid in 85% yield (65 mg).

**Characterization data for 2n:**

**R<sub>f</sub>** = 0.35 in hexanes/EtOAc 90:10 v/v.

**mp** = 106–108 °C.

**[α]<sub>D</sub><sup>20</sup>** = –356.06 (c 0.5, CHCl<sub>3</sub>, 87% ee).

**<sup>1</sup>H NMR** (400 MHz, CDCl<sub>3</sub>) δ = 7.38–7.32 (comp, 4H), 7.30–7.22 (comp, 3H), 6.93 (d, *J* = 8.7 Hz, 2H), 5.09 (dd, *J* = 12.0, 6.9 Hz, 1H), 3.52–3.43 (m, 1H), 2.80–2.72 (m, 1H), 2.09 (s, 3H).

**<sup>13</sup>C NMR** (100 MHz, CDCl<sub>3</sub>) δ = 145.0, 147.6, 142.0, 129.2, 127.7, 126.2 (q, *J*<sub>C-F</sub> = 3.6 Hz), 125.6, 124.9 (q, *J*<sub>C-F</sub> = 270.7 Hz), 119.6 (q, *J*<sub>C-F</sub> = 32.3 Hz), 112.0, 63.7, 47.8, 15.9.

**<sup>19</sup>F-NMR** (377 MHz, CDCl<sub>3</sub>): δ = –62.44.

**HRMS (ESI-TOF):** Calculated for C<sub>17</sub>H<sub>16</sub>F<sub>3</sub>N<sub>2</sub> [M + H]<sup>+</sup>: 305.1260, found 305.1272.

**SFC:** Daicel Chiralcel OJ-H, column temperature = 40 °C, CO<sub>2</sub>/MeOH = 80/20, Flow rate = 2 mL/min, UV = 280 nm, t<sub>R</sub> = 2.9 min (major) and t<sub>R</sub> = 3.9 min (minor).

The absolute configuration was assigned by analogy.

**(S)-3-Ethyl-1,5-diphenyl-4,5-dihydro-1H-pyrazole**

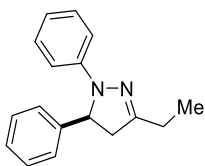

**2o**

Following general procedure D (reaction performed at room temperature for 28 h), compound **2o** was obtained from phenylhydrazine (25  $\mu$ L, 0.25 mmol, 1 equiv) and (*E*)-1-phenylpent-1-en-3-one (42 mg, 0.26 mmol, 1.05 equiv) as a white solid in 91% yield (57 mg).

**Characterization data for 2o:**

**R<sub>f</sub>** = 0.38 in hexanes/EtOAc 90:10 v/v.

**mp** = 66–68 °C.

**[ $\alpha$ ]<sub>D</sub><sup>20</sup>** = –288.32 (c 0.5, CHCl<sub>3</sub>, 88% ee).

**<sup>1</sup>H NMR** (400 MHz, CDCl<sub>3</sub>)  $\delta$  = 7.38–7.29 (comp, 4H), 7.29–7.23 (m, 1H), 7.19–7.10 (m, 2H), 6.95 (d, *J* = 8.1 Hz, 2H), 6.74 (t, *J* = 7.3 Hz, 1H), 5.00 (dd, *J* = 11.9, 8.1 Hz, 1H), 3.43 (dd, *J* = 17.4, 11.9 Hz, 1H), 2.73 (dd, *J* = 17.4, 8.1 Hz, 1H), 2.42 (q, *J* = 7.5 Hz, 2H), 1.21 (t, *J* = 7.5 Hz, 3H).

**<sup>13</sup>C NMR** (100 MHz, CDCl<sub>3</sub>)  $\delta$  = 153.1, 146.2, 143.1, 129.0, 128.8, 127.3, 125.9, 118.6, 113.1, 64.6, 46.0, 23.6, 11.2.

**HRMS (ESI-TOF):** Calculated for C<sub>17</sub>H<sub>19</sub>N<sub>2</sub> [M + H]<sup>+</sup>: 251.1543, found 251.1554.

**SFC:** Daicel Chiralcel OJ-H, column temperature = 40 °C, CO<sub>2</sub>/MeOH = 80/20, Flow rate = 2 mL/min, UV = 280 nm, t<sub>R</sub> = 5.4 min (major) and t<sub>R</sub> = 6.7 min (minor).

The absolute configuration was assigned by analogy.

**(S)-3-Butyl-1,5-diphenyl-4,5-dihydro-1H-pyrazole**

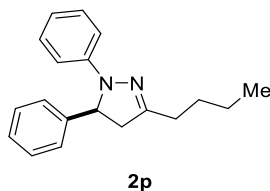

Following general procedure D (reaction performed at room temperature for 28 h), compound **2p** was obtained from phenylhydrazine (25  $\mu$ L, 0.25 mmol, 1 equiv) and (*E*)-1-phenylhept-1-en-3-one (49 mg, 0.26 mmol, 1.05 equiv) as a white solid in 91% yield (63 mg).

**Characterization data for 2p:**

**R<sub>f</sub>** = 0.51 in hexanes/EtOAc 90:10 v/v.

**mp** = 68–70 °C.

**[ $\alpha$ ]<sub>D</sub><sup>20</sup>** = –298.57 (c 1.0, CH<sub>2</sub>Cl<sub>2</sub>, 90% ee).

**<sup>1</sup>H NMR** (400 MHz, CDCl<sub>3</sub>)  $\delta$  = 7.29–7.14 (comp, 5H), 7.10–7.01 (m, 2H), 6.85 (d, *J* = 8.1 Hz, 2H), 6.65 (t, *J* = 7.3 Hz, 1H), 4.91 (dd, *J* = 11.9, 8.0 Hz, 1H), 3.33 (dd, *J* = 17.4, 11.9 Hz, 1H), 2.63 (dd, *J* = 17.4, 8.0 Hz, 1H), 2.32 (t, *J* = 7.7 Hz, 2H), 1.55–1.45 (m, 2H), 1.38–1.26 (m, 2H), 0.86 (t, *J* = 7.3 Hz, 3H).

**<sup>13</sup>C NMR** (100 MHz, CDCl<sub>3</sub>)  $\delta$  = 152.2, 146.2, 143.1, 129.0, 128.8, 127.3, 125.9, 118.5, 113.1, 64.5, 46.2, 29.9, 28.9, 22.5, 13.8.

**HRMS (ESI-TOF):** Calculated for C<sub>19</sub>H<sub>22</sub>N<sub>2</sub> [M]<sup>+</sup>: 278.1783, found 278.1772.

**SFC:** Daicel Chiralcel OJ-H, column temperature = 40 °C, CO<sub>2</sub>/MeOH = 90/10, Flow rate = 2 mL/min, UV = 280 nm, t<sub>R</sub> = 8.7 min (major) and t<sub>R</sub> = 9.8 min (minor).

The absolute configuration of (*S*)-**2p** ([ $\alpha$ ]<sub>D</sub><sup>20</sup> = –298.57 (c 1.0, CH<sub>2</sub>Cl<sub>2</sub>, 90% ee)) was assigned by comparison with the (*R*)-enantiomer reported in the literature ([ $\alpha$ ]<sub>D</sub><sup>23</sup> = +336.02 (c 1.0, CH<sub>2</sub>Cl<sub>2</sub>, 94% ee)).<sup>3</sup>

**(S)-3-Isopropyl-1,5-diphenyl-4,5-dihydro-1H-pyrazole**

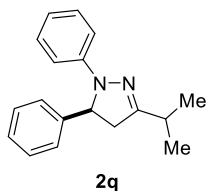

Following general procedure D (reaction performed at room temperature for 28 h), compound **2q** was obtained from phenylhydrazine (25  $\mu$ L, 0.25 mmol, 1 equiv) and (*E*)-4-methyl-1-phenylpent-1-en-3-one (46 mg, 0.26 mmol, 1.05 equiv) as a white solid in 89% yield (59 mg).

**Characterization data for 2q:**

**R<sub>f</sub>** = 0.37 in hexanes/EtOAc 90:10 v/v.

**mp** = 90–92 °C.

**[ $\alpha$ ]<sub>D</sub><sup>20</sup>** = –196.5 (c 0.5, CHCl<sub>3</sub>, 82% ee).

**<sup>1</sup>H NMR** (400 MHz, CDCl<sub>3</sub>)  $\delta$  = 7.31–7.17 (comp, 6H), 7.11–7.05 (m, 2H), 6.88 (d, *J* = 8.1 Hz, 2H), 6.68 (t, *J* = 7.3 Hz, 1H), 4.93 (dd, *J* = 11.9, 8.1 Hz, 1H), 3.37 (dd, *J* = 17.4, 11.9 Hz, 1H), 2.74–2.61 (comp, 2H), 1.15 (d, *J* = 1.4 Hz, 3H), 1.13 (d, *J* = 1.4 Hz, 3H).

**<sup>13</sup>C NMR** (100 MHz, CDCl<sub>3</sub>)  $\delta$  = 156.5, 146.3, 143.2, 129.0, 128.8, 127.3, 125.9, 118.5, 113.2, 64.7, 44.0, 29.7, 20.3.

**HRMS (ESI-TOF):** Calculated for C<sub>18</sub>H<sub>21</sub>N<sub>2</sub> [M + H]<sup>+</sup>: 265.1699, found 265.1727.

**SFC:** Daicel Chiralcel OJ-H, column temperature = 40 °C, CO<sub>2</sub>/MeOH = 98/2, Flow rate = 2 mL/min, UV = 280 nm, t<sub>R</sub> = 4.0 min (major) and t<sub>R</sub> = 4.3 min (minor).

The absolute configuration was assigned by analogy.

**(S)-3-(*Tert*-butyl)-1,5-diphenyl-4,5-dihydro-1*H*-pyrazole**

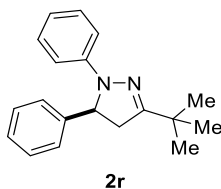

Following general procedure D (reaction performed at room temperature for 28 h), compound **2r** was obtained from phenylhydrazine (25  $\mu$ L, 0.25 mmol, 1 equiv) and (*E*)-4,4-dimethyl-1-phenylpent-1-en-3-one (49 mg, 0.26 mmol, 1.05 equiv) as a colorless oil in 86% yield (60 mg).

**Characterization data for 2r:**

**R<sub>f</sub>** = 0.51 in hexanes/EtOAc 90:10 v/v.

**[ $\alpha$ ]<sub>D</sub><sup>20</sup>** = -171.18 (c 0.5, CHCl<sub>3</sub>, 69% ee).

**<sup>1</sup>H NMR** (600 MHz, CDCl<sub>3</sub>)  $\delta$  = 7.39–7.31 (comp, 4H), 7.30–7.26 (m, 1H), 7.19–7.14 (m, 2H), 7.01–6.96 (m, 2H), 6.79–6.73 (m, 1H), 5.01 (dd, *J* = 11.8, 8.1 Hz, 1H), 3.49 (dd, *J* = 17.2, 11.8 Hz, 1H), 2.78 (dd, *J* = 17.2, 8.1 Hz, 1H), 1.26 (s, 9H).

**<sup>13</sup>C NMR** (150 MHz, CDCl<sub>3</sub>)  $\delta$  = 158.7, 146.4, 143.2, 129.0, 128.8, 127.3, 125.9, 118.5, 113.2, 65.1, 43.2, 33.8, 28.3.

**HRMS (ESI-TOF):** Calculated for C<sub>19</sub>H<sub>22</sub>N<sub>2</sub> [M]<sup>+</sup>: 278.1783 found 278.1788.

**SFC:** Daicel Chiralcel OD-H, column temperature = 40 °C, CO<sub>2</sub>/MeOH = 95/5, Flow rate = 2 mL/min, UV = 280 nm, t<sub>R</sub> = 8.8 min (major) and t<sub>R</sub> = 9.7 min (minor).

The absolute configuration was assigned by analogy.

**(S)-3-(*Tert*-butyl)-1-(3-chlorophenyl)-5-(4-fluoro-3-methoxyphenyl)-4,5-dihydro-1*H*-pyrazole**

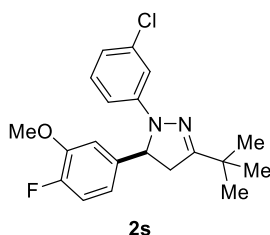

Following general procedure D (reaction performed at room temperature for 28 h), compound **2s** was obtained from (3-chlorophenyl)hydrazine (36 mg, 0.25 mmol, 1 equiv) and (*E*)-1-(4-fluoro-3-methoxyphenyl)-4,4-dimethylpent-1-en-3-one (62 mg, 0.26 mmol, 1.05 equiv) as a white solid in 88% yield (79 mg).

**Characterization data for 2s:**

**R<sub>f</sub>** = 0.34 in hexanes/EtOAc 80:20 v/v.

**mp** = 125–127 °C

**[α]<sub>D</sub><sup>20</sup>** = –314.22 (c 0.5, CHCl<sub>3</sub>, 72% ee).

**<sup>1</sup>H NMR** (600 MHz, CDCl<sub>3</sub>) δ = 7.07–6.99 (comp, 3H), 6.85–6.76 (comp, 2H), 6.73–6.64 (comp, 2H), 4.93 (dd, *J* = 11.7, 7.4 Hz, 1H), 3.83 (s, 3H), 3.46 (dd, *J* = 17.3, 11.7 Hz, 1H), 2.73 (dd, *J* = 17.3, 7.4 Hz, 1H), 1.23 (s, 9H).

**<sup>13</sup>C NMR** (150 MHz, CDCl<sub>3</sub>) δ = 159.8, 151.7 (d, *J*<sub>C-F</sub> = 246.0 Hz), 148.3 (d, *J*<sub>C-F</sub> = 10.5 Hz), 147.1, 138.87 (d, *J*<sub>C-F</sub> = 3.9 Hz), 134.6, 129.8, 118.5, 117.9 (d, *J*<sub>C-F</sub> = 7.2 Hz), 116.5 (d, *J*<sub>C-F</sub> = 18.2 Hz), 113.3, 111.0, 110.5 (d, *J*<sub>C-F</sub> = 2.2 Hz), 64.4, 56.3, 43.2, 33.9, 28.2.

**<sup>19</sup>F-NMR** (377 MHz, CDCl<sub>3</sub>): δ = –136.70.

**HRMS (ESI-TOF):** Calculated for C<sub>20</sub>H<sub>23</sub>ClFN<sub>2</sub>O [M + H]<sup>+</sup>: 361.1477, found 361.1458.

**SFC:** Daicel Chiralcel OJ-H, column temperature = 40 °C, CO<sub>2</sub>/MeOH = 98/2, Flow rate = 2 mL/min, UV = 280 nm, t<sub>R</sub> = 4.8 min (major) and t<sub>R</sub> = 5.2 min (minor).

The absolute configuration was assigned by analogy.

**(S)-5-(3-(*Tert*-butyl)-1-(3-chlorophenyl)-4,5-dihydro-1*H*-pyrazol-5-yl)-2-fluorophenol**

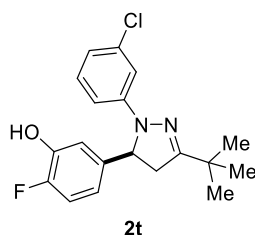

Following general procedure D (reaction performed at room temperature for 28 h), compound **2t** was obtained from (3-chlorophenyl)hydrazine (36 mg, 0.25 mmol, 1 equiv) and (*E*)-1-(4-fluoro-3-hydroxyphenyl)-4,4-dimethylpent-1-en-3-one (58 mg, 0.26 mmol, 1.05 equiv) as a white solid in 92% yield (80 mg).

**Characterization data for 2t:**

**R<sub>f</sub>** = 0.22 in hexanes/EtOAc 60:40 v/v.

**mp** = 109–111 °C

**[α]<sub>D</sub><sup>20</sup>** = –155.18 (c 0.5, CHCl<sub>3</sub>, 61% ee).

**<sup>1</sup>H NMR** (600 MHz, CDCl<sub>3</sub>) δ = 7.07–6.98 (comp, 3H), 6.93–6.87 (m, 1H), 6.78–6.72 (m, 1H), 6.71–6.63 (comp, 2H), 5.26 (s, 1H), 4.91 (dd, *J* = 11.8, 7.2 Hz, 1H), 3.44 (dd, *J* = 17.4, 11.8 Hz, 1H), 2.71 (dd, *J* = 17.4, 7.2 Hz, 1H), 1.22 (s, 9H).

**<sup>13</sup>C NMR** (150 MHz, CDCl<sub>3</sub>) δ = 159.6, 150.3 (d, *J*<sub>C-F</sub> = 237.2 Hz), 146.9, 144.0 (d, *J*<sub>C-F</sub> = 14.4 Hz), 139.5 (d, *J*<sub>C-F</sub> = 3.3 Hz), 134.6, 129.8, 118.3, 117.9 (d, *J*<sub>C-F</sub> = 6.6 Hz), 116.1 (d, *J*<sub>C-F</sub> = 18.2 Hz), 114.5 (d, *J*<sub>C-F</sub> = 1.6 Hz), 113.2, 110.9, 63.8, 43.1, 33.8, 28.2.

**<sup>19</sup>F-NMR** (377 MHz, CDCl<sub>3</sub>): δ = –142.14.

**HRMS (ESI-TOF):** Calculated for C<sub>19</sub>H<sub>21</sub>ClFN<sub>2</sub>O [M + H]<sup>+</sup>: 347.1321, found 347.1311.

**SFC:** Daicel Chiralcel OJ-H, column temperature = 40 °C, CO<sub>2</sub>/MeOH = 90/10, Flow rate = 2 mL/min, UV = 280 nm, t<sub>R</sub> = 9.6 min (major) and t<sub>R</sub> = 11.0 min (minor).

The absolute configuration was assigned by analogy.

### Dimethyl (*R*)-2-(2-nitro-1-phenylethyl)malonate

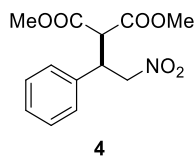

To a flame dried vial were successively added dimethyl malonate (0.5 mmol, 2 equiv), catalyst **5b** (10.3 mg, 0.025 mmol, 10 mol%), and dry toluene (2.5 mL, 0.1 M). Trans- $\beta$ -nitrostyrene (0.25 mmol, 1 equiv) was then added, and the resulting mixture was stirred under nitrogen at room temperature for 6 h. The resulting mixture was directly purified by flash chromatography on silica gel using EtOAc/hexanes (20/80) as the eluent to afford **4** as a colorless oil in 95% yield (67 mg).

#### Characterization data for **4**:

$R_f$  = 0.2 in hexanes/EtOAc 80:20 v/v.

$[\alpha]_D^{20} = -5.03$  (c 1.0, CHCl<sub>3</sub>, 94% ee).

<sup>1</sup>H NMR (400 MHz, CDCl<sub>3</sub>)  $\delta$  = 7.28–7.13 (comp, 5H), 4.89–4.76 (comp, 2H), 4.17 (td,  $J$  = 9.0, 5.2 Hz, 1H), 3.79 (d,  $J$  = 9.0 Hz, 1H), 3.68 (s, 3H), 3.48 (s, 3H).

<sup>13</sup>C NMR (100 MHz, CDCl<sub>3</sub>)  $\delta$  = 167.8, 167.2, 136.1, 129.0, 128.4, 127.8, 77.3, 54.7, 53.0, 52.8, 42.9.

**HRMS (ESI-TOF)**: Calculated for C<sub>13</sub>H<sub>15</sub>NO<sub>6</sub>Na [M + Na]<sup>+</sup>: 304.0792, found 304.0796.

**SFC**: Daicel Chiralcel AD-H, column temperature = 40 °C, CO<sub>2</sub>/MeOH = 90/10, Flow rate = 2 mL/min, UV = 230 nm,  $t_R$  = 3.3 min (major) and  $t_R$  = 2.9 min (minor).

The absolute configuration of **8a** ( $[\alpha]_D^{20} = -5.03$  (c 1.0, CHCl<sub>3</sub>, 94% ee)) was assigned by comparison with the compound reported in the literature ( $[\alpha]_D^{23} = -6.02$  (c 1.0, CHCl<sub>3</sub>, 97% ee)).<sup>4</sup>



## References

- 1 X. Liu, X. Xu, L. Pan, Q. Zhang and Q. Liu, *Org. Biomol. Chem.*, 2013, **11**, 6703-6706.
- 2 Y.-D. Yang, E. Tokunaga, H. Akiyama, N. Saito and N. Shibata, *ChemMedChem*, 2014, **9**, 913-917.
- 3 D.-Y. Zhang, L. Shao, J. Xu and X.-P. Hu, *ACS Catal.*, 2015, **5**, 5026-5030.
- 4 L. Zhang, M.-M. Lee, S.-M. Lee, J. Lee, M. Cheng, B.-S. Jeong, H.-g. Park and S.-s. Jew, *Adv. Synth. Catal.*, 2009, **351**, 3063-3066.

## SFC Profiles

### SFC Profile of **2a**

Conditions: Daicel Chiralcel OJ-H, column temperature = 40 °C, CO<sub>2</sub>/MeOH = 80/20, Flow rate = 2 mL/min, UV = 254 nm, t<sub>R</sub> = 3.9 min (major) and t<sub>R</sub> = 5.2 min (minor).

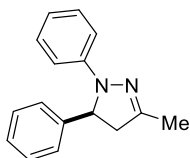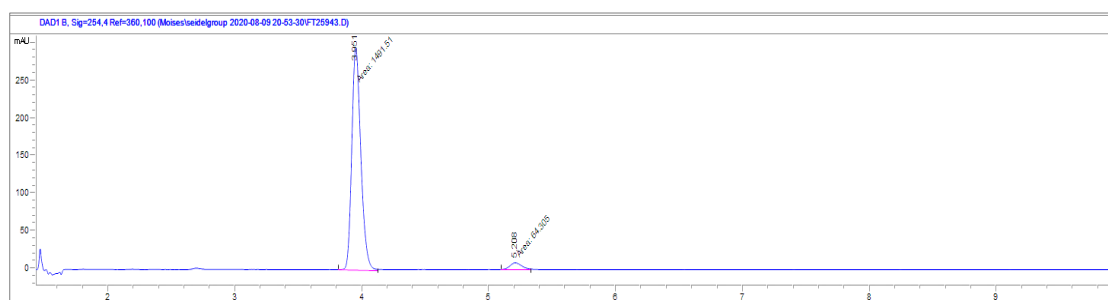

| Peak | Retention time (min) | Area % |
|------|----------------------|--------|
| 1    | 3.951                | 95.867 |
| 2    | 5.208                | 4.133  |

### Racemic sample

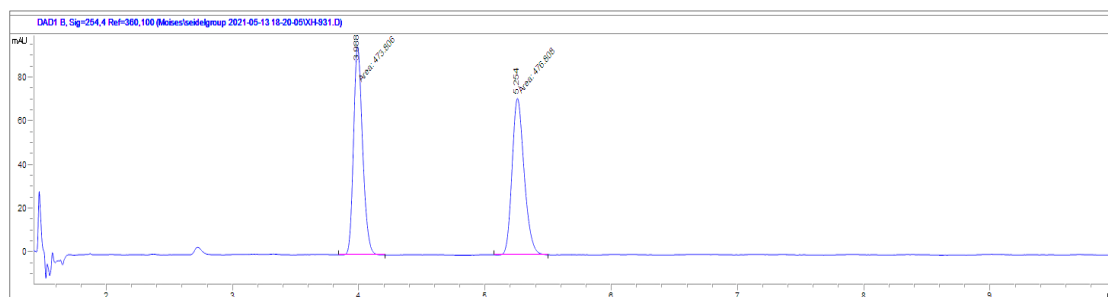

| Peak | Retention time (min) | Area % |
|------|----------------------|--------|
| 1    | 3.988                | 50.085 |
| 2    | 5.254                | 49.915 |

## SFC Profile of **2b**

Conditions: Daicel Chiralcel OJ-H, column temperature = 40 °C, CO<sub>2</sub>/MeOH = 90/10, Flow rate = 2 mL/min, UV = 280 nm, t<sub>R</sub> = 3.1 min (major) and t<sub>R</sub> = 5.1 min (minor).

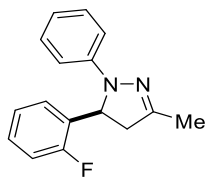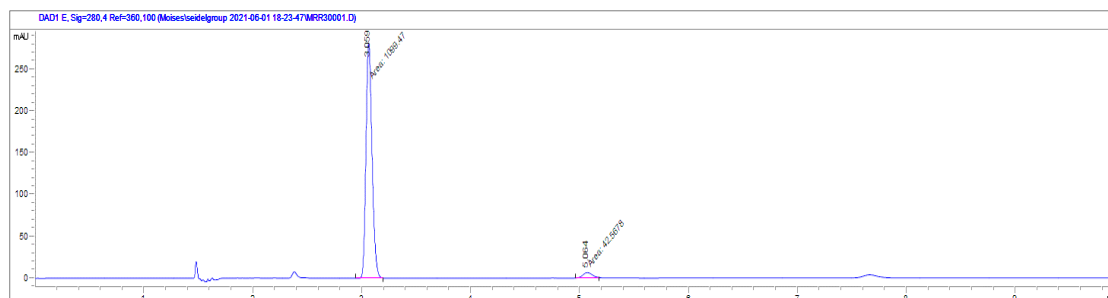

| Peak | Retention time (min) | Area % |
|------|----------------------|--------|
| 1    | 3.059                | 96.273 |
| 2    | 5.064                | 3.727  |

## Racemic sample

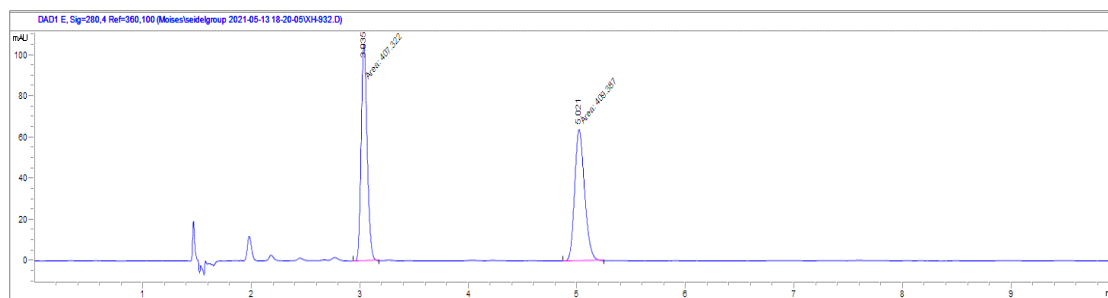

| Peak | Retention time (min) | Area % |
|------|----------------------|--------|
| 1    | 3.035                | 49.874 |
| 2    | 5.021                | 50.126 |

## SFC Profile of **2c**

Conditions: Daicel Chiralcel OJ-H, column temperature = 40 °C, CO<sub>2</sub>/MeOH = 90/10, Flow rate = 2 mL/min, UV = 280 nm, t<sub>R</sub> = 9.4 min (major) and t<sub>R</sub> = 7.1 min (minor).

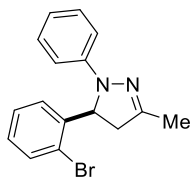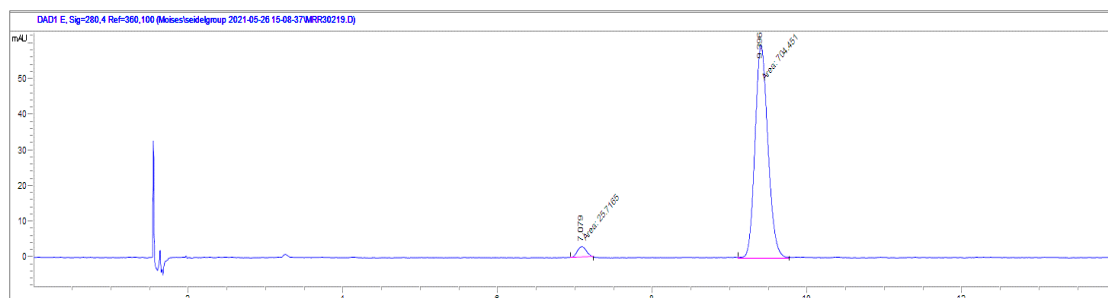

| Peak | Retention time (min) | Area % |
|------|----------------------|--------|
| 1    | 7.079                | 3.522  |
| 2    | 9.396                | 96.478 |

## Racemic sample

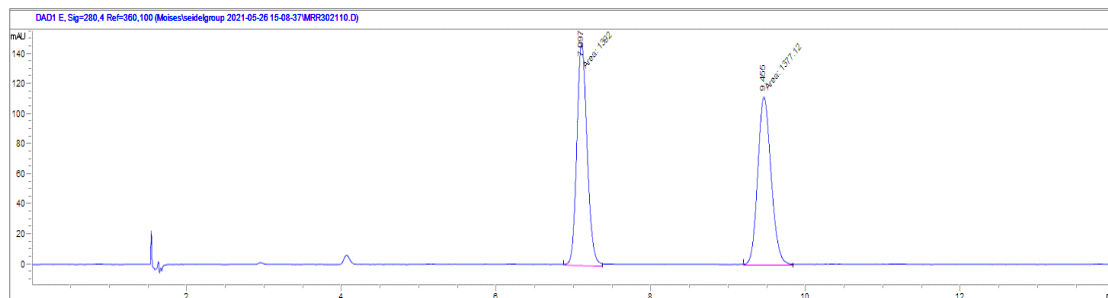

| Peak | Retention time (min) | Area % |
|------|----------------------|--------|
| 1    | 7.097                | 50.169 |
| 2    | 9.455                | 49.831 |

## SFC Profile of **2d**

Conditions: Daicel Chiralcel OJ-H, column temperature = 40 °C, CO<sub>2</sub>/MeOH = 80/20, Flow rate = 2 mL/min, UV = 280 nm, t<sub>R</sub> = 7.8 min (major) and t<sub>R</sub> = 8.5 min (minor).

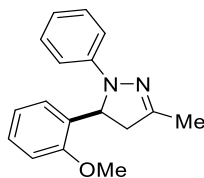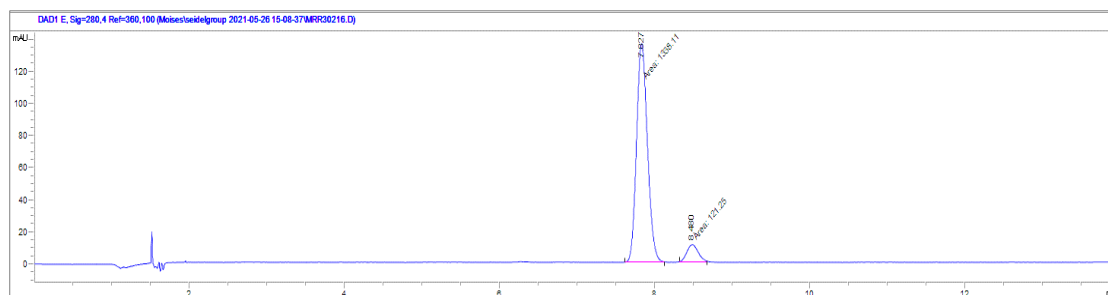

| Peak | Retention time (min) | Area % |
|------|----------------------|--------|
| 1    | 7.827                | 91.692 |
| 2    | 8.480                | 8.308  |

## Racemic sample

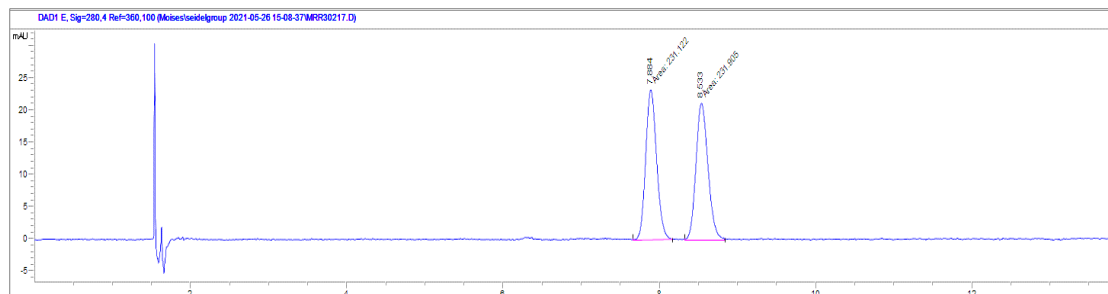

| Peak | Retention time (min) | Area % |
|------|----------------------|--------|
| 1    | 7.884                | 49.915 |
| 2    | 8.533                | 50.085 |

## SFC Profile of **2e**

Conditions: Daicel Chiralcel OJ-H, column temperature = 40 °C, CO<sub>2</sub>/MeOH = 80/20, Flow rate = 2 mL/min, UV = 280 nm, t<sub>R</sub> = 4.1 min (major) and t<sub>R</sub> = 6.1 min (minor).

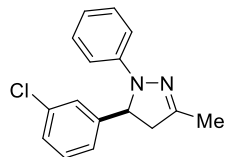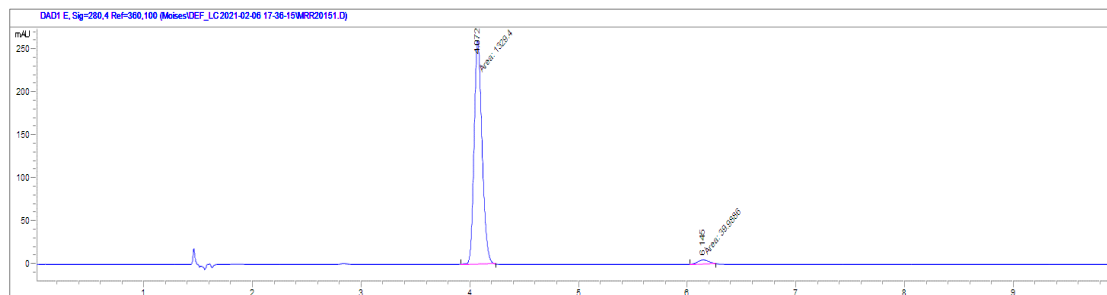

| Peak | Retention time (min) | Area % |
|------|----------------------|--------|
| 1    | 4.072                | 97.080 |
| 2    | 6.145                | 2.9200 |

## Racemic sample

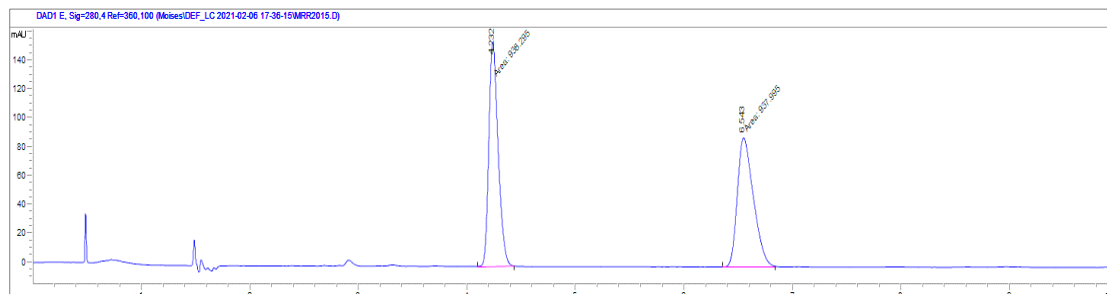

| Peak | Retention time (min) | Area % |
|------|----------------------|--------|
| 1    | 4.232                | 50.008 |
| 2    | 6.543                | 49.992 |

## SFC Profile of **2f**

Conditions: Daicel Chiralcel OJ-H, column temperature = 40 °C, CO<sub>2</sub>/MeOH = 90/10, Flow rate = 2 mL/min, UV = 280 nm, t<sub>R</sub> = 4.1 min (major) and t<sub>R</sub> = 5.1 min (minor).

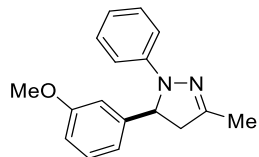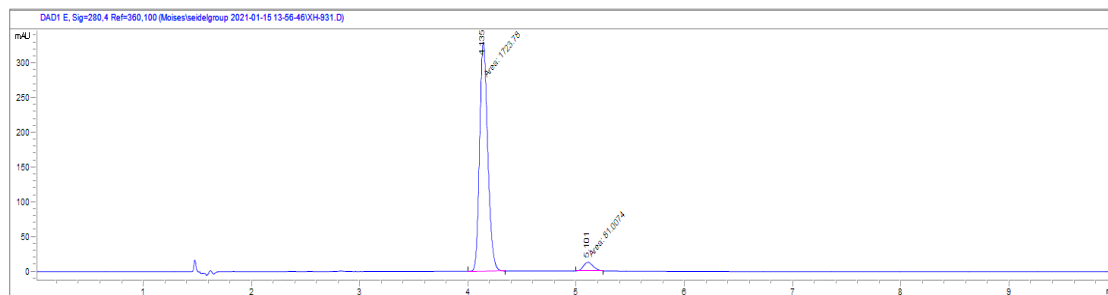

| Peak | Retention time (min) | Area % |
|------|----------------------|--------|
| 1    | 4.135                | 95.512 |
| 2    | 5.101                | 4.488  |

## Racemic sample

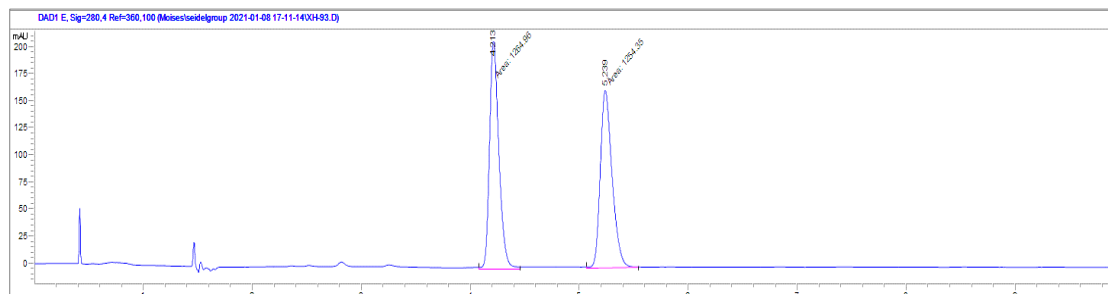

| Peak | Retention time (min) | Area % |
|------|----------------------|--------|
| 1    | 4.213                | 50.211 |
| 2    | 5.230                | 49.789 |

## SFC Profile of **2g**

Conditions: Daicel Chiralcel OJ-H, column temperature = 40 °C, CO<sub>2</sub>/MeOH = 90/10, Flow rate = 2 mL/min, UV = 280 nm, t<sub>R</sub> = 4.1 min (major) and t<sub>R</sub> = 6.3 min (minor).

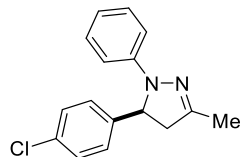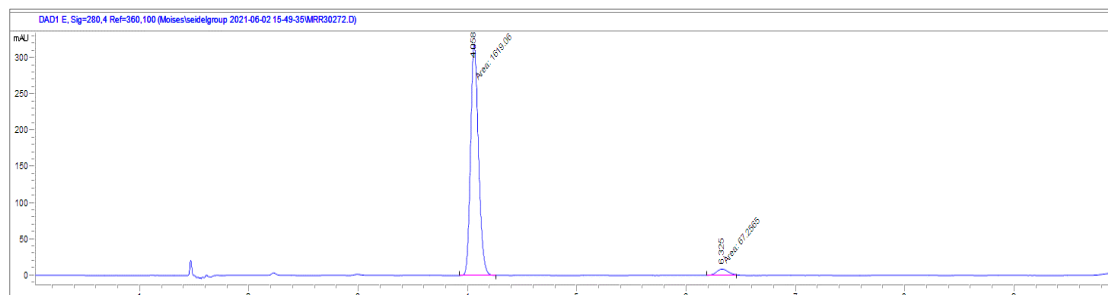

| Peak | Retention time (min) | Area % |
|------|----------------------|--------|
| 1    | 4.058                | 96.012 |
| 2    | 6.325                | 3.988  |

## Racemic sample

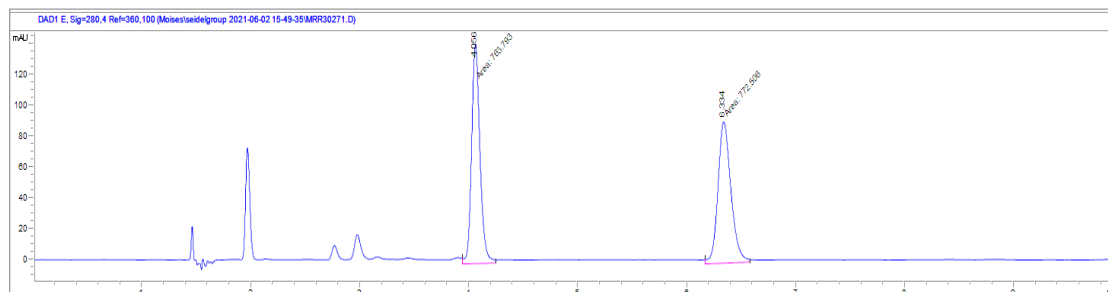

| Peak | Retention time (min) | Area % |
|------|----------------------|--------|
| 1    | 4.056                | 49.716 |
| 2    | 6.334                | 50.284 |



## SFC Profile of **2h**

Conditions: Daicel Chiralcel OJ-H, column temperature = 40 °C, CO<sub>2</sub>/MeOH = 97/3, Flow rate = 2 mL/min, UV = 280 nm, t<sub>R</sub> = 2.8 min (major) and t<sub>R</sub> = 4.6 min (minor).

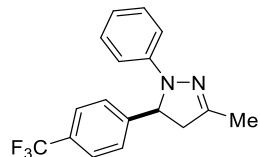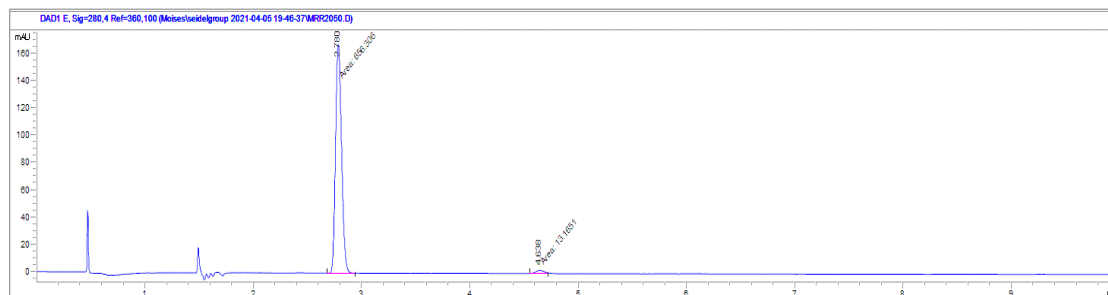

| Peak | Retention time (min) | Area % |
|------|----------------------|--------|
| 1    | 2.78                 | 98.034 |
| 2    | 4.638                | 1.966  |

## Racemic sample

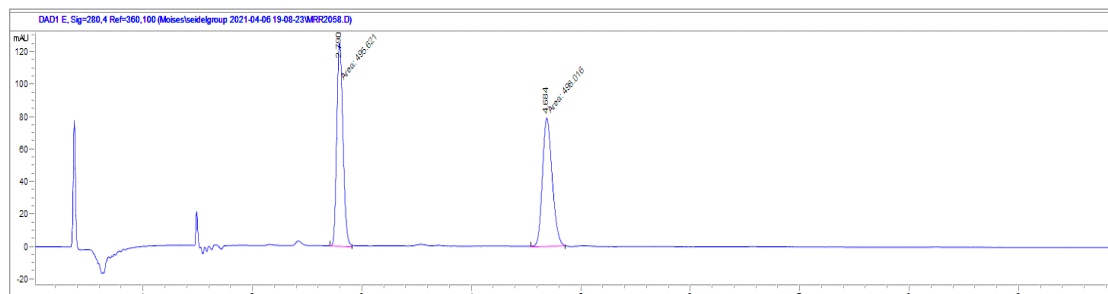

| Peak | Retention time (min) | Area % |
|------|----------------------|--------|
| 1    | 2.79                 | 49.879 |
| 2    | 4.684                | 50.121 |

## SFC Profile of **2i**

Conditions: Daicel Chiralcel OJ-H, column temperature = 40 °C, CO<sub>2</sub>/MeOH = 90/10, Flow rate = 2 mL/min, UV = 280 nm, t<sub>R</sub> = 3.4 min (major) and t<sub>R</sub> = 4.6 min (minor).

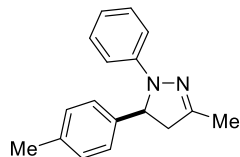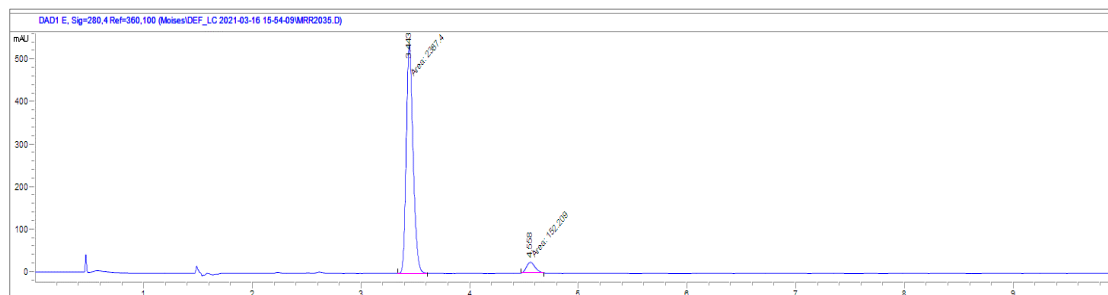

| Peak | Retention time (min) | Area % |
|------|----------------------|--------|
| 1    | 3.443                | 94.007 |
| 2    | 4.558                | 5.993  |

## Racemic sample

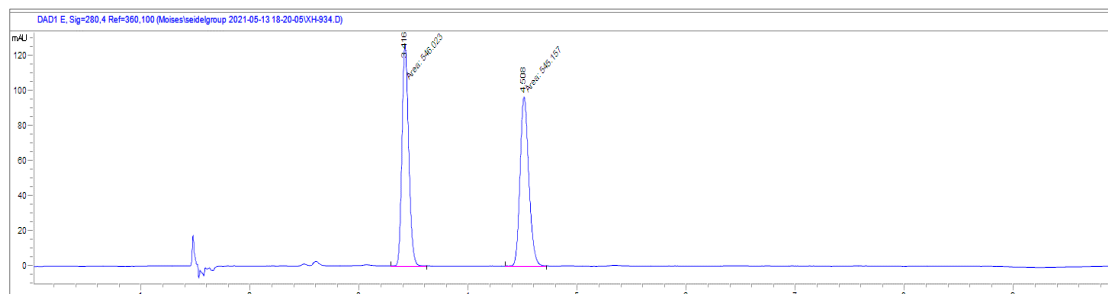

| Peak | Retention time (min) | Area % |
|------|----------------------|--------|
| 1    | 3.416                | 50.040 |
| 2    | 4.508                | 49.960 |

## SFC Profile of **2j**

Conditions: Daicel Chiralcel OJ-H, column temperature = 40 °C, CO<sub>2</sub>/MeOH = 80/20, Flow rate = 2 mL/min, UV = 280 nm, t<sub>R</sub> = 4.3 min (major) and t<sub>R</sub> = 7.0 min (minor).

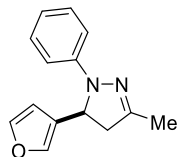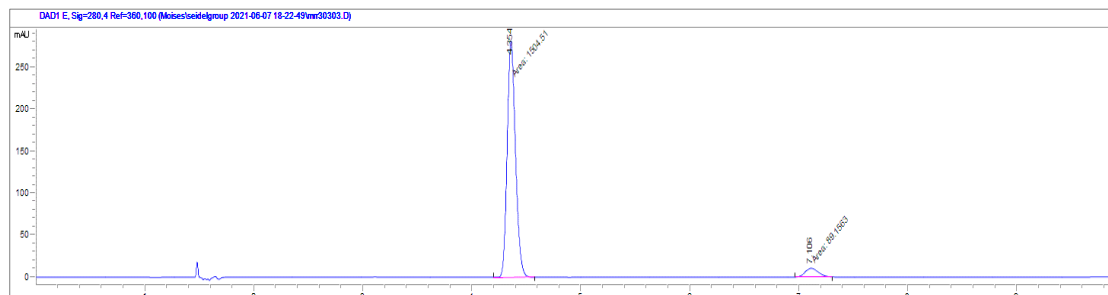

| Peak | Retention time (min) | Area % |
|------|----------------------|--------|
| 1    | 4.354                | 94.406 |
| 2    | 7.016                | 5.594  |

## Racemic sample

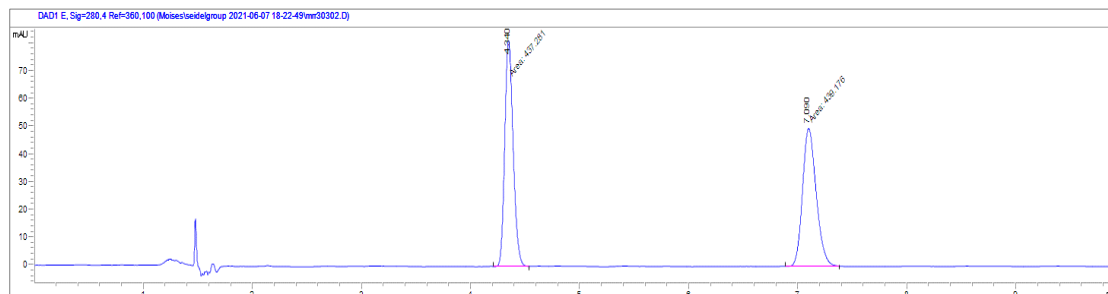

| Peak | Retention time (min) | Area % |
|------|----------------------|--------|
| 1    | 4.34                 | 49.892 |
| 2    | 7.09                 | 50.108 |

## SFC Profile of **2k**

Conditions: Daicel Chiralcel OJ-H, column temperature = 40 °C, CO<sub>2</sub>/MeOH = 95/5, Flow rate = 2 mL/min, UV = 230 nm, t<sub>R</sub> = 11.9 min (major) and t<sub>R</sub> = 13.3 min (minor).

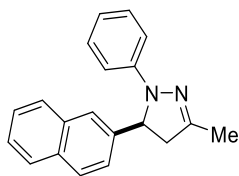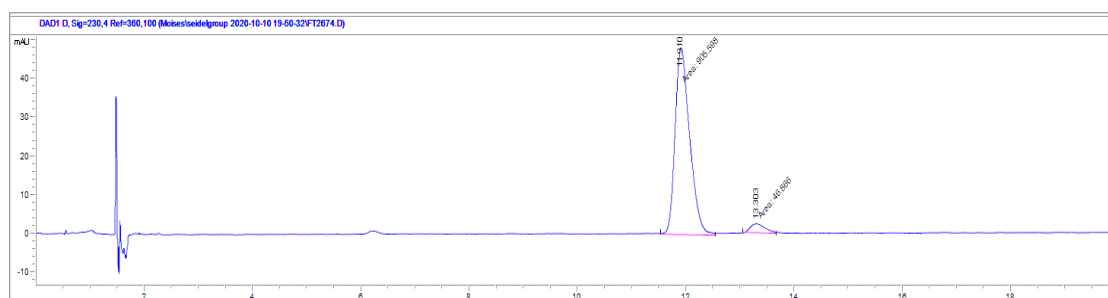

| Peak | Retention time (min) | Area % |
|------|----------------------|--------|
| 1    | 11.91                | 95.080 |
| 2    | 13.303               | 4.920  |

## Racemic sample

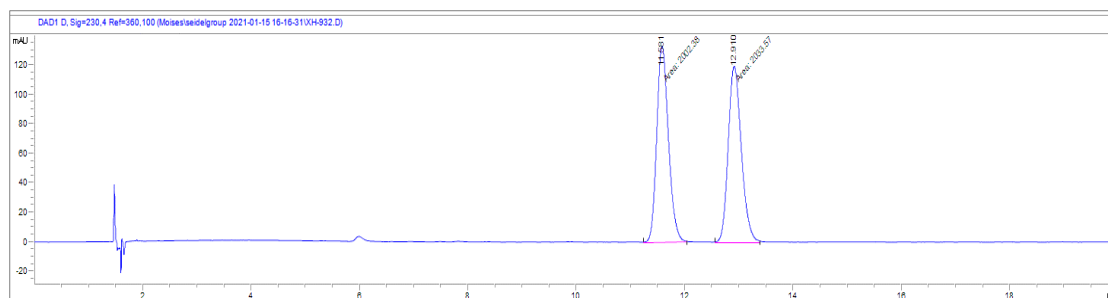

| Peak | Retention time (min) | Area % |
|------|----------------------|--------|
| 1    | 11.581               | 49.613 |
| 2    | 12.91                | 50.387 |

## SFC Profile of **2I**

Conditions: Daicel Chiralcel OJ-H, column temperature = 40 °C, CO<sub>2</sub>/MeOH = 80/20, Flow rate = 2 mL/min, UV = 280 nm, t<sub>R</sub> = 5.0 min (minor) and t<sub>R</sub> = 8.5 min (major).

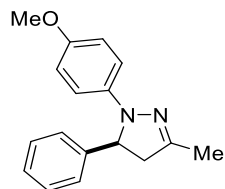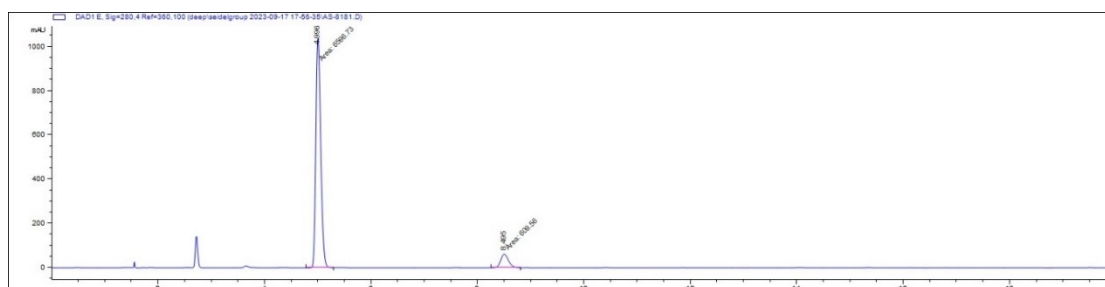

| Peak | Retention time (min) | Area % |
|------|----------------------|--------|
| 1    | 4.996                | 91.541 |
| 2    | 8.495                | 8.459  |

## Racemic sample

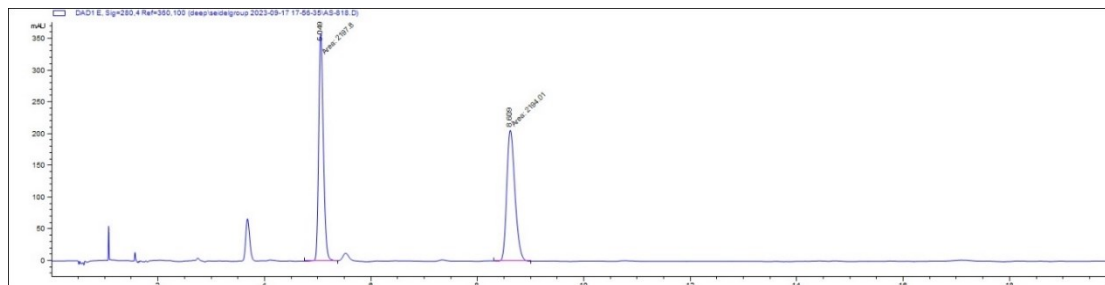

| Peak | Retention time (min) | Area % |
|------|----------------------|--------|
| 1    | 5.049                | 50.043 |
| 2    | 8.609                | 49.957 |

## SFC Profile of **2m**

Conditions: Daicel Chiralcel OJ-H, column temperature = 40 °C, CO<sub>2</sub>/MeOH = 90/10, Flow rate = 2 mL/min, UV = 280 nm, t<sub>R</sub> = 4.7 min (minor) and t<sub>R</sub> = 8.2 min (major).

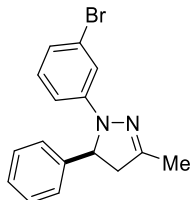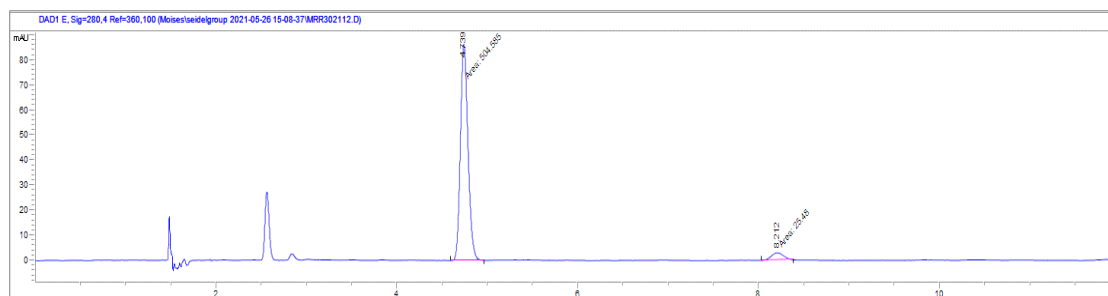

| Peak | Retention time (min) | Area % |
|------|----------------------|--------|
| 1    | 4.739                | 95.193 |
| 2    | 8.212                | 4.807  |

## Racemic sample

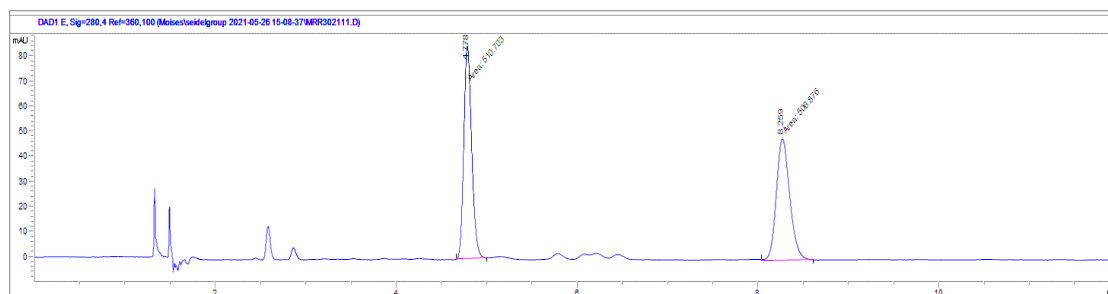

| Peak | Retention time (min) | Area % |
|------|----------------------|--------|
| 1    | 4.778                | 50.188 |
| 2    | 8.259                | 49.812 |

## SFC Profile of **2n**

Conditions: Daicel Chiralcel OJ-H, column temperature = 40 °C, CO<sub>2</sub>/MeOH = 80/20, Flow rate = 2 mL/min, UV = 280 nm, t<sub>R</sub> = 2.9 min (major) and t<sub>R</sub> = 3.9 min (minor).

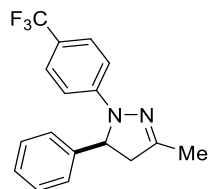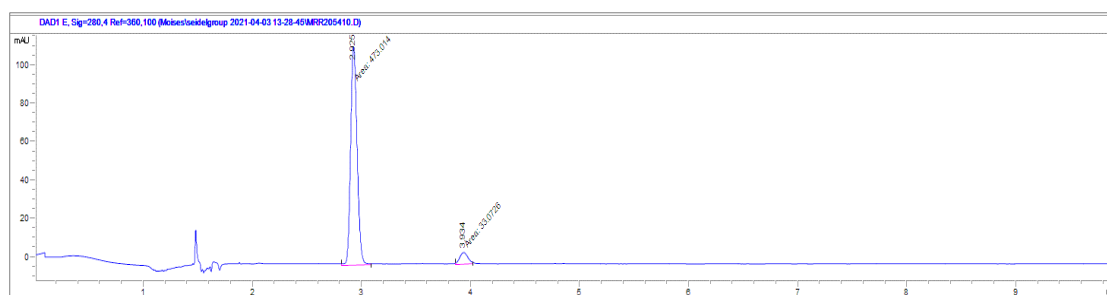

| Peak | Retention time (min) | Area % |
|------|----------------------|--------|
| 1    | 2.925                | 93.465 |
| 2    | 3.934                | 6.536  |

## Racemic sample

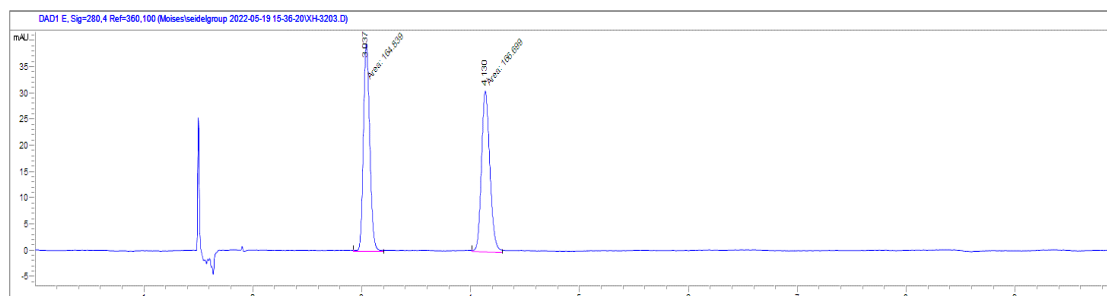

| Peak | Retention time (min) | Area % |
|------|----------------------|--------|
| 1    | 3.037                | 49.719 |
| 2    | 4.131                | 50.281 |

## SFC Profile of **2o**

Conditions: Daicel Chiralcel OJ-H, column temperature = 40 °C, CO<sub>2</sub>/MeOH = 80/20, Flow rate = 2 mL/min, UV = 280 nm, t<sub>R</sub> = 5.4 min (major) and t<sub>R</sub> = 6.7 min (minor).

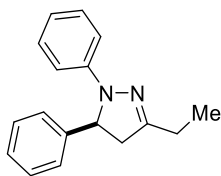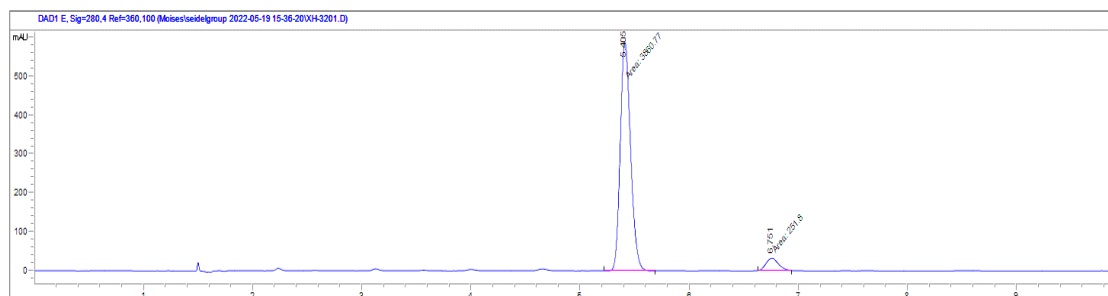

| Peak | Retention time (min) | Area % |
|------|----------------------|--------|
| 1    | 5.405                | 93.877 |
| 2    | 6.751                | 6.123  |

## Racemic sample

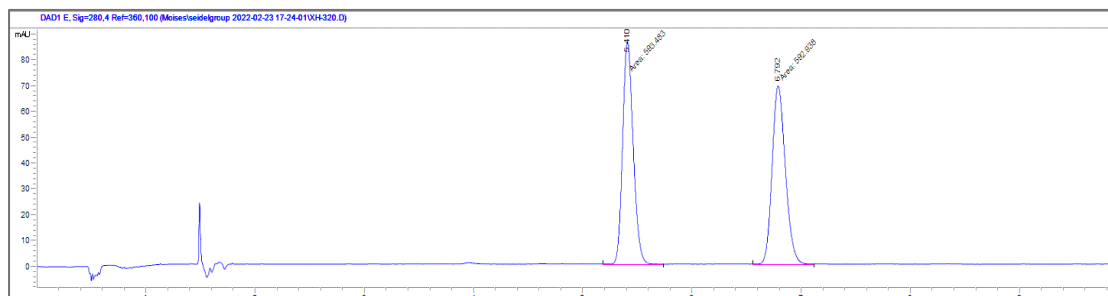

| Peak | Retention time (min) | Area % |
|------|----------------------|--------|
| 1    | 5.41                 | 49.922 |
| 2    | 6.792                | 50.078 |



### SFC Profile of **2p**:

Conditions: Daicel Chiralcel OJ-H, column temperature = 40 °C, CO<sub>2</sub>/MeOH = 90/10, Flow rate = 2 mL/min, UV = 280 nm, t<sub>R</sub> = 8.7 min (major) and t<sub>R</sub> = 9.8 min (minor).

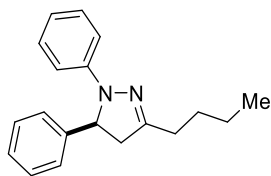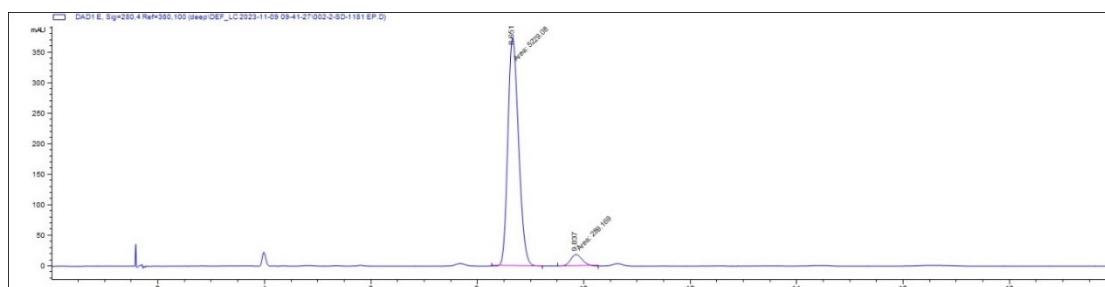

| Peak | Retention time (min) | Area % |
|------|----------------------|--------|
| 1    | 8.651                | 94.760 |
| 2    | 9.837                | 5.240  |

### Racemic sample

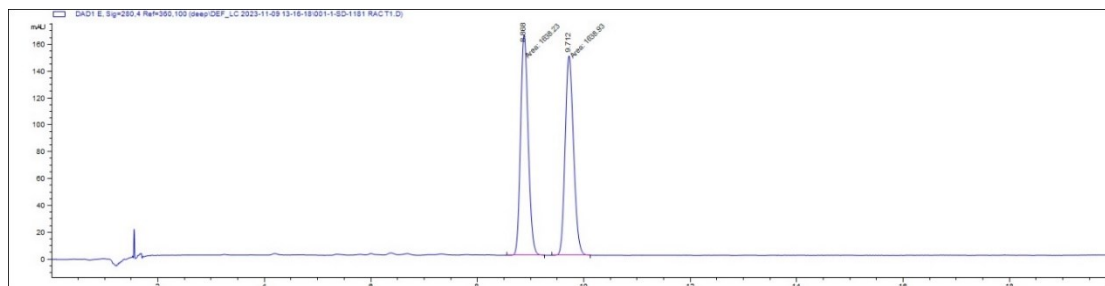

| Peak | Retention time (min) | Area % |
|------|----------------------|--------|
| 1    | 8.868                | 49.989 |
| 2    | 9.712                | 50.011 |

### SFC Profile of **2q**:

Conditions: Daicel Chiralcel OJ-H, column temperature = 40 °C, CO<sub>2</sub>/MeOH = 98/2, Flow rate = 2 mL/min, UV = 280 nm, t<sub>R</sub> = 4.0 min (major) and t<sub>R</sub> = 4.3 min (minor).

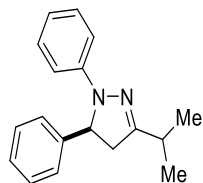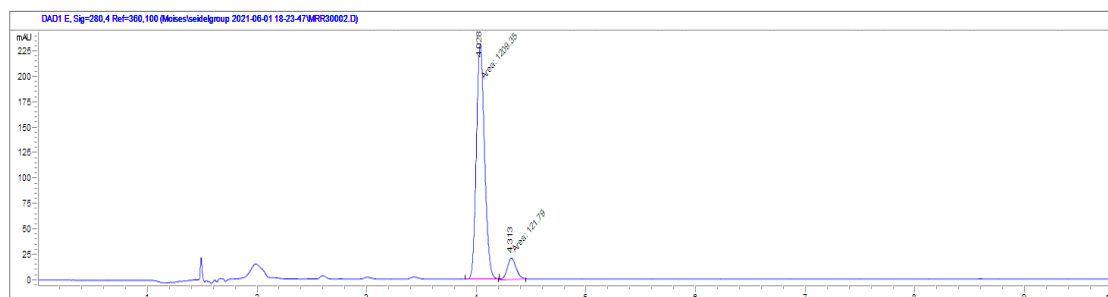

| Peak | Retention time (min) | Area % |
|------|----------------------|--------|
| 1    | 4.028                | 90.851 |
| 2    | 4.313                | 9.149  |

### Racemic sample

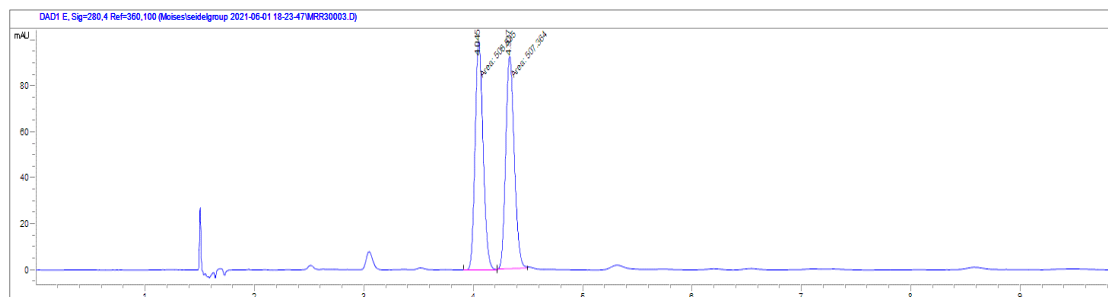

| Peak | Retention time (min) | Area % |
|------|----------------------|--------|
| 1    | 4.045                | 50.058 |
| 2    | 4.327                | 49.942 |

### SFC Profile of **2r**:

Conditions: Daicel Chiralcel OD-H, column temperature = 40 °C, CO<sub>2</sub>/MeOH = 95/5, Flow rate = 2 mL/min, UV = 280 nm, t<sub>R</sub> = 8.8 min (major) and t<sub>R</sub> = 9.7 min (minor).

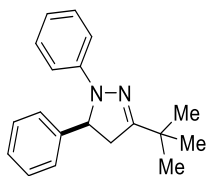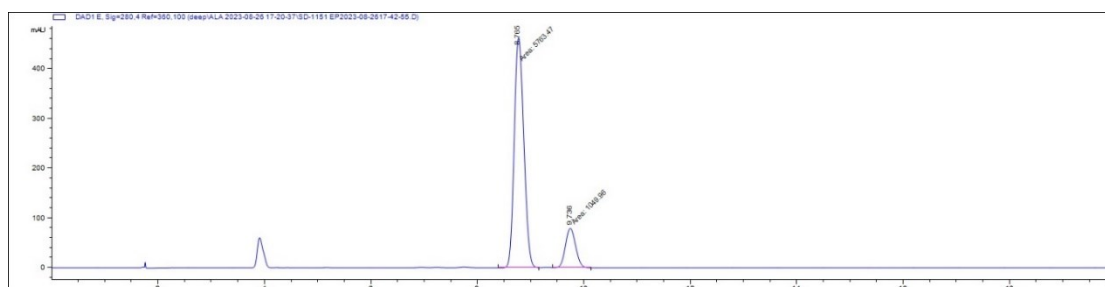

| Peak | Retention time (min) | Area % |
|------|----------------------|--------|
| 1    | 8.765                | 84.590 |
| 2    | 9.736                | 15.410 |

### Racemic sample

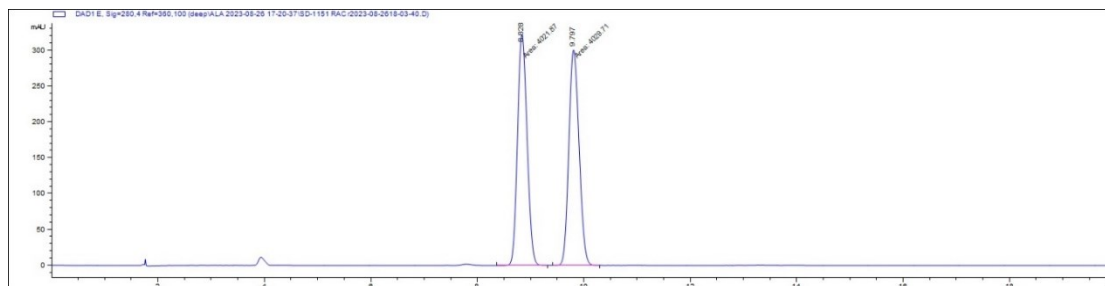

| Peak | Retention time (min) | Area % |
|------|----------------------|--------|
| 1    | 8.828                | 49.951 |
| 2    | 9.797                | 50.049 |

## SFC Profile of **2s**

Conditions: Daicel Chiralcel OJ-H, column temperature = 40 °C, CO<sub>2</sub>/MeOH = 98/2, Flow rate = 2 mL/min, UV = 280 nm, t<sub>R</sub> = 4.8 min (major) and t<sub>R</sub> = 5.2 min (minor).

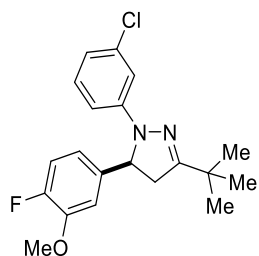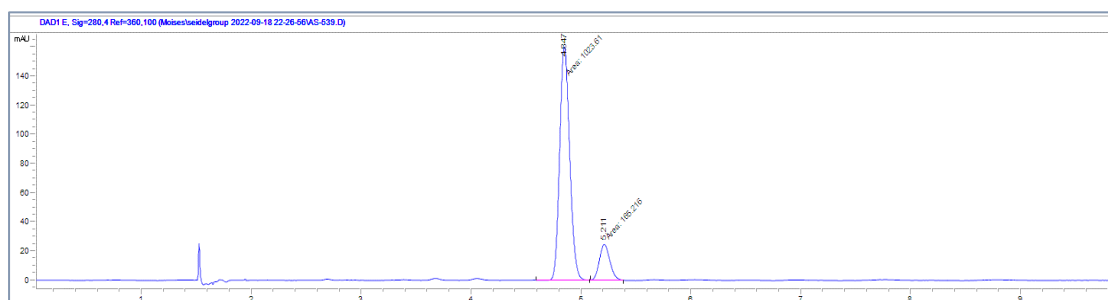

| Peak | Retention time (min) | Area % |
|------|----------------------|--------|
| 1    | 4.847                | 86.103 |
| 2    | 5.211                | 13.897 |

## Racemic sample

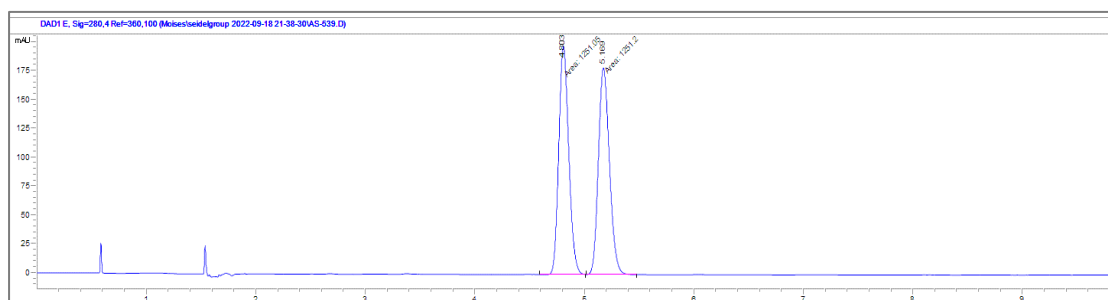

| Peak | Retention time (min) | Area % |
|------|----------------------|--------|
| 1    | 4.803                | 49.997 |
| 2    | 5.169                | 50.003 |

## SFC Profile of 2t

Conditions: Daicel Chiralcel OJ-H, column temperature = 40 °C, CO<sub>2</sub>/MeOH = 90/10, Flow rate = 2 mL/min, UV = 280 nm, t<sub>R</sub> = 9.6 min (major) and t<sub>R</sub> = 11.0 min (minor).

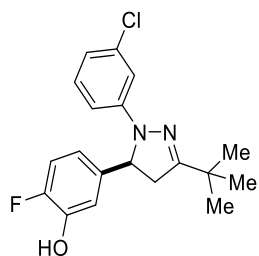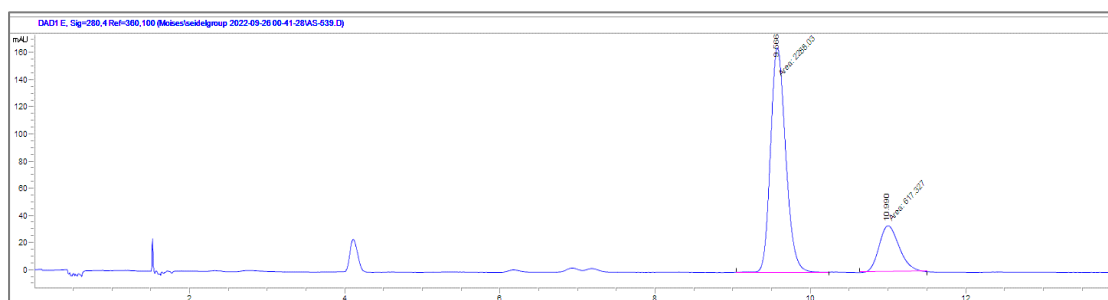

| Peak | Retention time (min) | Area % |
|------|----------------------|--------|
| 1    | 9.566                | 80.621 |
| 2    | 10.99                | 19.379 |

## Racemic sample

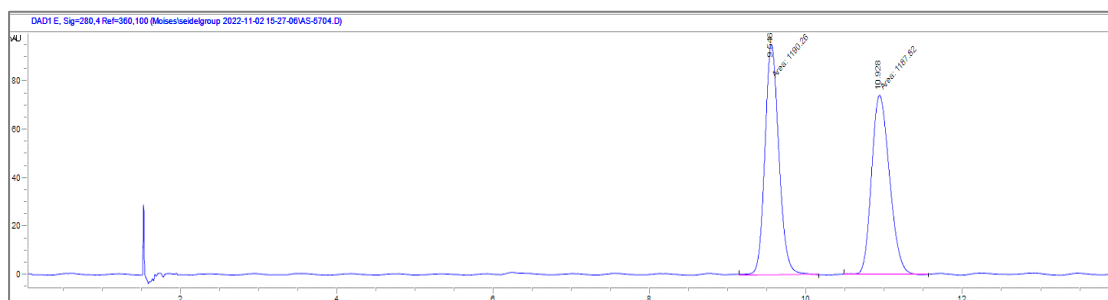

| Peak | Retention time (min) | Area % |
|------|----------------------|--------|
| 1    | 9.546                | 50.051 |
| 2    | 10.928               | 49.949 |

## SFC Profile of 4

Conditions: Daicel Chiralcel AD-H, column temperature = 40 °C, CO<sub>2</sub>/MeOH = 90/10, Flow rate = 2 mL/min, UV = 230 nm, t<sub>R</sub> = 3.3 min (major) and t<sub>R</sub> = 2.9 min (minor).

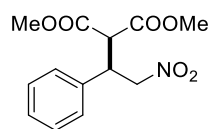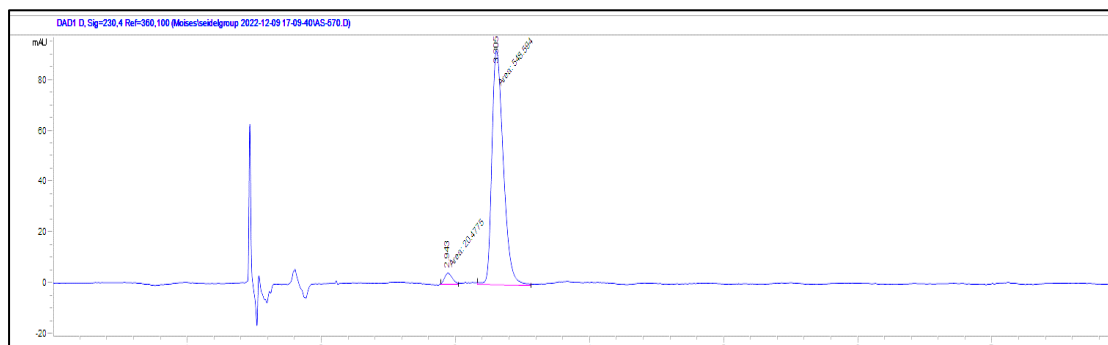

| Peak | Retention time (min) | Area % |
|------|----------------------|--------|
| 1    | 2.943                | 2.924  |
| 2    | 3.305                | 97.076 |

## Racemic sample

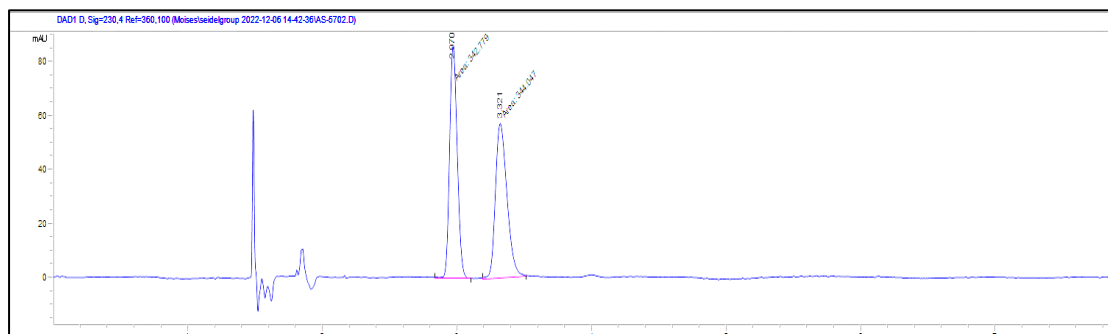

| Peak | Retention time (min) | Area % |
|------|----------------------|--------|
| 1    | 2.97                 | 49.908 |
| 2    | 3.321                | 50.092 |

# NMR Spectra

8.02  
8.01  
8.01  
7.74  
7.74

<sup>1</sup>H-NMR (600 MHz, CDCl<sub>3</sub>) of **S1b**

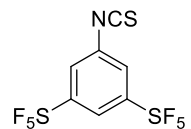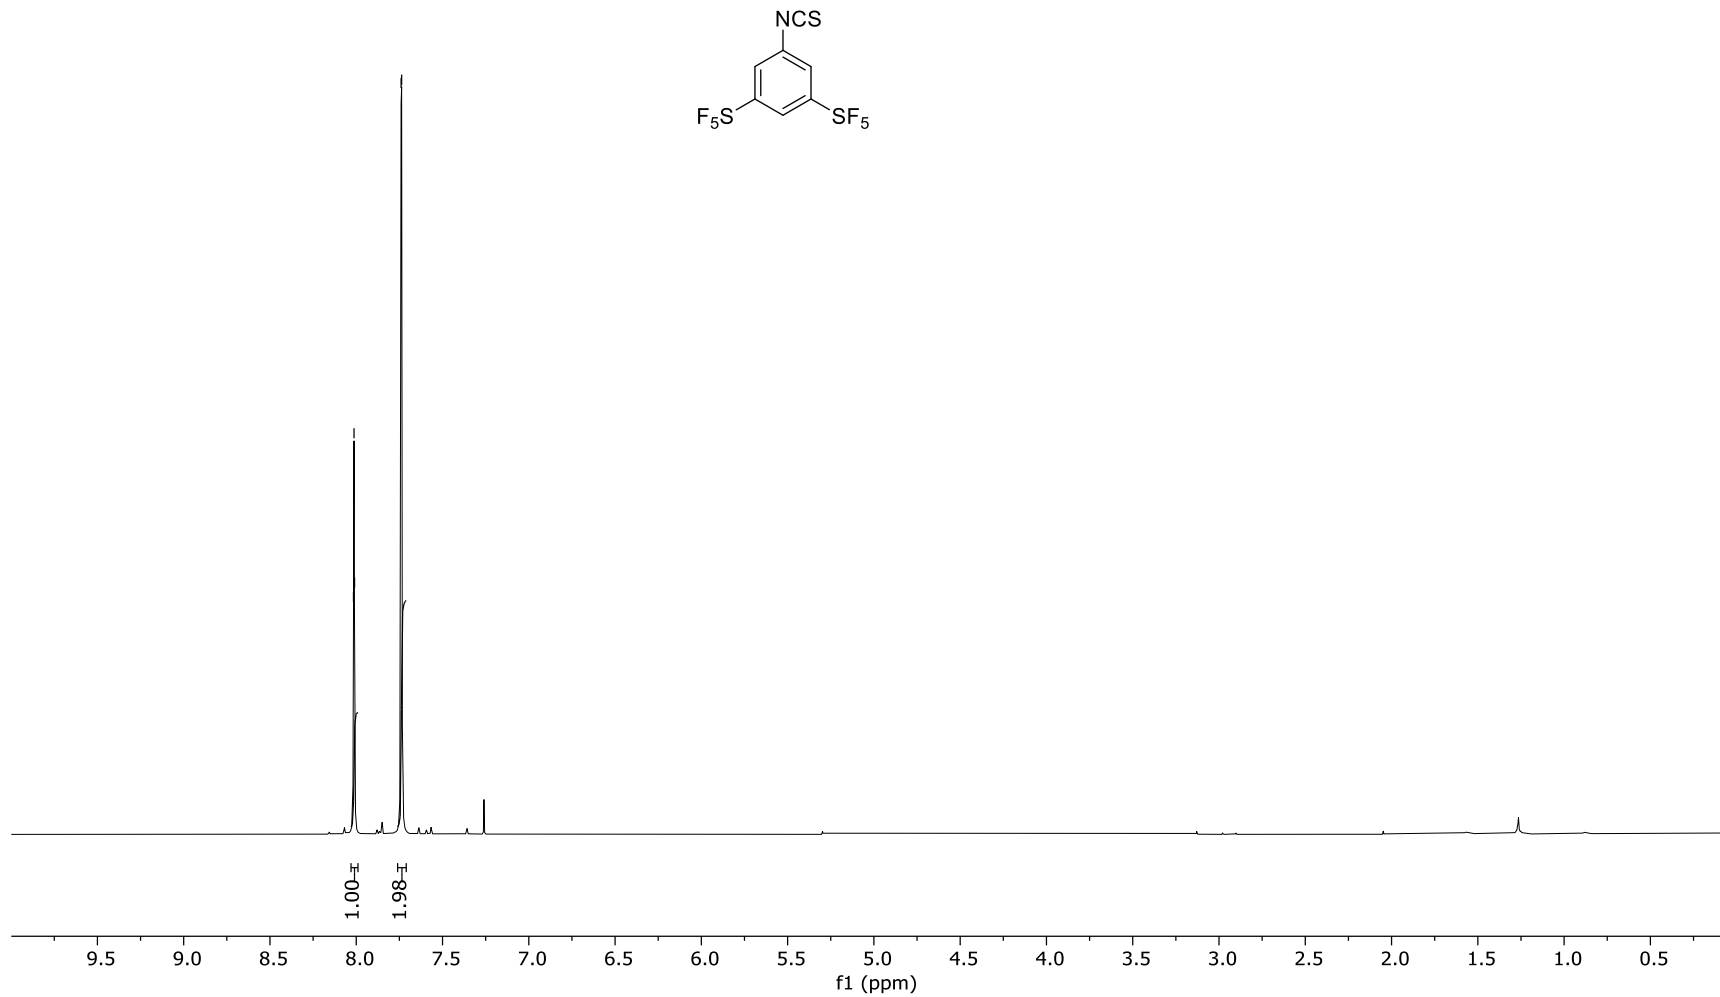

154.44  
154.31  
154.17  
154.03  
153.90  
— 141.72  
— 133.72  
— 126.33  
— 122.15  
77.21  
77.00  
76.79

<sup>13</sup>C-NMR (150 MHz, CDCl<sub>3</sub>) of **S1b**

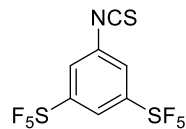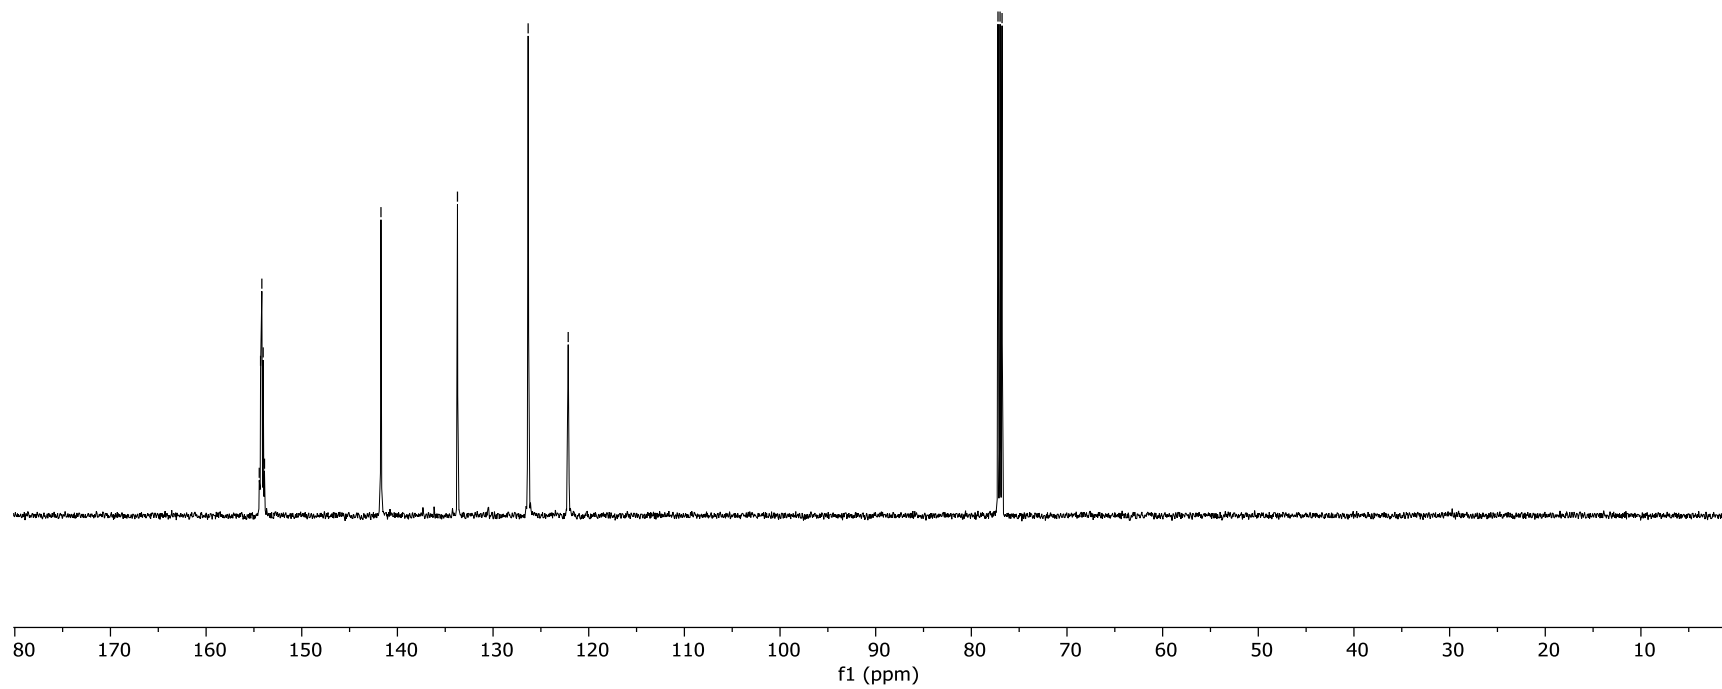



<sup>19</sup>F-NMR (377 MHz, CDCl<sub>3</sub>) of **S1b**

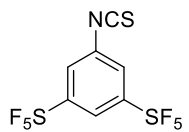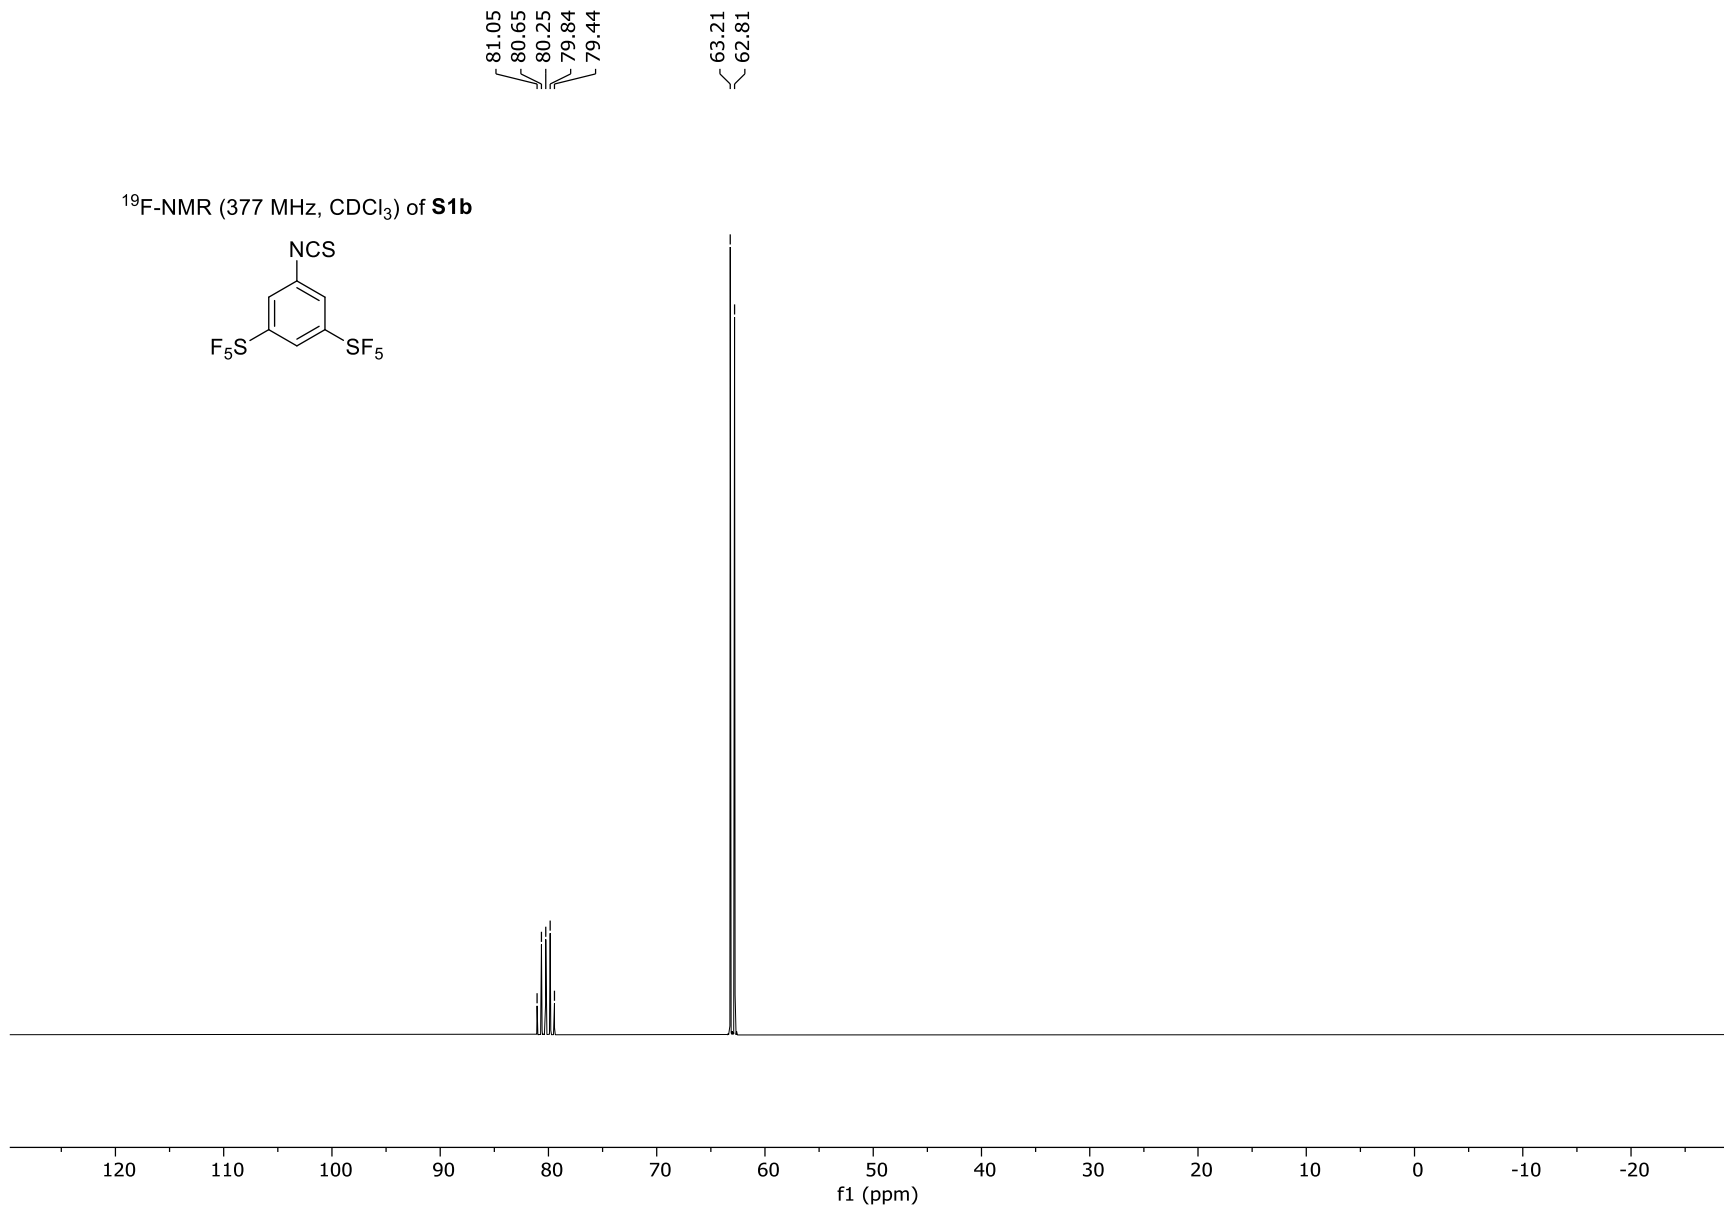

7.76  
7.76  
7.75  
7.74  
7.74  
7.74  
7.29  
7.28

<sup>1</sup>H-NMR (600 MHz, CDCl<sub>3</sub>) of **S1c**

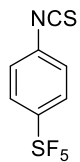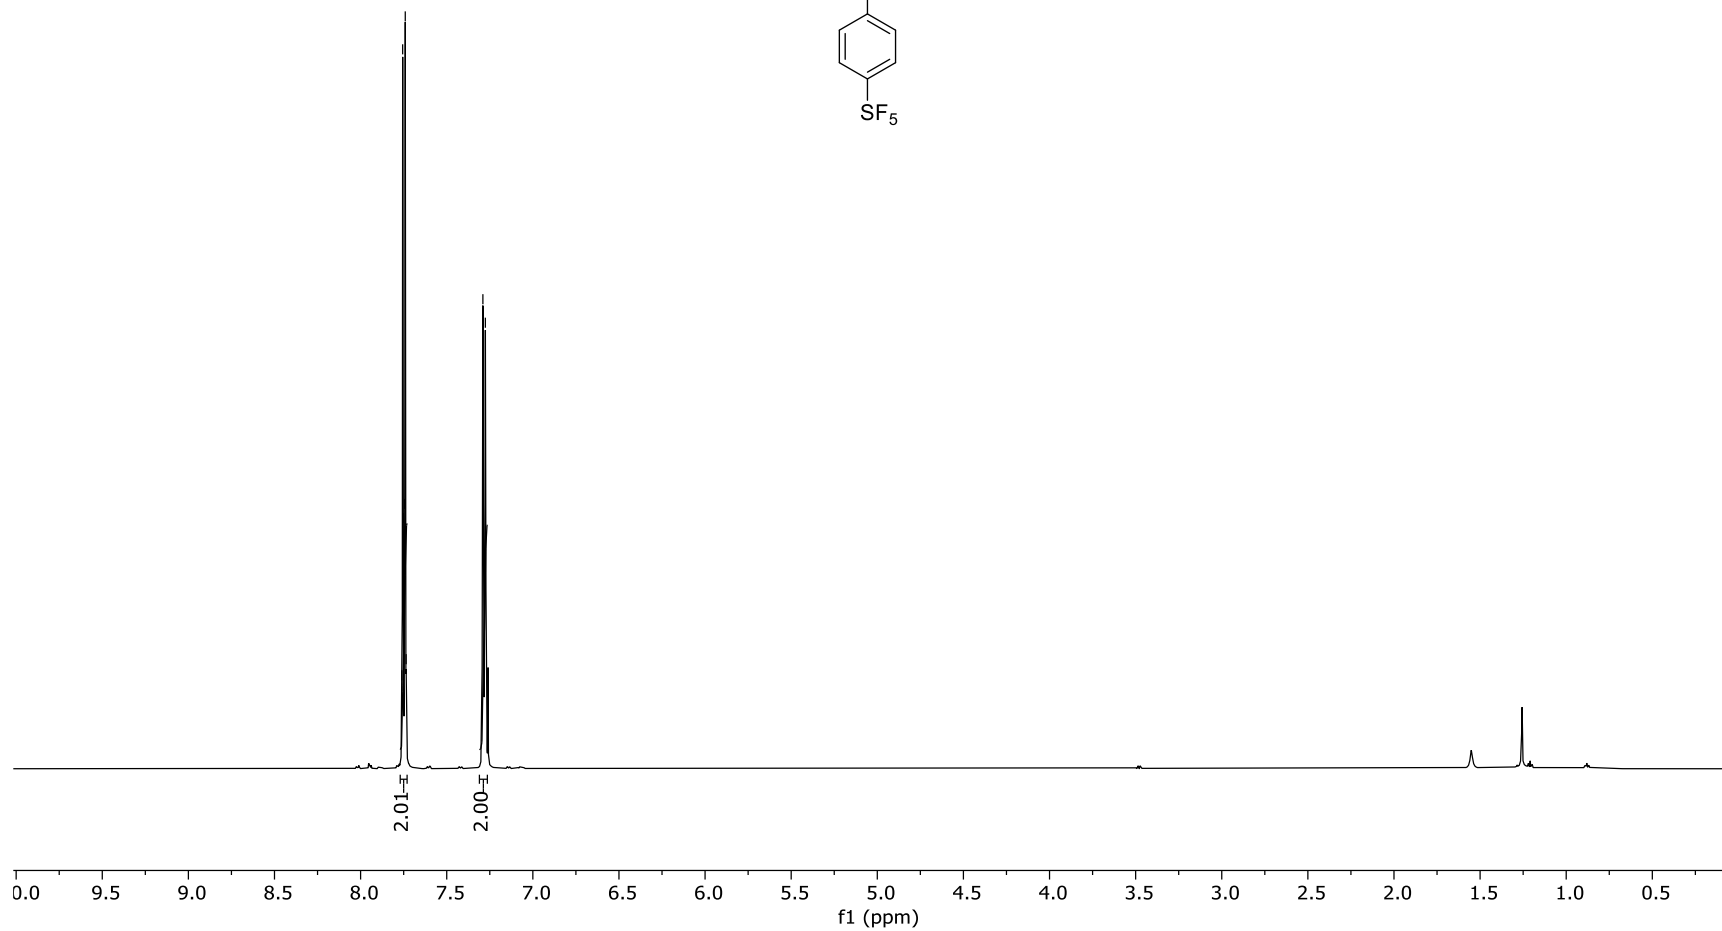

S-70

151.95  
151.83  
151.71  
151.58  
151.46

139.14

134.76

127.65

127.62

127.59

127.56

127.53

125.70

77.21

77.00

76.79

$^{13}\text{C}$ -NMR (150 MHz,  $\text{CDCl}_3$ ) of **S1c**

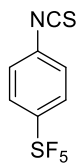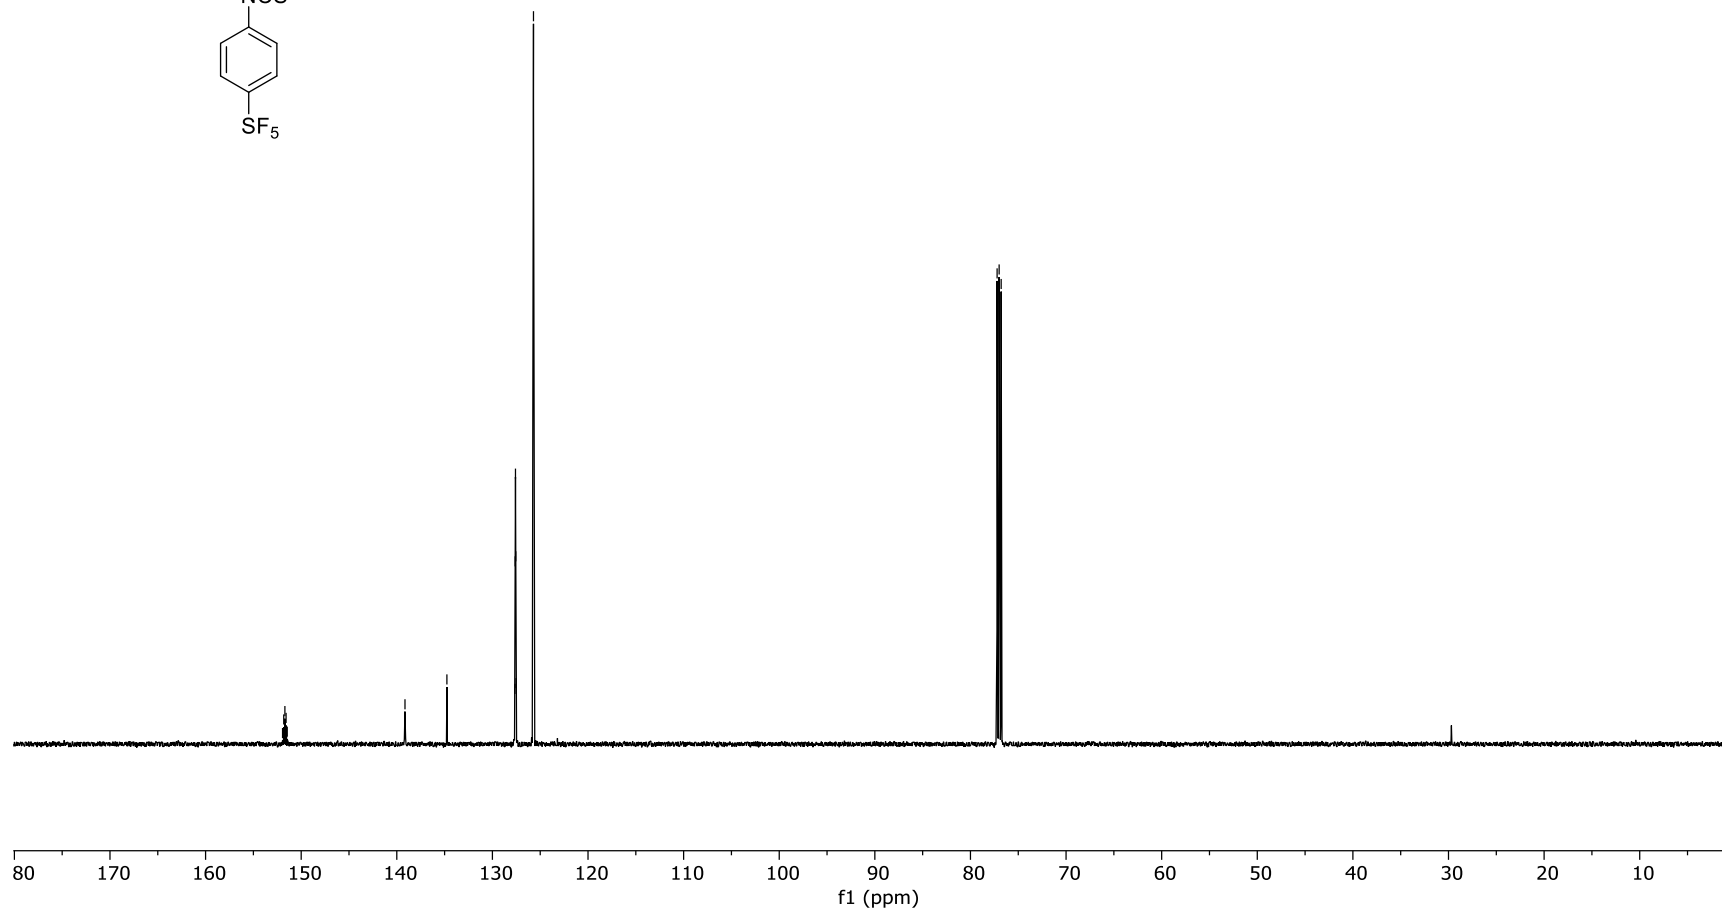

$^{19}\text{F}$ -NMR (565 MHz,  $\text{CDCl}_3$ ) of **S1c**

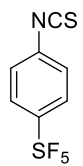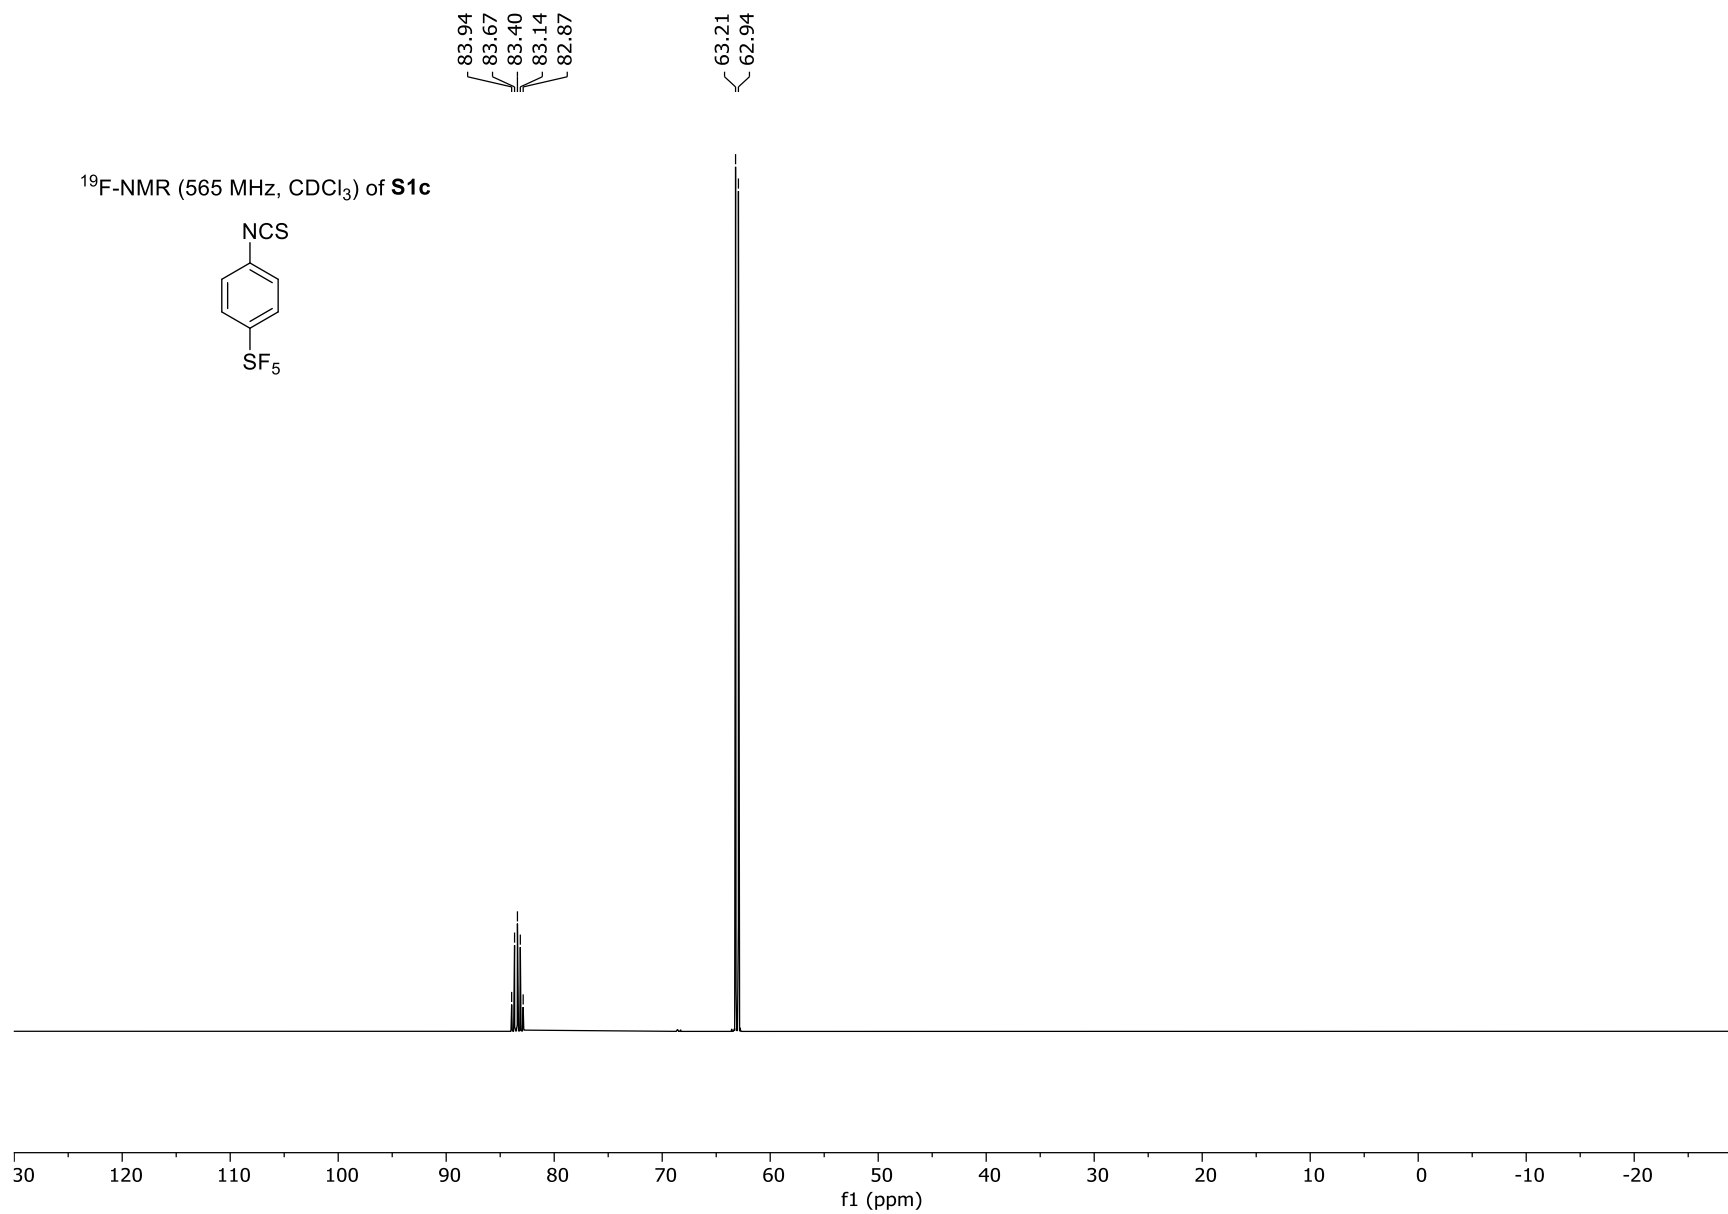

7.67  
7.66  
7.65  
7.65  
7.60  
7.60  
7.48  
7.47  
7.46  
7.37  
7.36

<sup>1</sup>H-NMR (600 MHz, CDCl<sub>3</sub>) of **S1d**

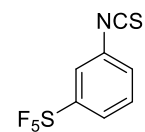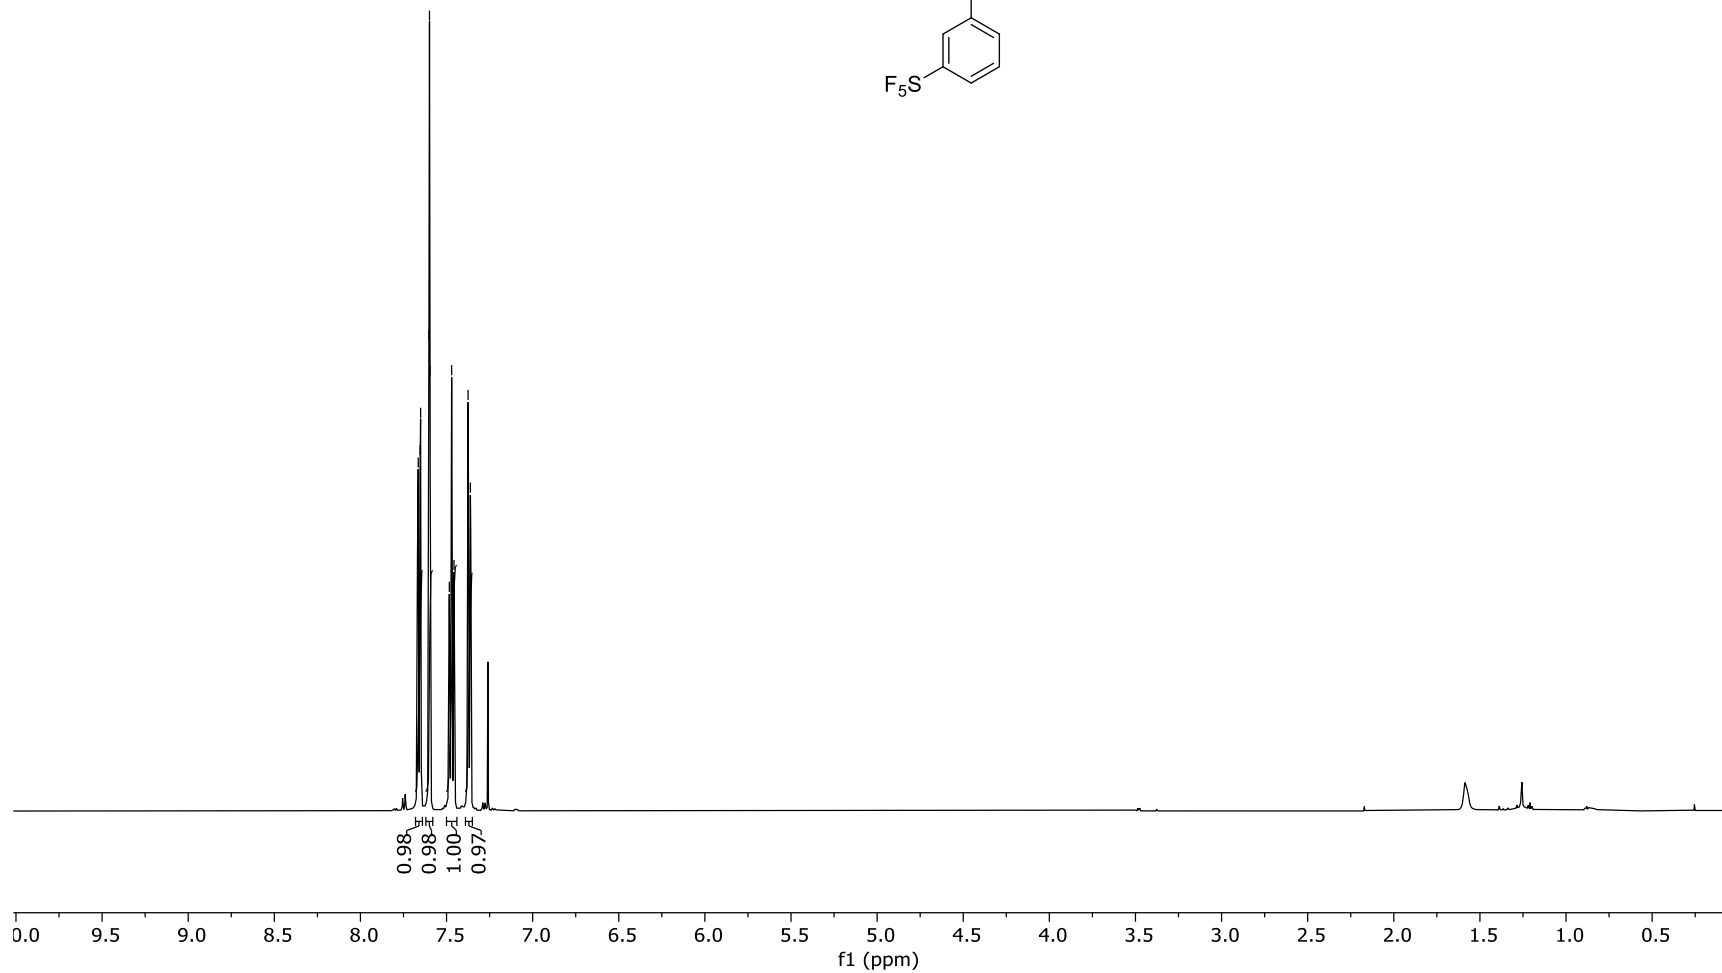

154.66  
154.53  
154.41  
154.28  
154.17

138.73  
132.40  
129.84  
128.64  
124.52  
124.49  
124.46  
124.43  
124.40  
123.57  
123.53  
123.50  
123.47  
123.44

77.21  
77.00  
76.79

$^{13}\text{C}$ -NMR (150 MHz,  $\text{CDCl}_3$ ) of **S1d**

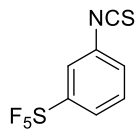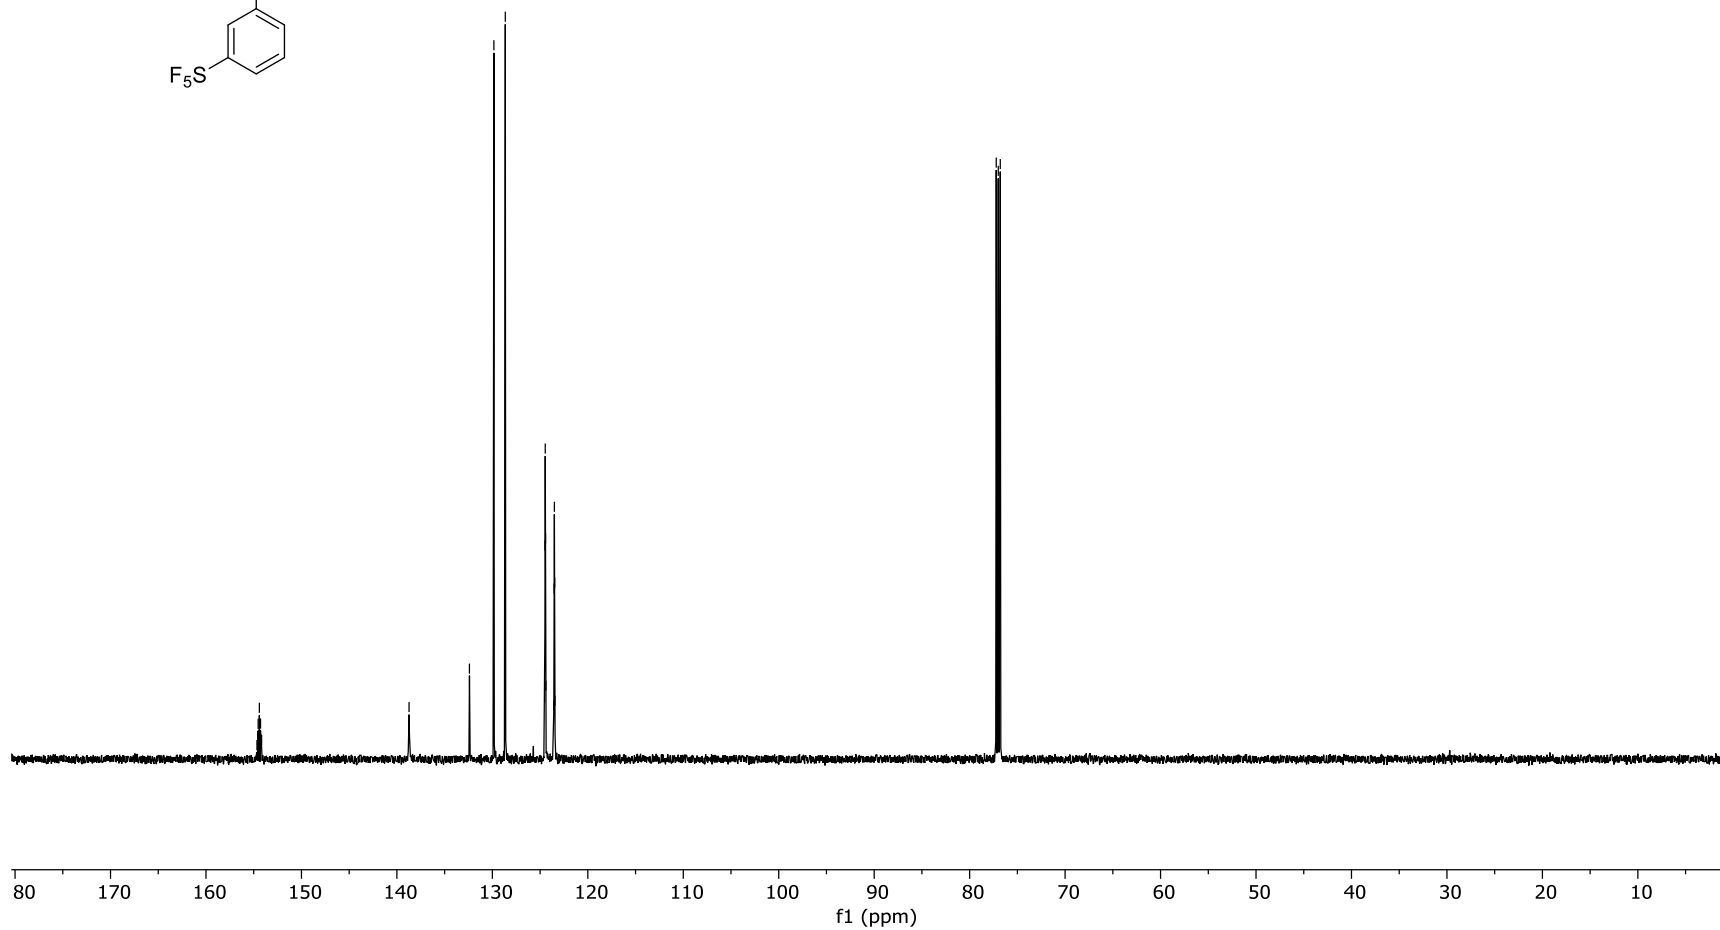

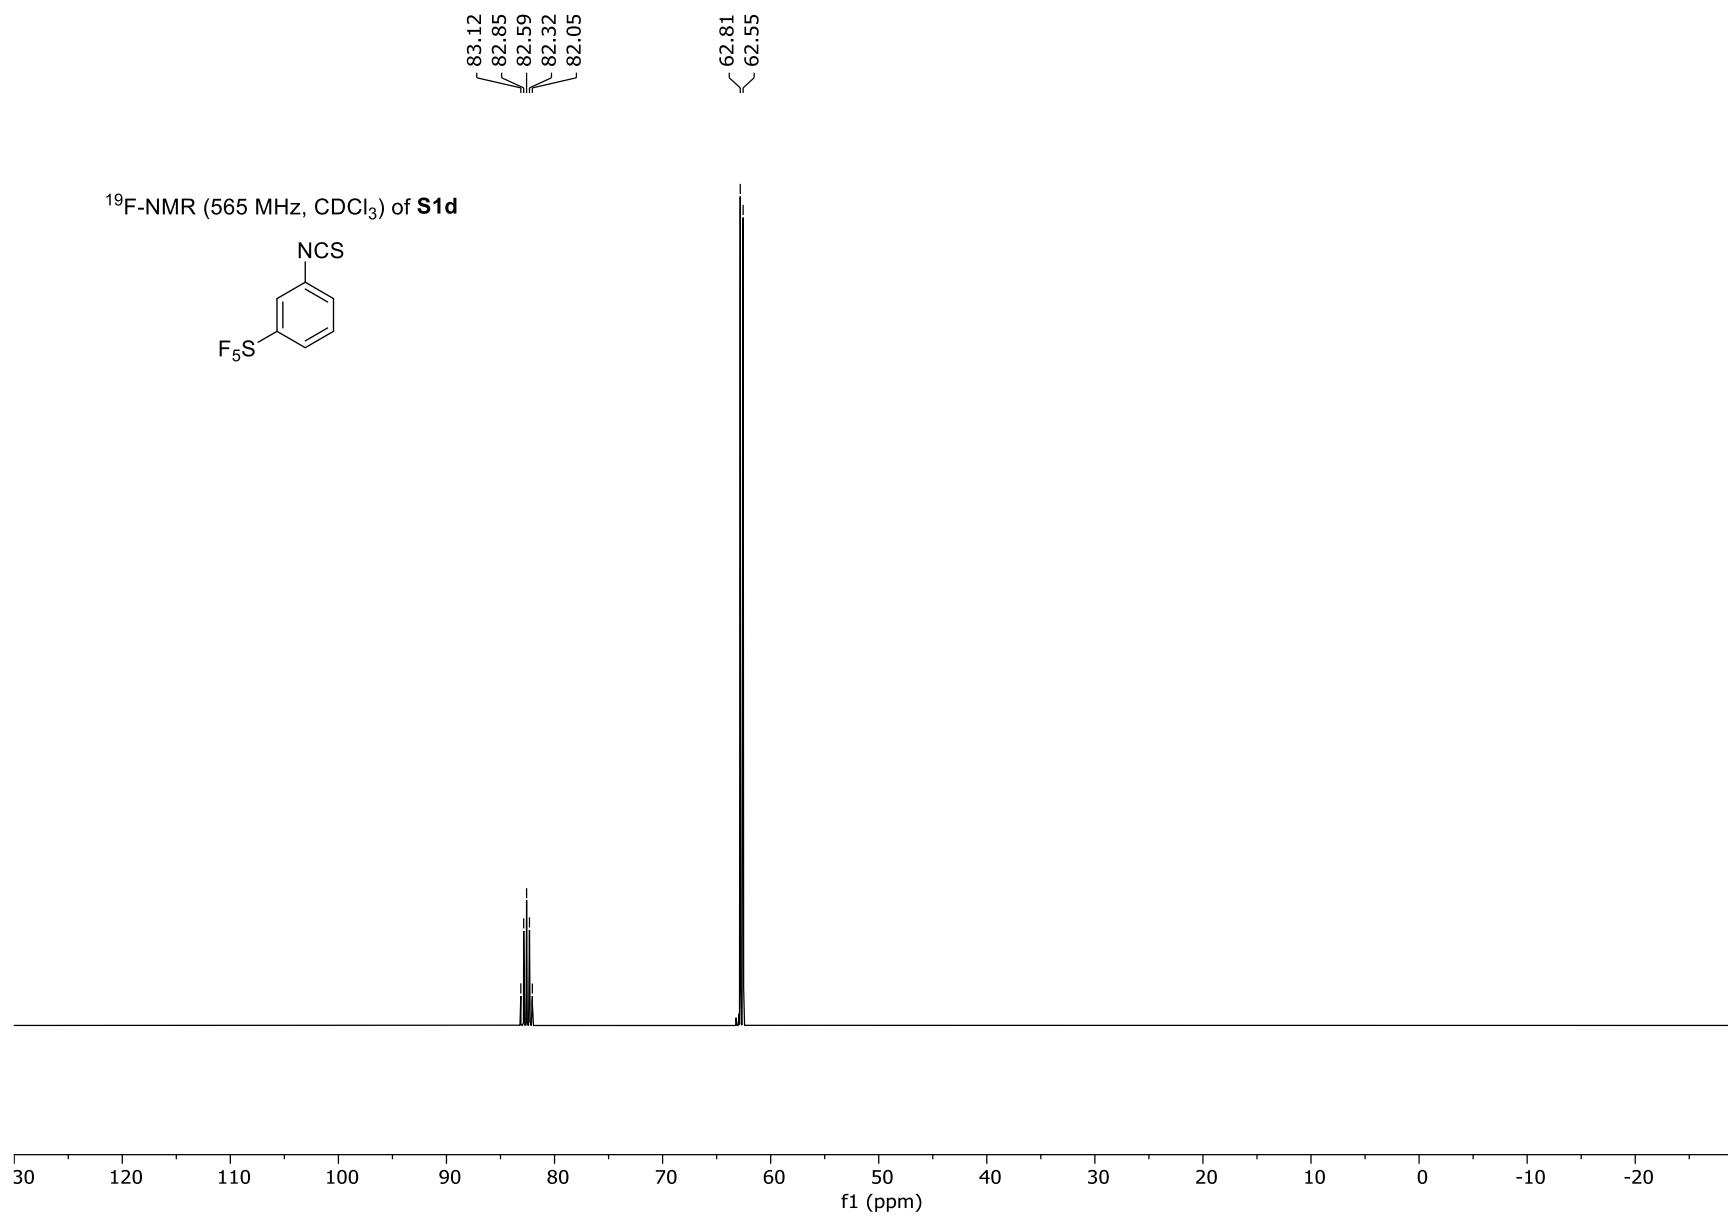

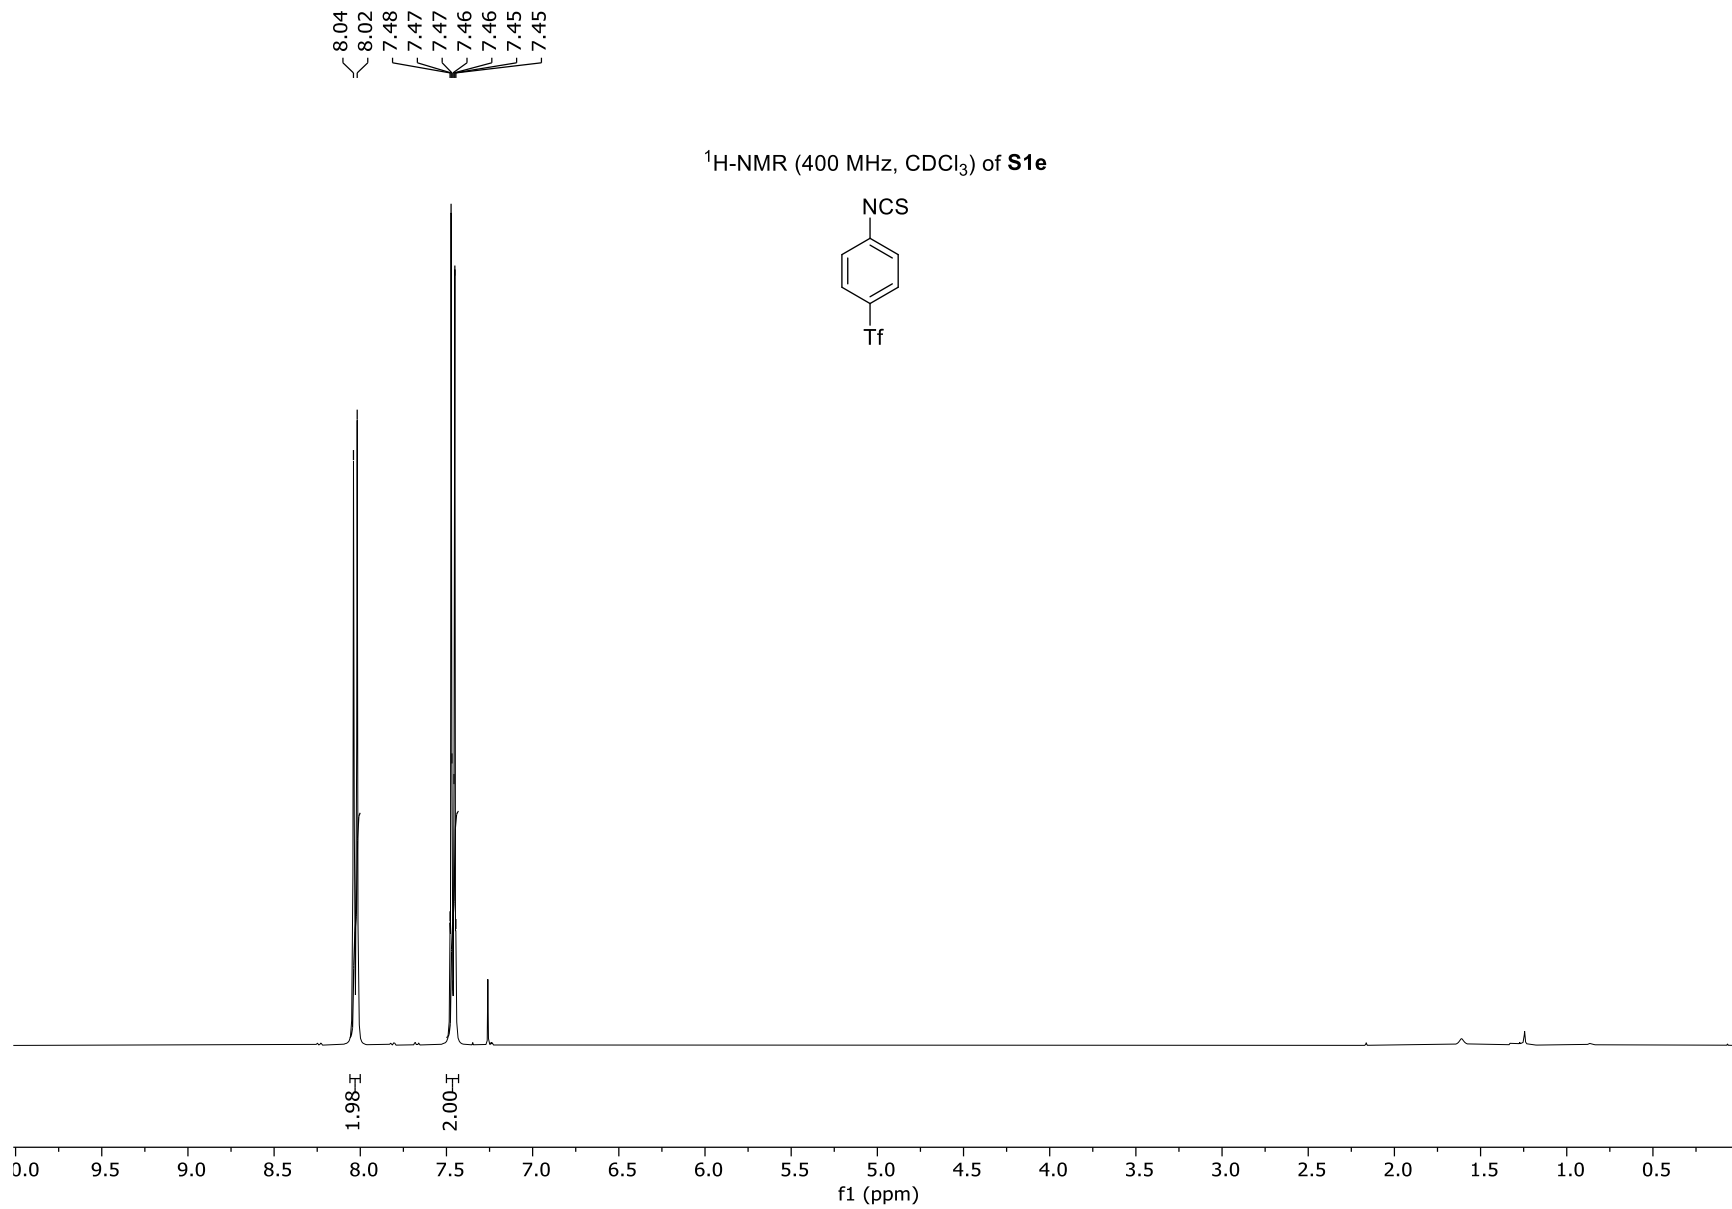



~ 141.49  
~ 140.17  
~ 132.50  
~ 128.97  
~ 126.92  
/ 122.91  
/ 120.75  
/ 118.59  
~ 116.43  
  
/ 77.21  
/ 77.00  
/ 76.79

<sup>13</sup>C-NMR (150 MHz, CDCl<sub>3</sub>) of **S1e**

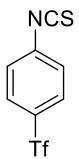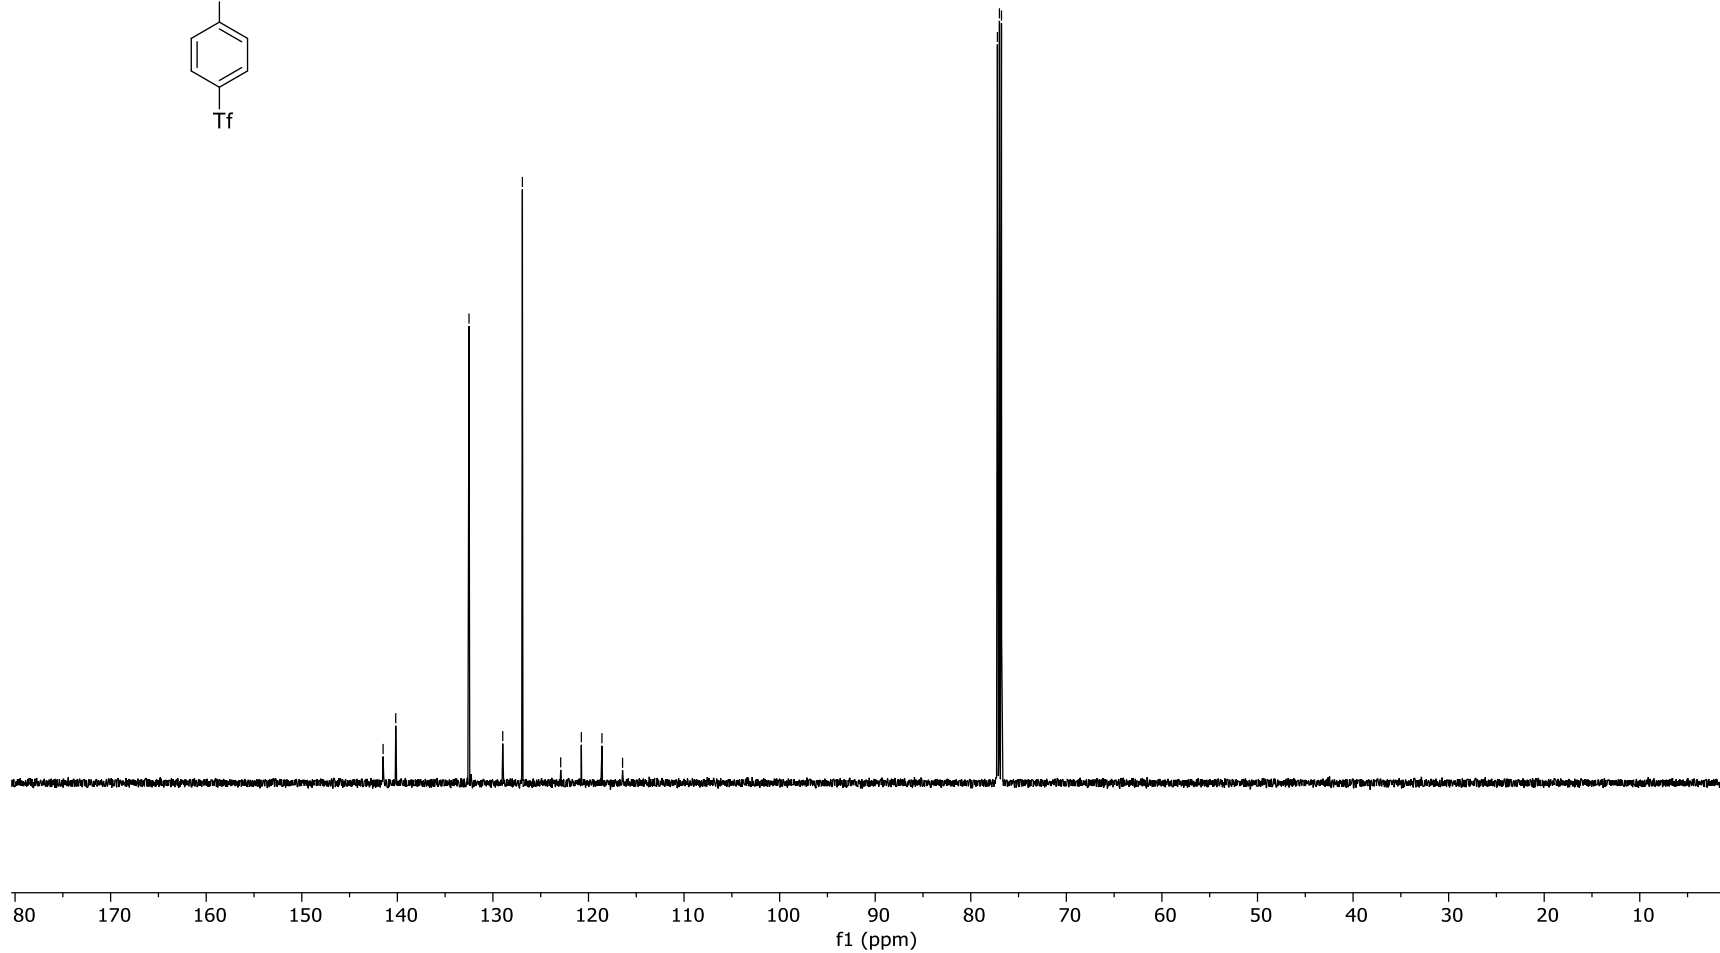

<sup>19</sup>F-NMR (565 MHz, CDCl<sub>3</sub>) of **S1e**

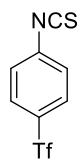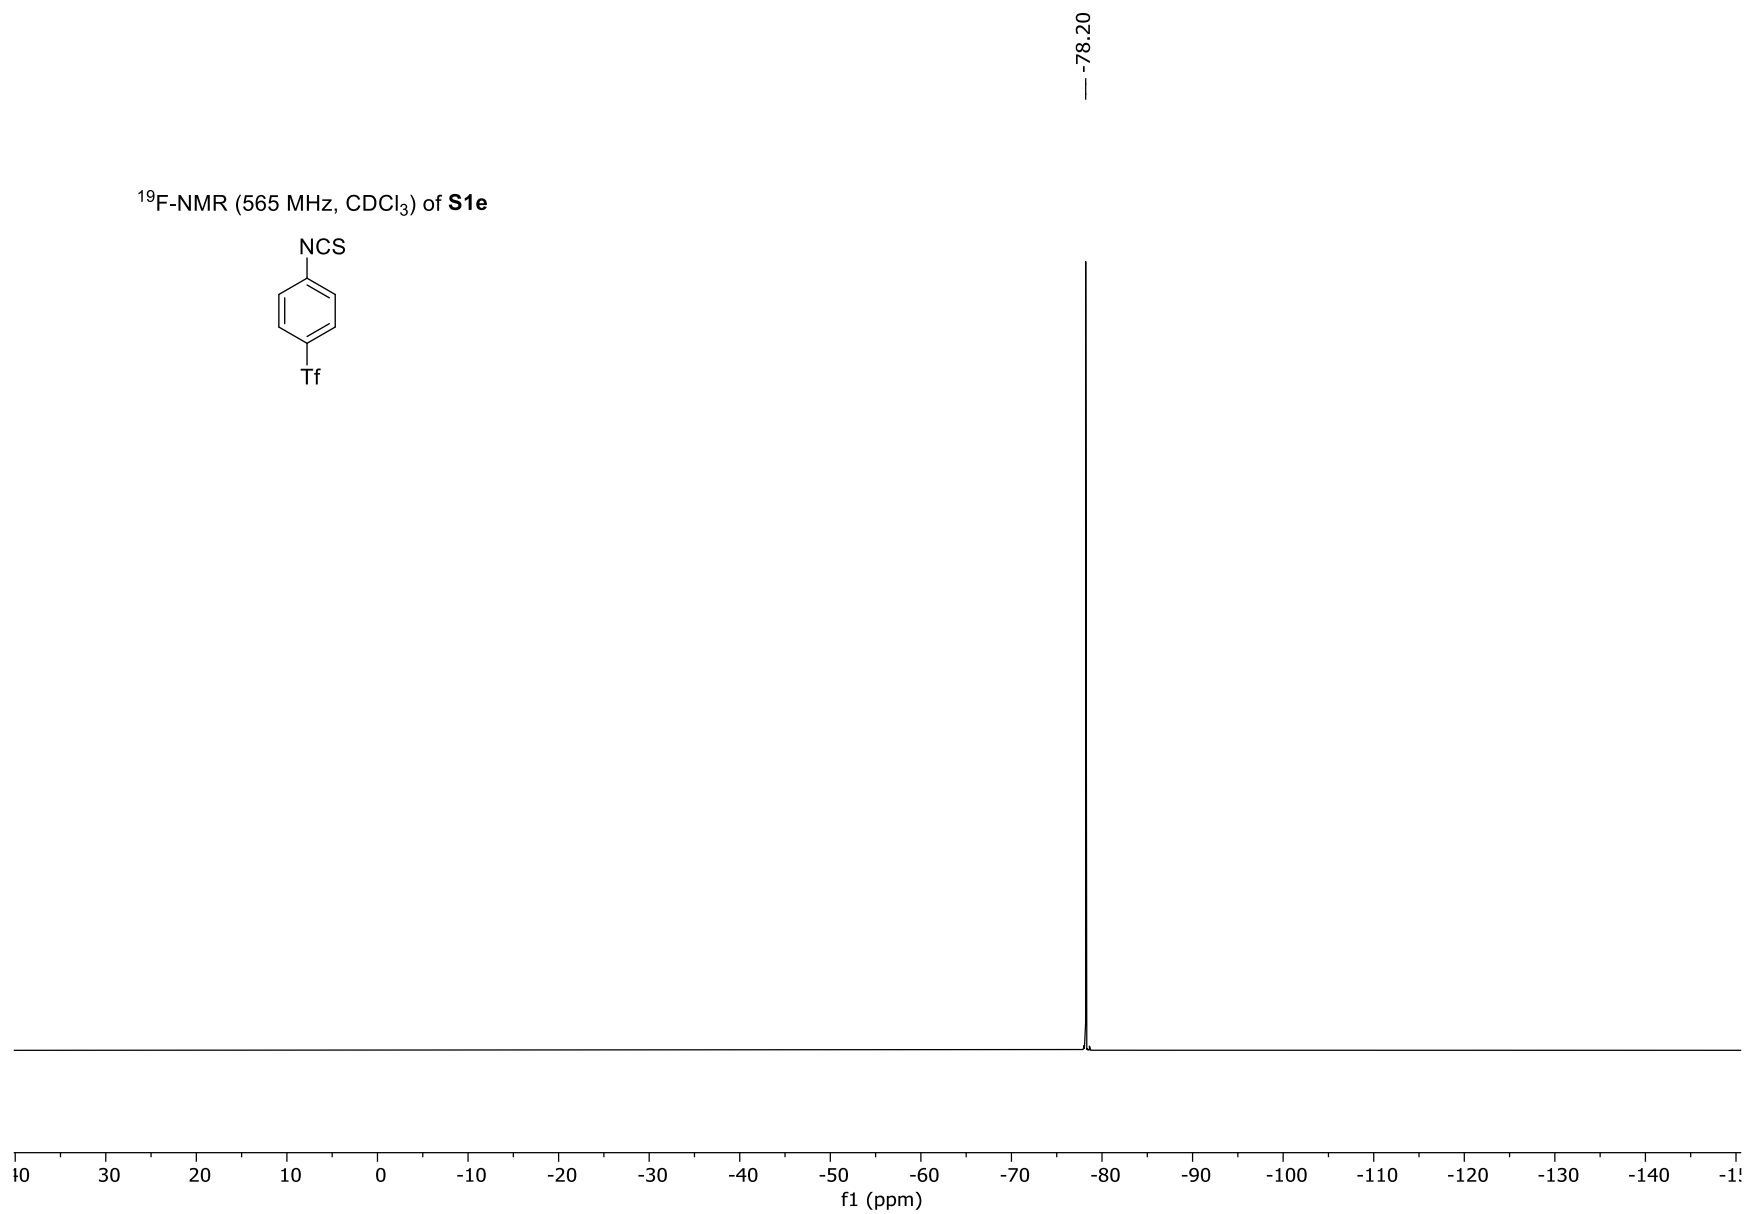

S-78

<sup>1</sup>H-NMR (500 MHz, (CD<sub>3</sub>)<sub>2</sub>SO) of **S2b**

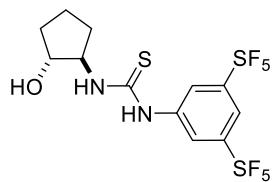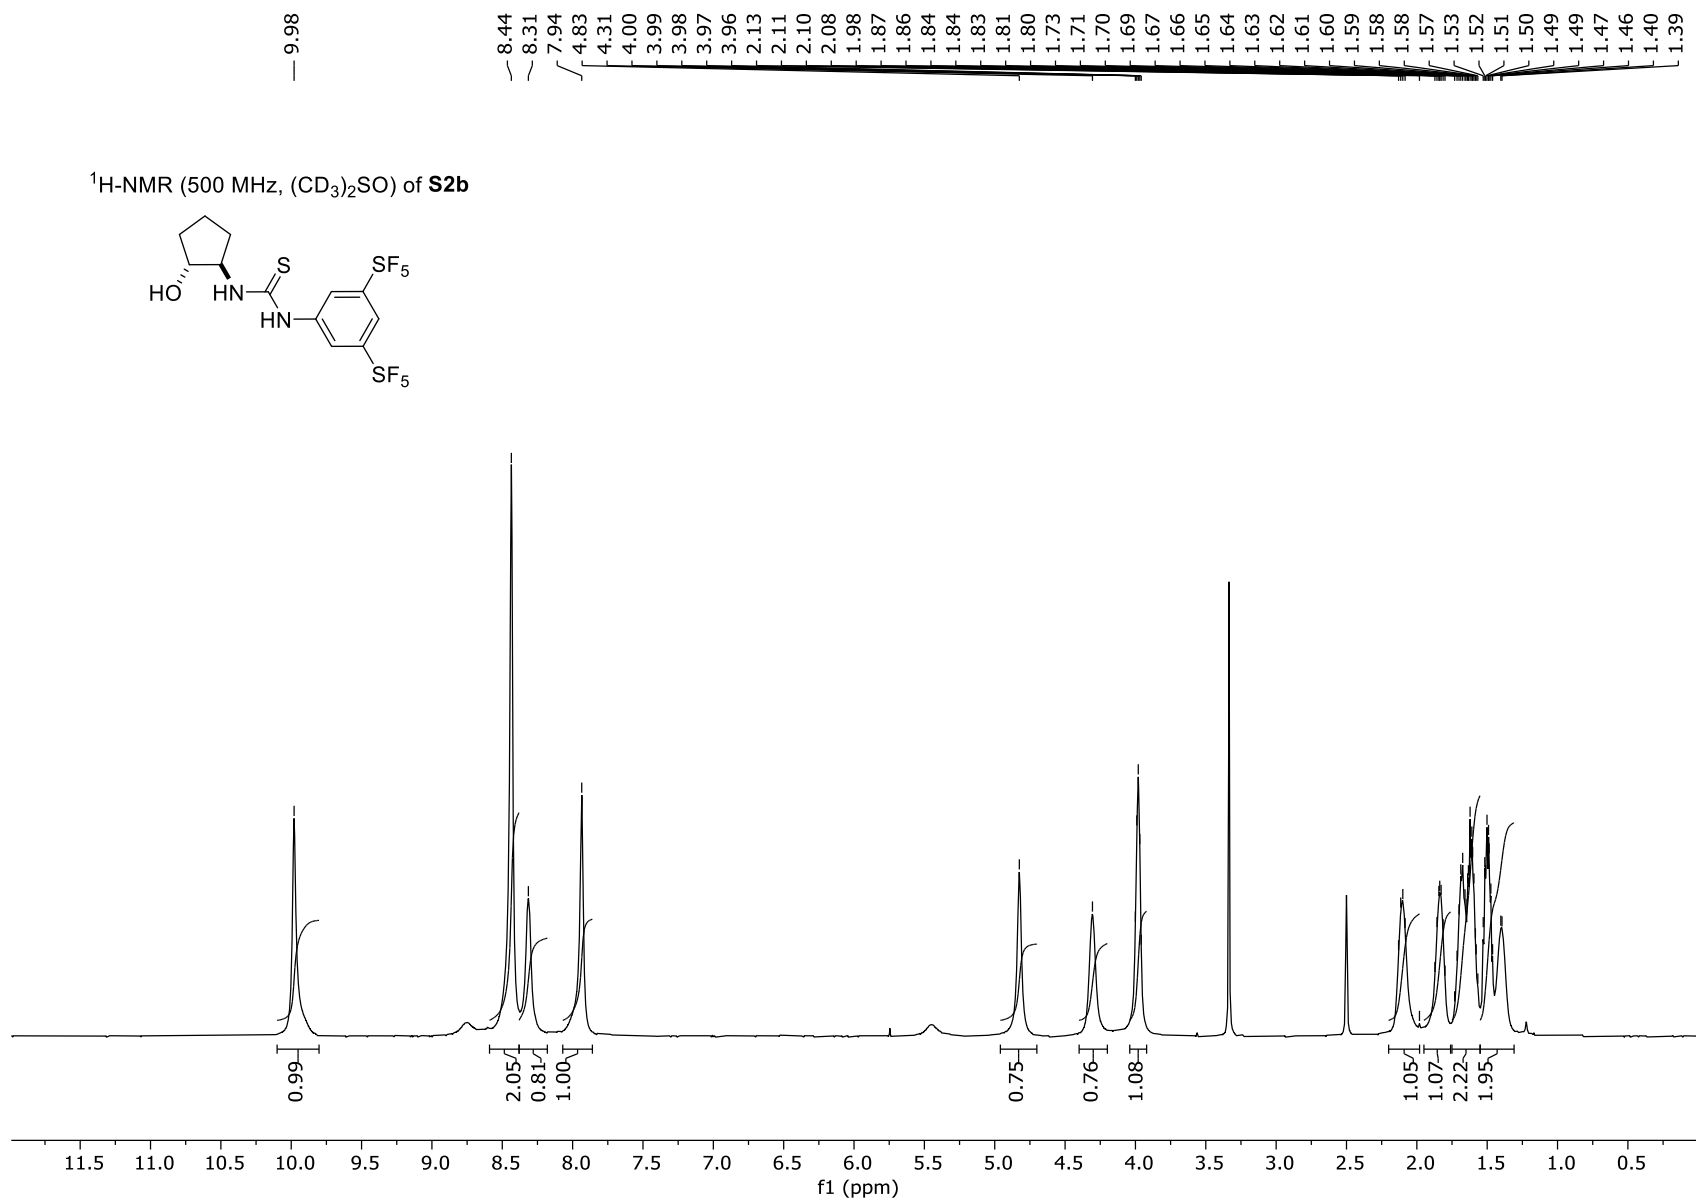

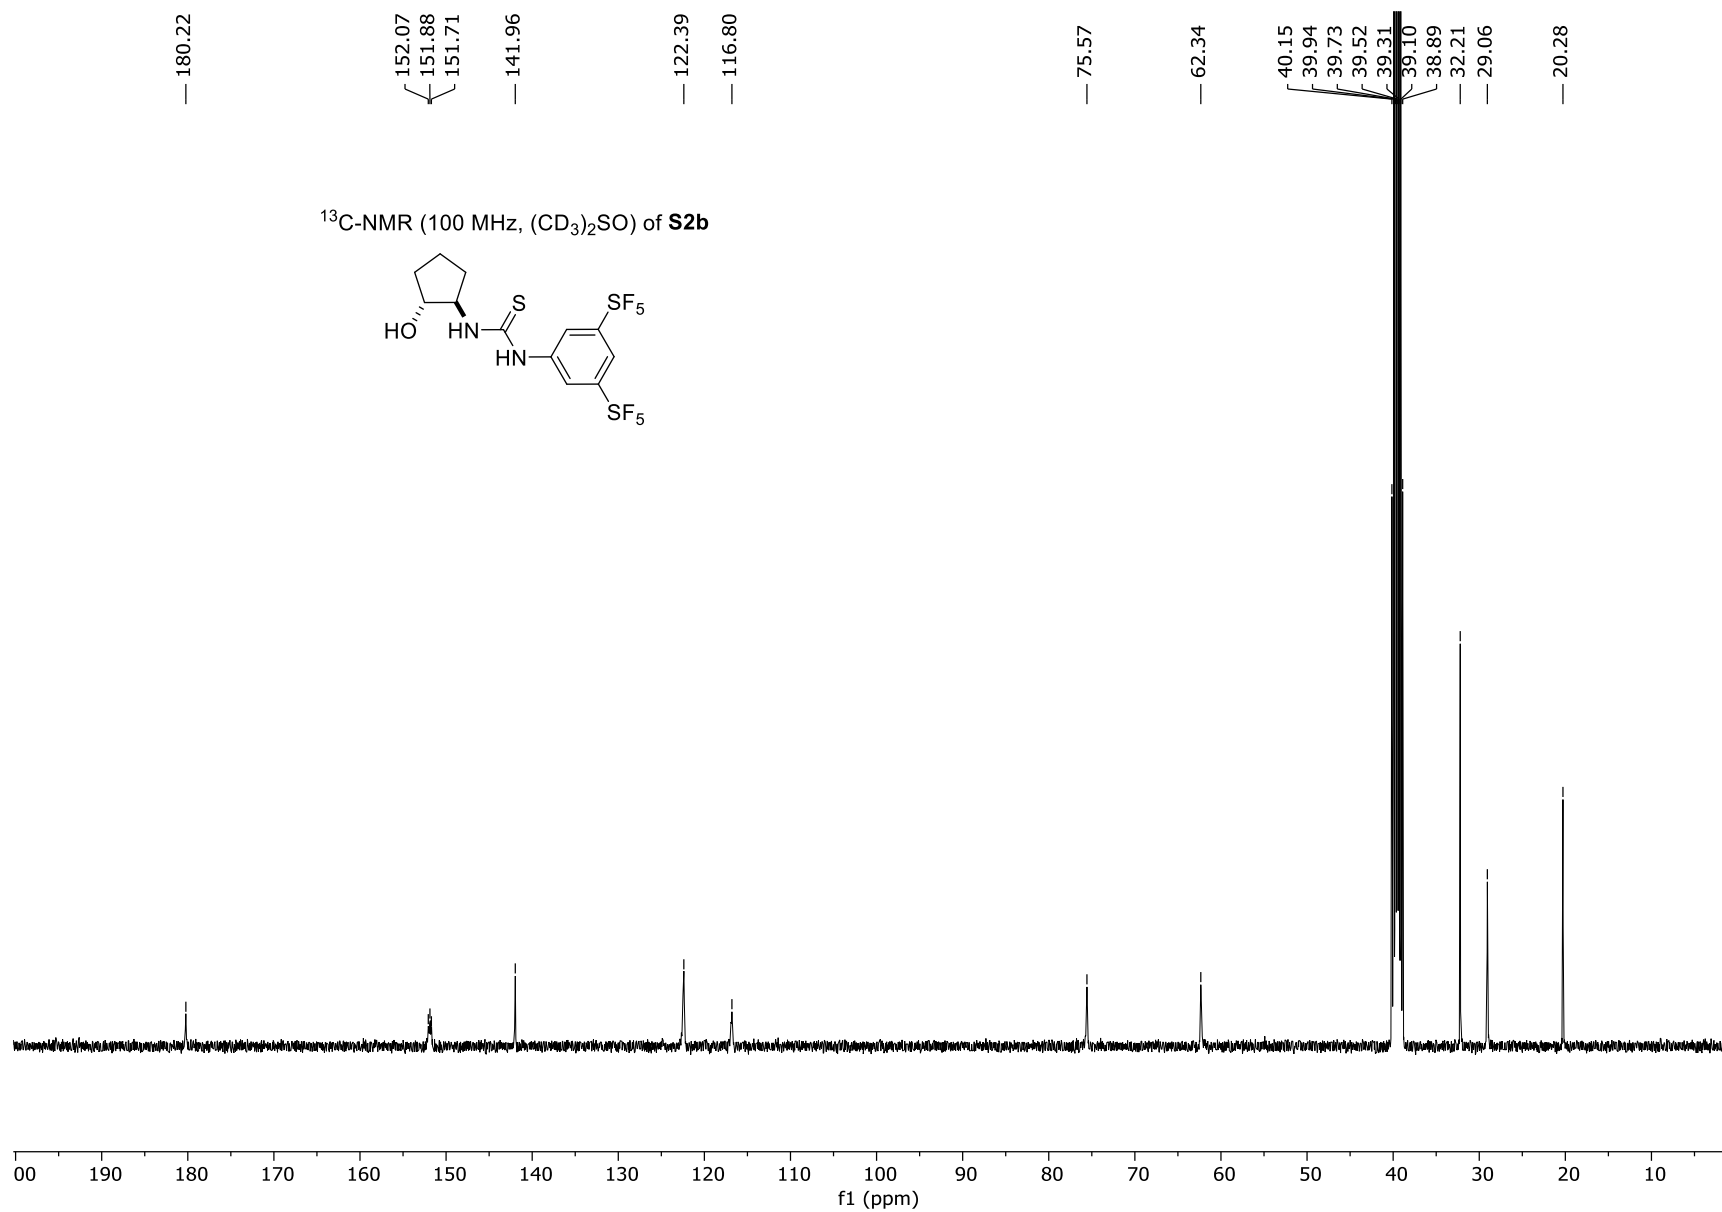

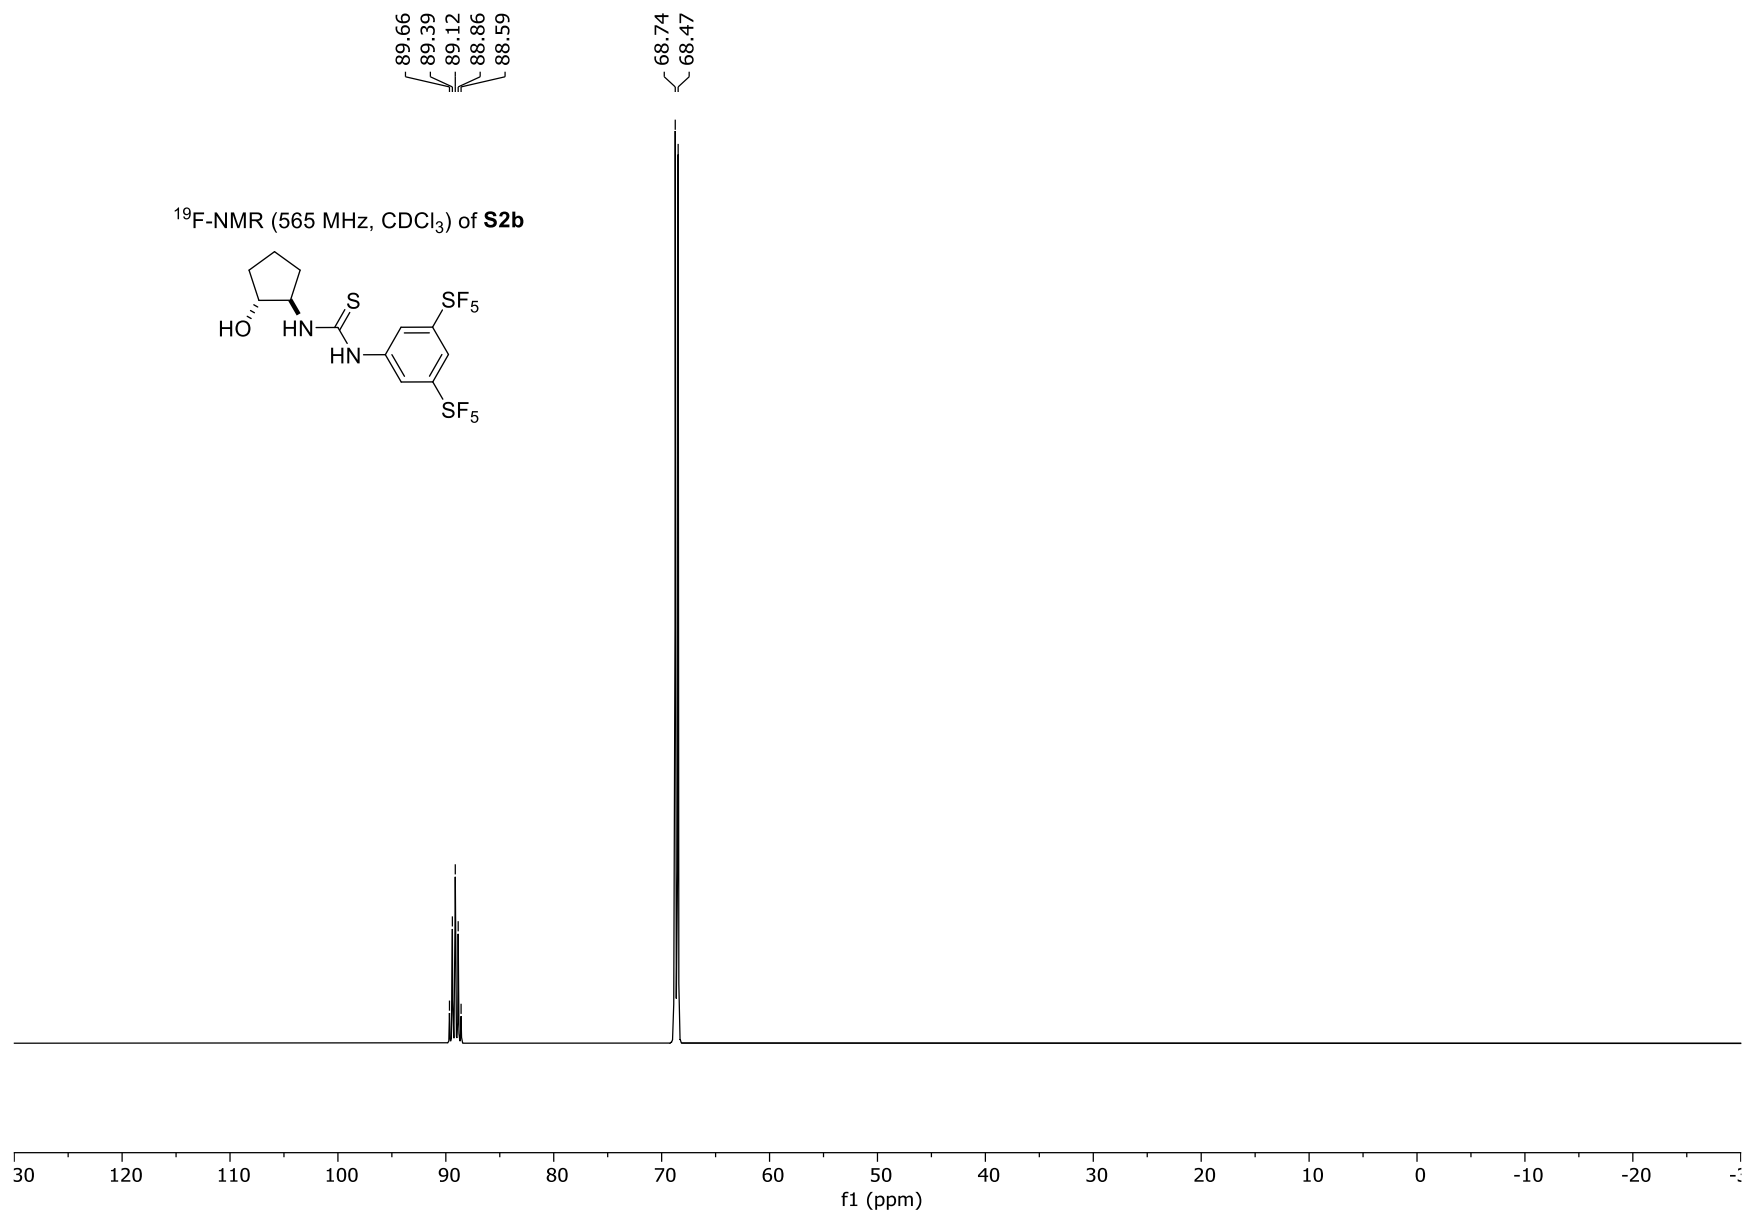

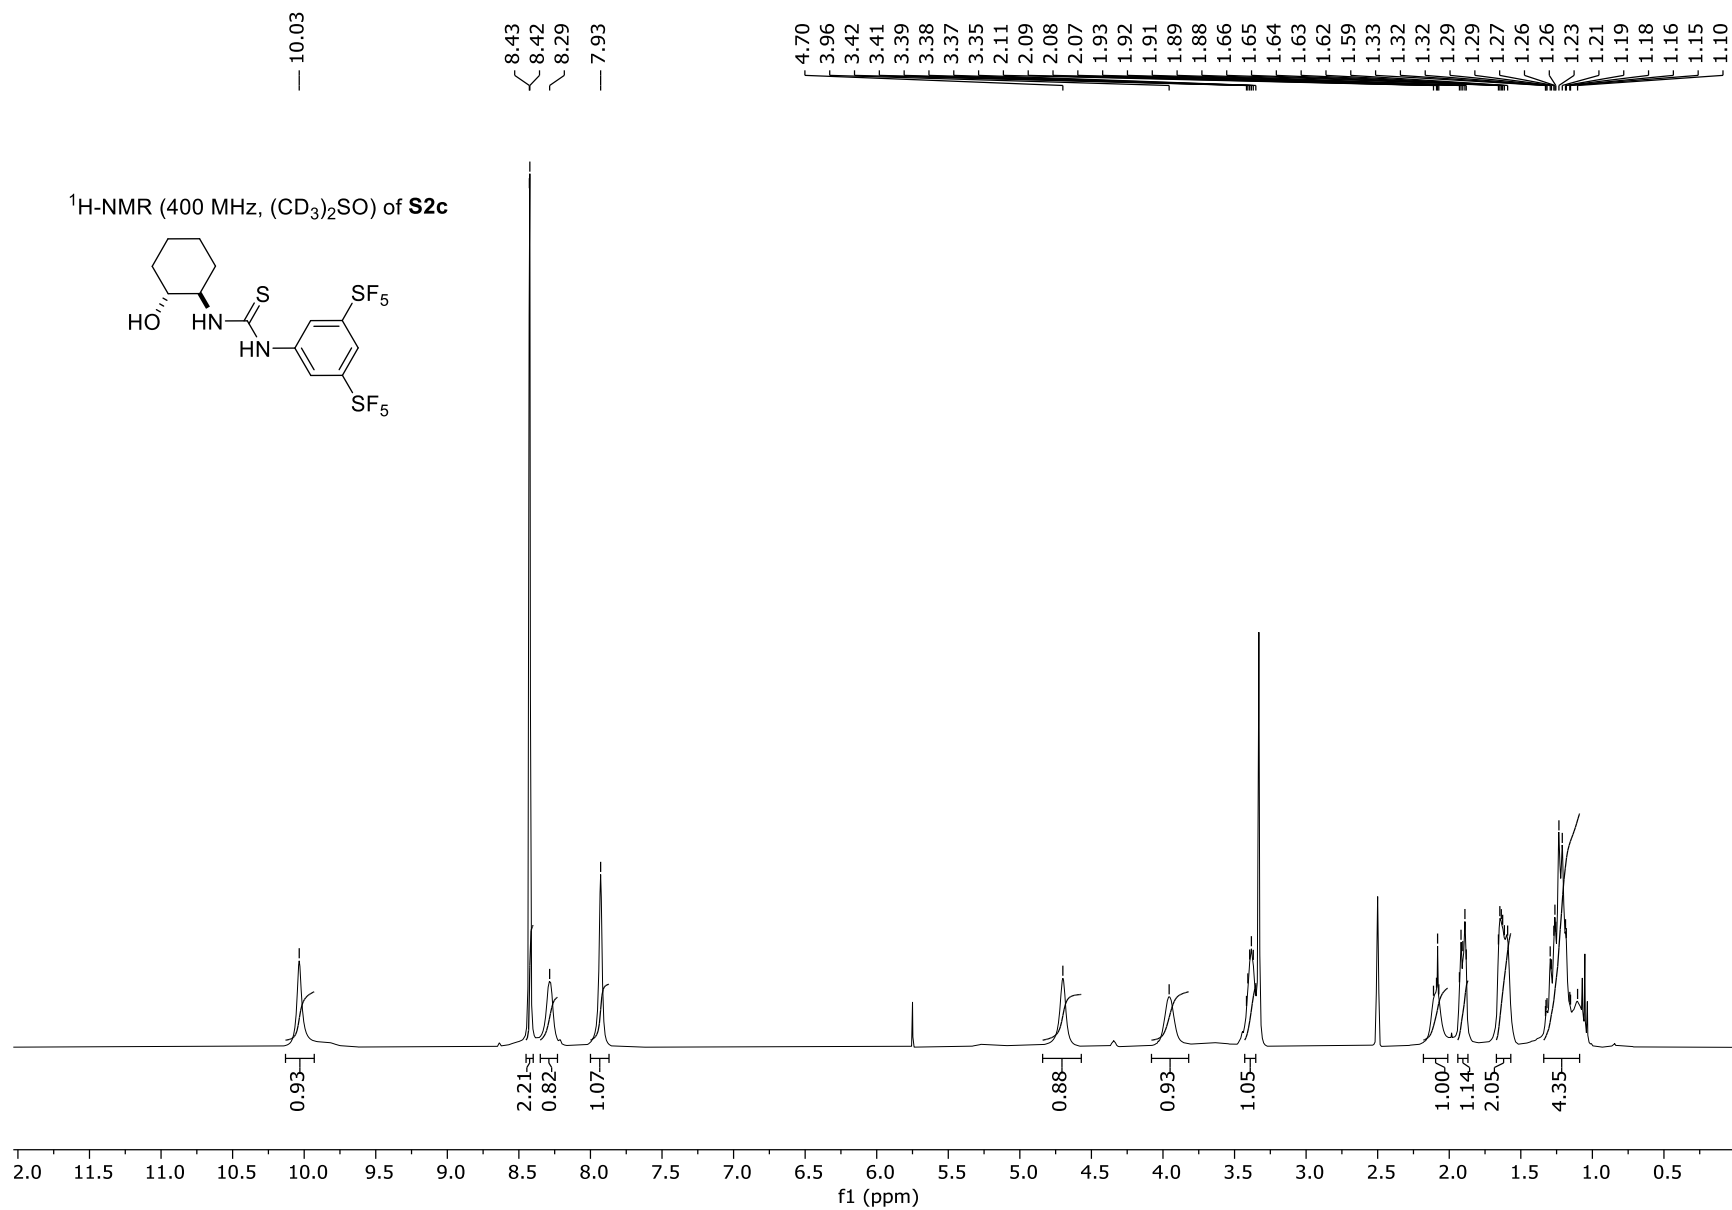

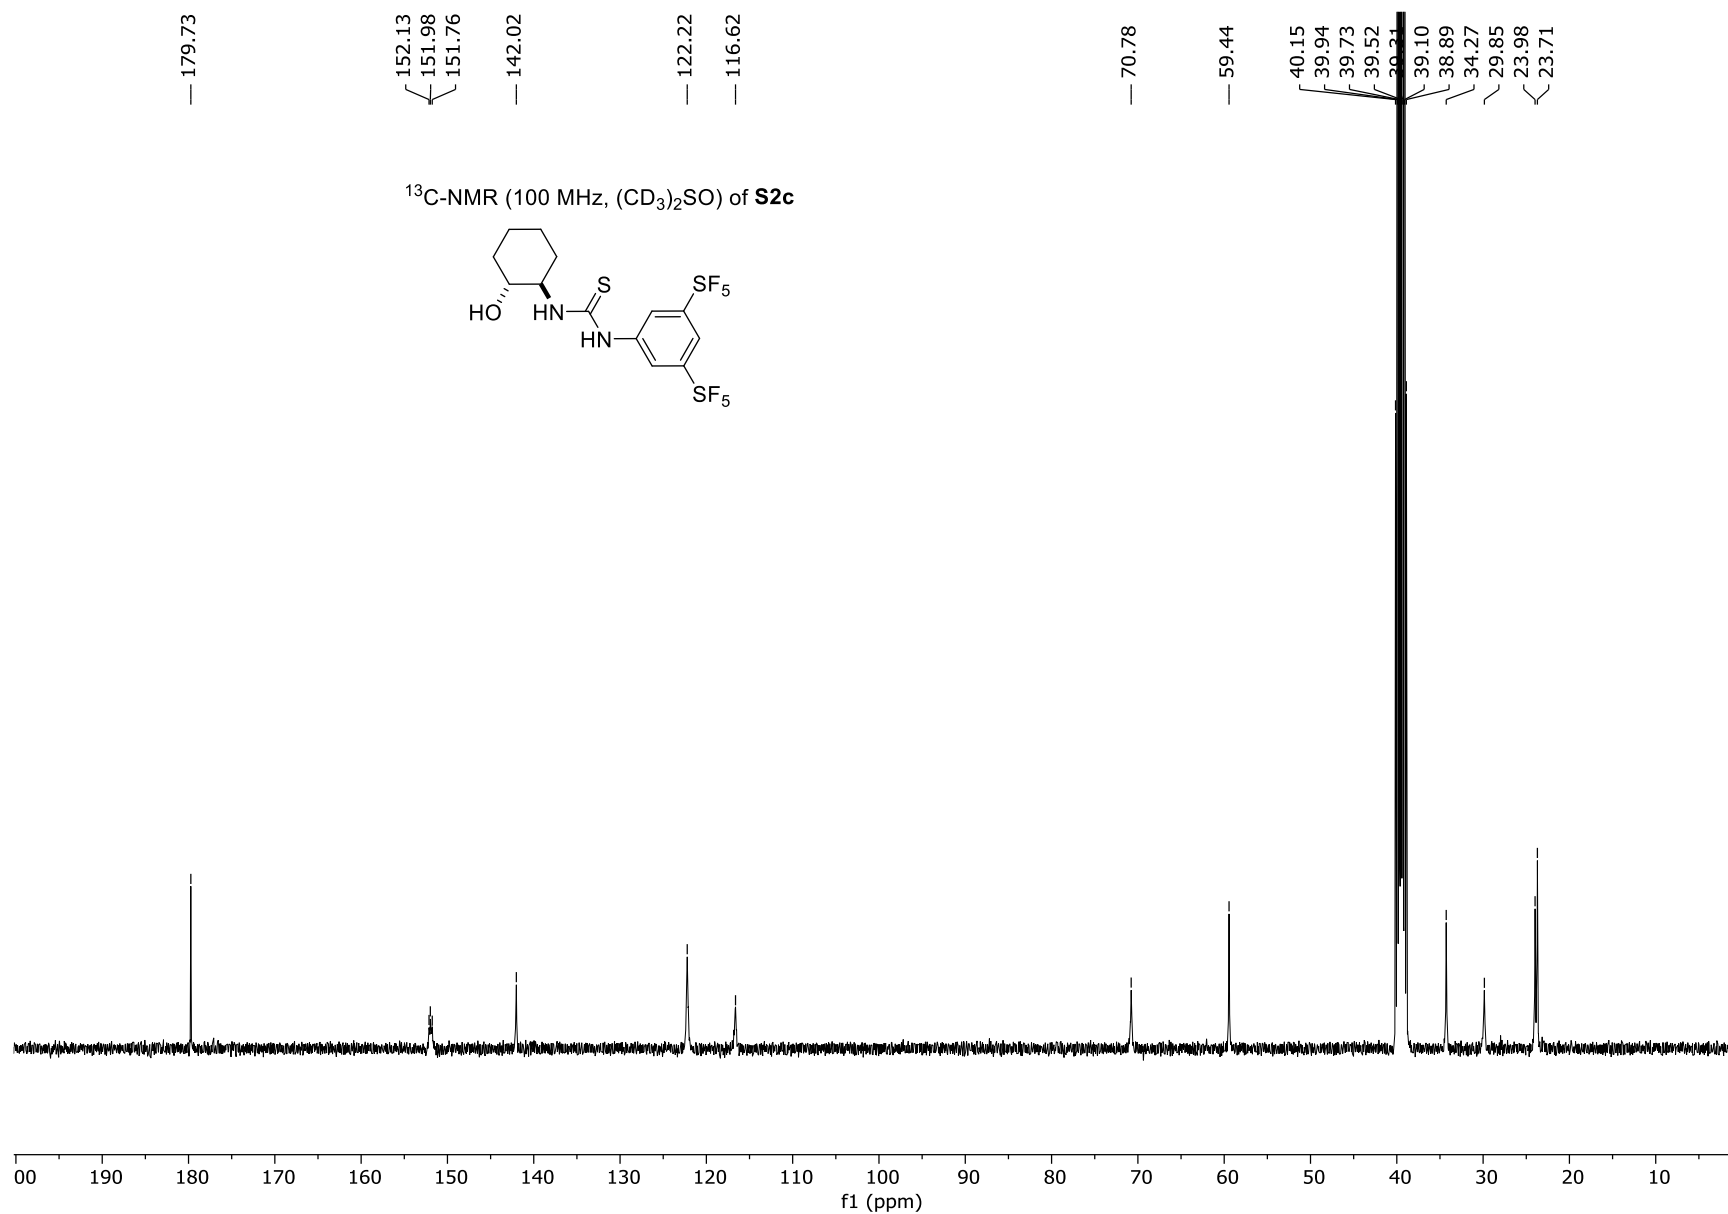

<sup>19</sup>F-NMR (377 MHz, (CD<sub>3</sub>)<sub>2</sub>SO) of **S2c**

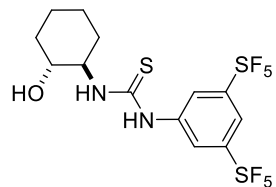

85.29  
84.88  
84.47  
84.07  
83.67

64.12  
63.72

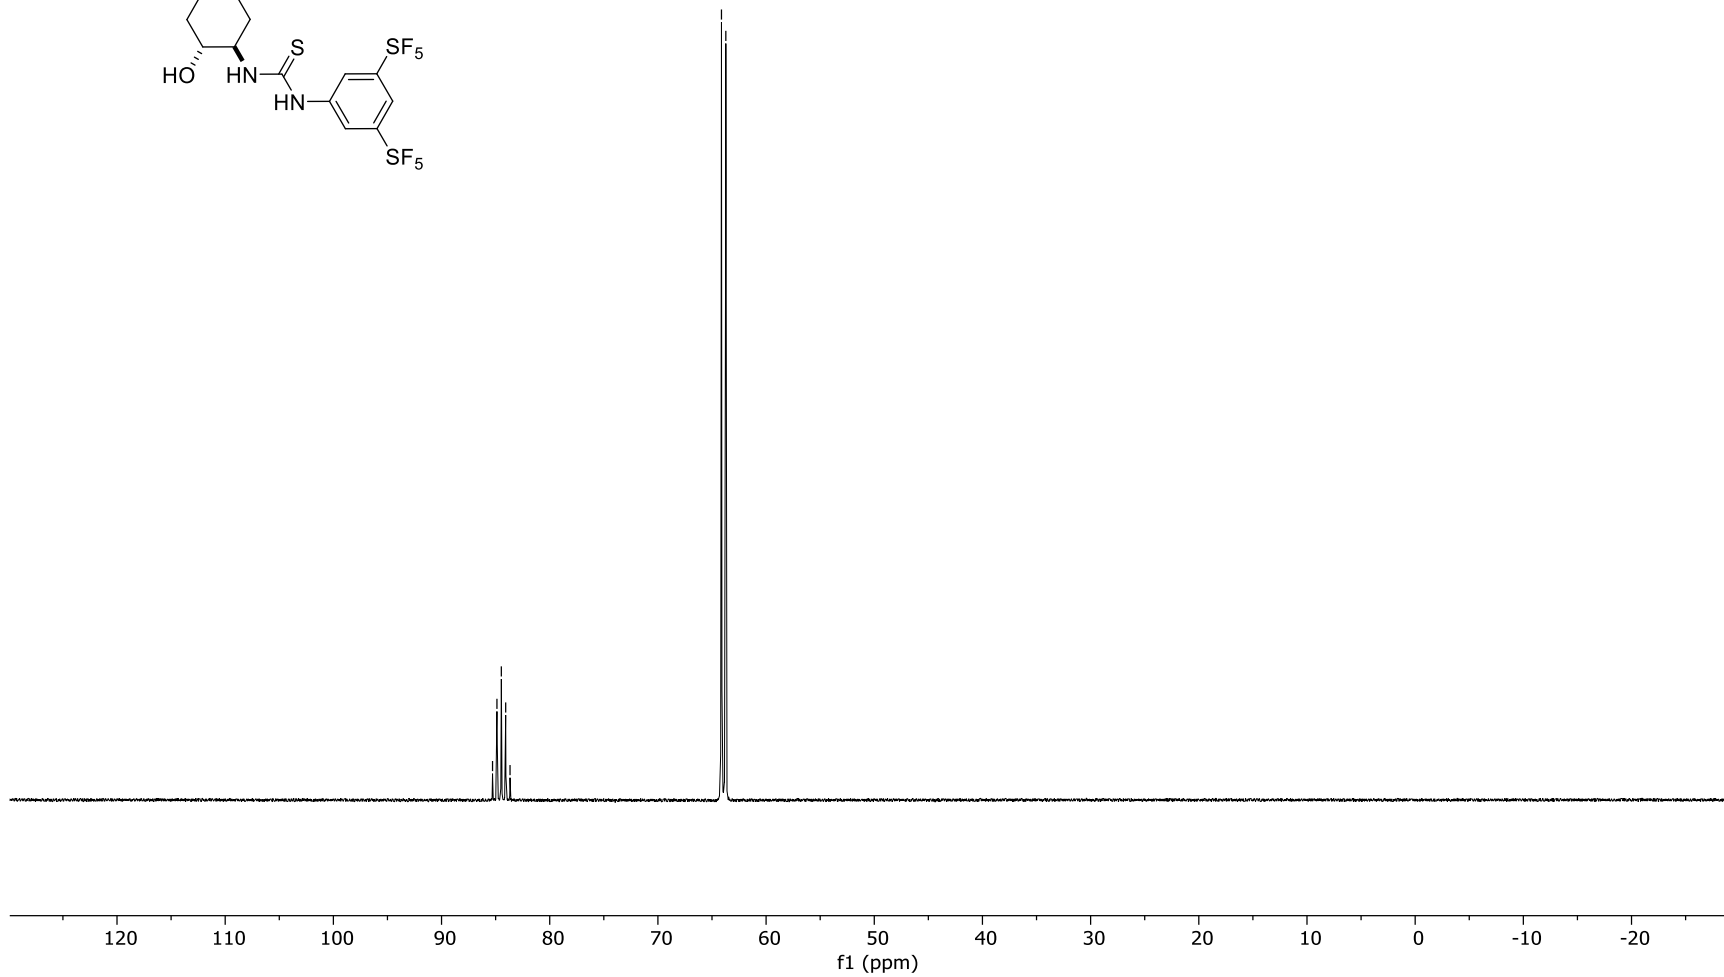



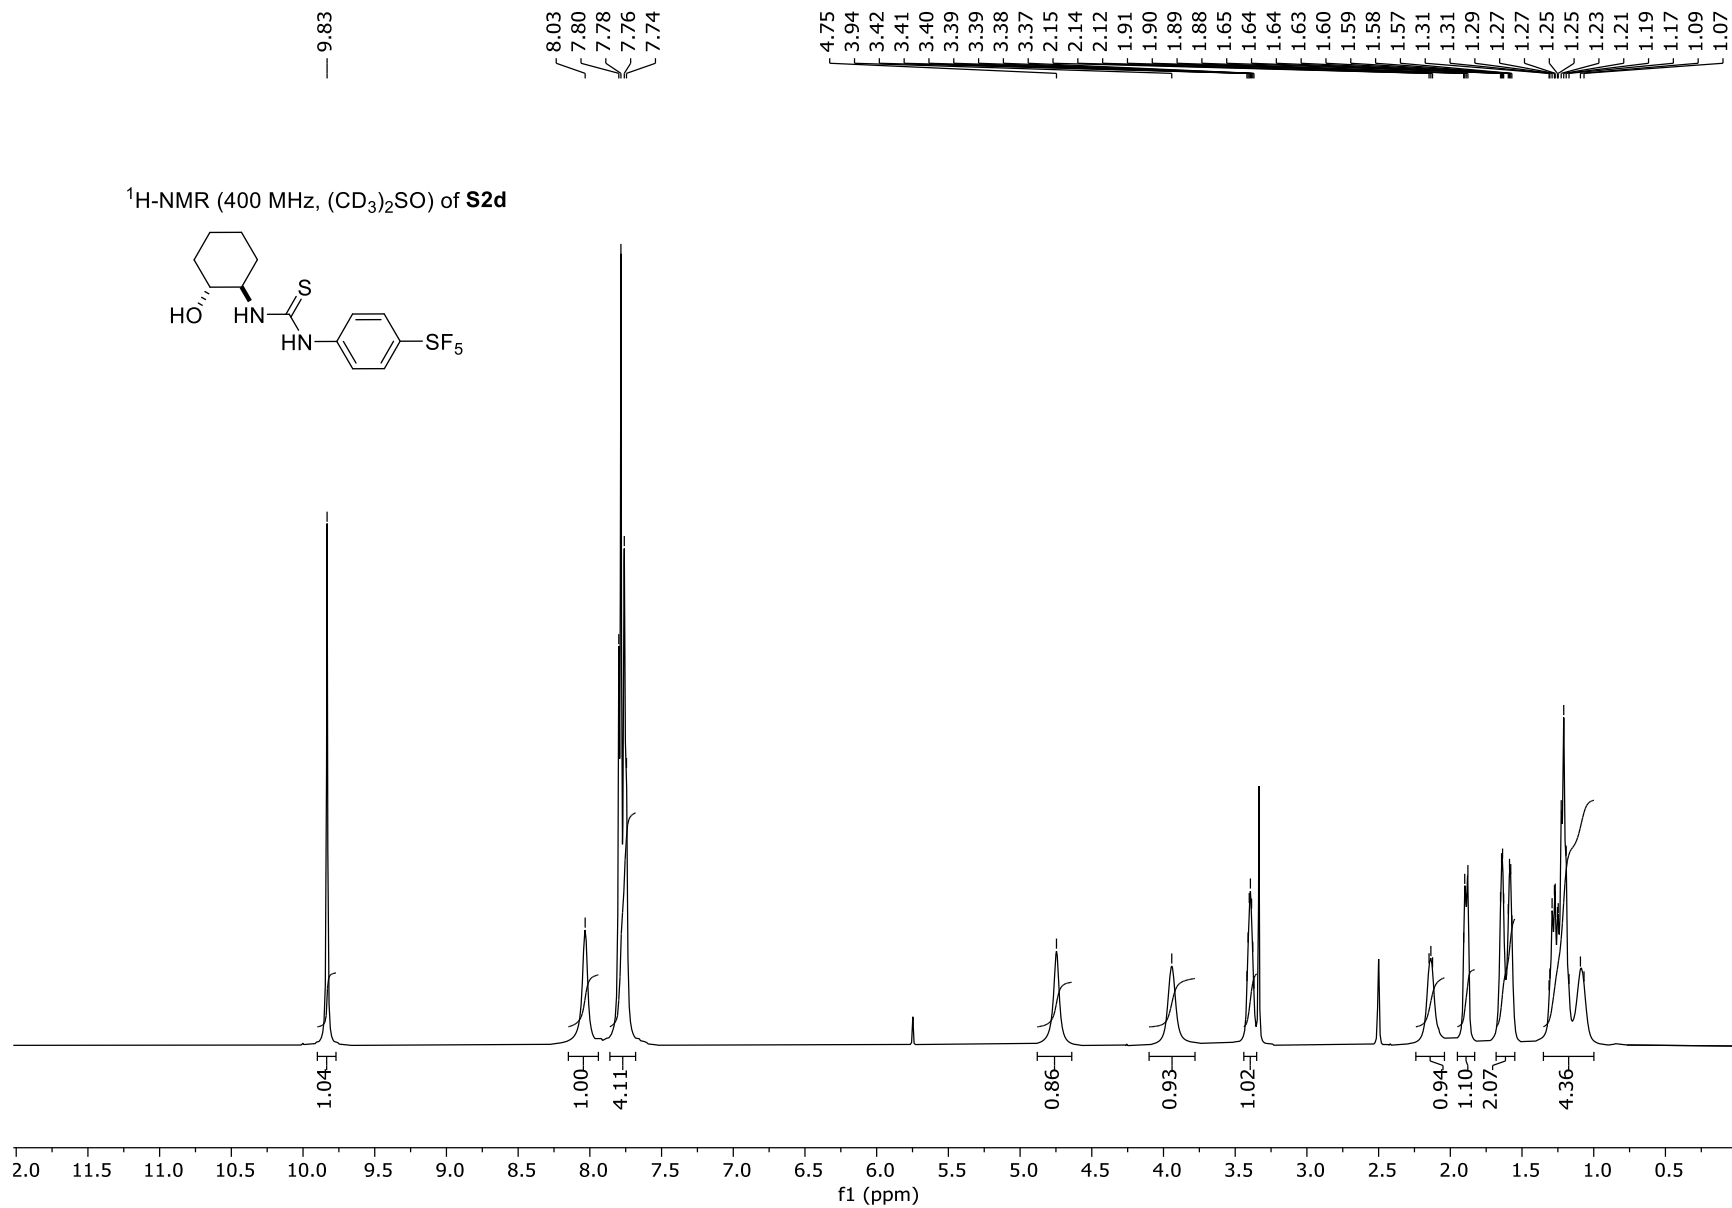

<sup>13</sup>C-NMR (150 MHz, (CD<sub>3</sub>)<sub>2</sub>SO) of **S2d**

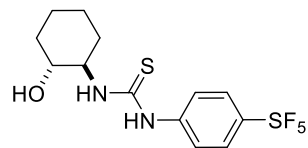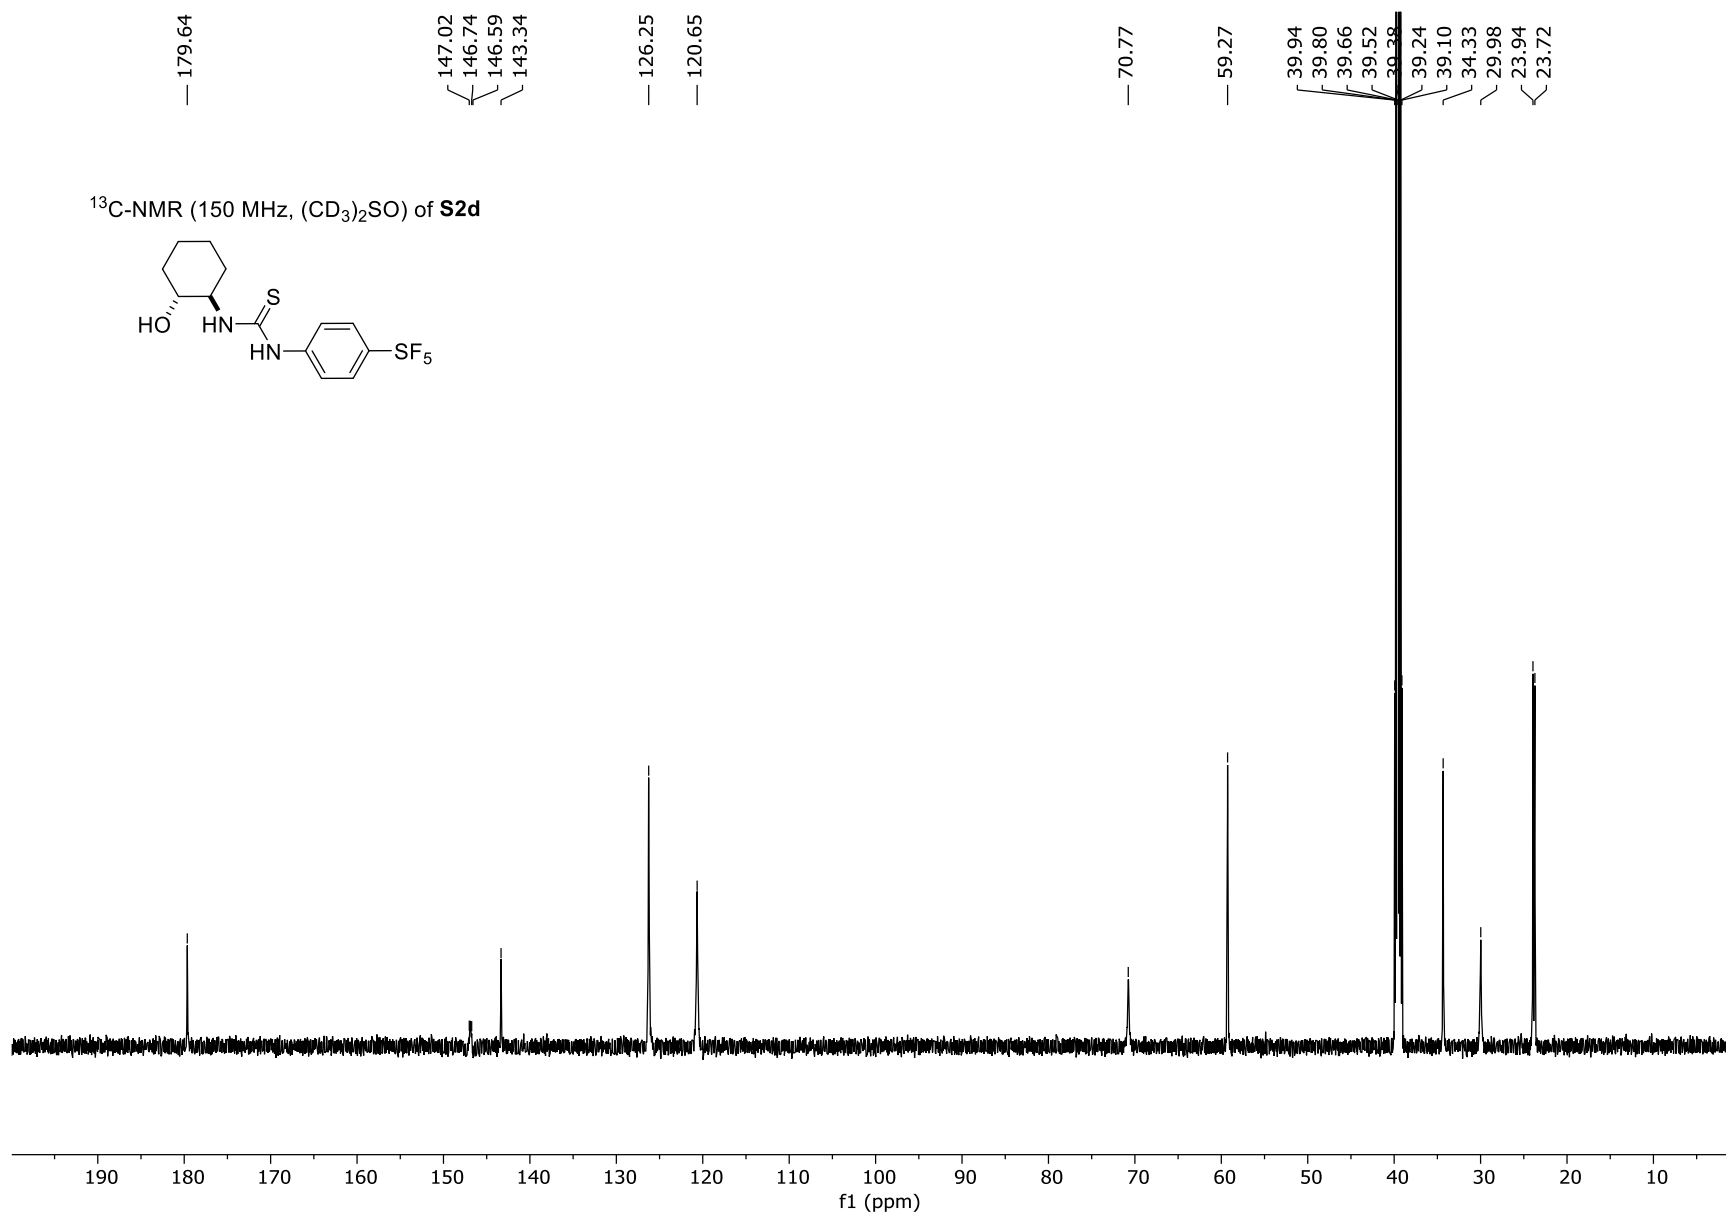

<sup>19</sup>F-NMR (565 MHz, (CD<sub>3</sub>)<sub>2</sub>SO) of **S2d**

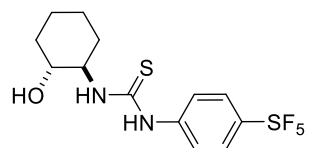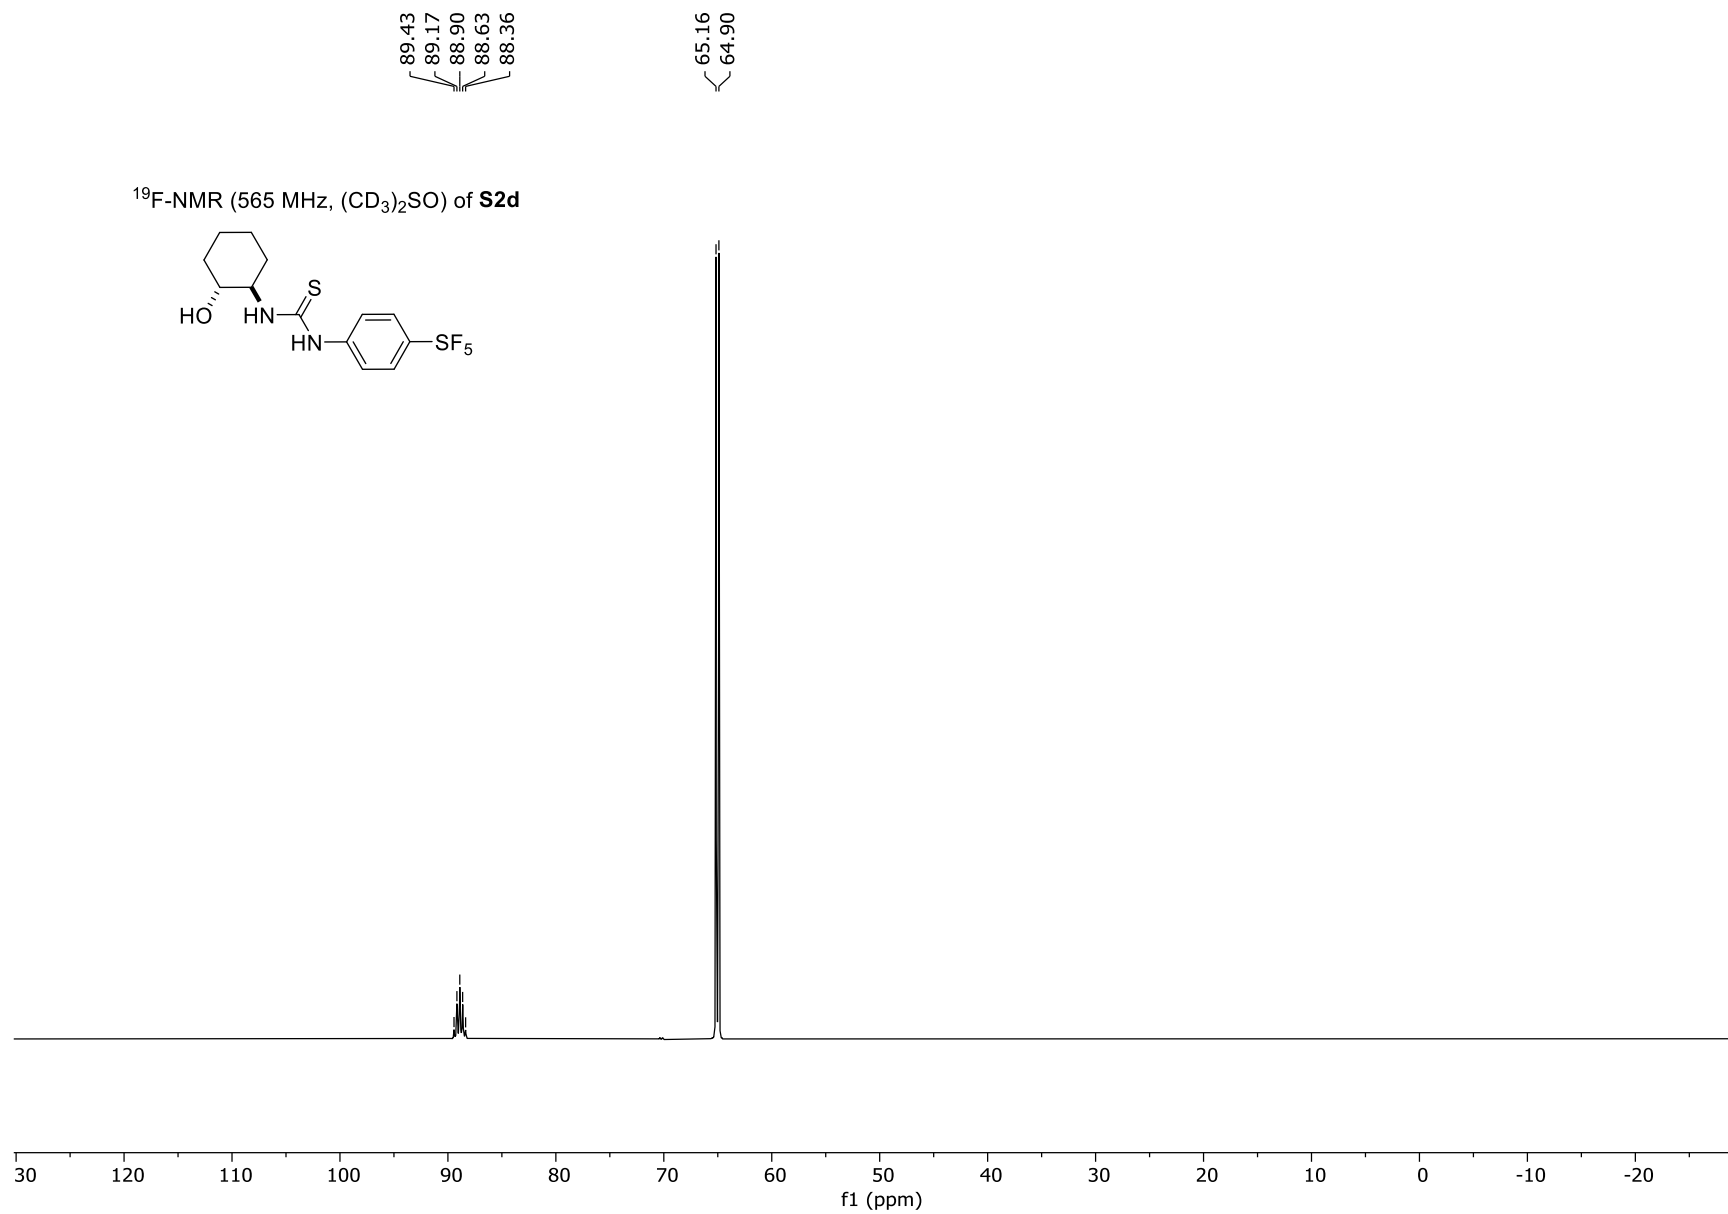

<sup>1</sup>H-NMR (400 MHz, (CD<sub>3</sub>)<sub>2</sub>SO) of **S2e**

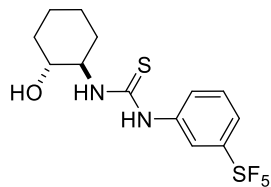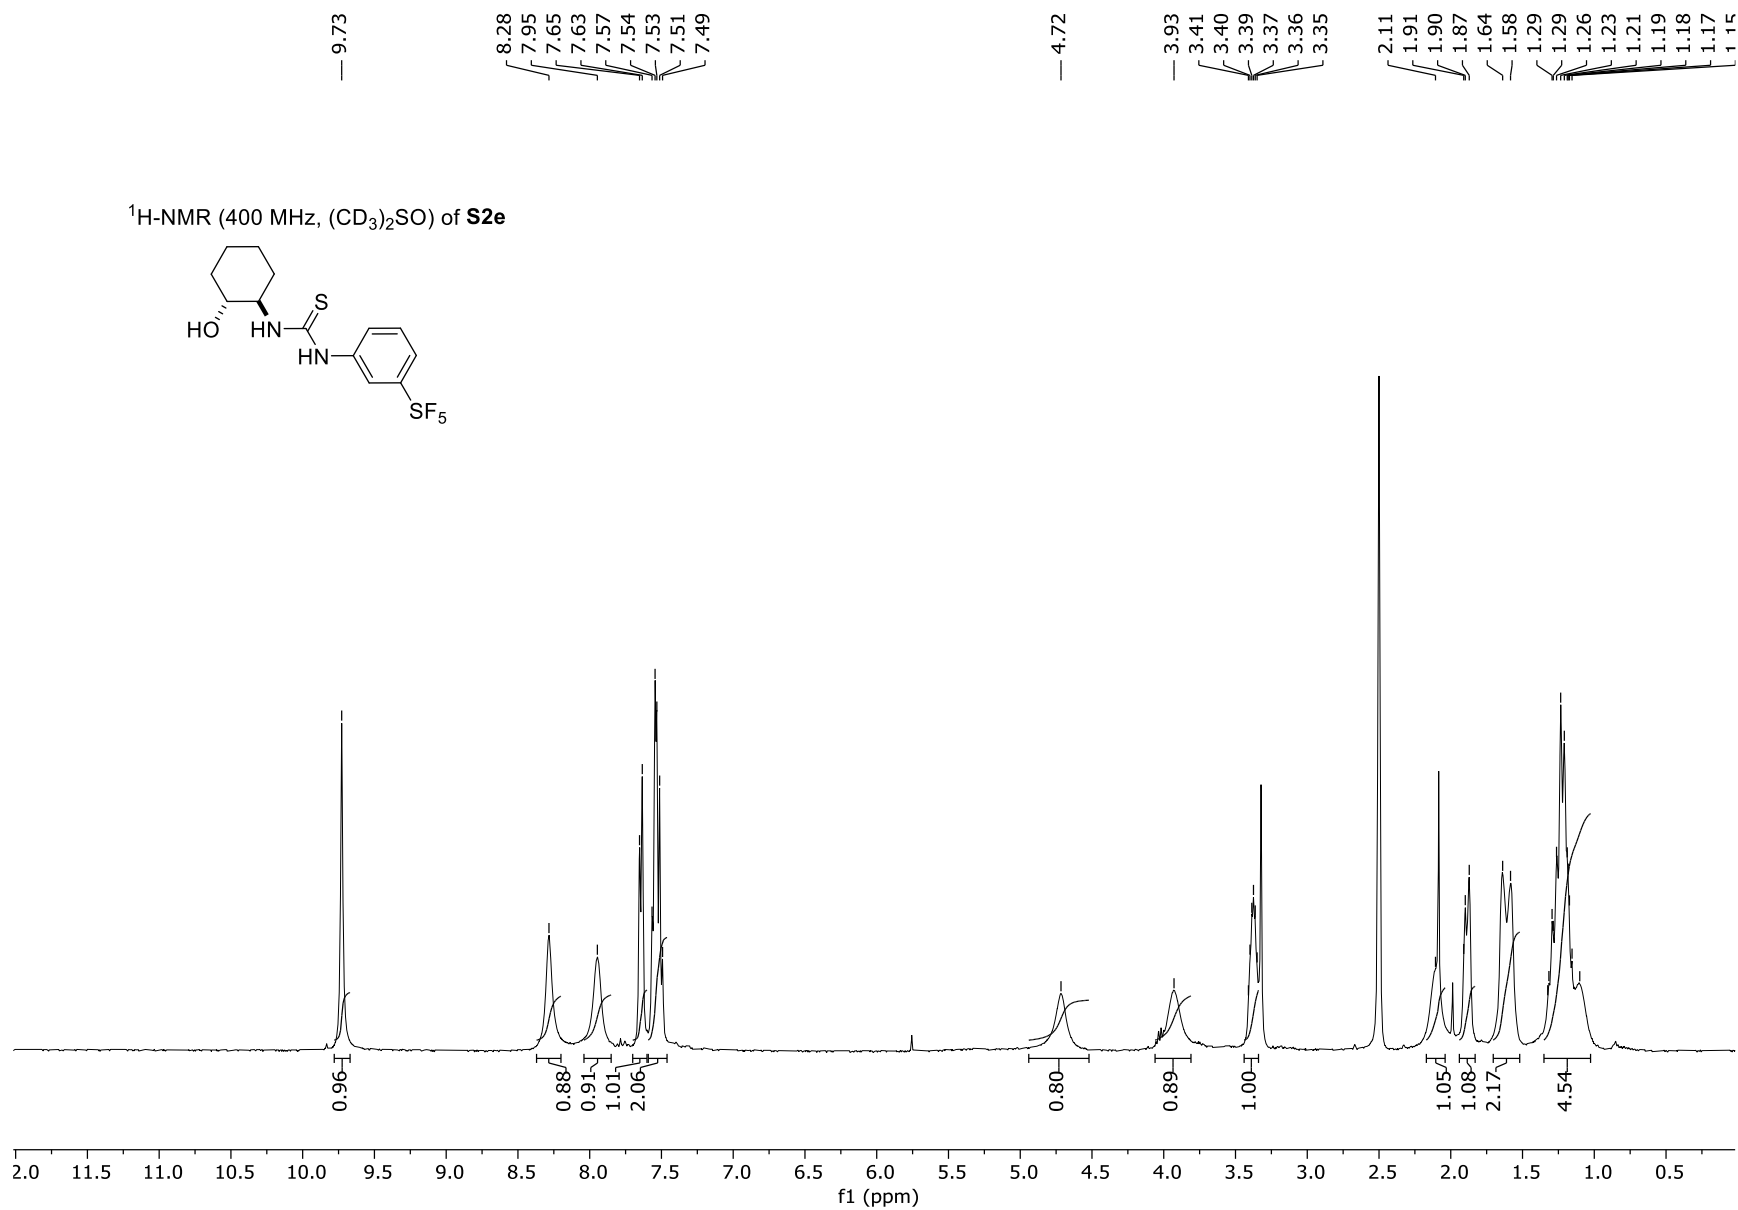

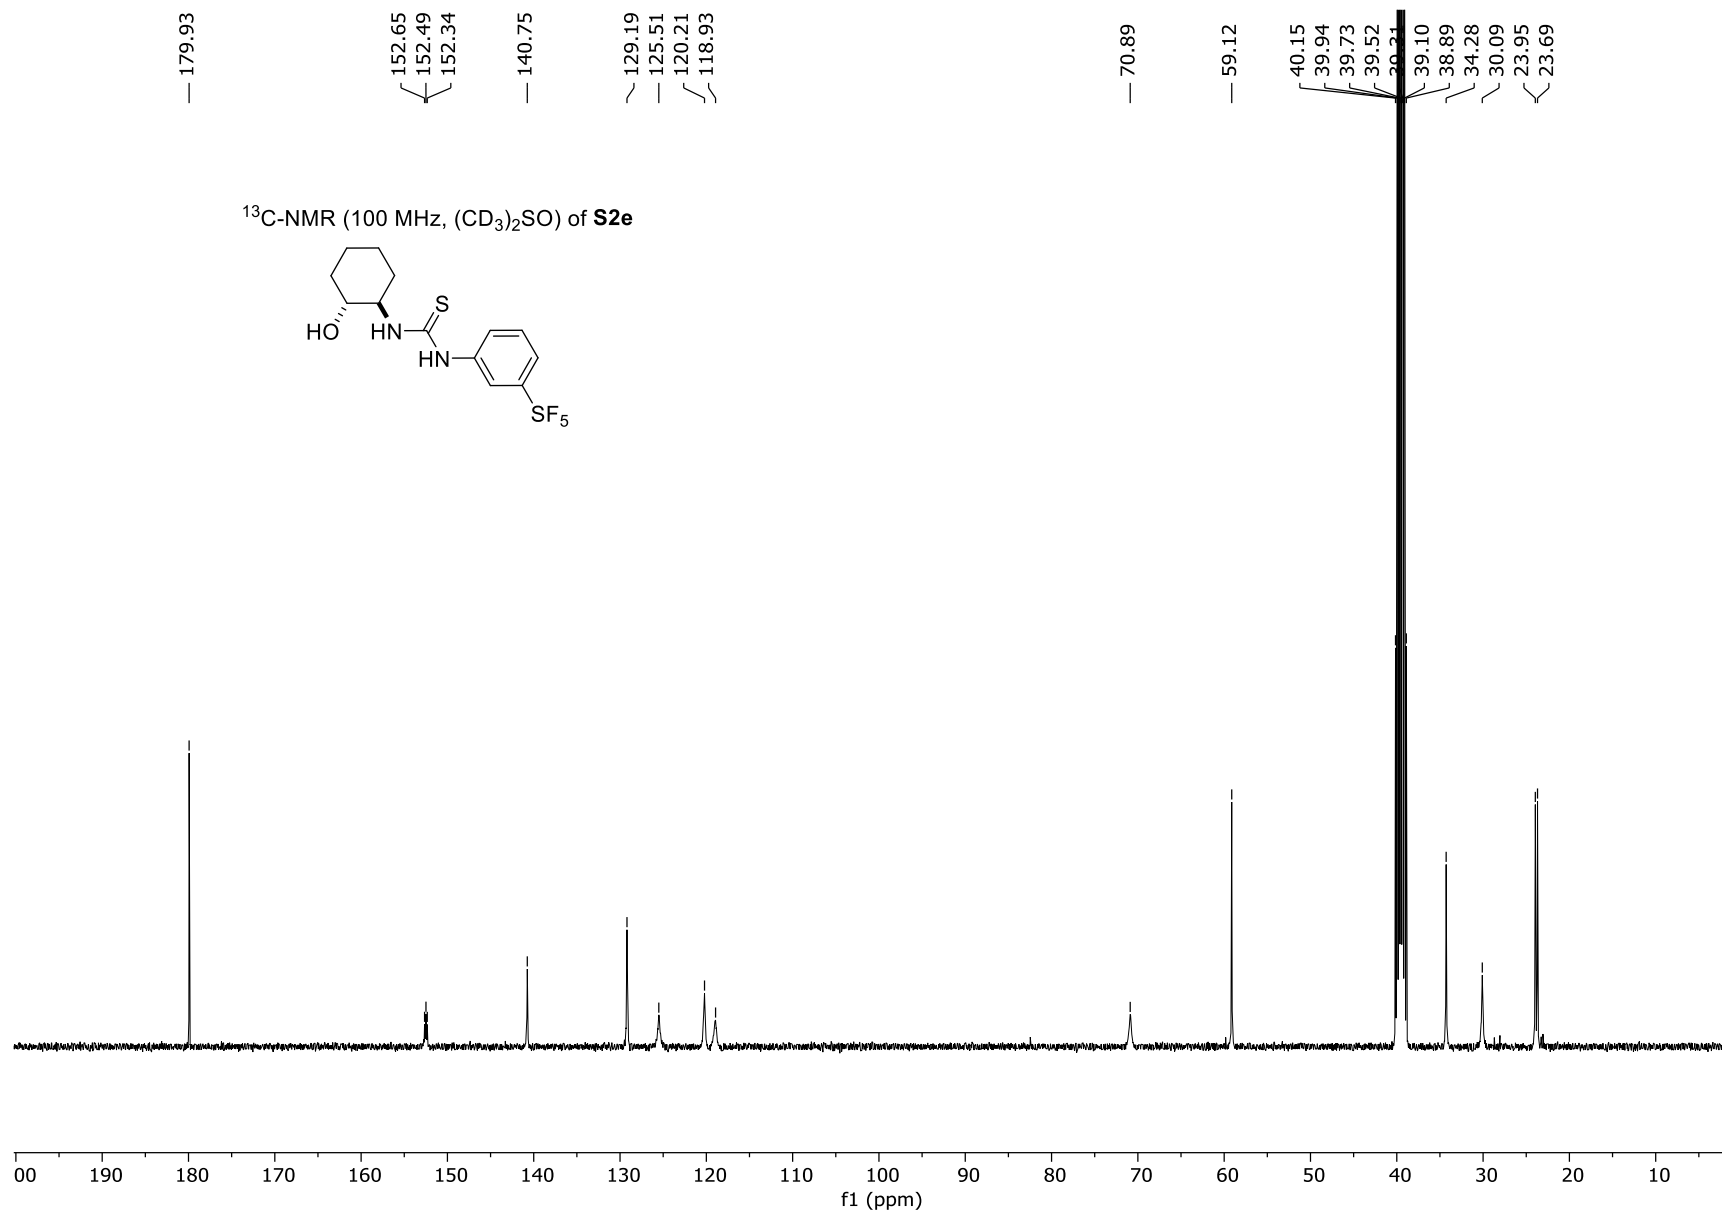

<sup>19</sup>F-NMR (565 MHz, (CD<sub>3</sub>)<sub>2</sub>SO) of **S2e**

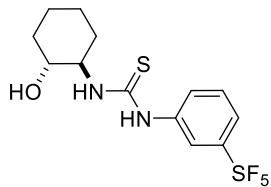

88.07  
87.80  
87.53  
87.26  
87.00

63.87  
63.60

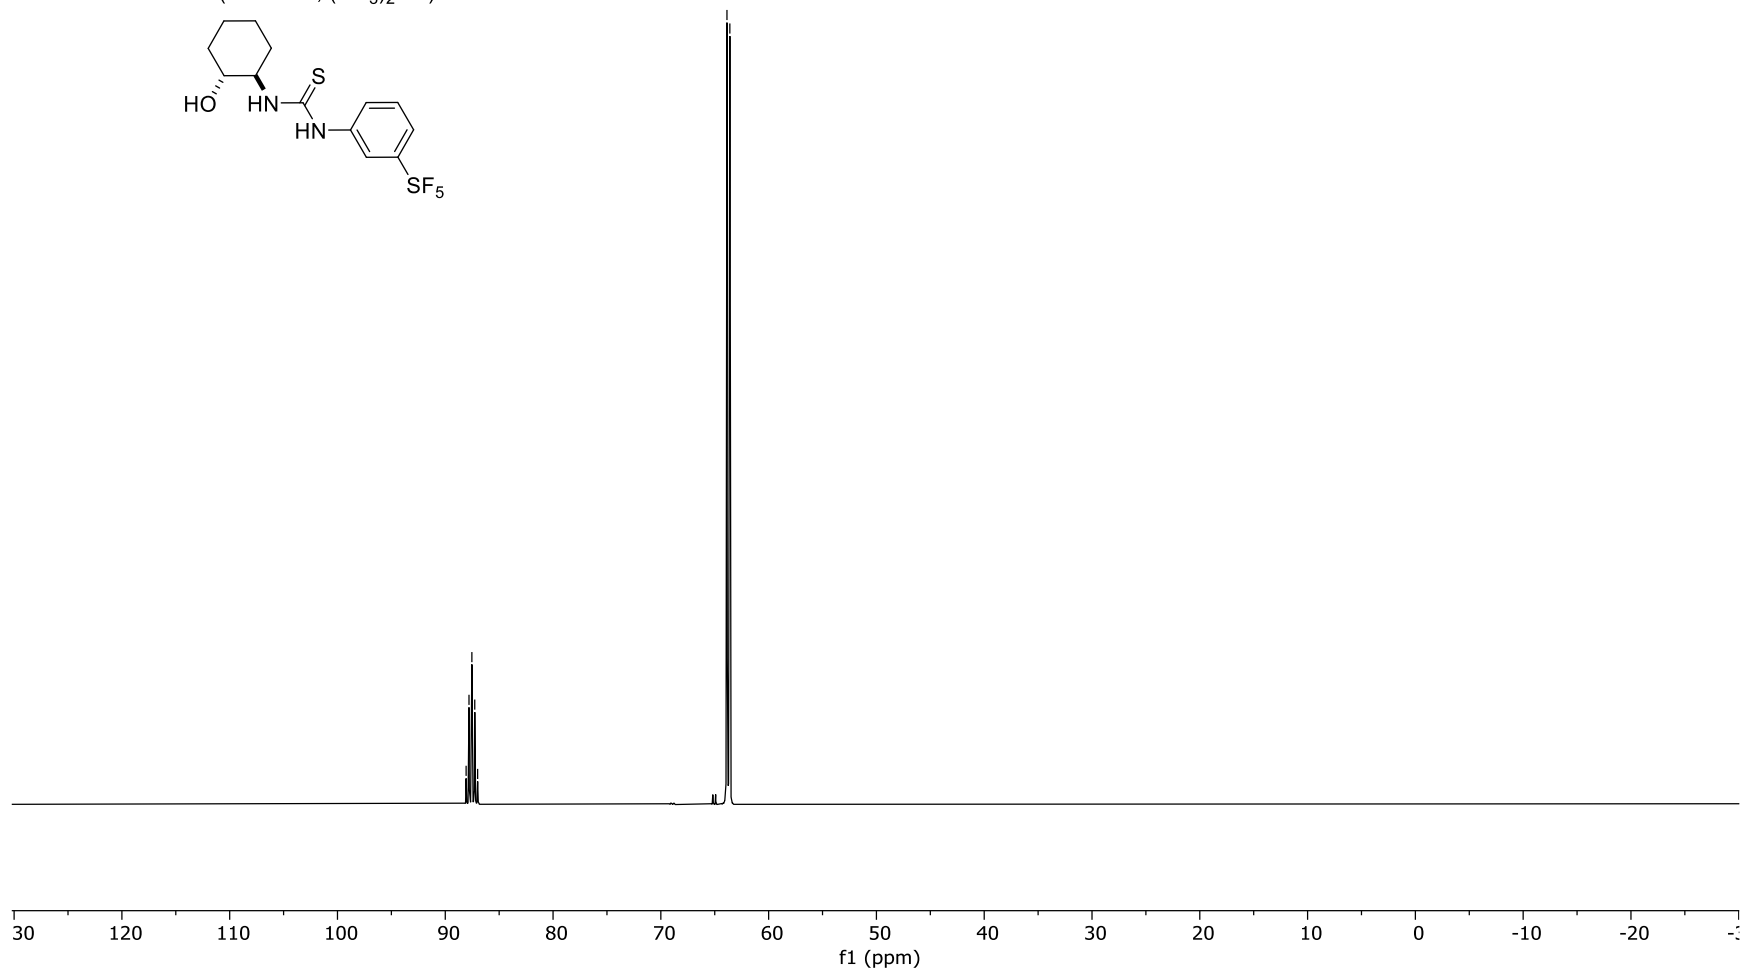

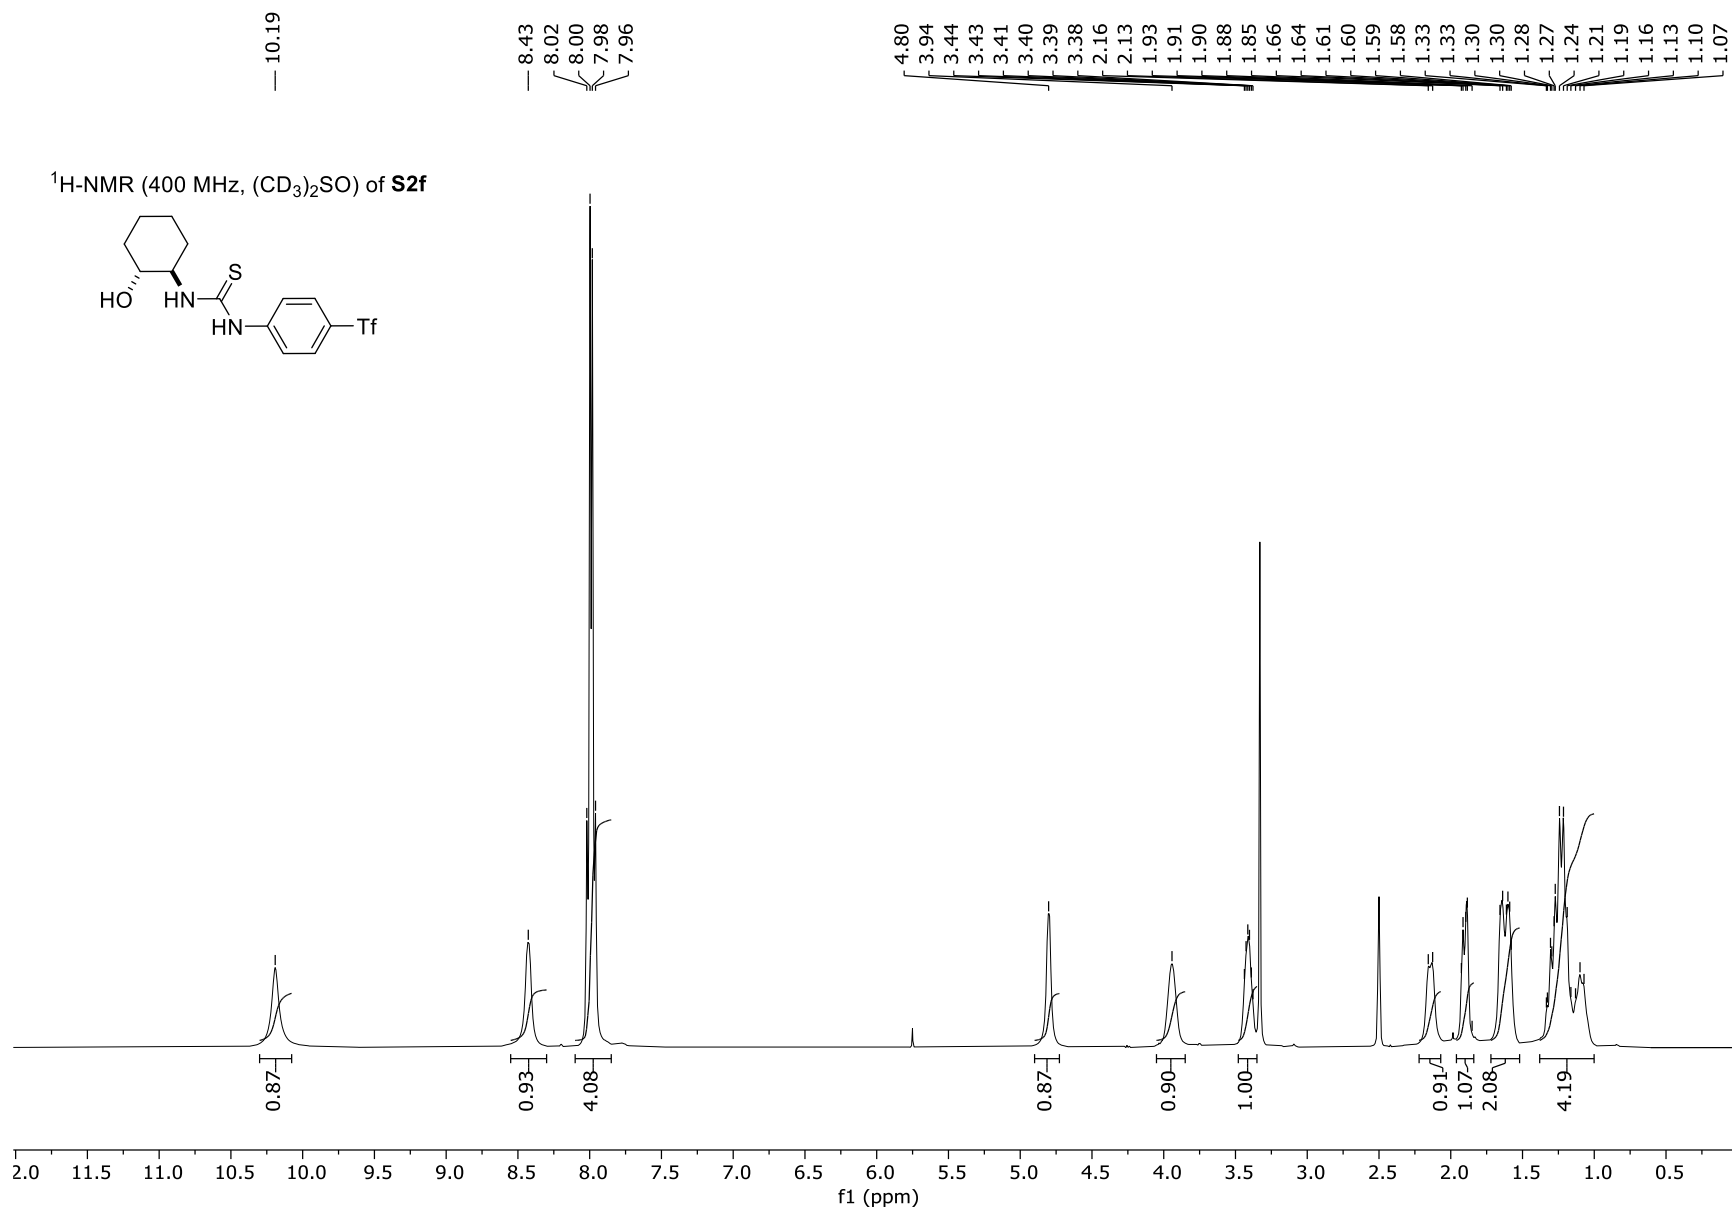

<sup>13</sup>C-NMR (100 MHz, (CD<sub>3</sub>)<sub>2</sub>SO) of **S2f**

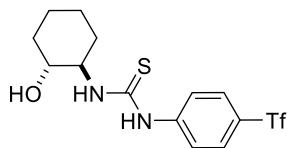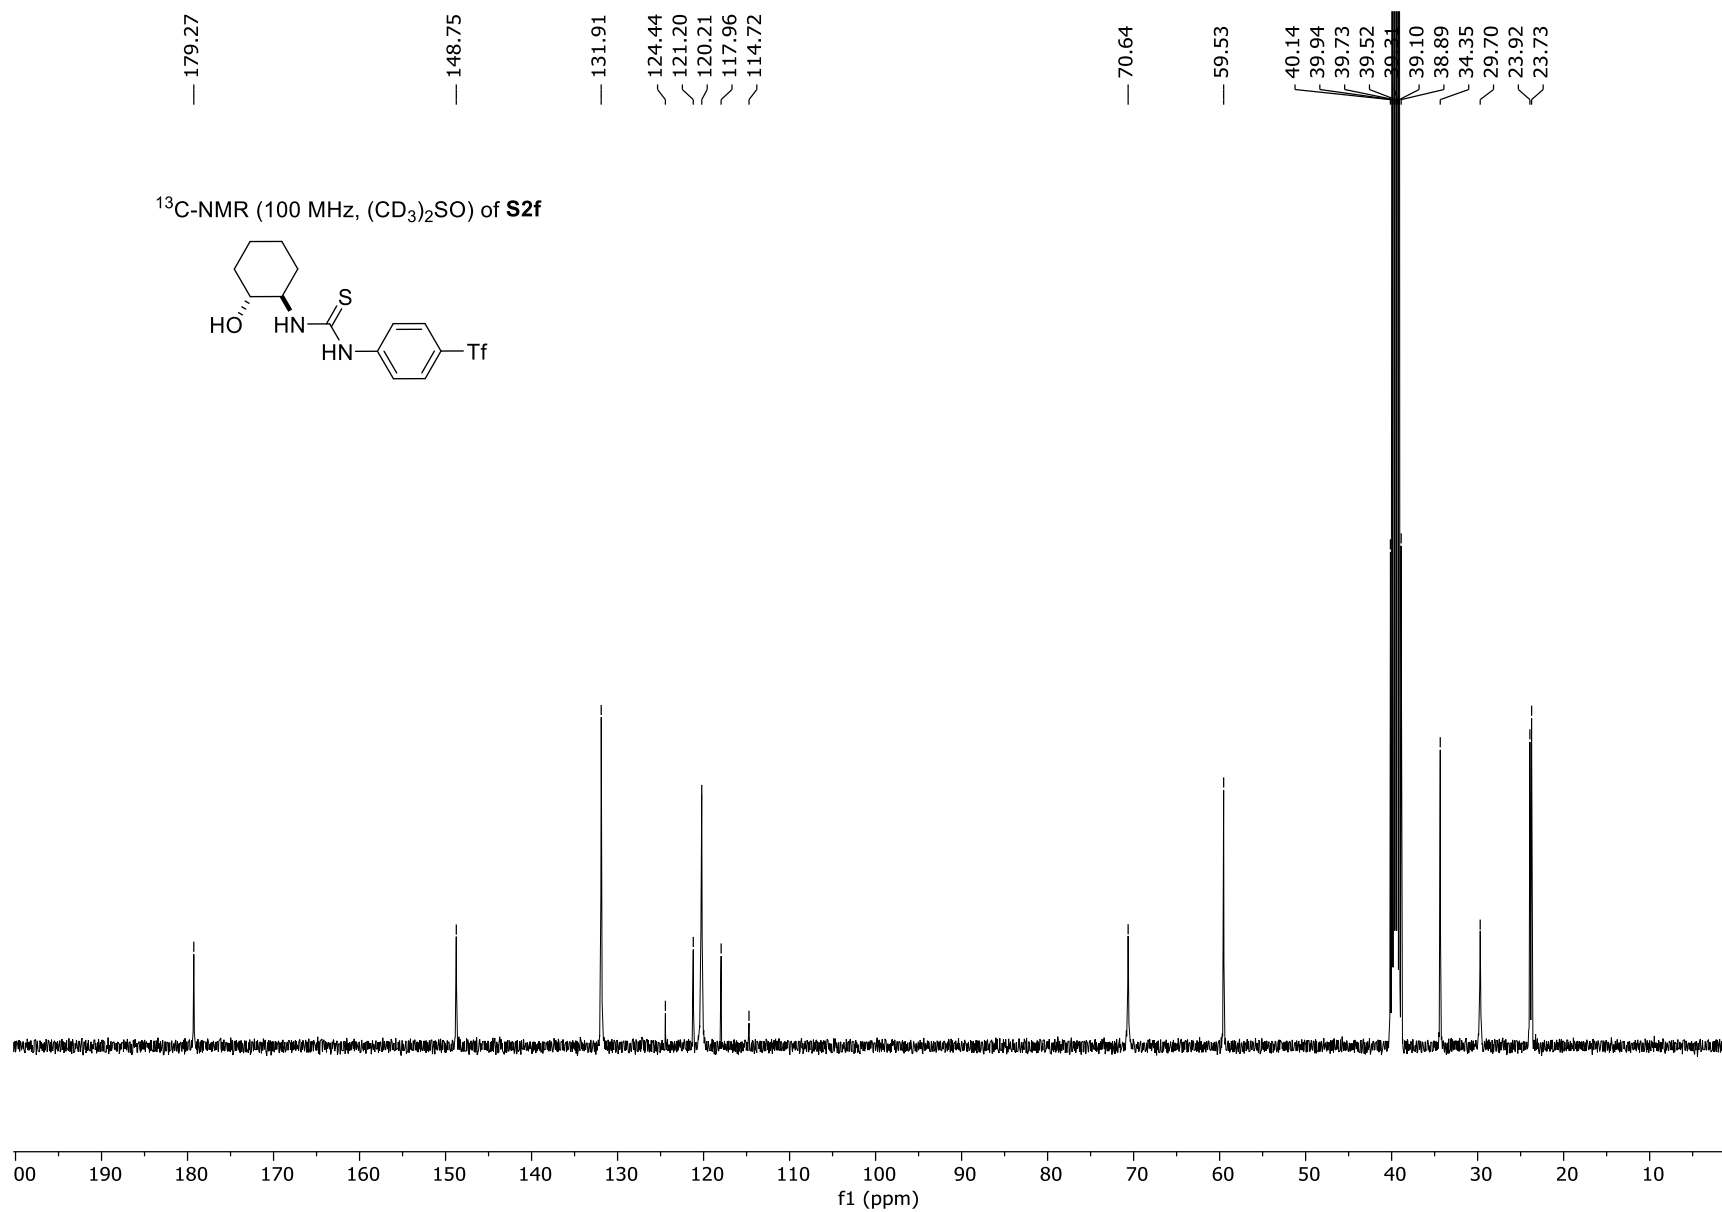



$^{19}\text{F}$ -NMR (377 MHz,  $(\text{CD}_3)_2\text{SO}$ ) of **S2f**

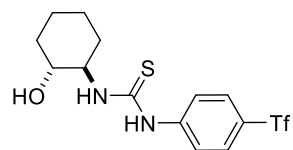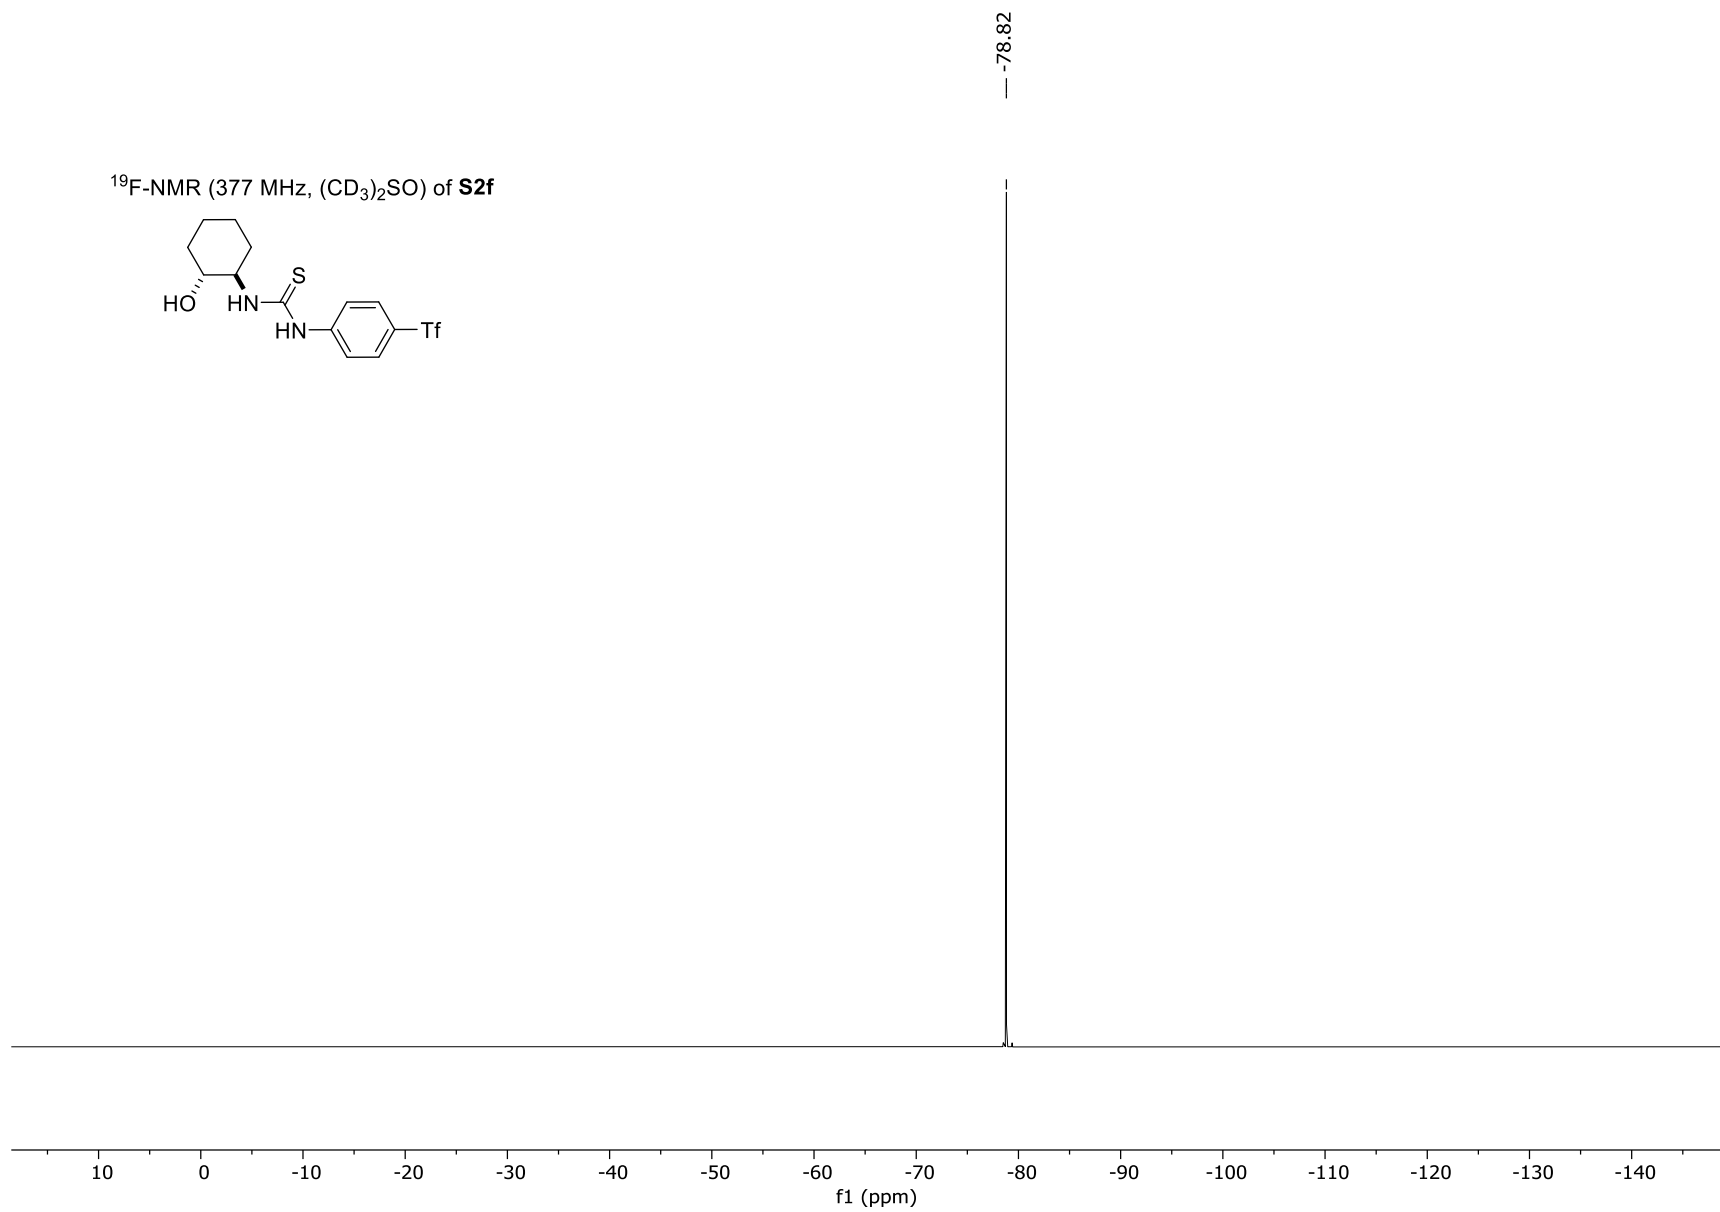

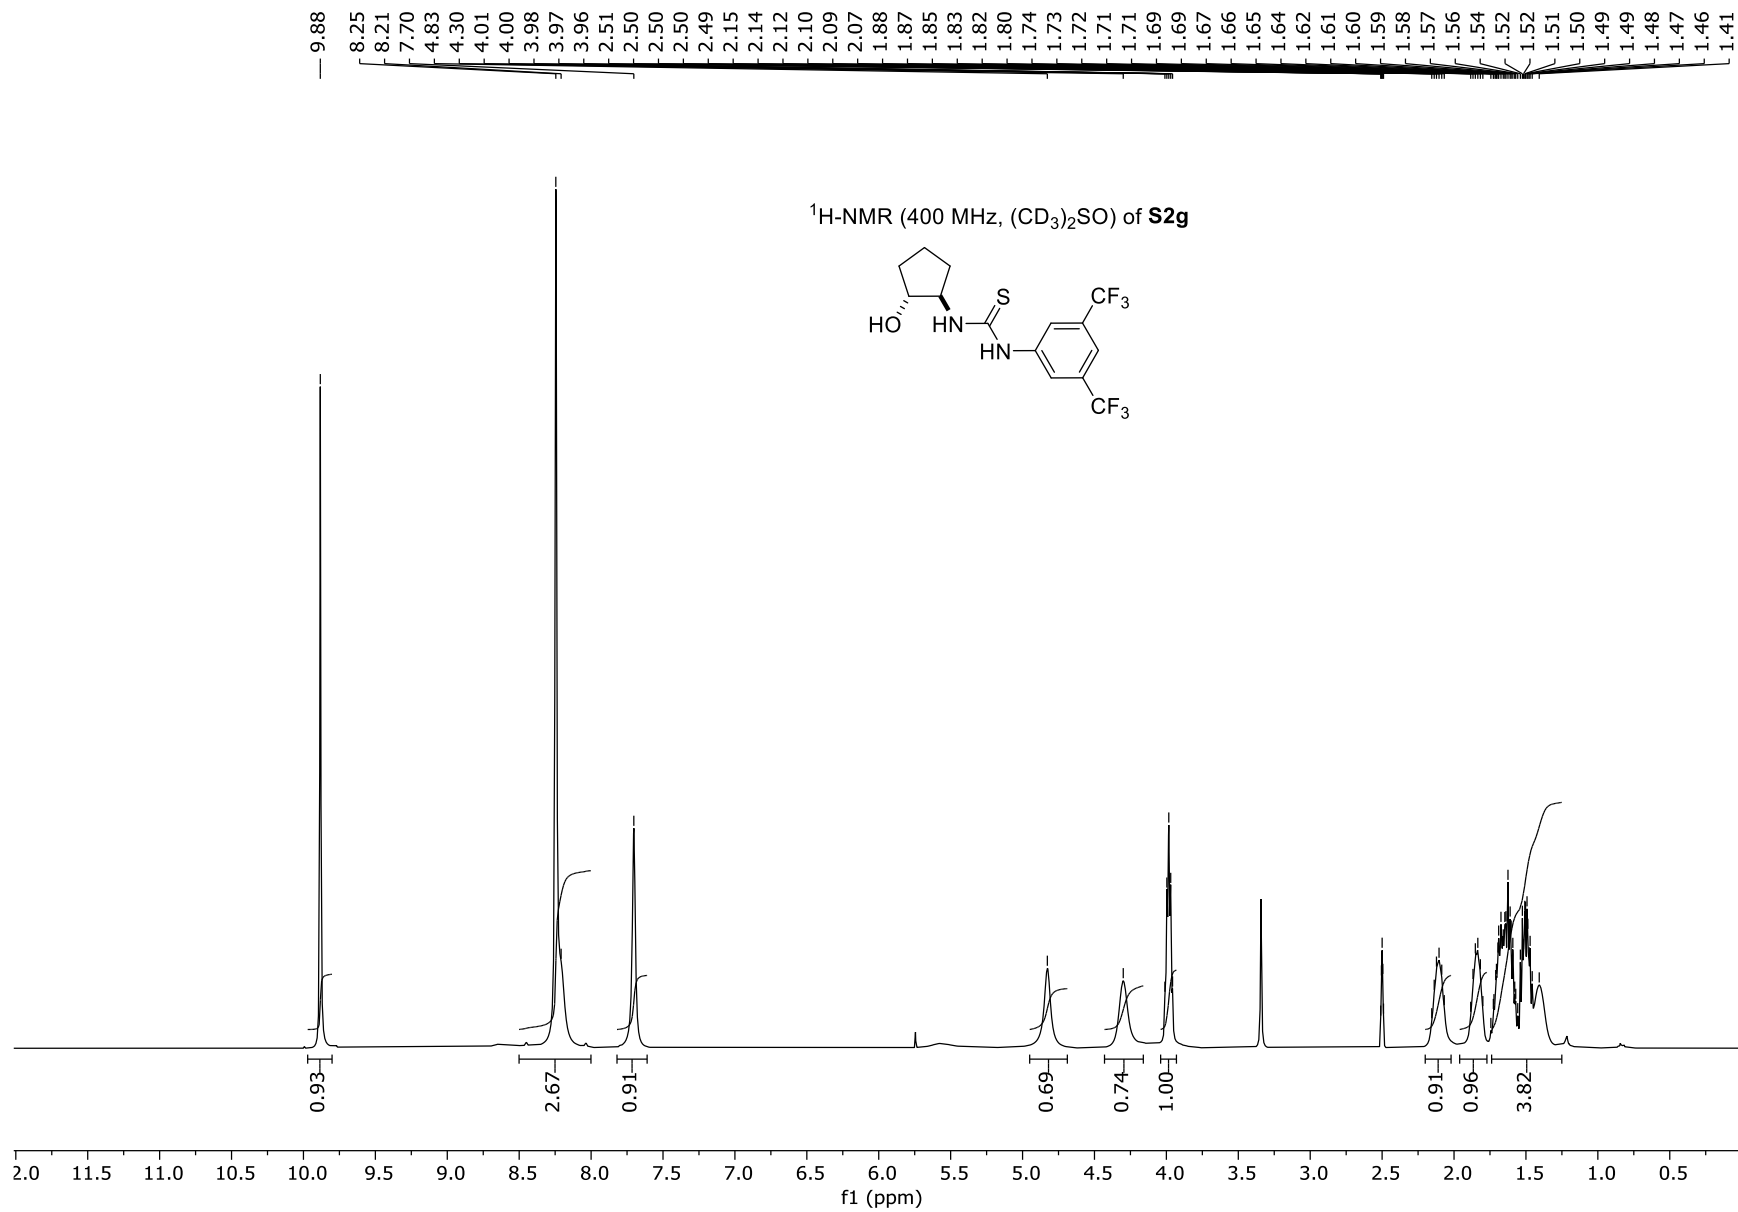

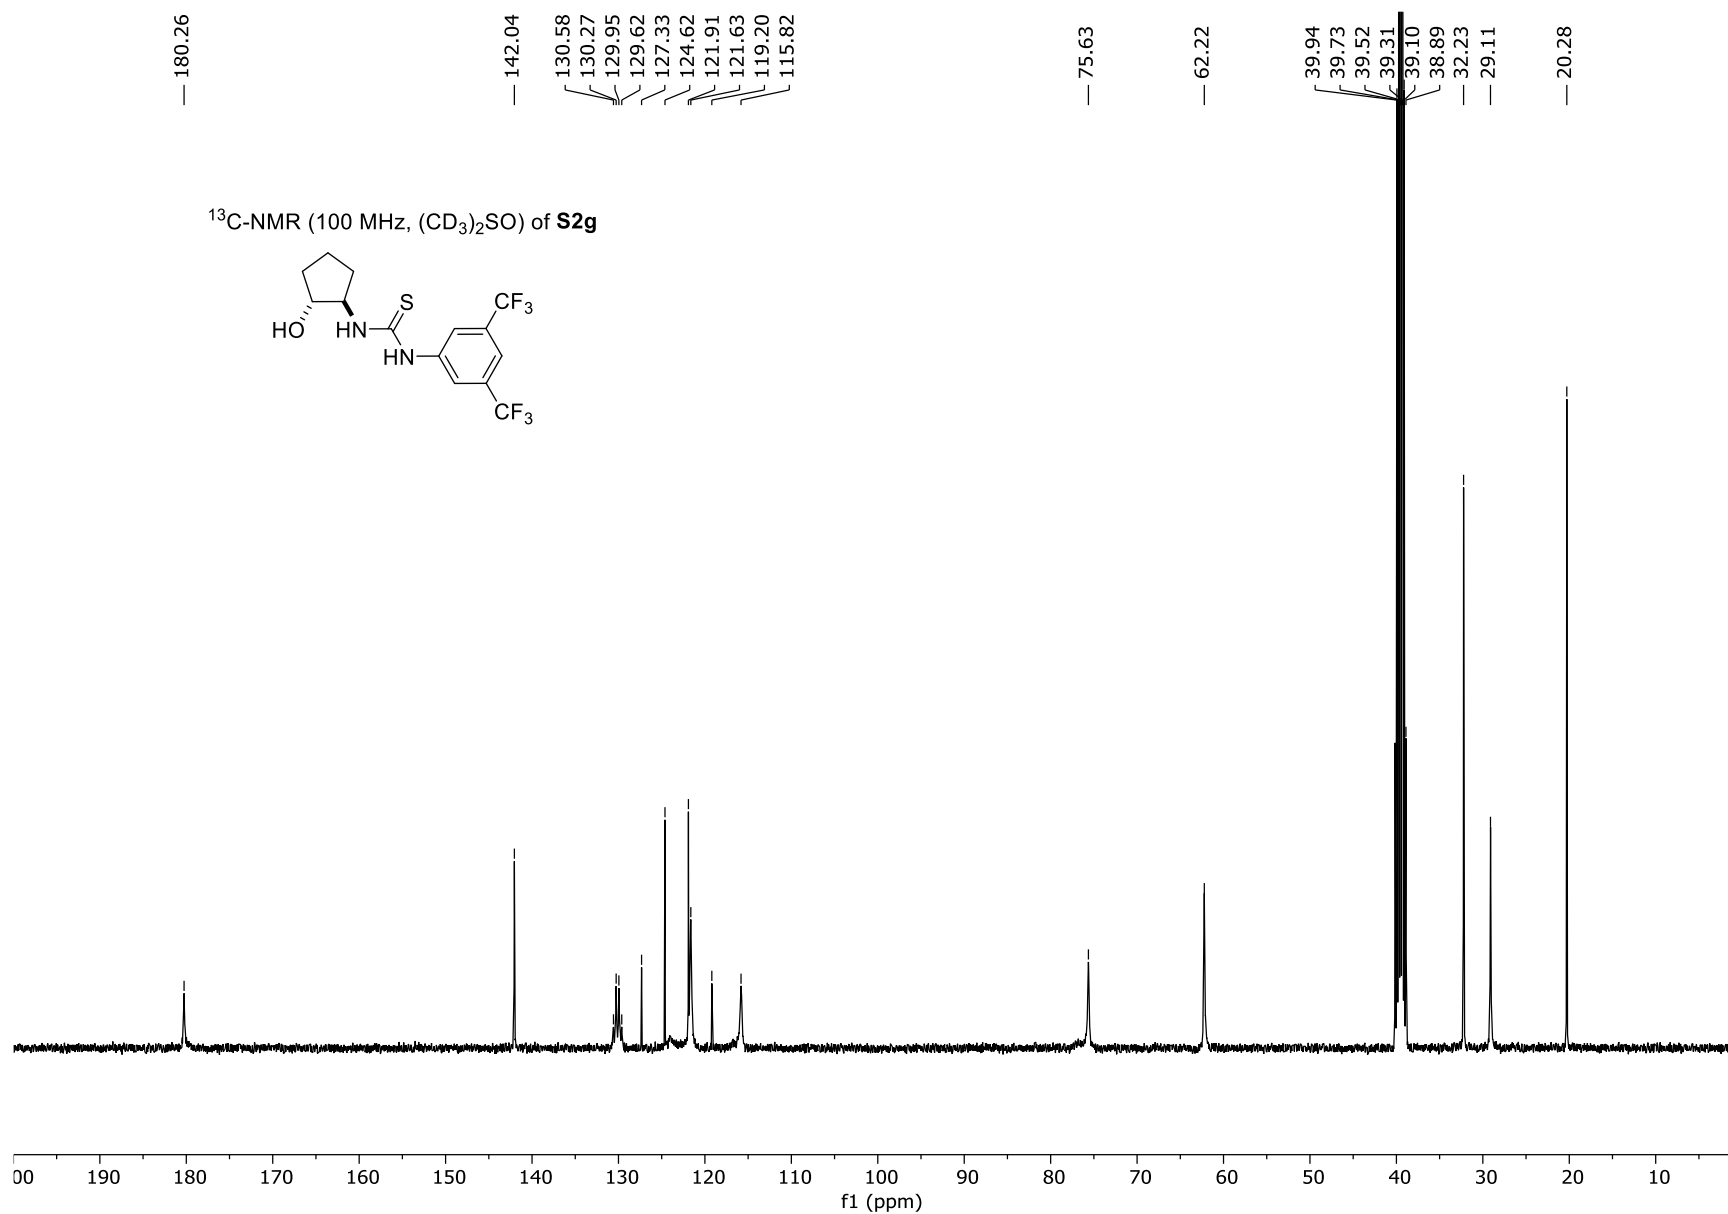

$^{19}\text{F}$ -NMR (565 MHz,  $(\text{CD}_3)_2\text{SO}$ ) of **S2g**

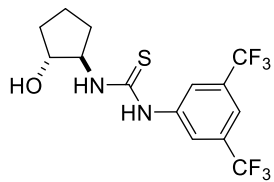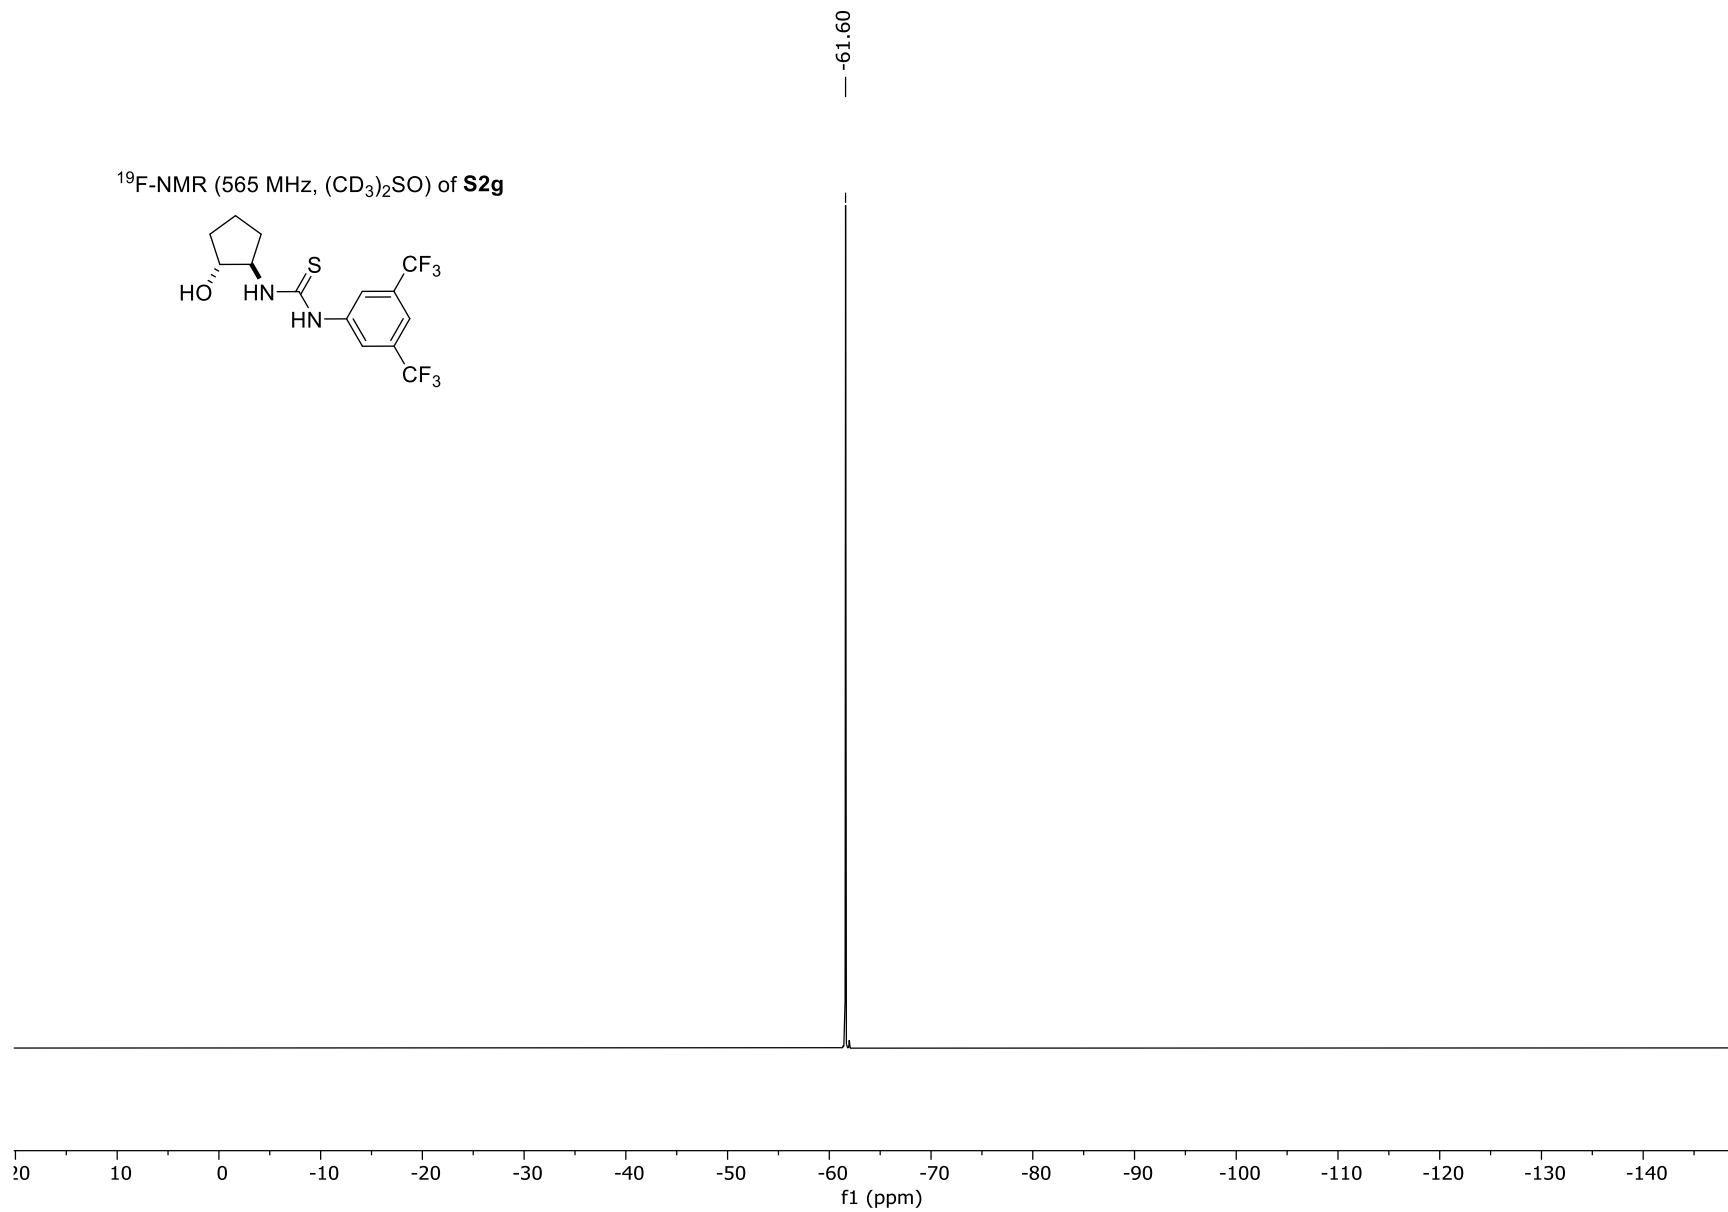

<sup>1</sup>H-NMR (600 MHz, (CD<sub>3</sub>)<sub>2</sub>SO) of **3i**

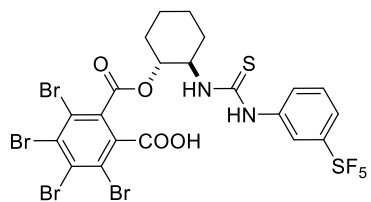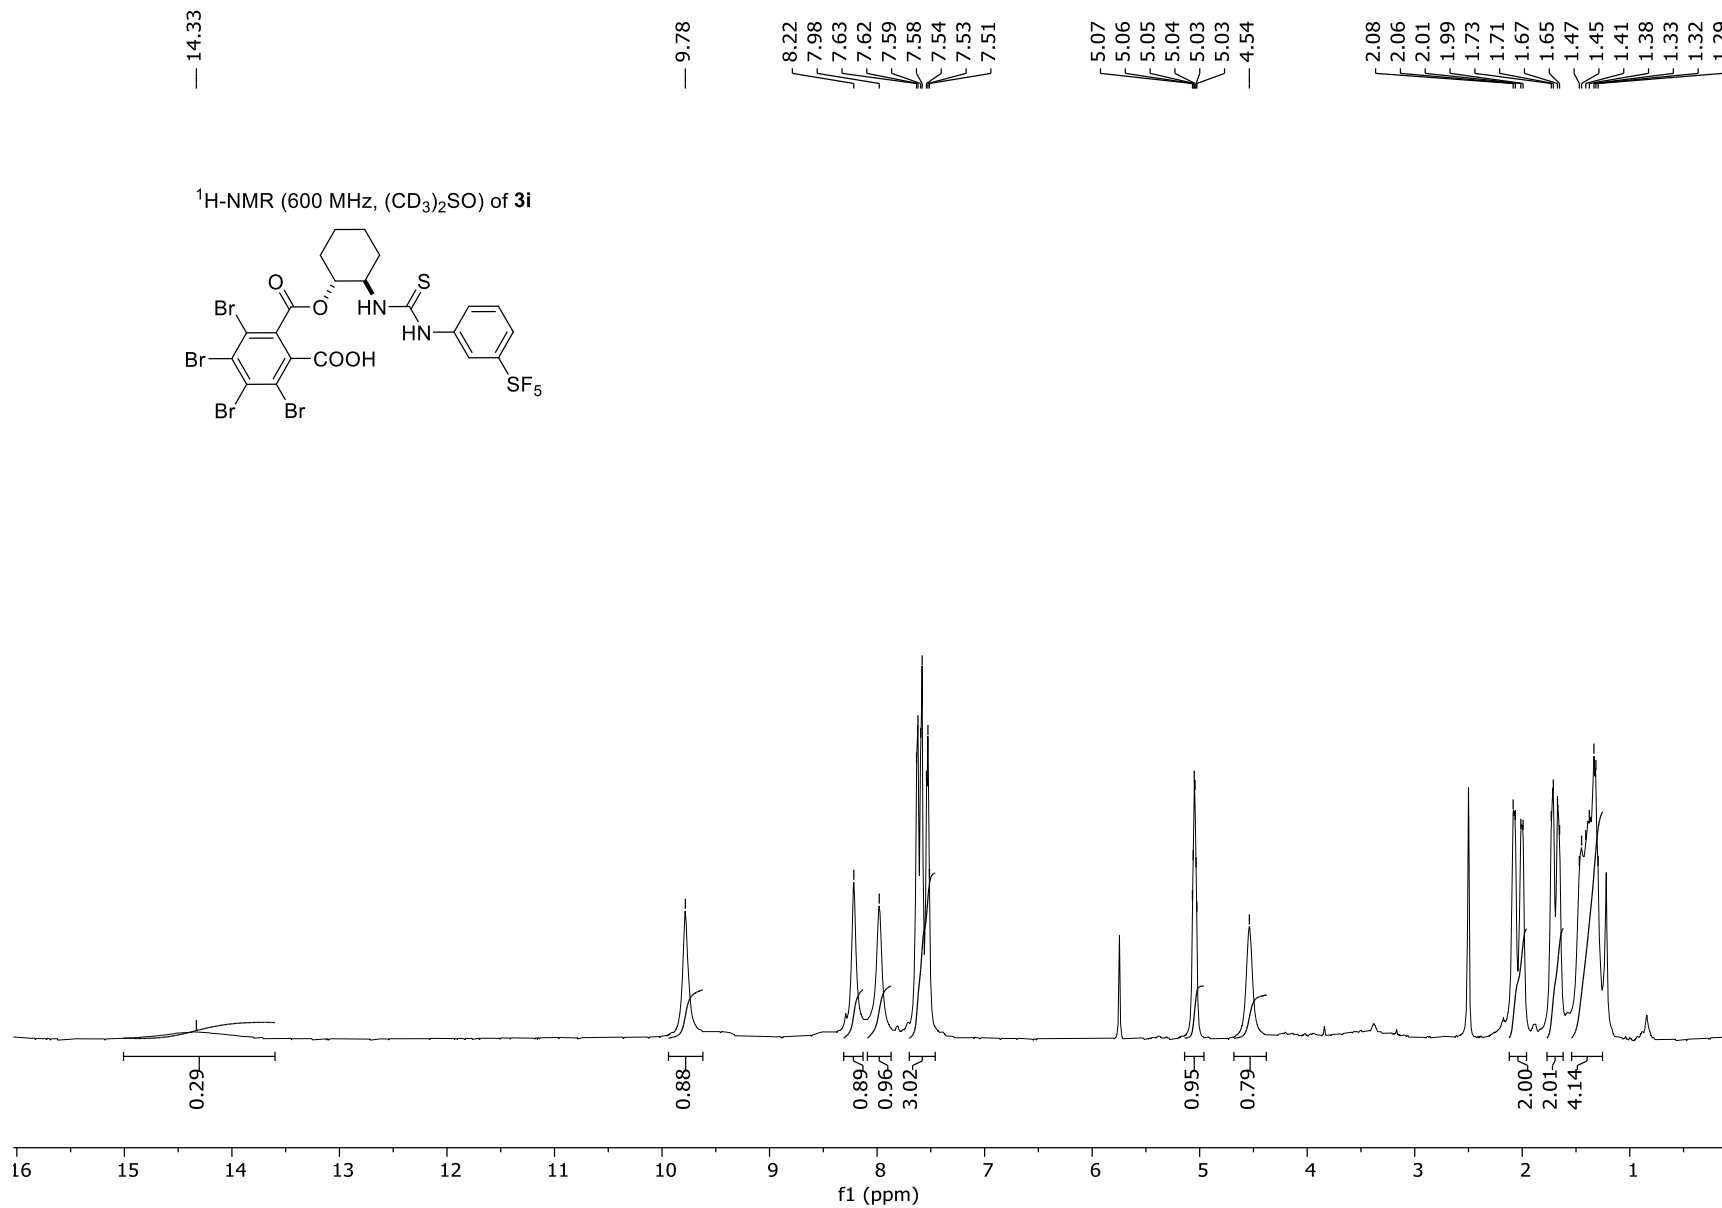

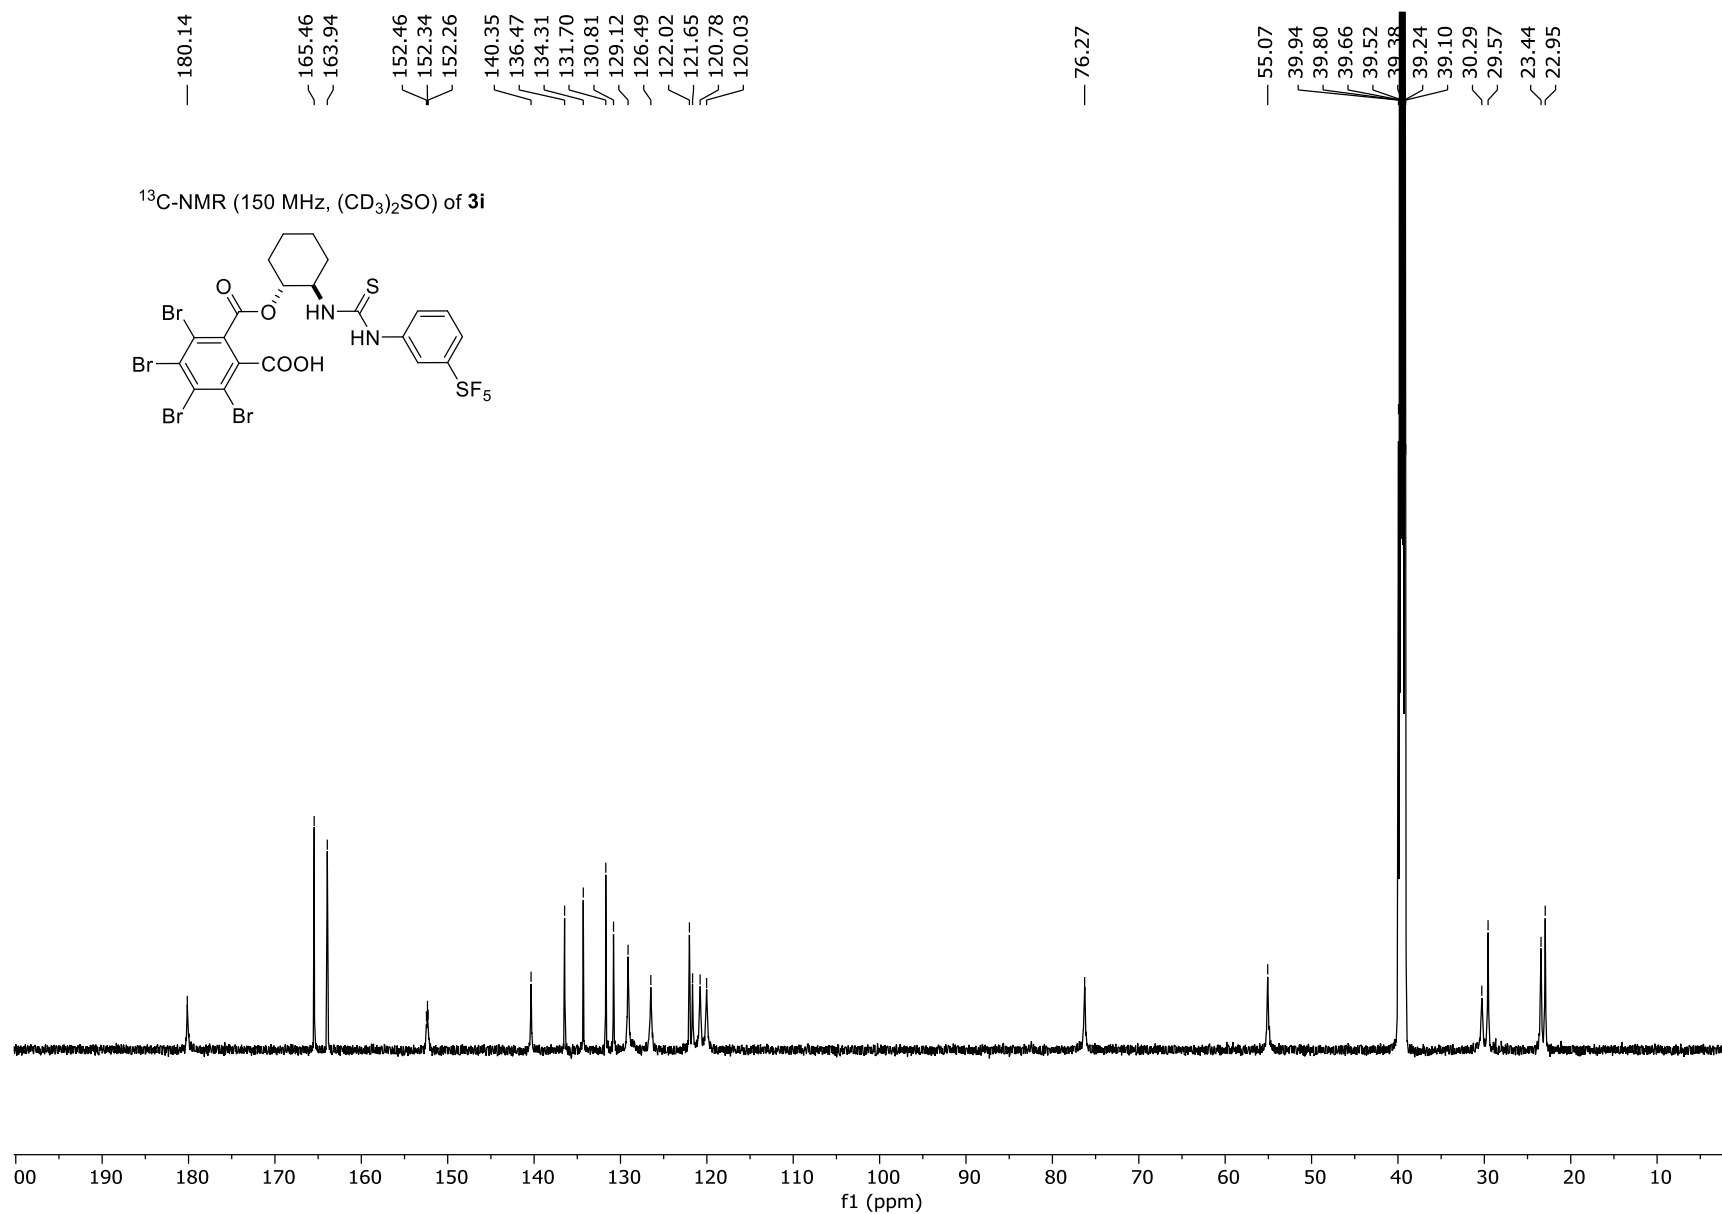

88.29  
87.89  
87.49  
87.08  
86.69

64.01  
63.61

$^{19}\text{F}$ -NMR (377 MHz,  $(\text{CD}_3)_2\text{SO}$ ) of **3i**

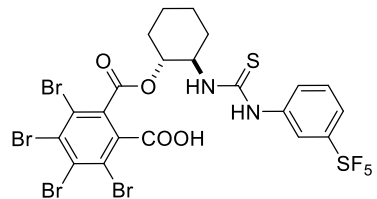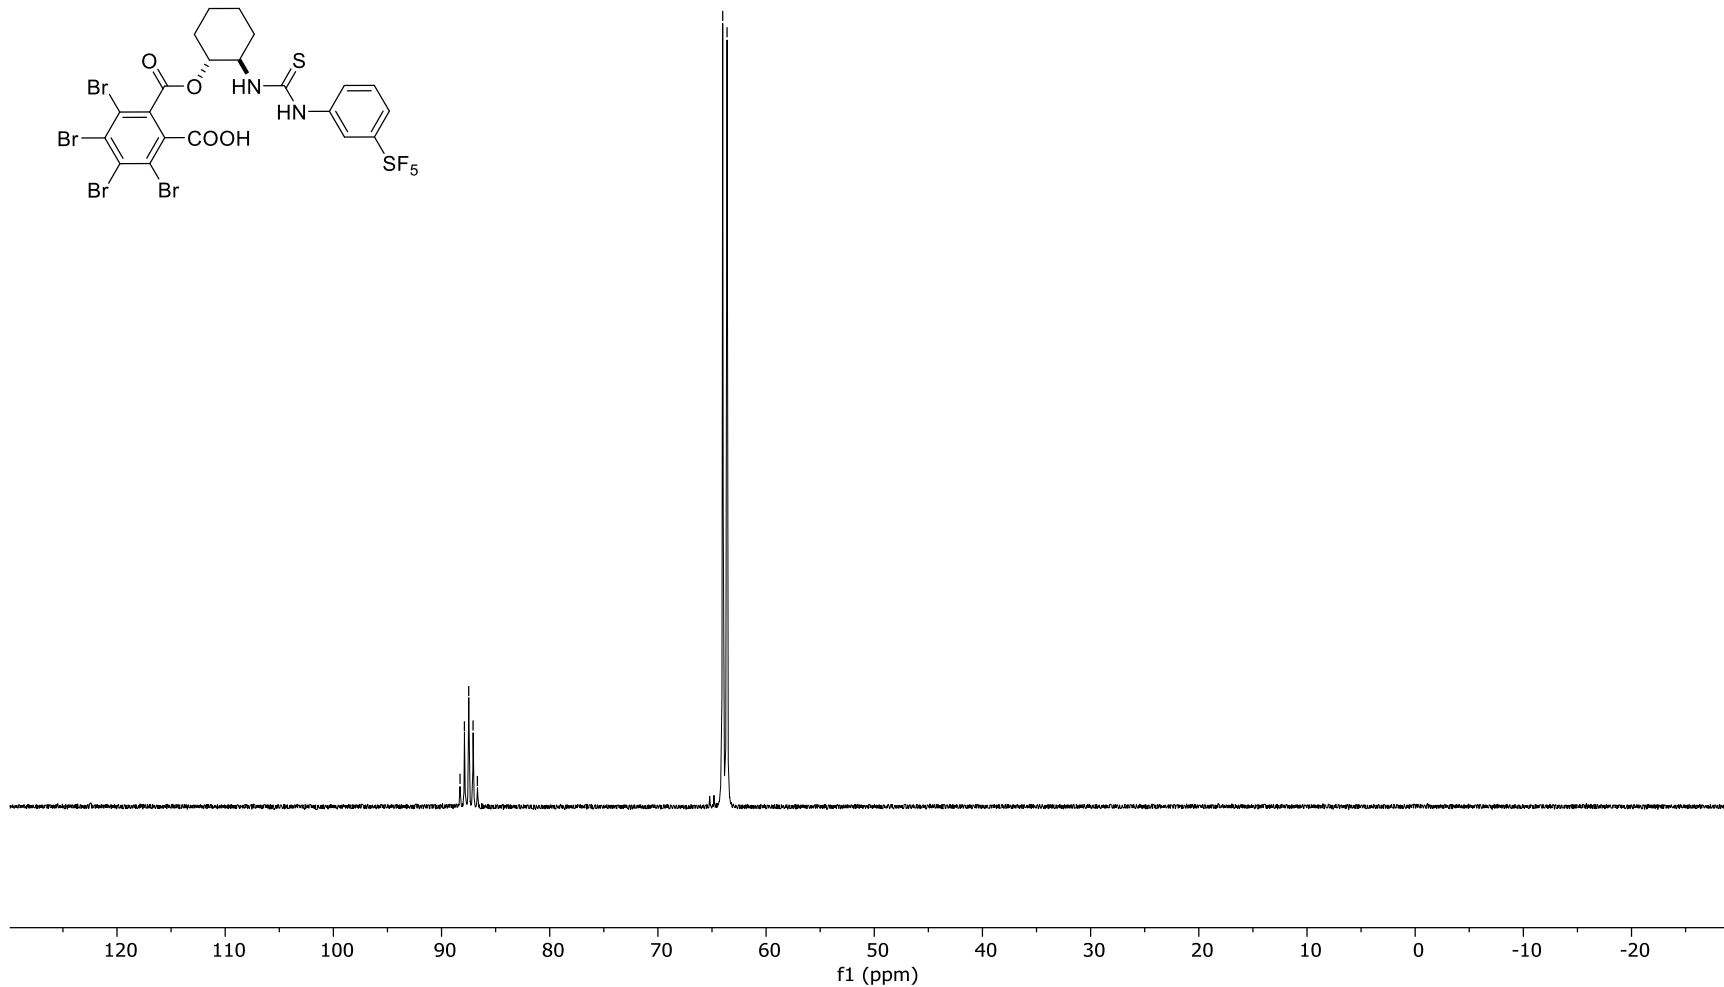

<sup>1</sup>H-NMR (600 MHz, (CD<sub>3</sub>)<sub>2</sub>SO) of **3j**

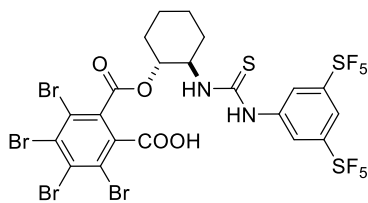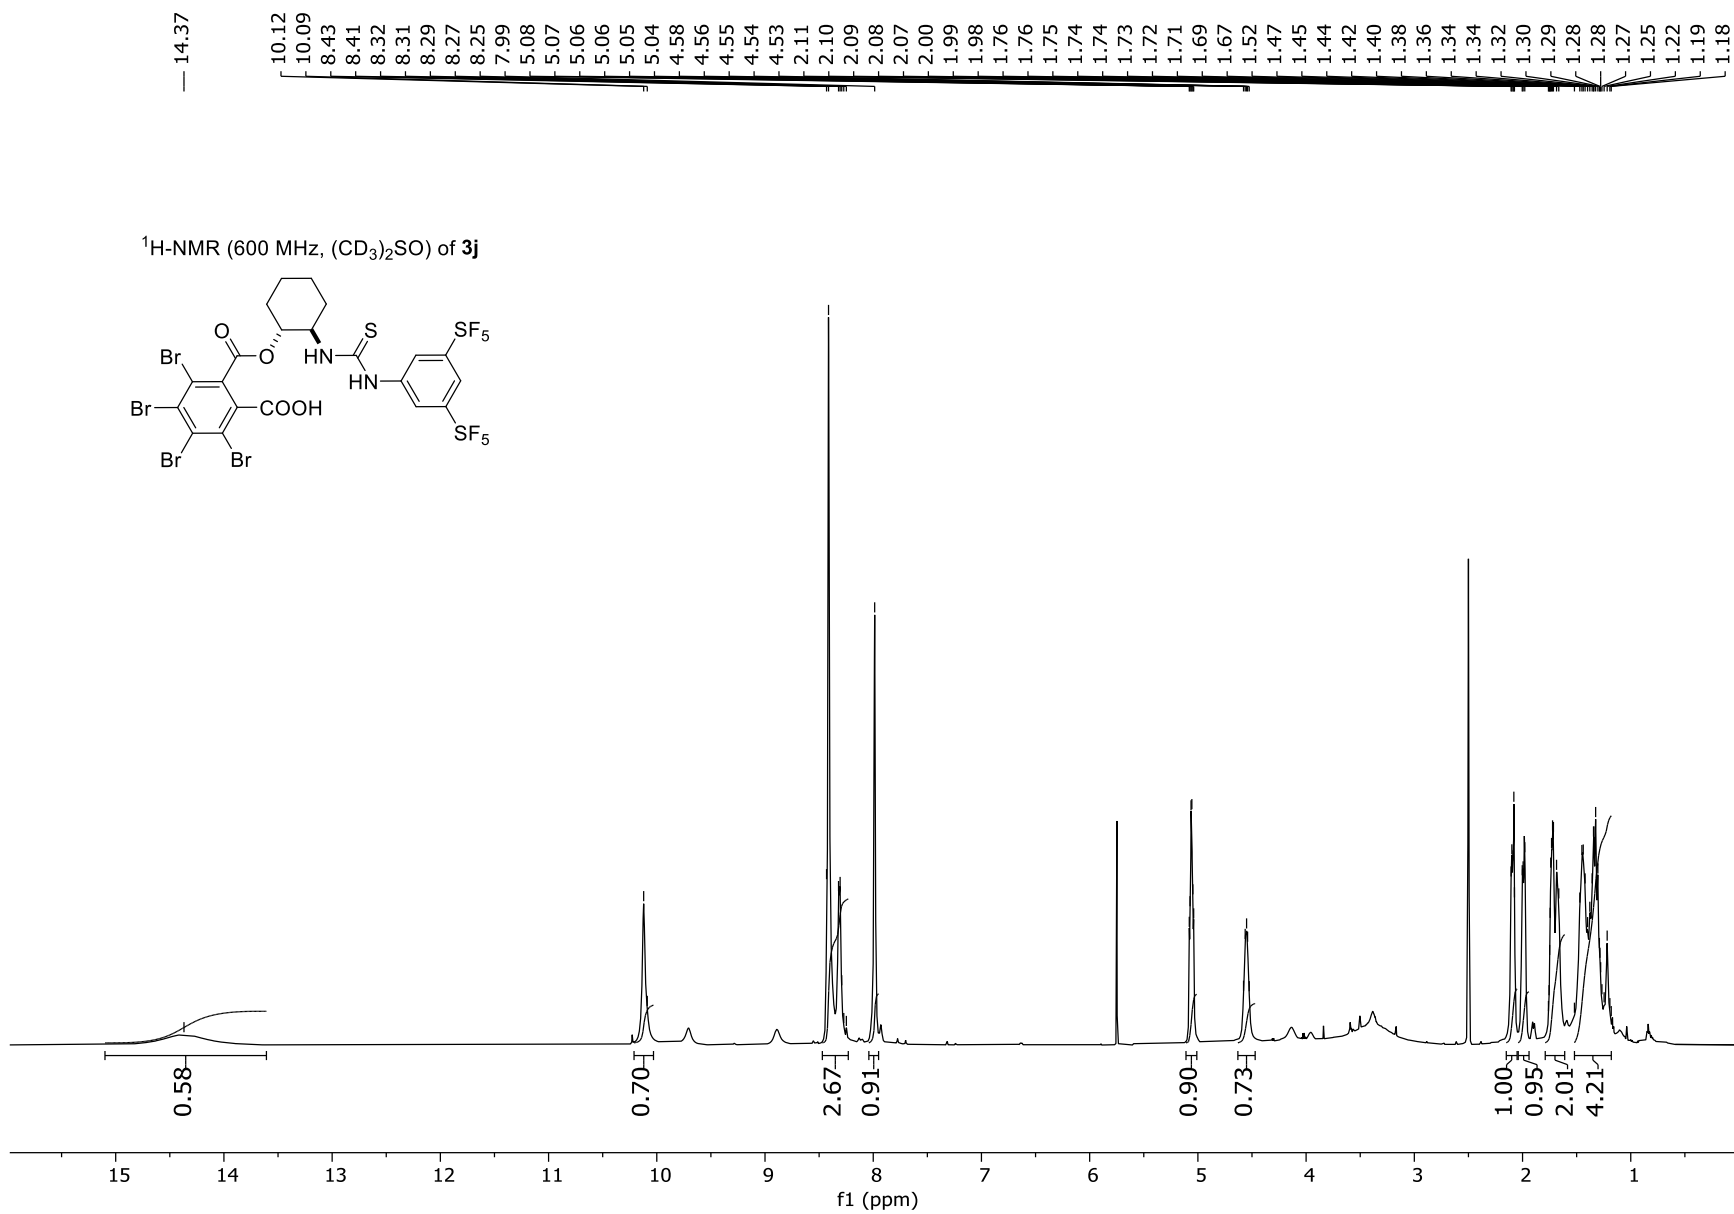



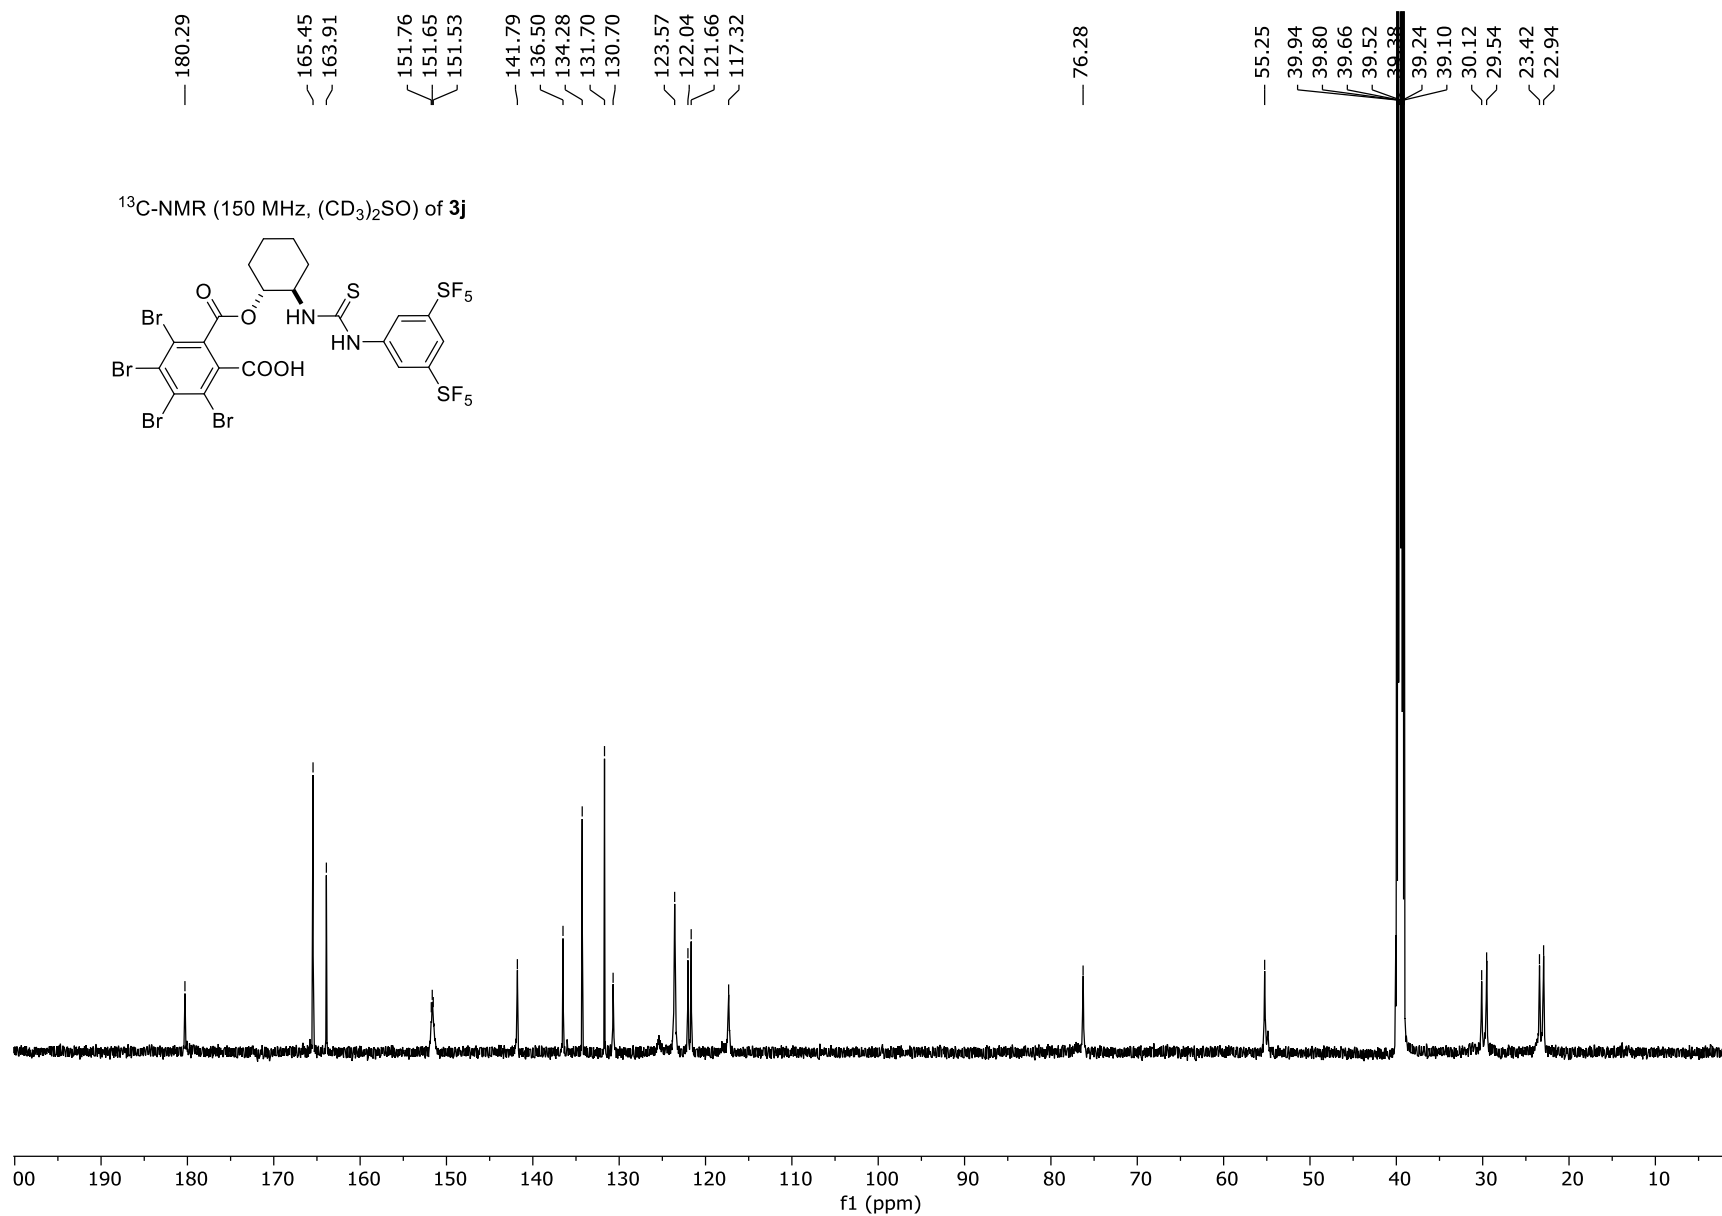

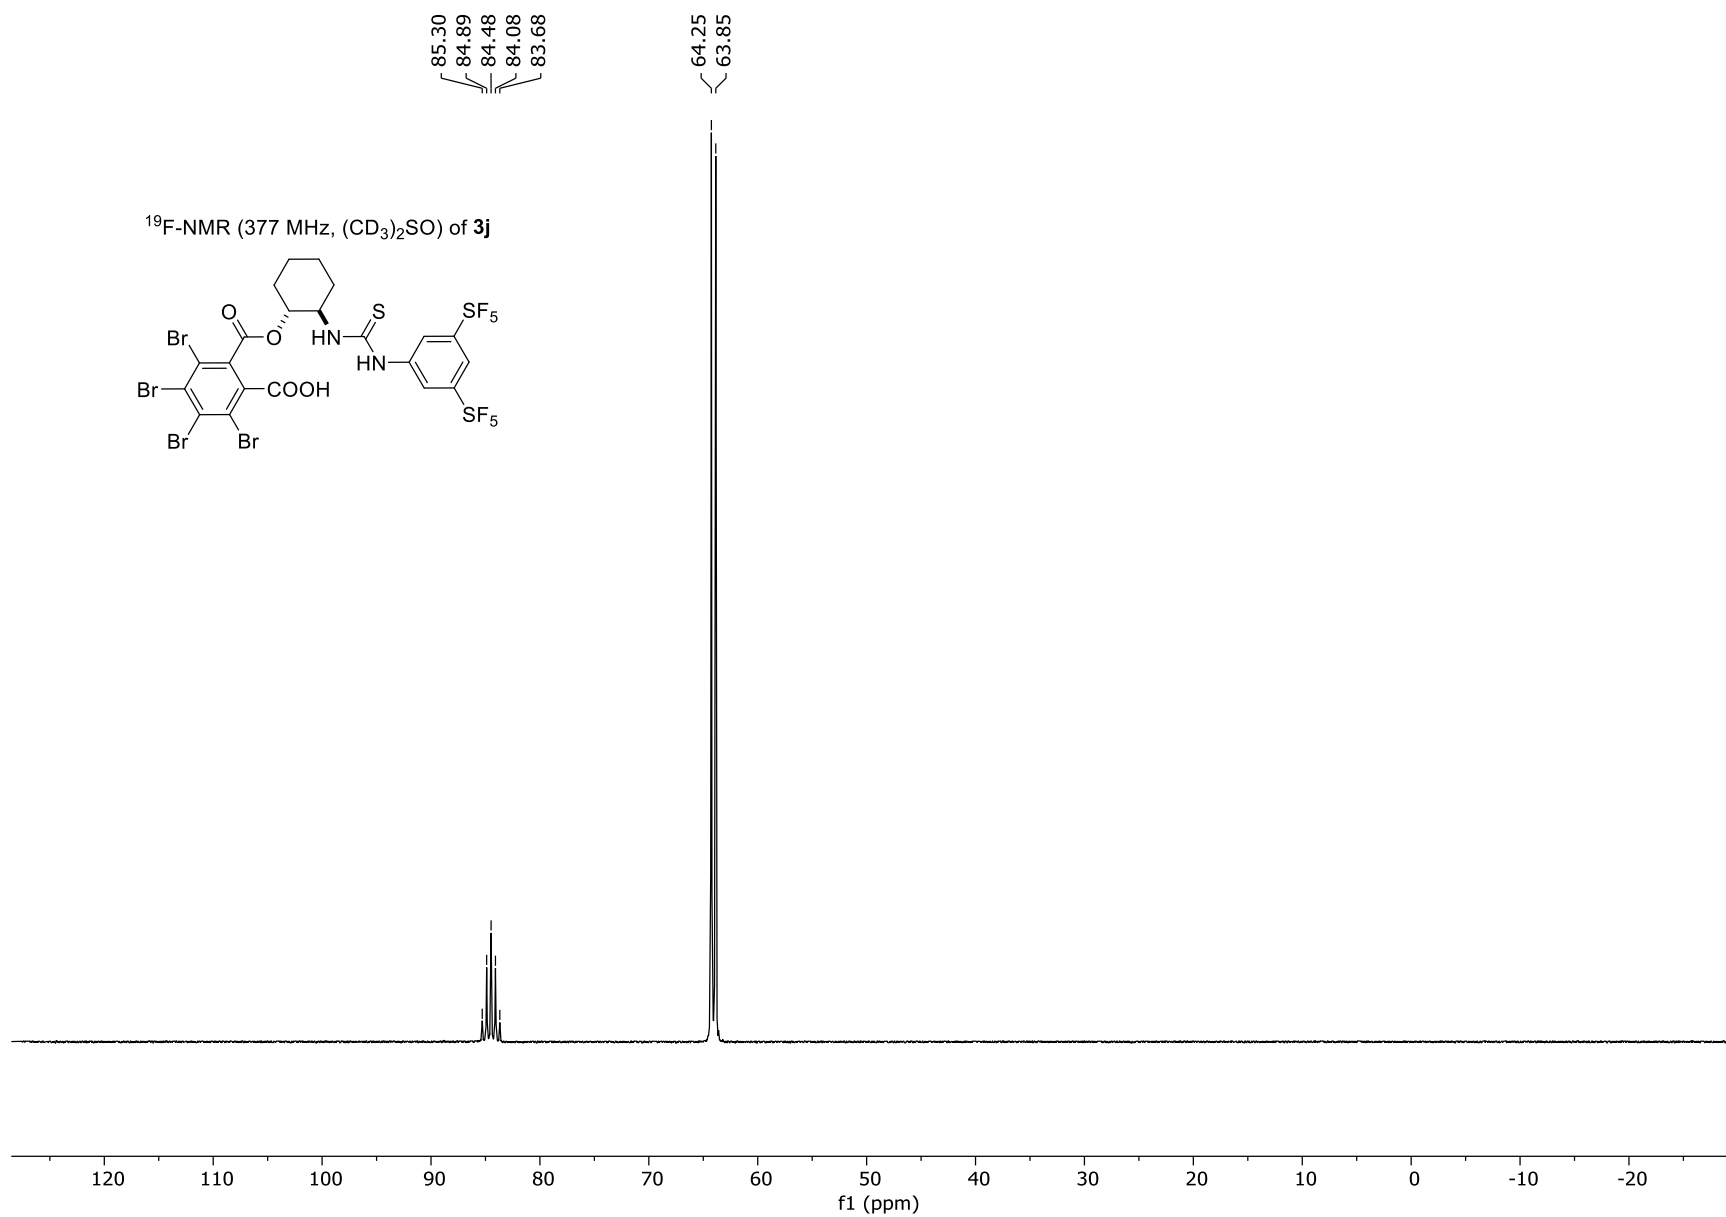

— 14.32

— 9.95

~ 8.05  
~ 7.81  
~ 7.71

~ 5.12  
~ 5.04

— 4.52

2.08  
2.03  
1.72  
1.66  
1.47  
1.38  
1.33  
1.31  
1.23

<sup>1</sup>H-NMR (600 MHz, (CD<sub>3</sub>)<sub>2</sub>SO) of **3k**

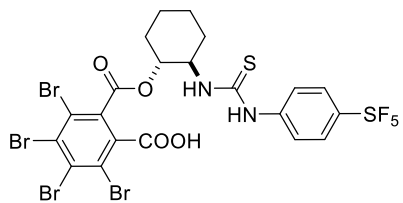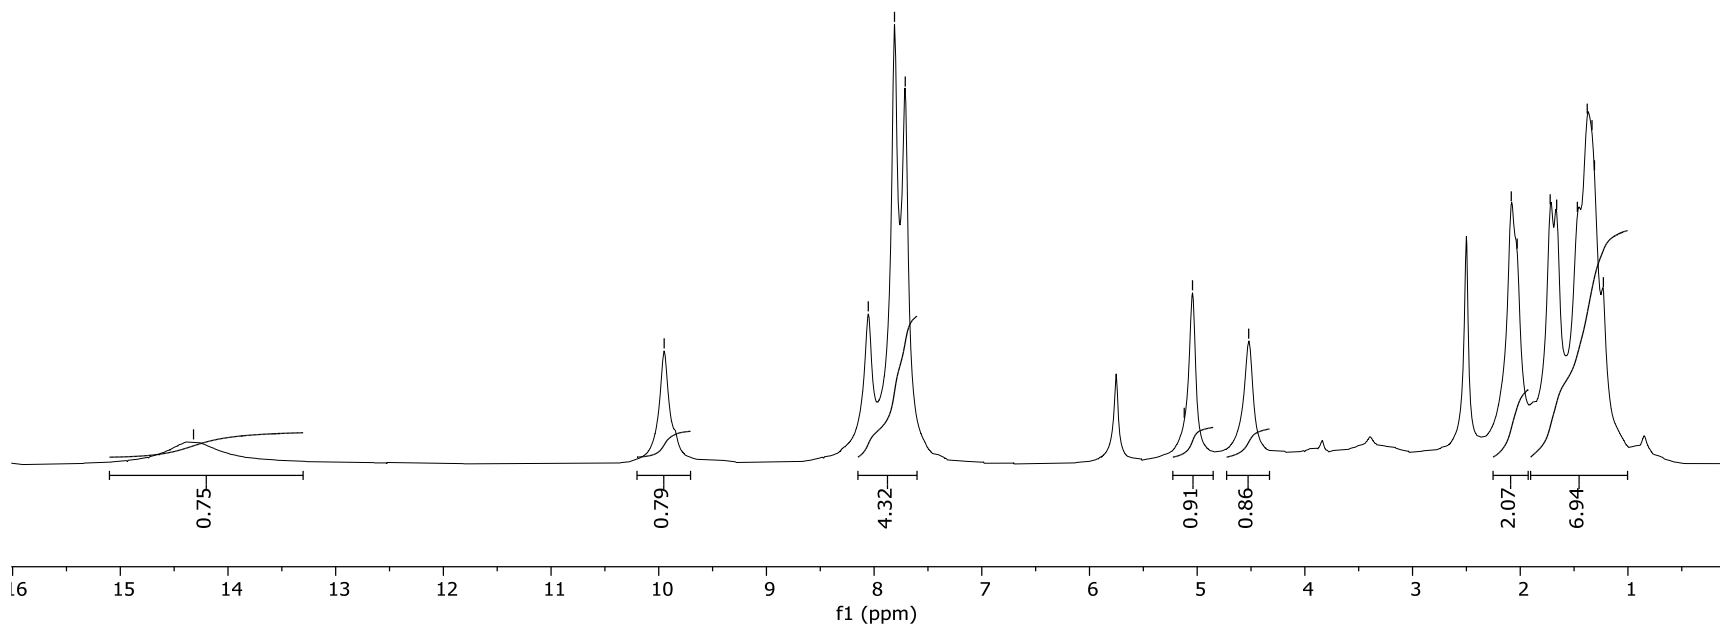

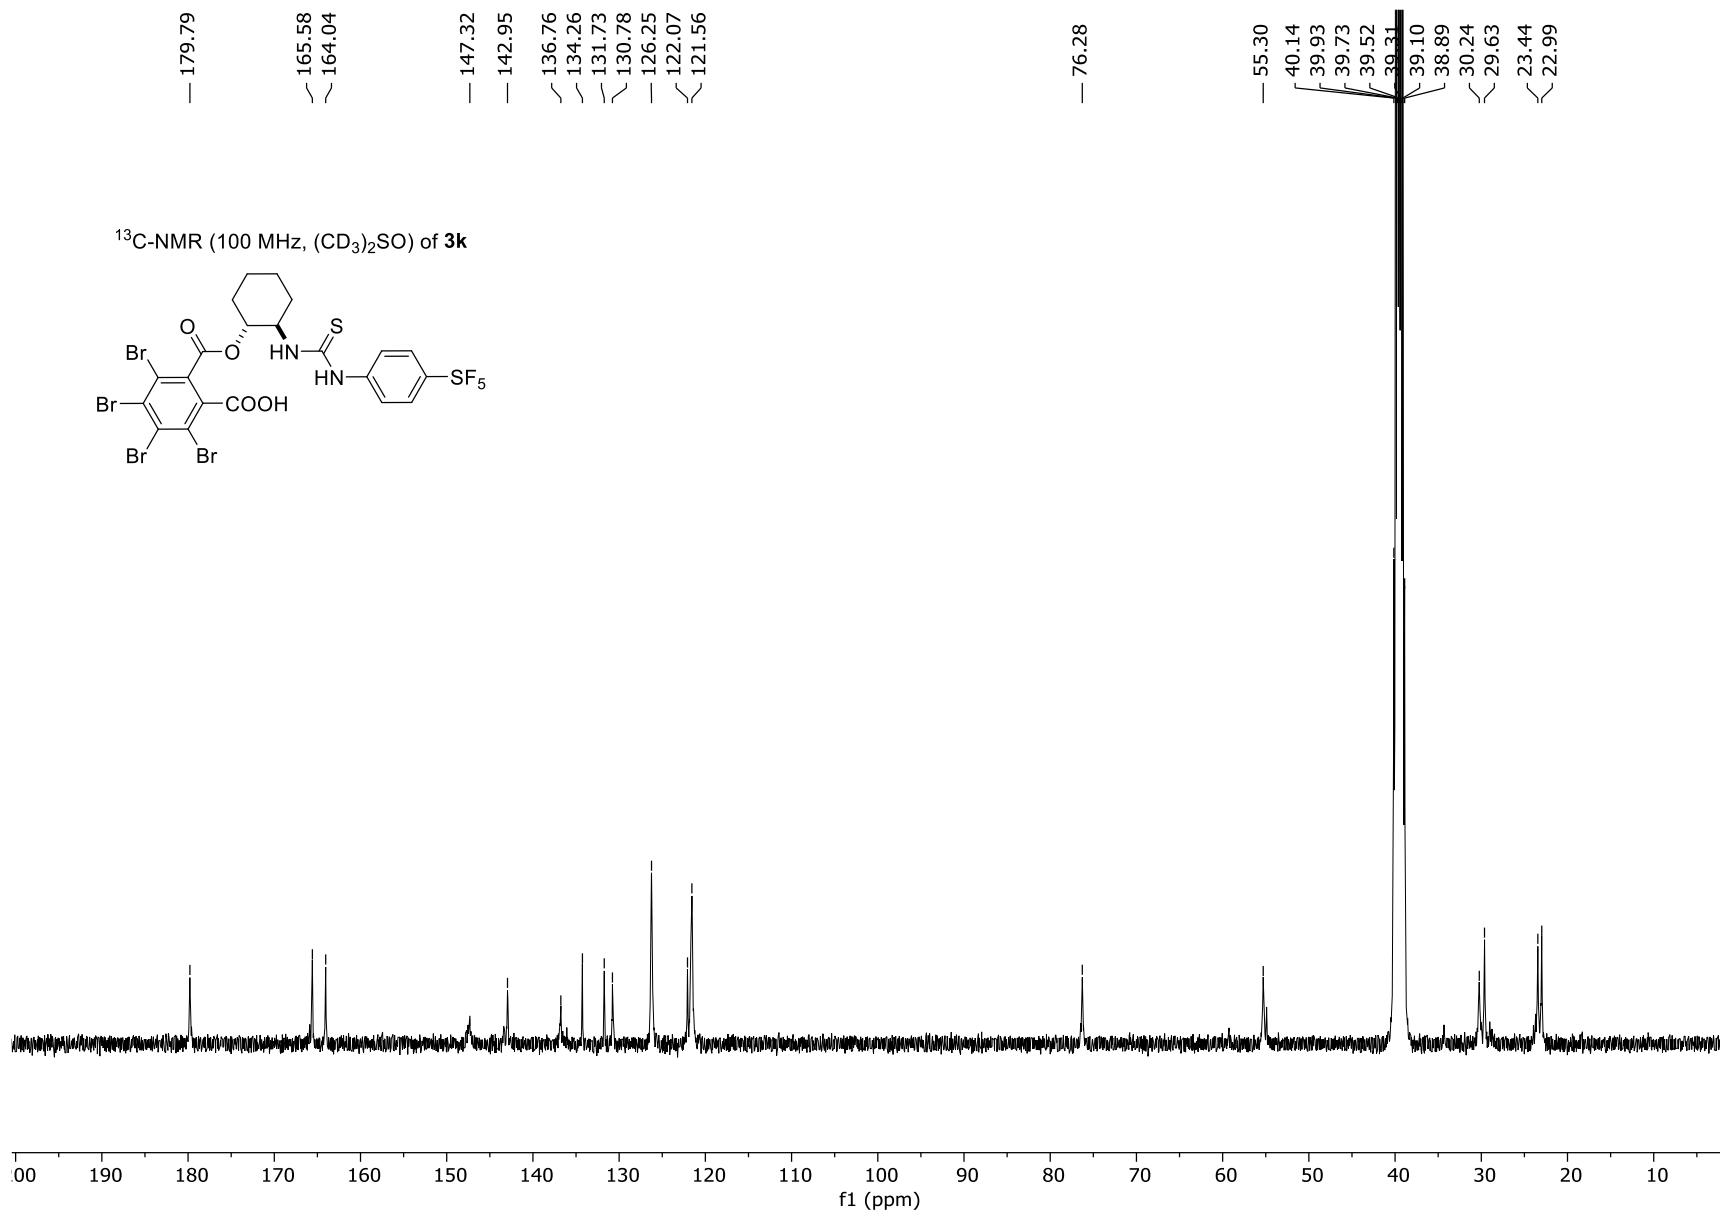

<sup>19</sup>F-NMR (565 MHz, (CD<sub>3</sub>)<sub>2</sub>SO) of **3k**

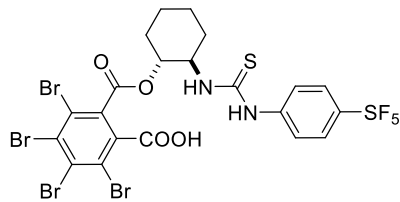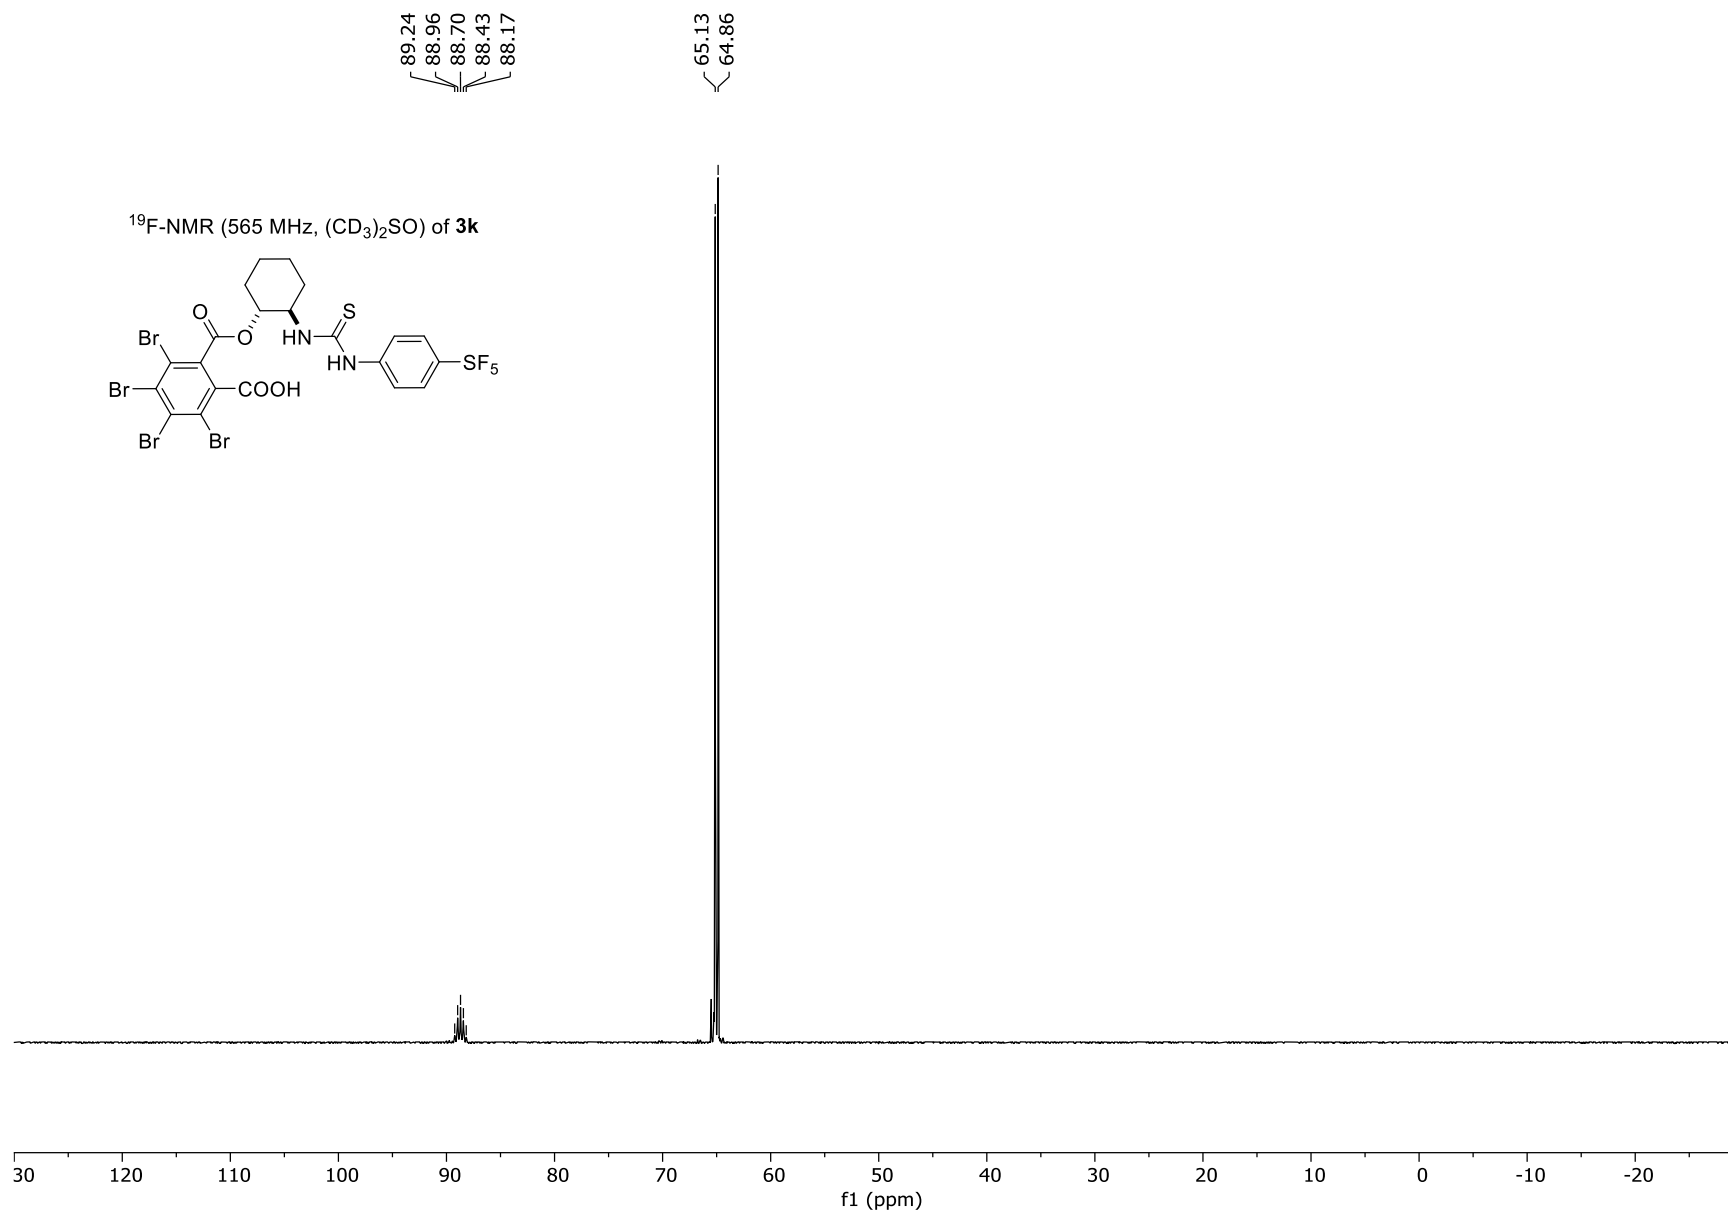

<sup>1</sup>H-NMR (600 MHz, (CD<sub>3</sub>)<sub>2</sub>SO) of **31**

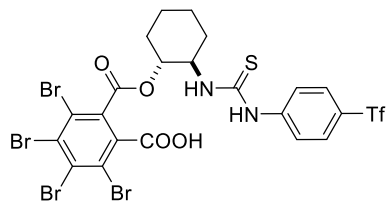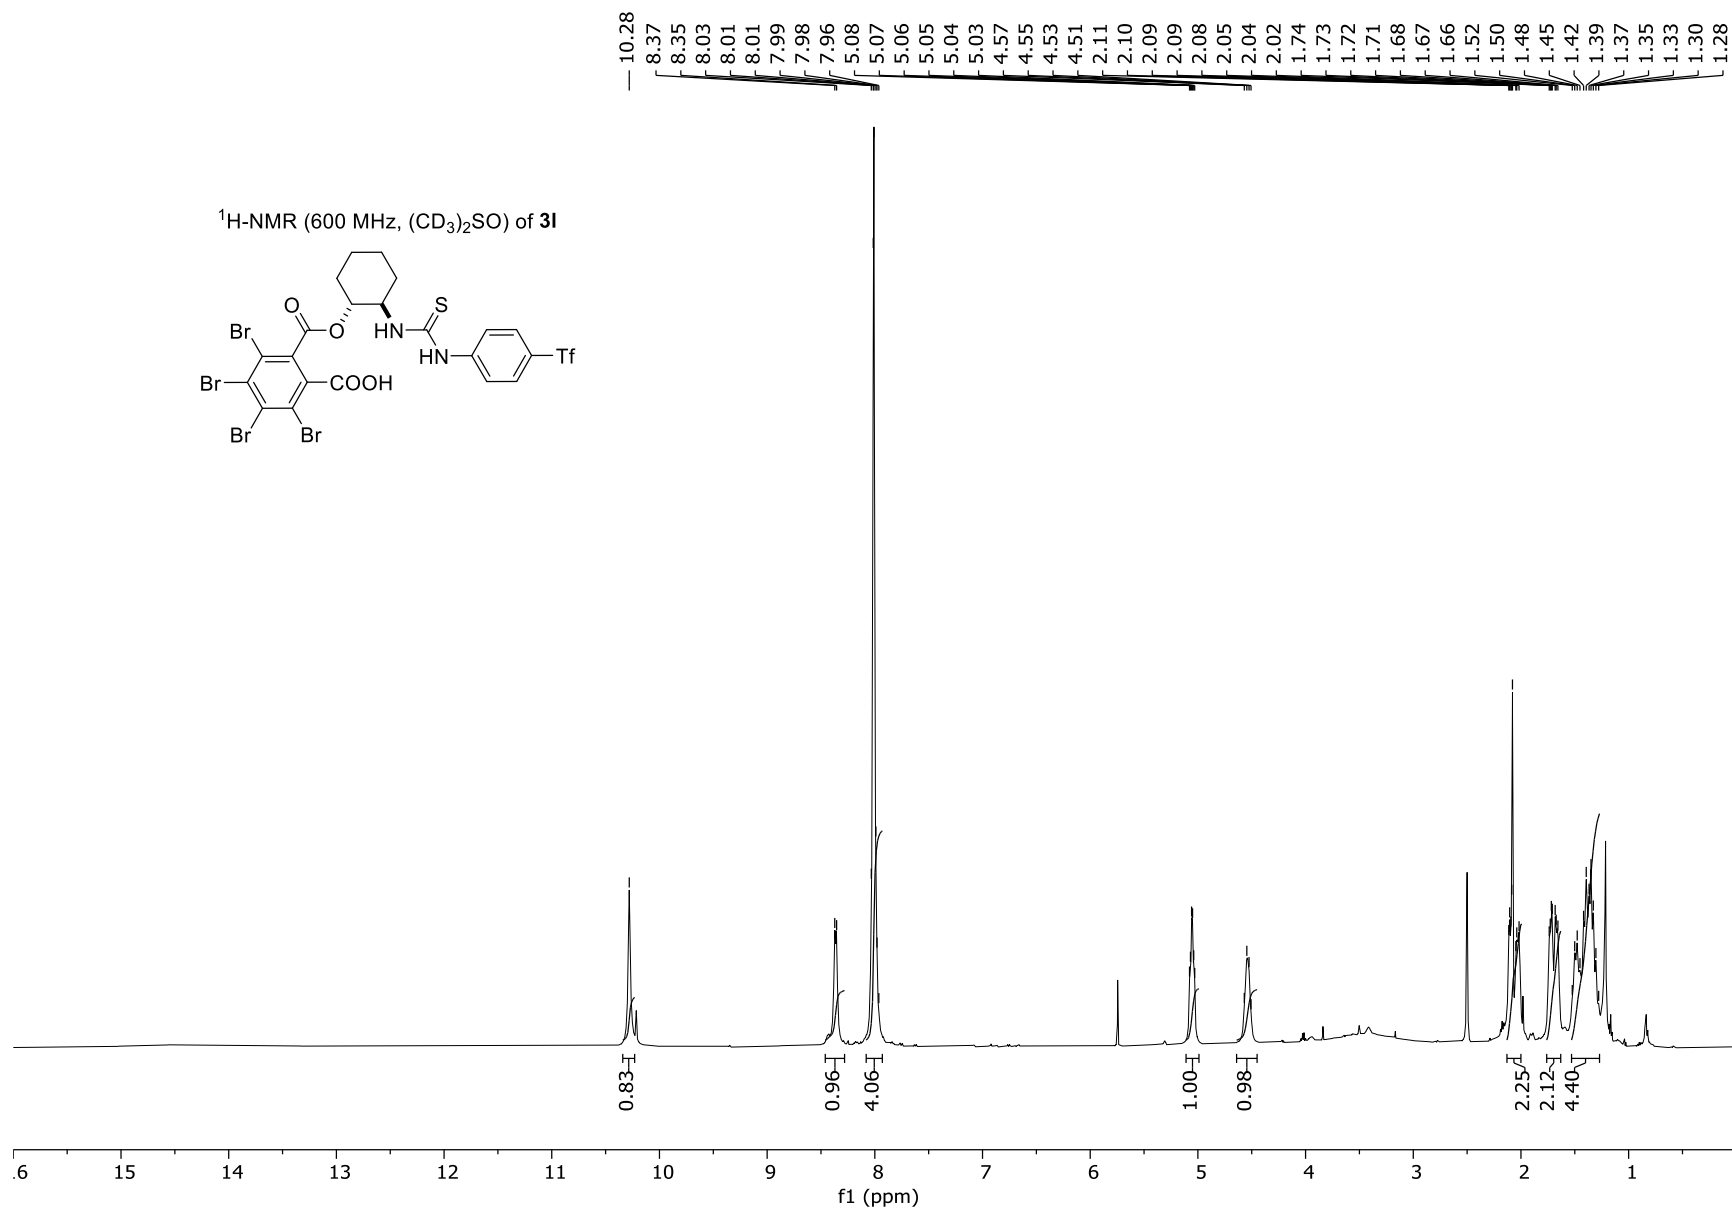

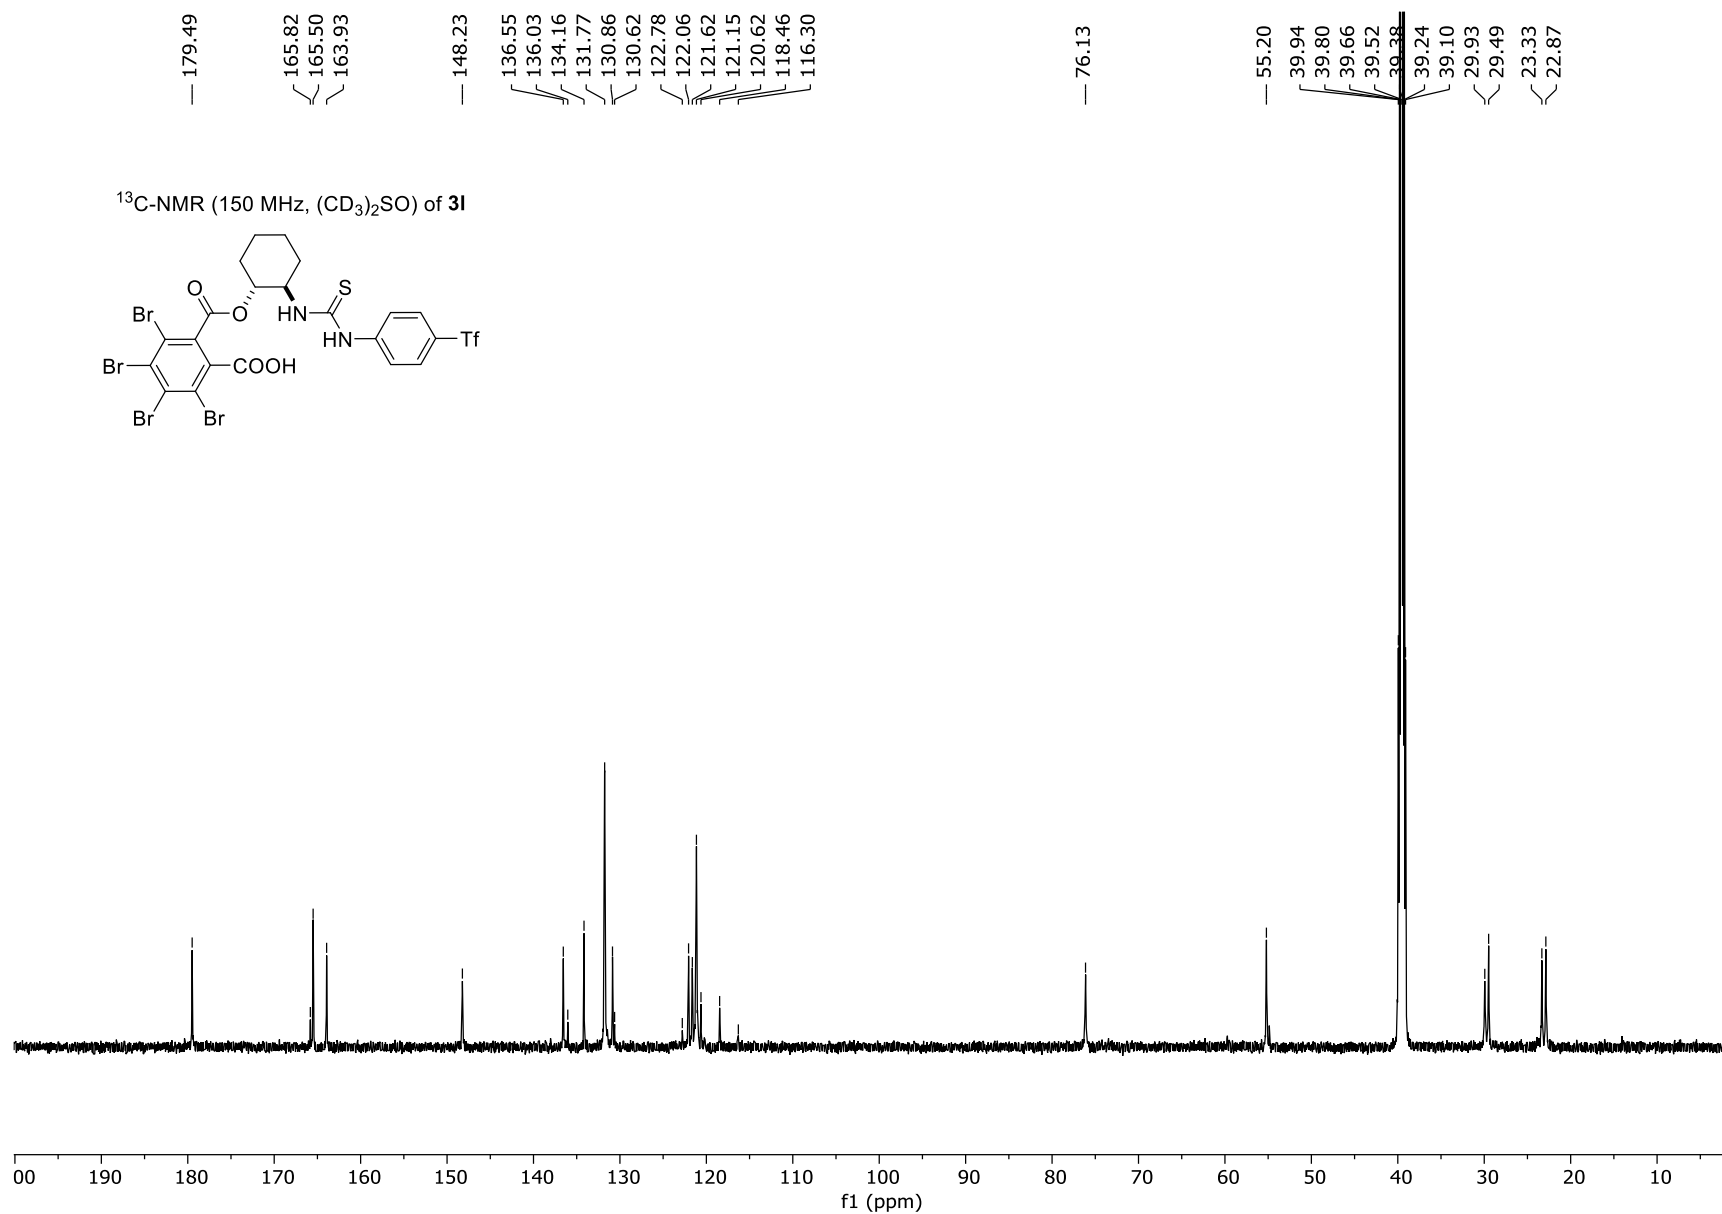

<sup>19</sup>F-NMR (377 MHz, (CD<sub>3</sub>)<sub>2</sub>SO) of **31**

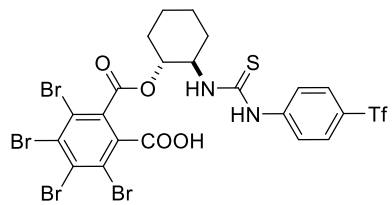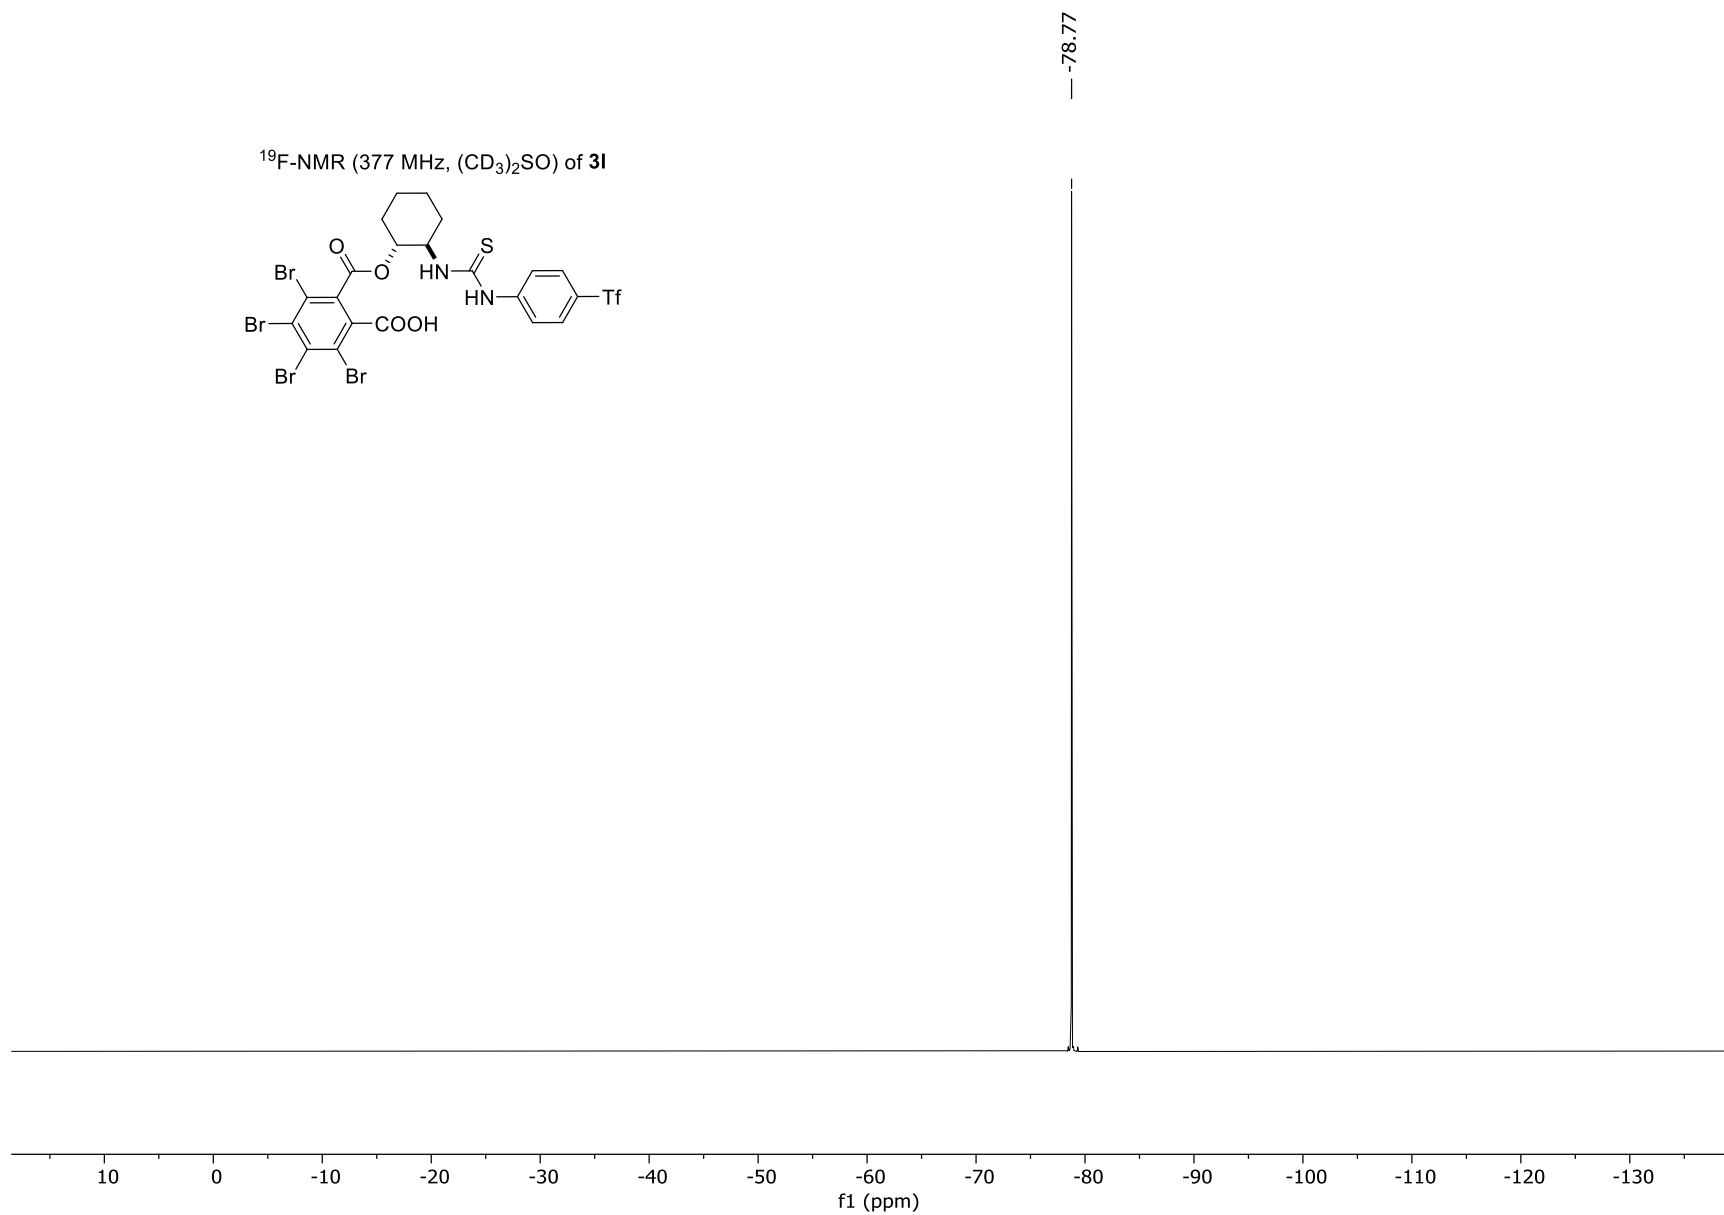



— 14.45

<sup>1</sup>H-NMR (600 MHz, (CD<sub>3</sub>)<sub>2</sub>SO) of **3m**

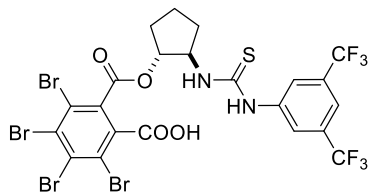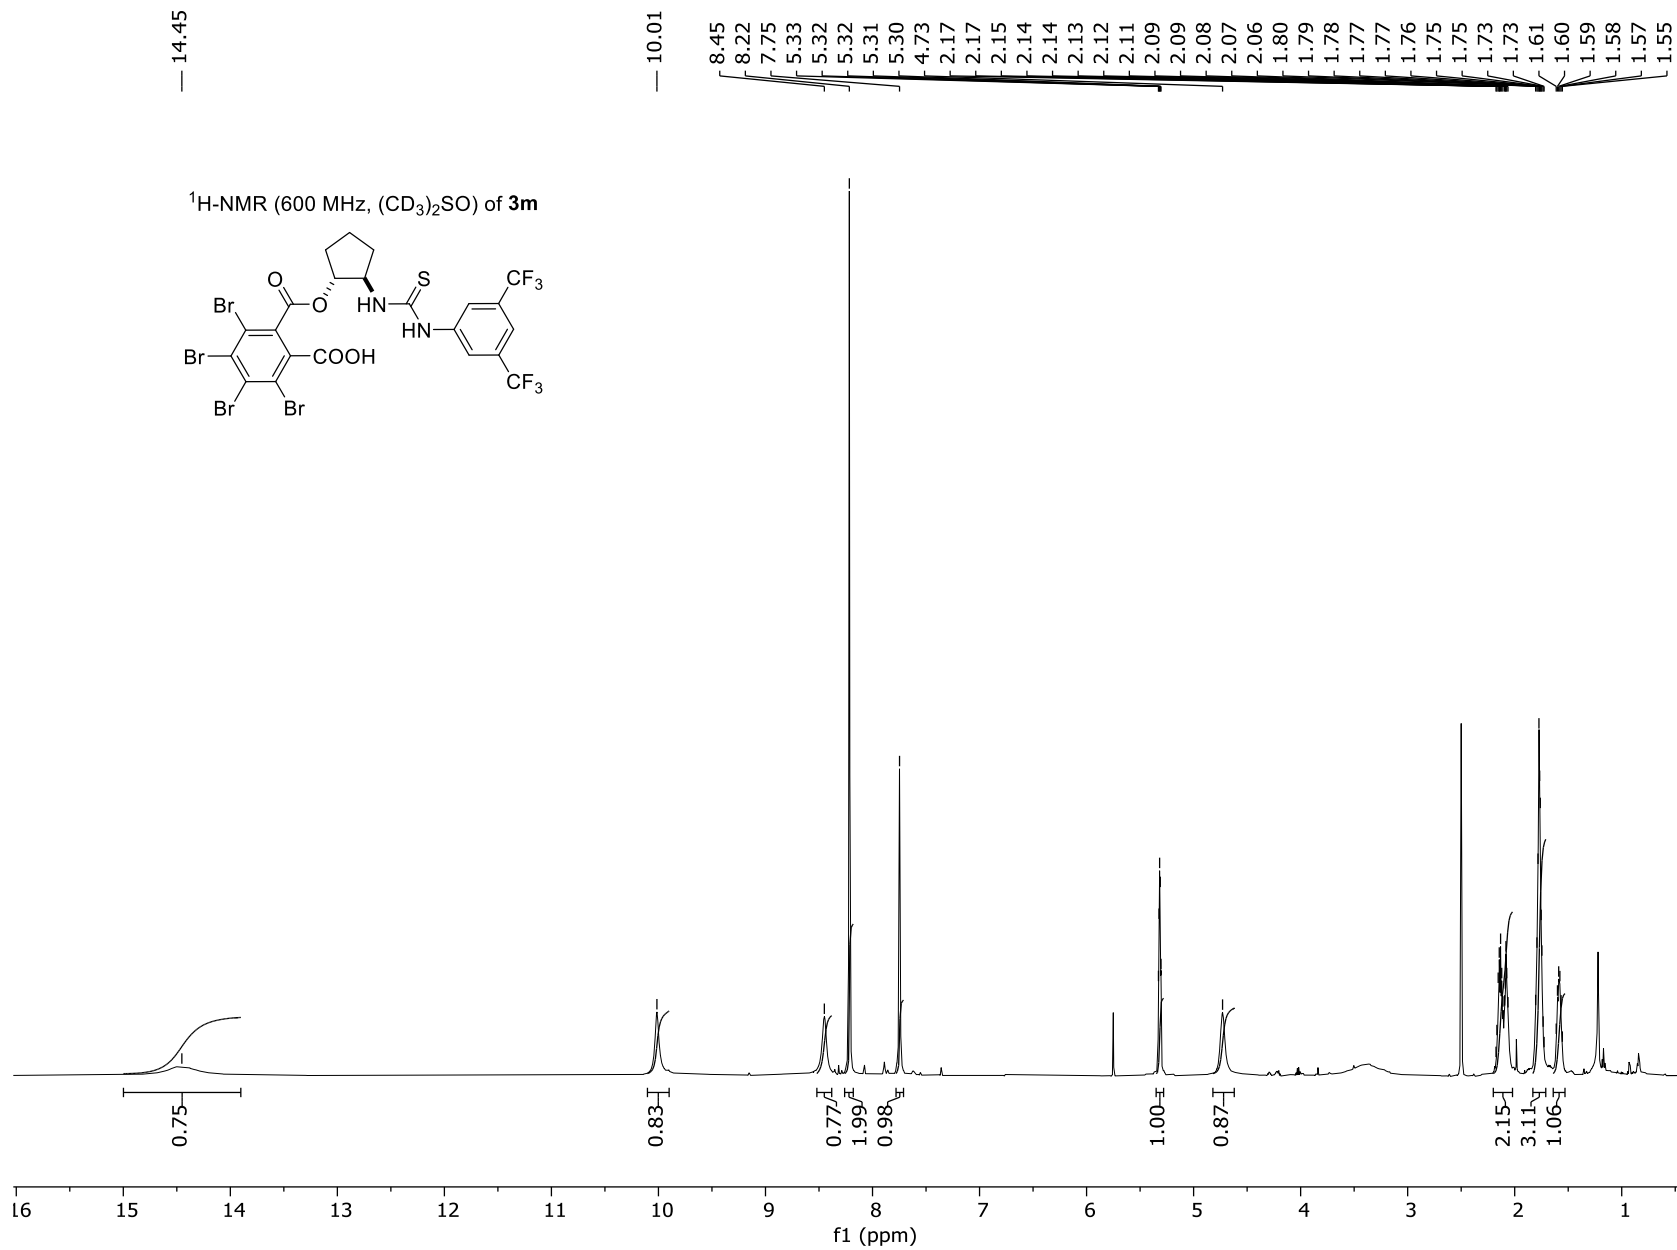

S-109

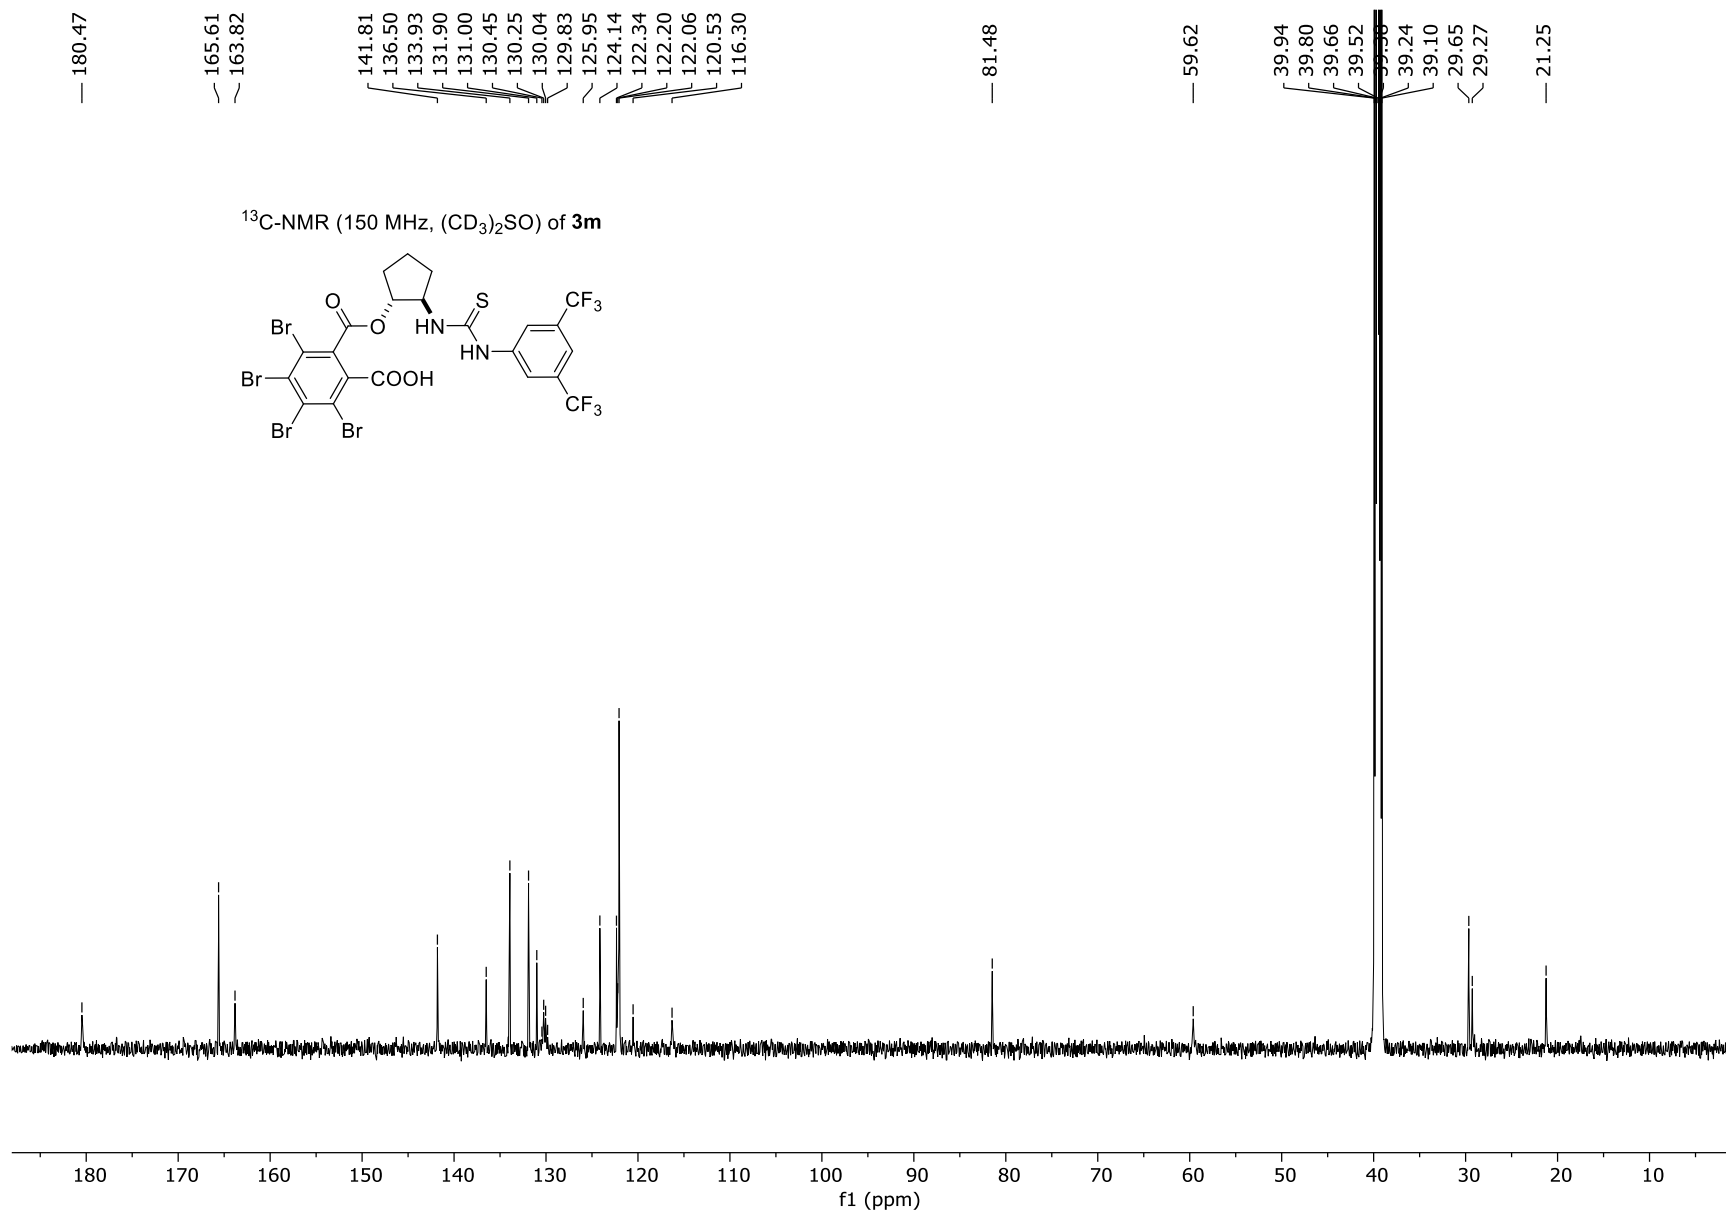

$^{19}\text{F}$ -NMR (377 MHz,  $(\text{CD}_3)_2\text{SO}$ ) of **3m**

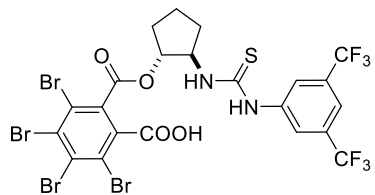

— -61.54

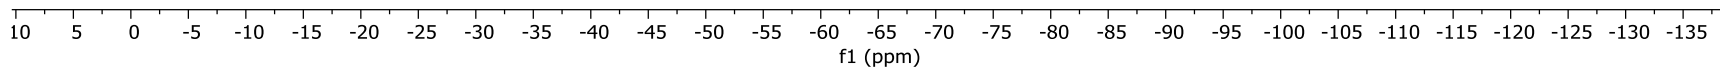

S-111

<sup>1</sup>H-NMR (600 MHz, (CD<sub>3</sub>)<sub>2</sub>SO) of **3n**

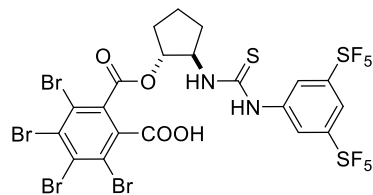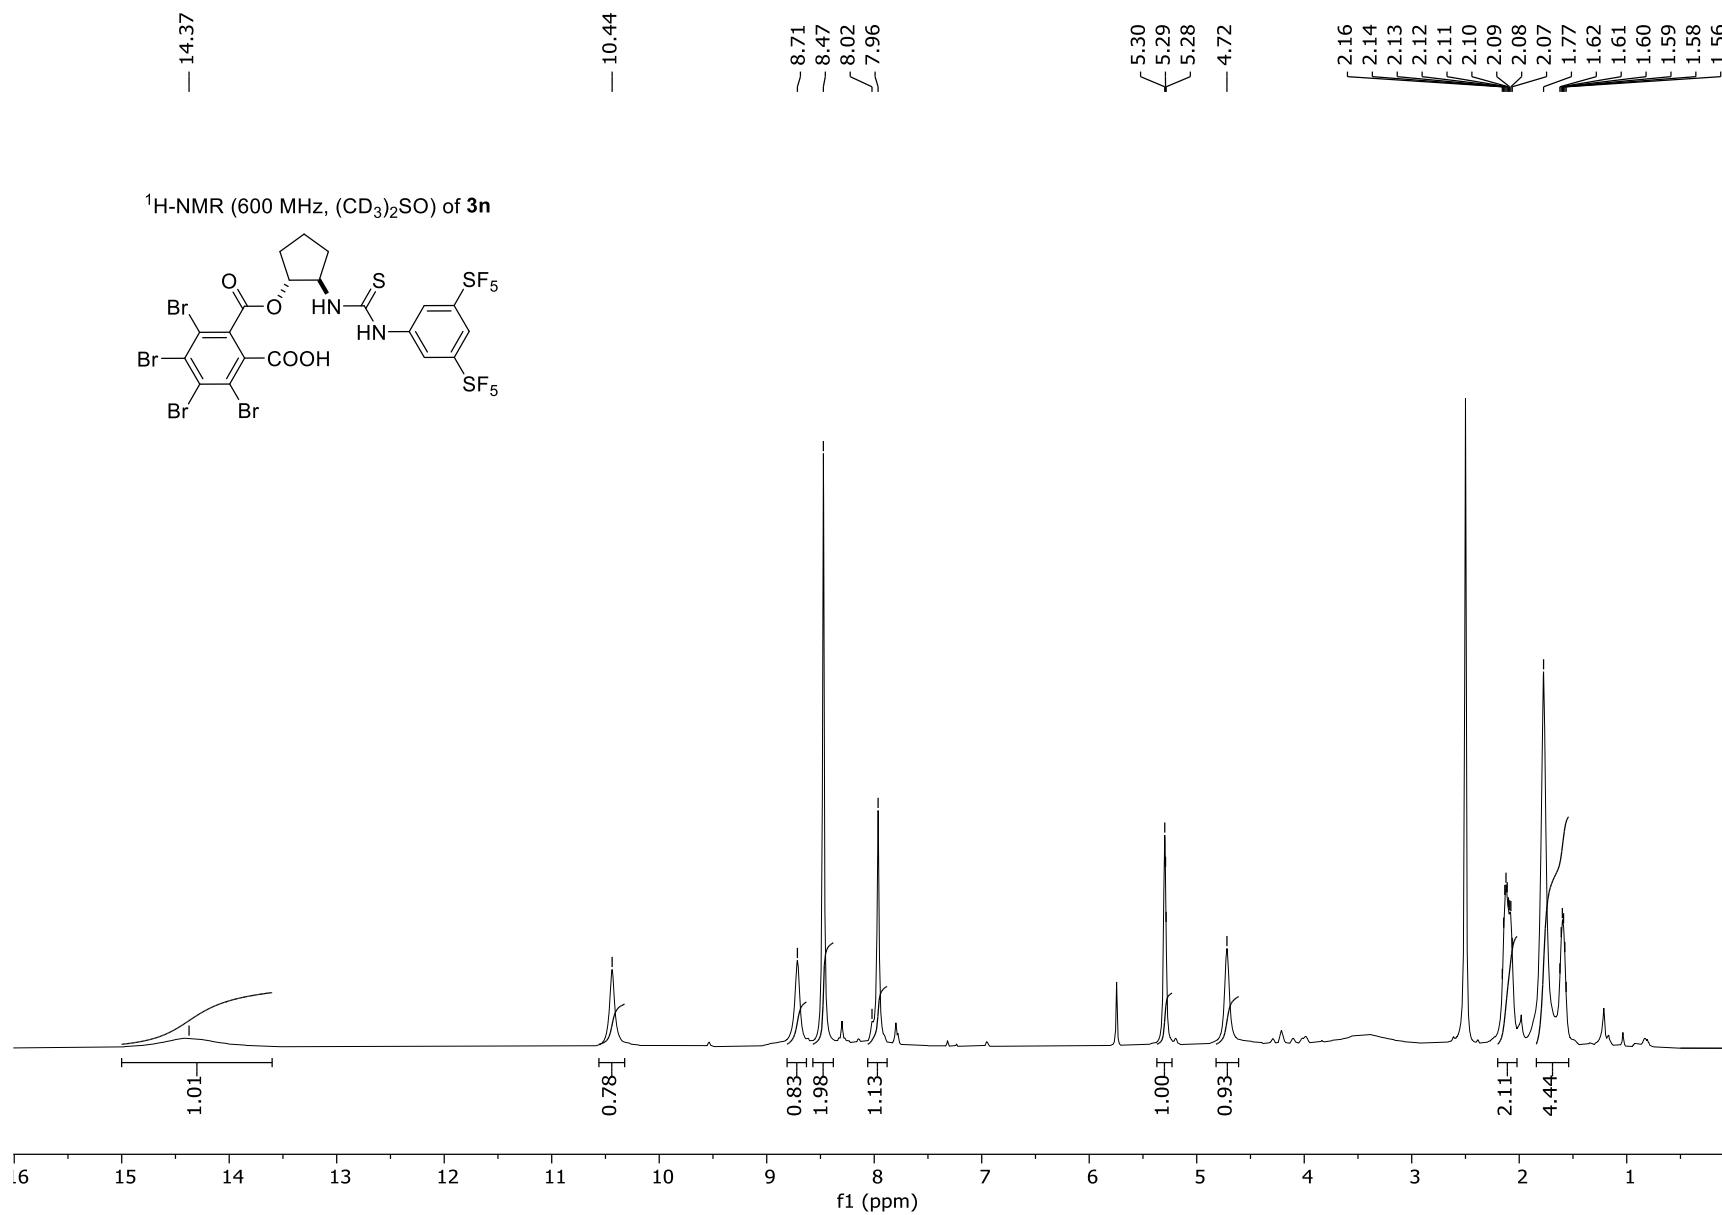

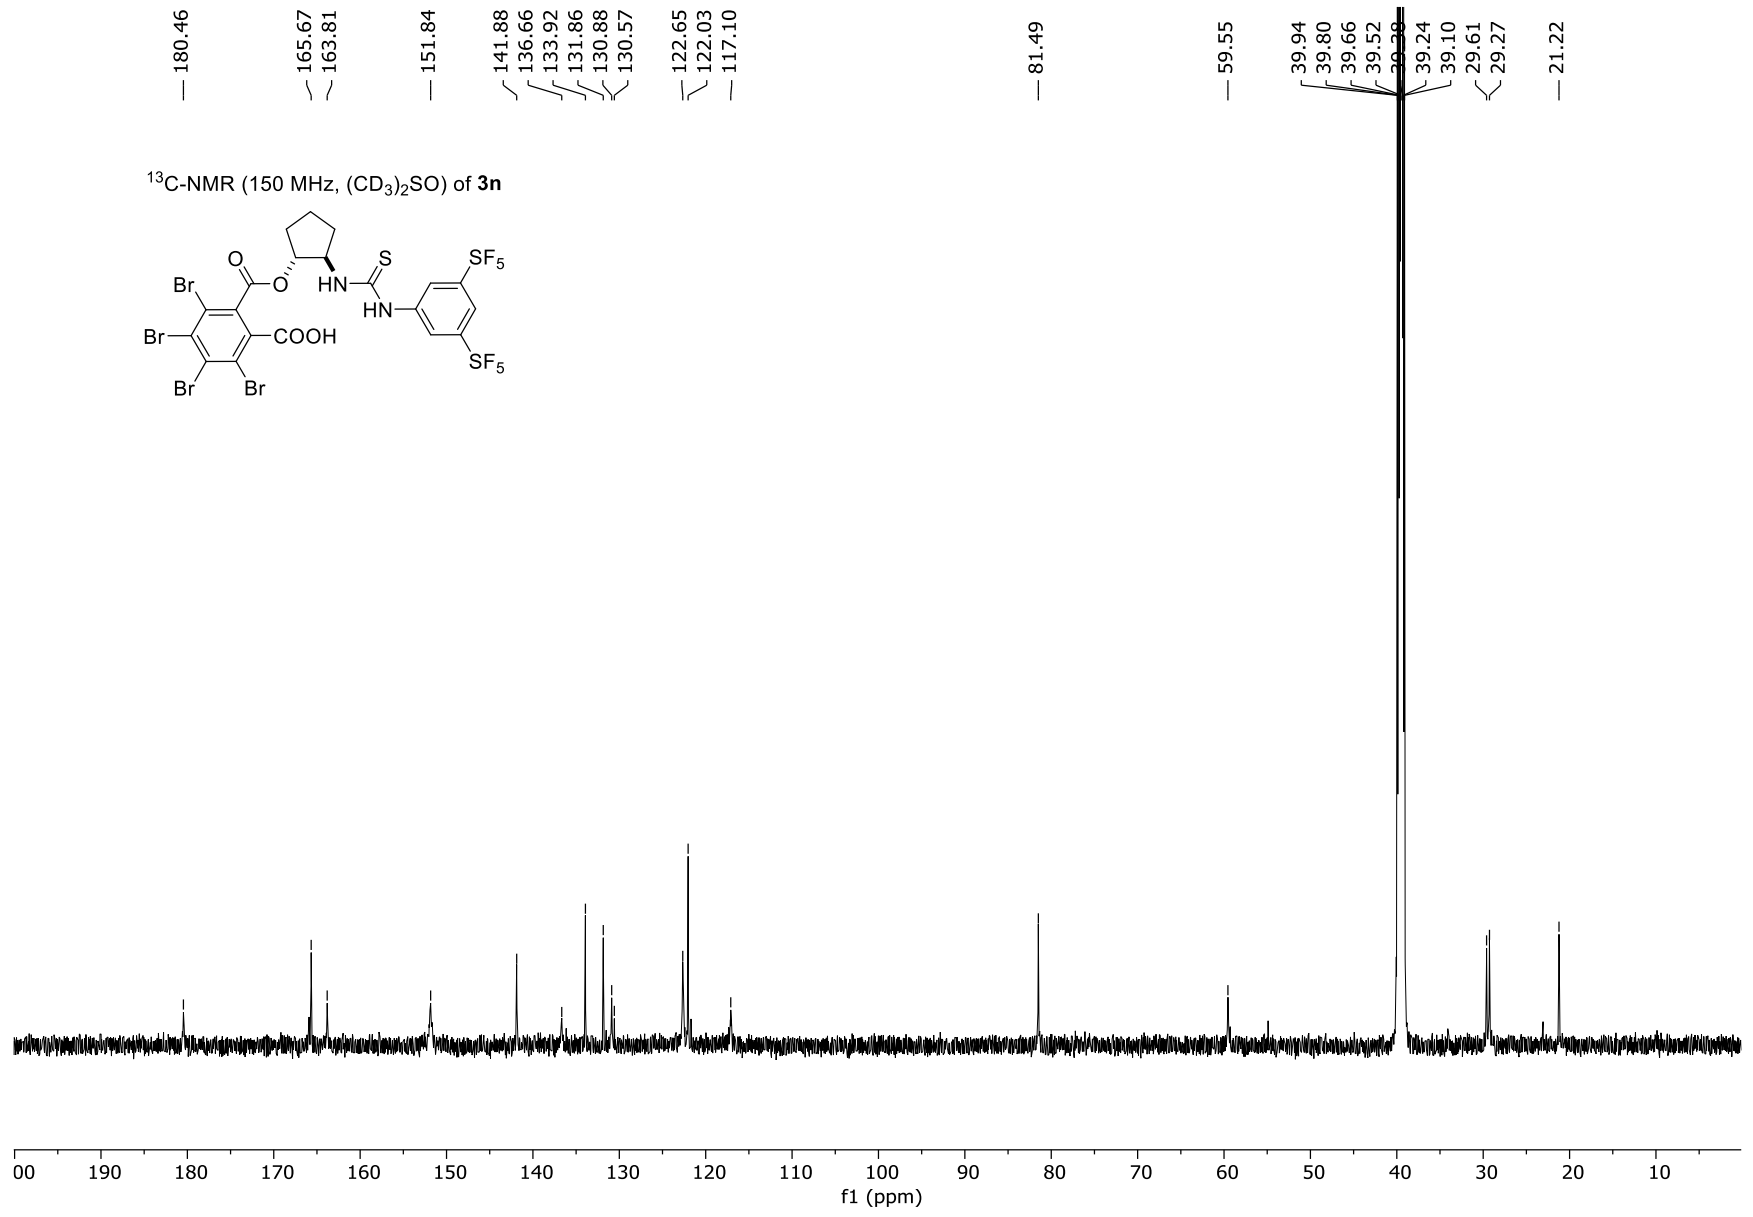

85.29  
84.89  
84.49  
84.09  
83.68  
64.21  
63.81

$^{19}\text{F}$ -NMR (377 MHz,  $(\text{CD}_3)_2\text{SO}$ ) of **3n**

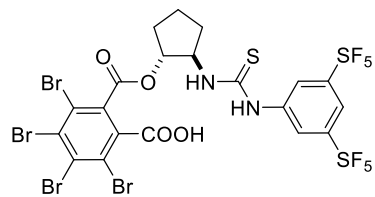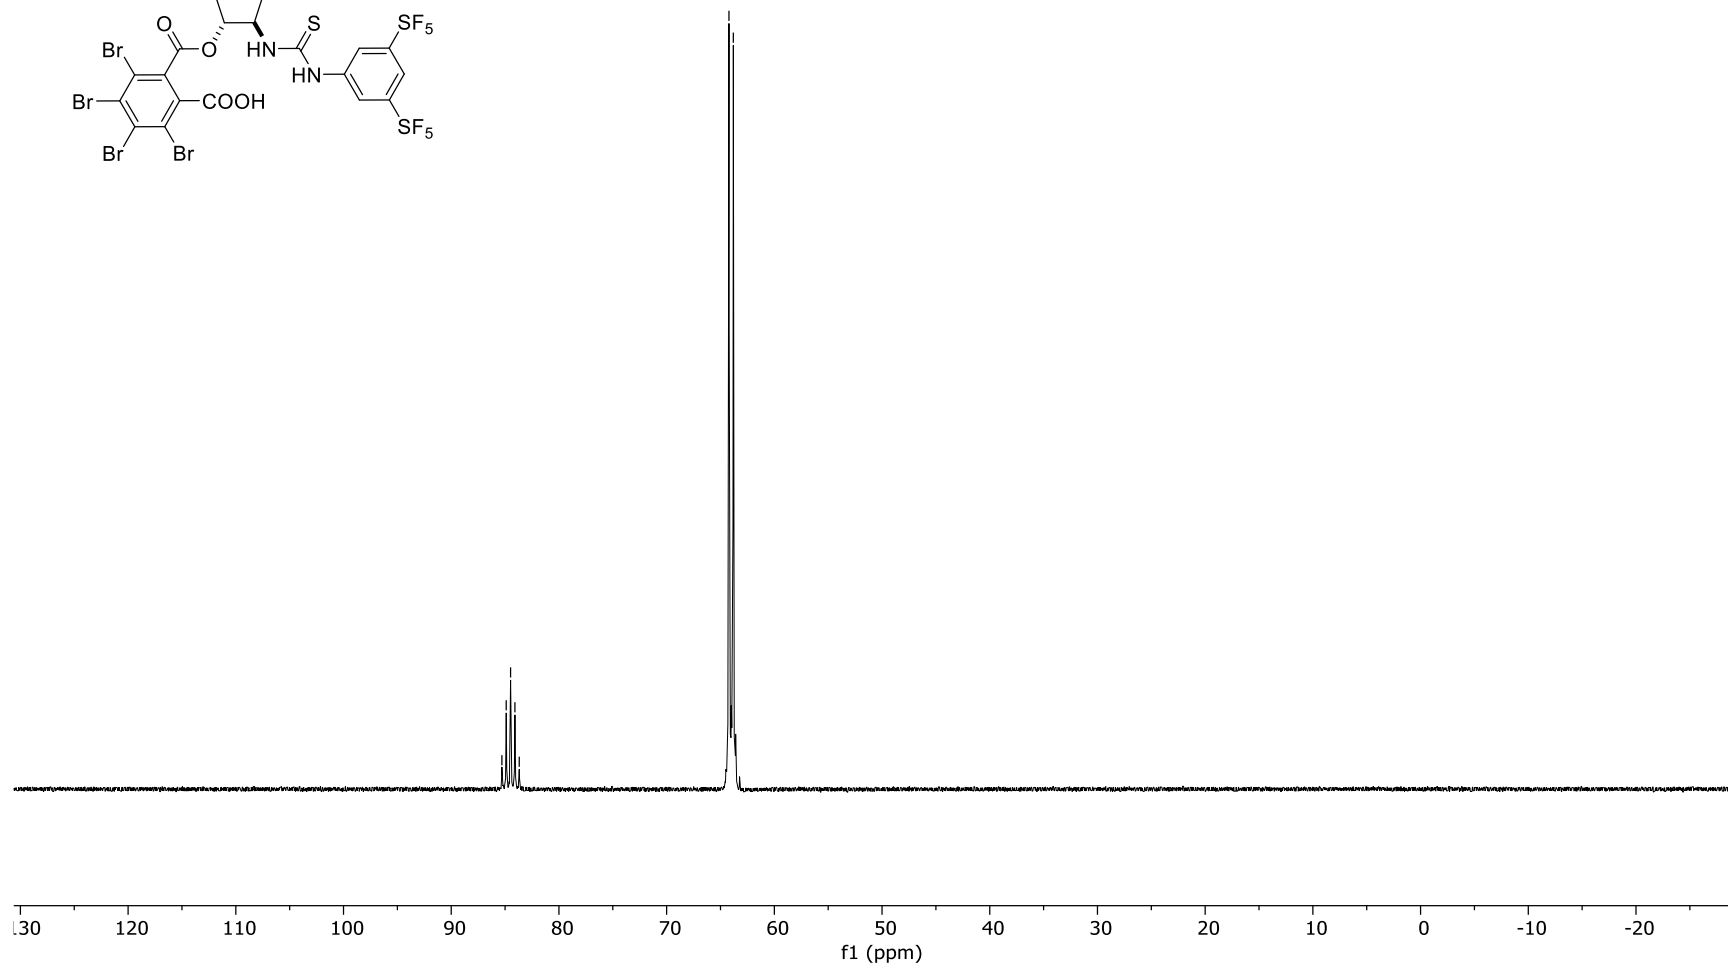

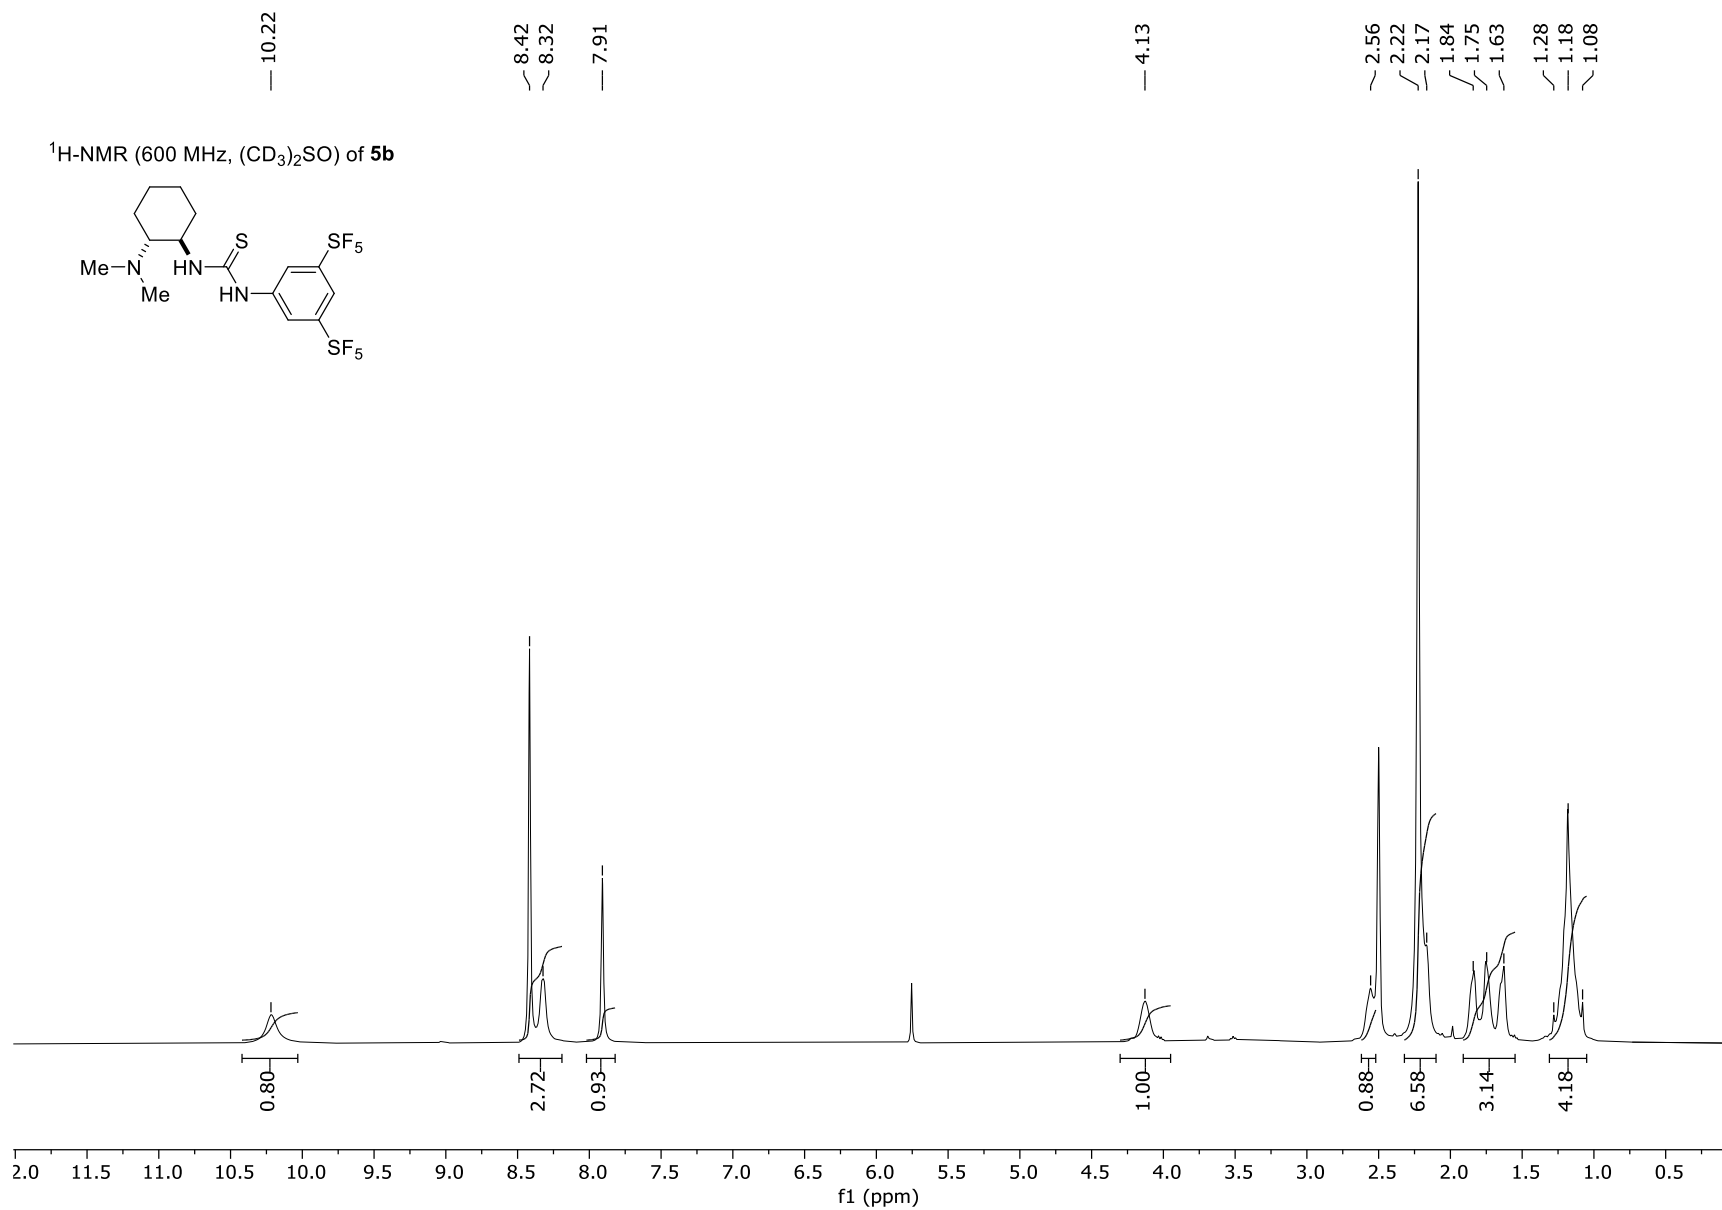

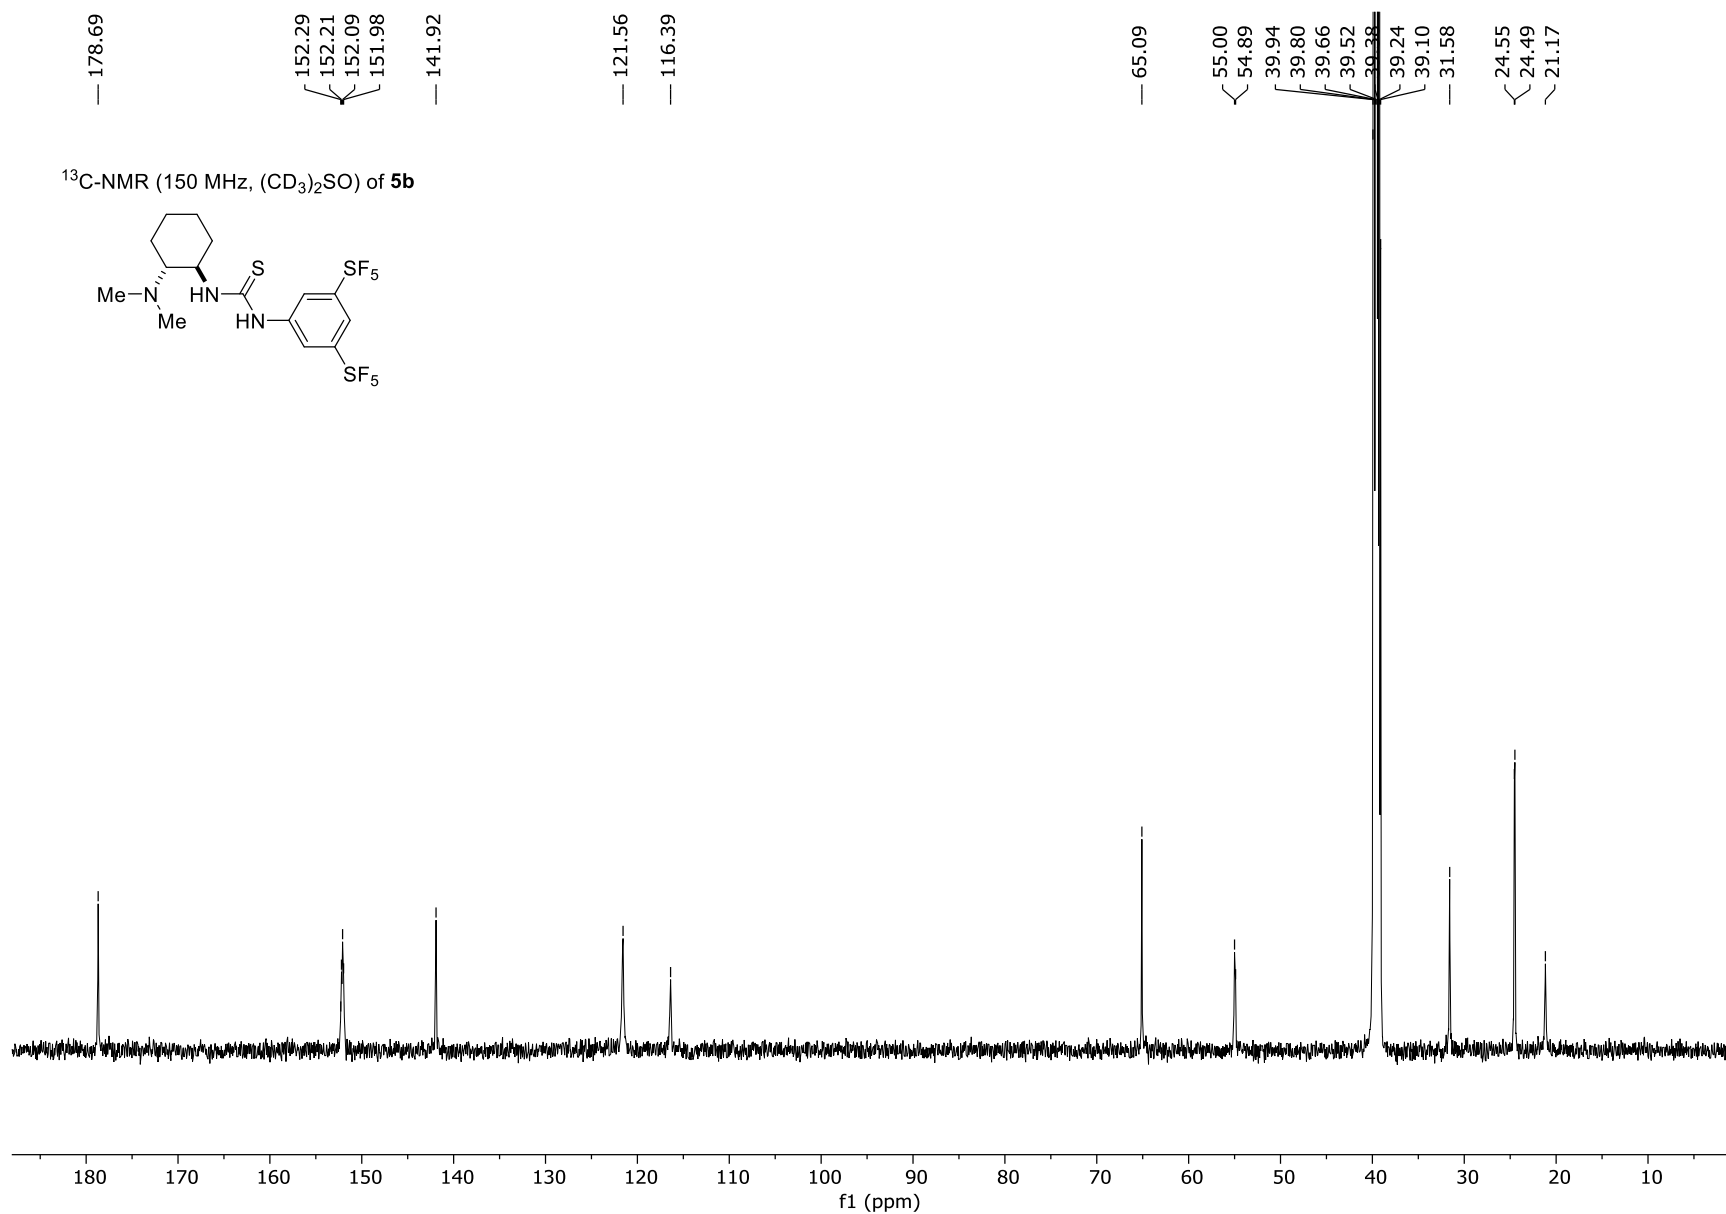



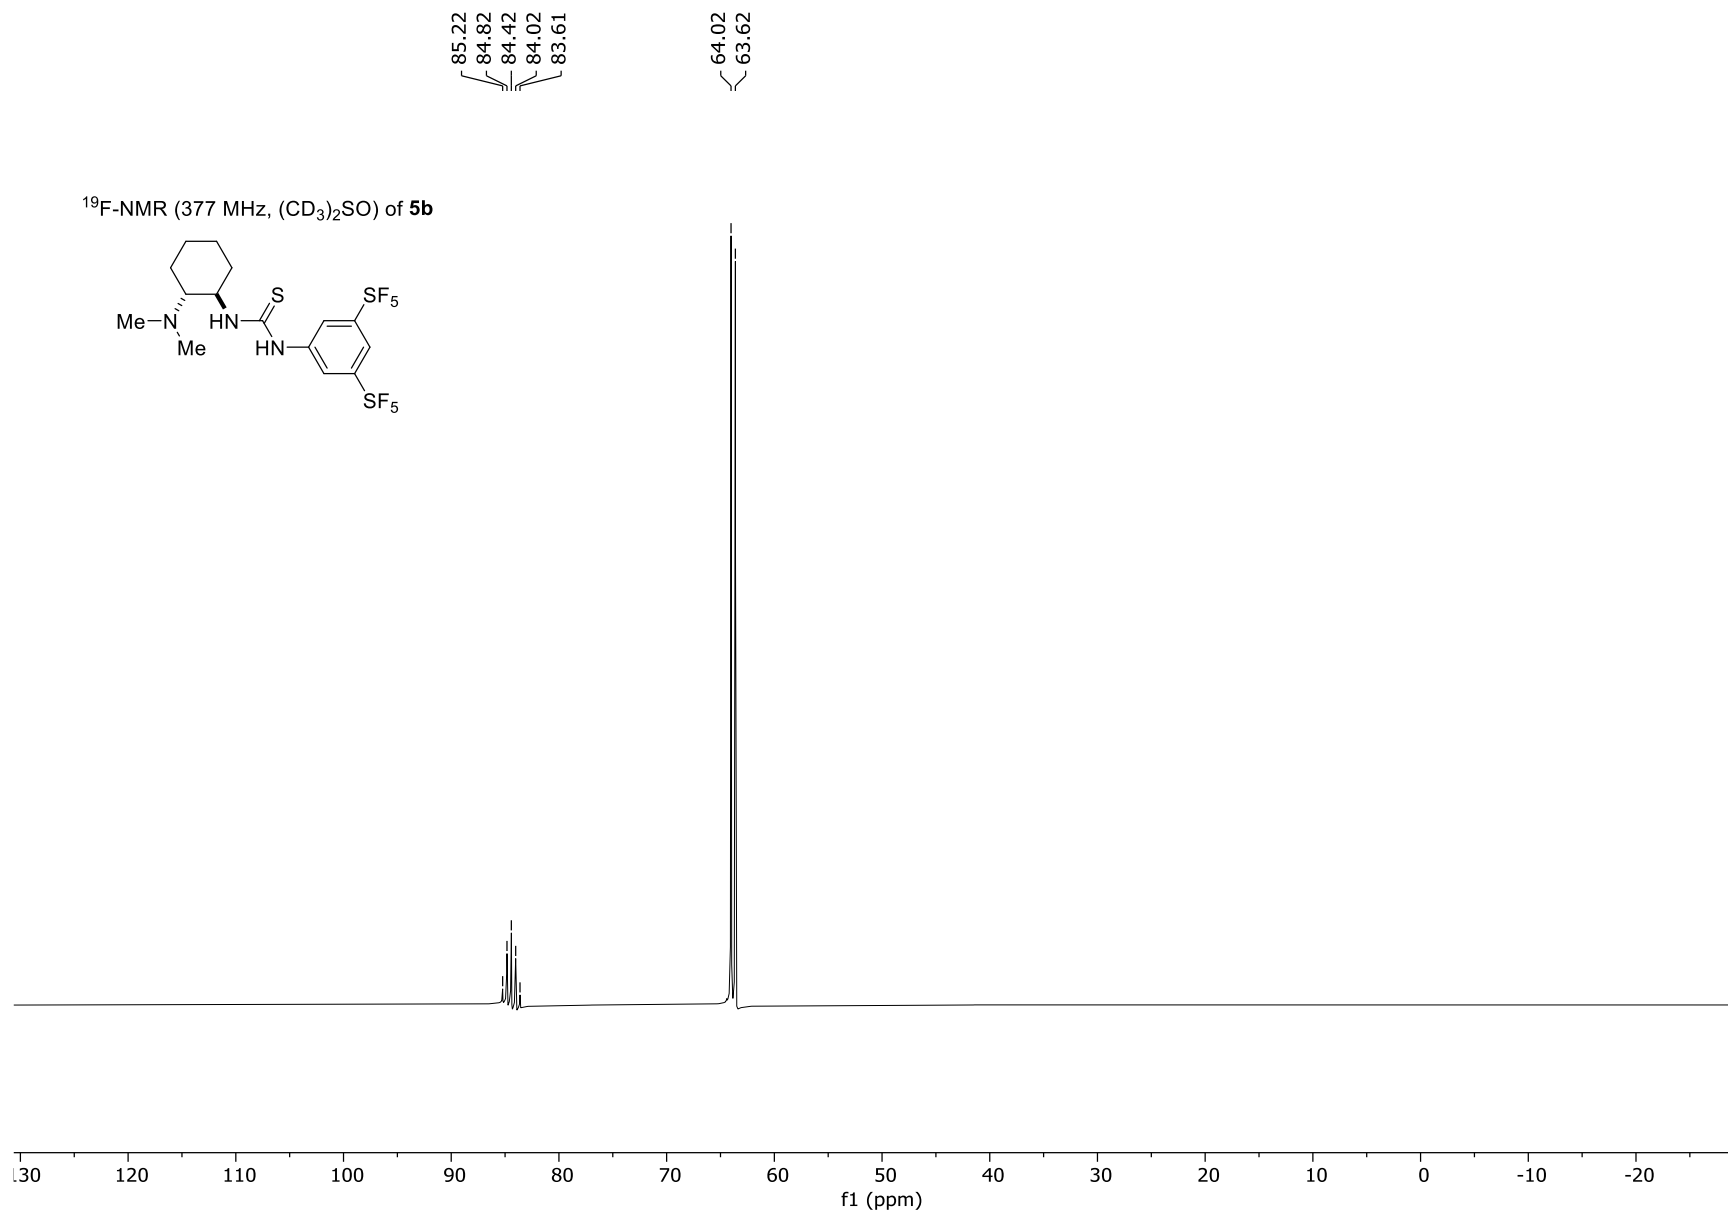

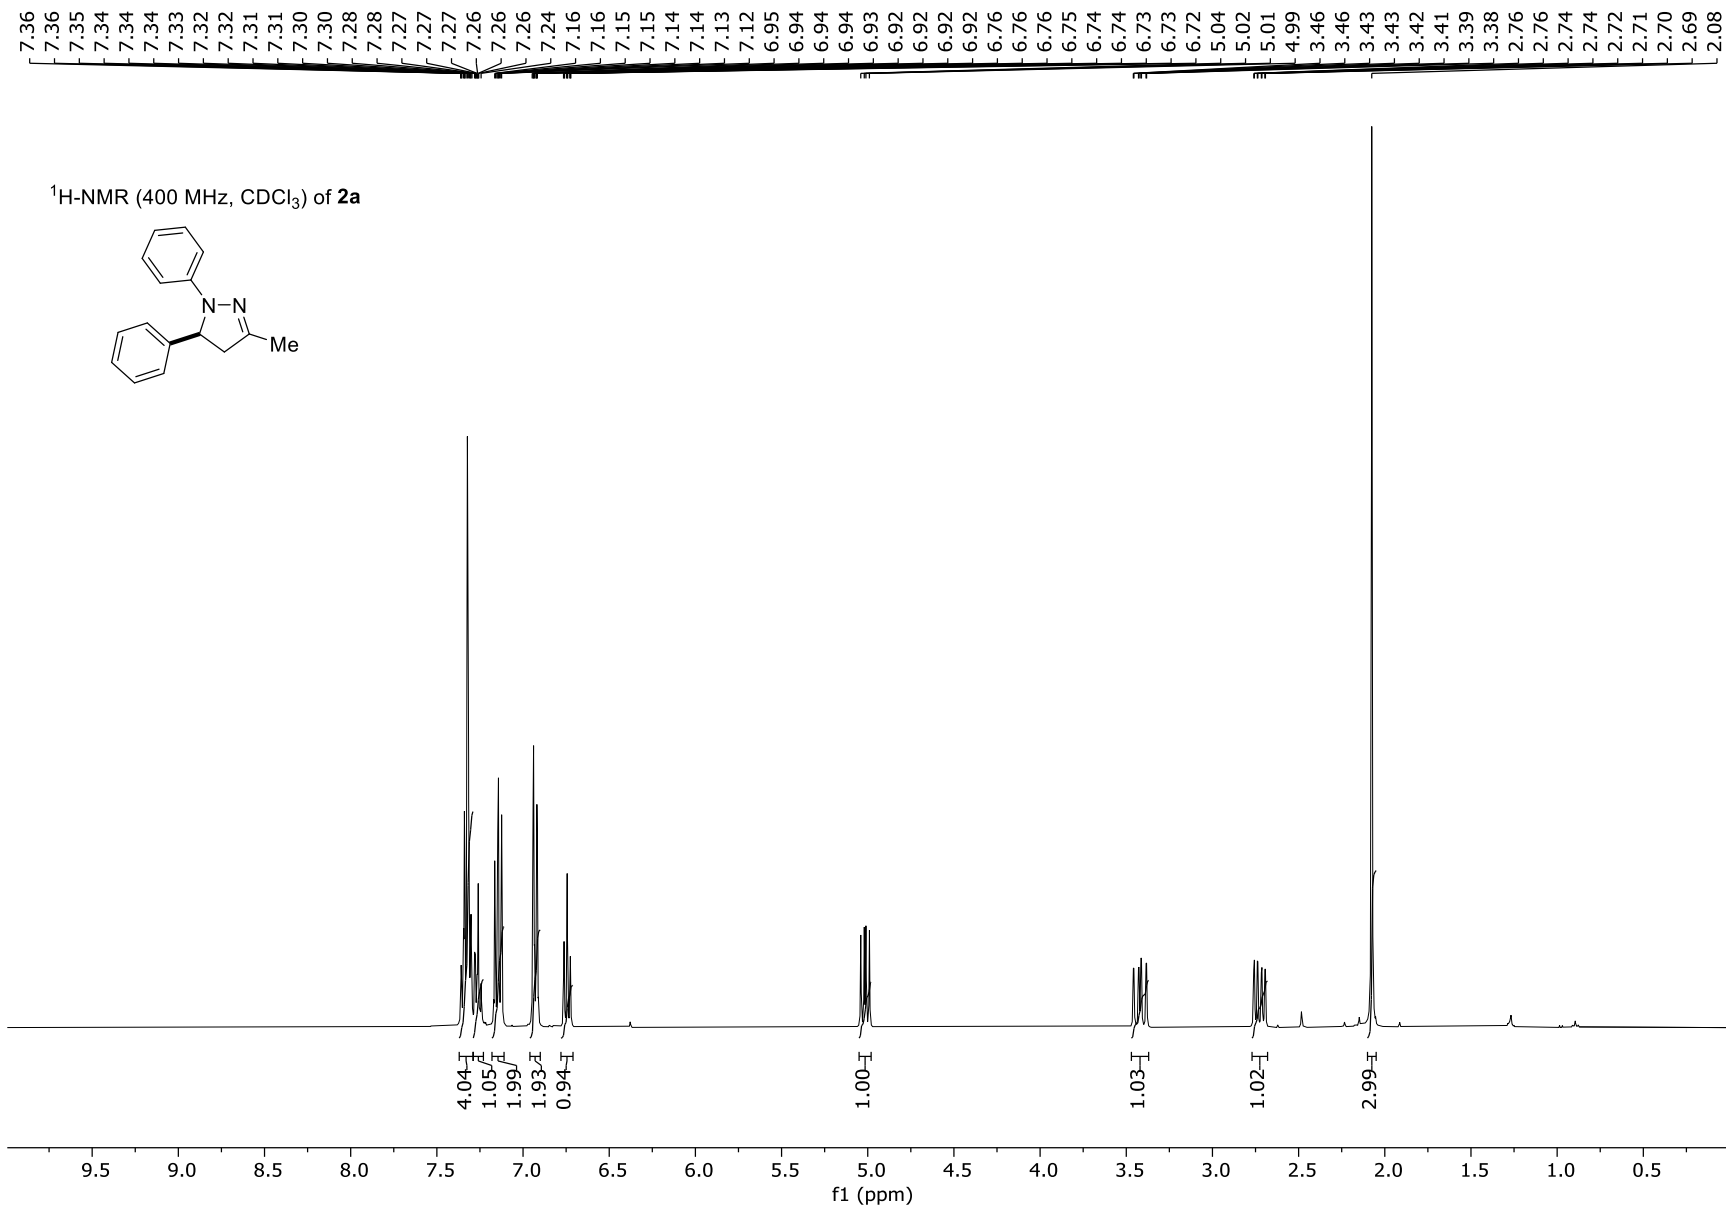

<sup>13</sup>C-NMR (100 MHz, CDCl<sub>3</sub>) of 2a

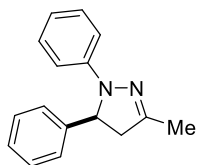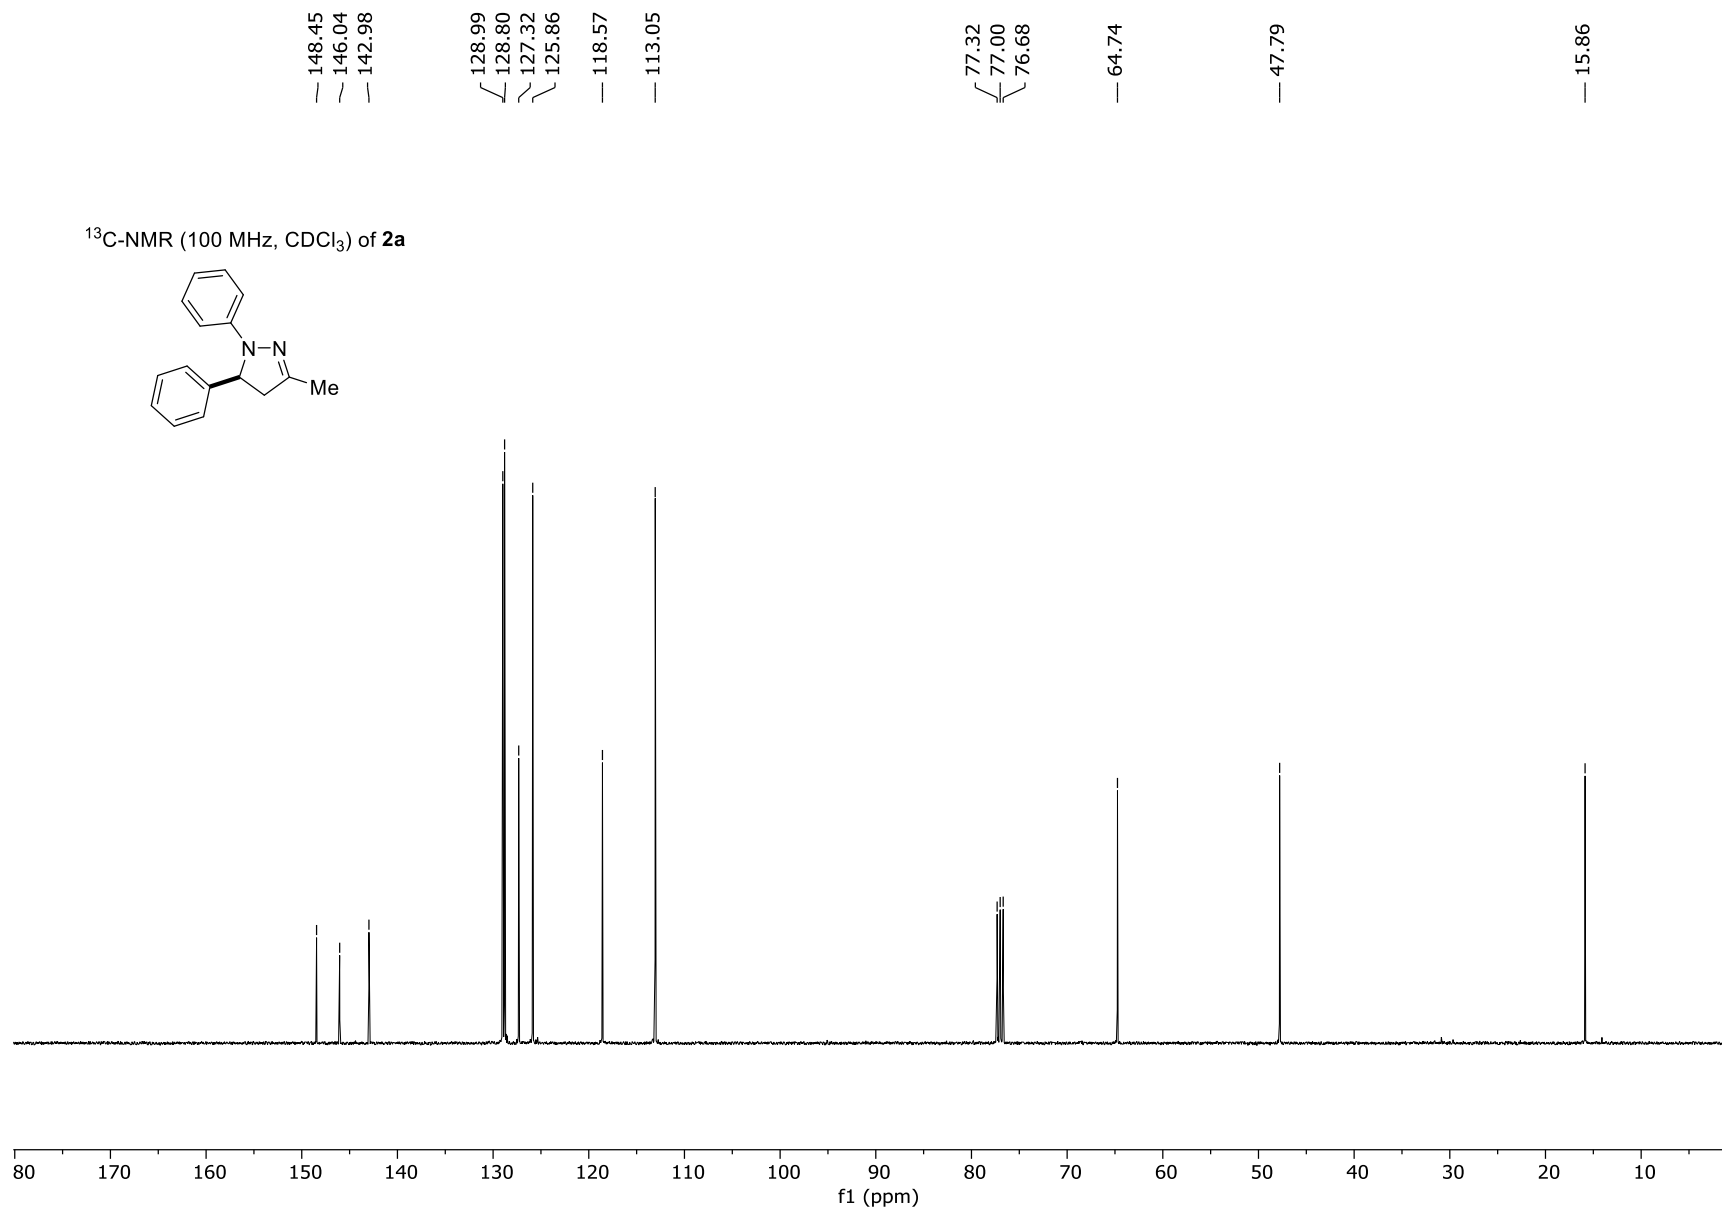

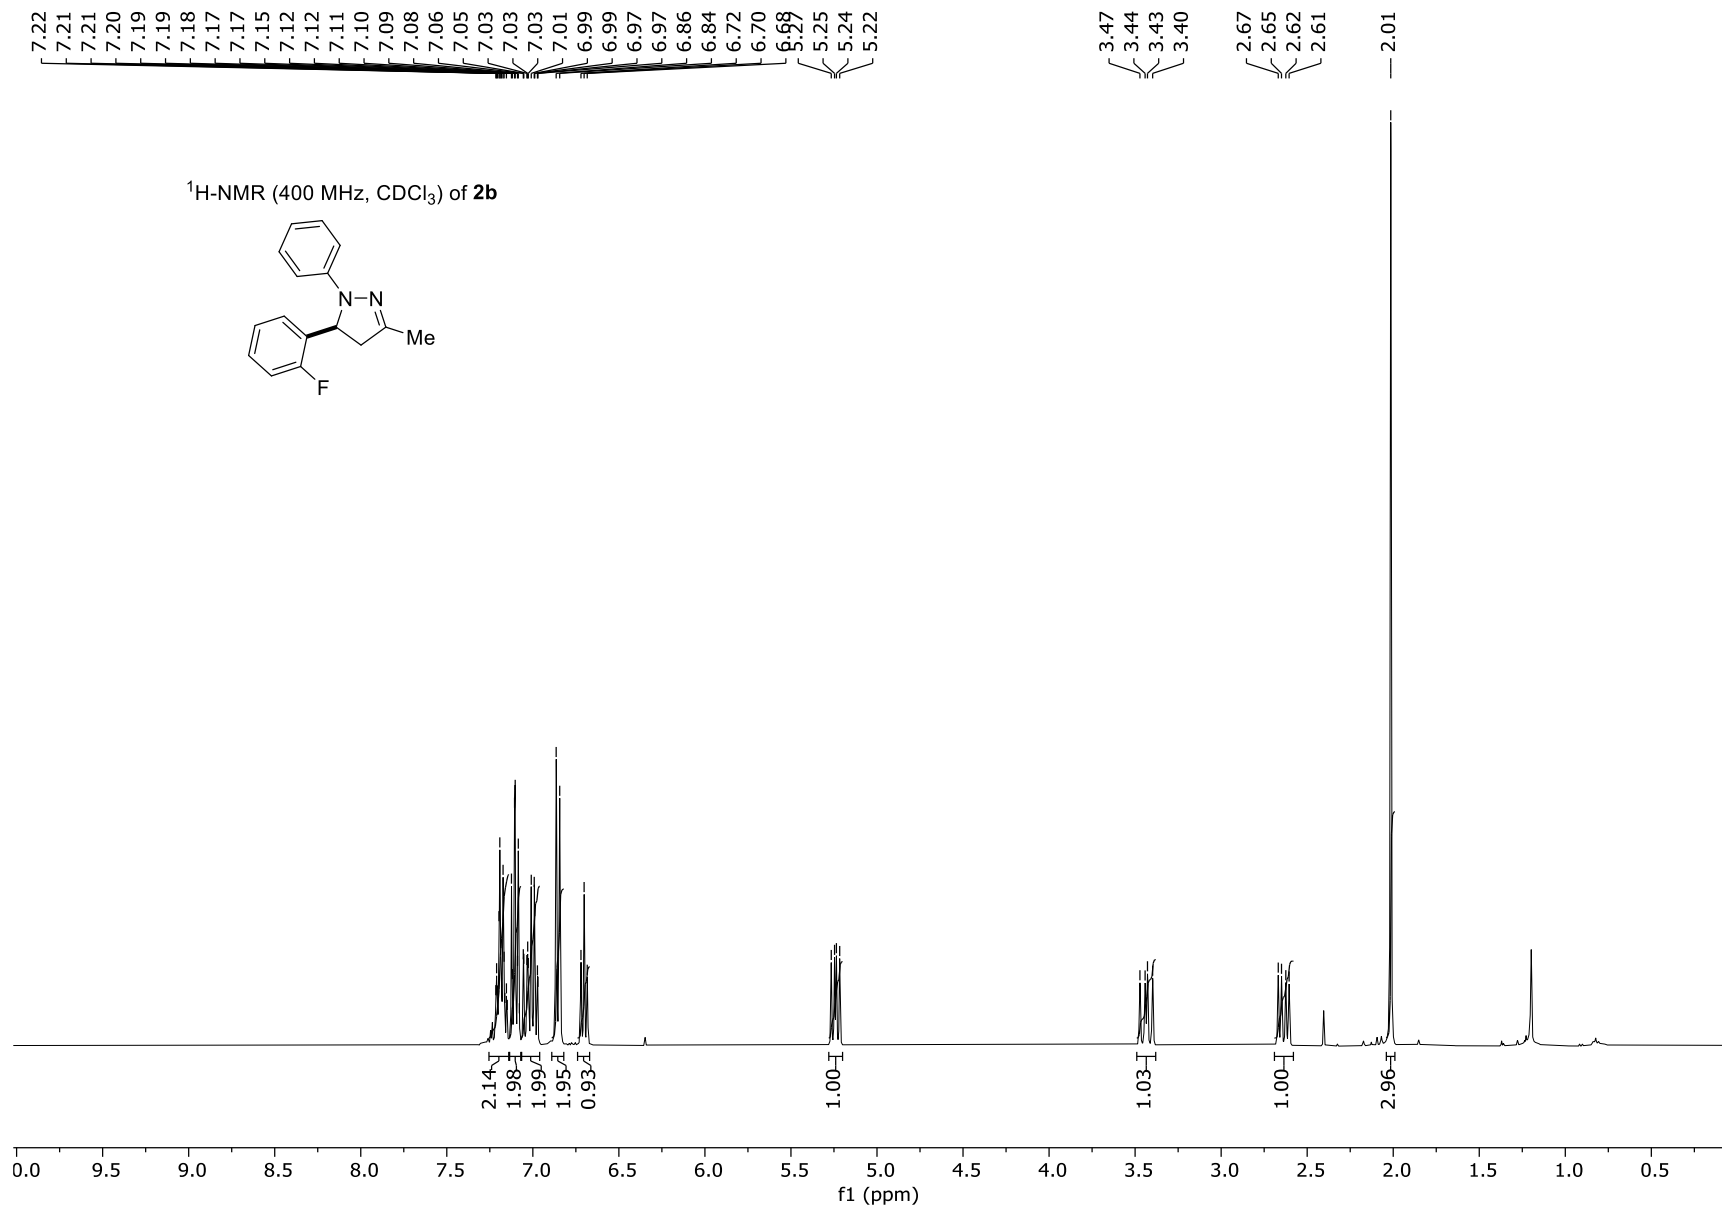

— 160.99  
— 158.56  
  
— 148.96  
— 145.79  
  
129.52  
129.39  
128.93  
128.84  
127.61  
127.57  
124.68  
124.65  
118.77  
115.62  
115.41  
112.94

77.32  
77.00  
76.68

57.98  
57.95

— 46.32

— 15.87

<sup>13</sup>C-NMR (100 MHz, CDCl<sub>3</sub>) of **2b**

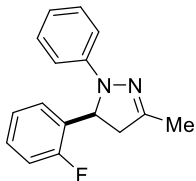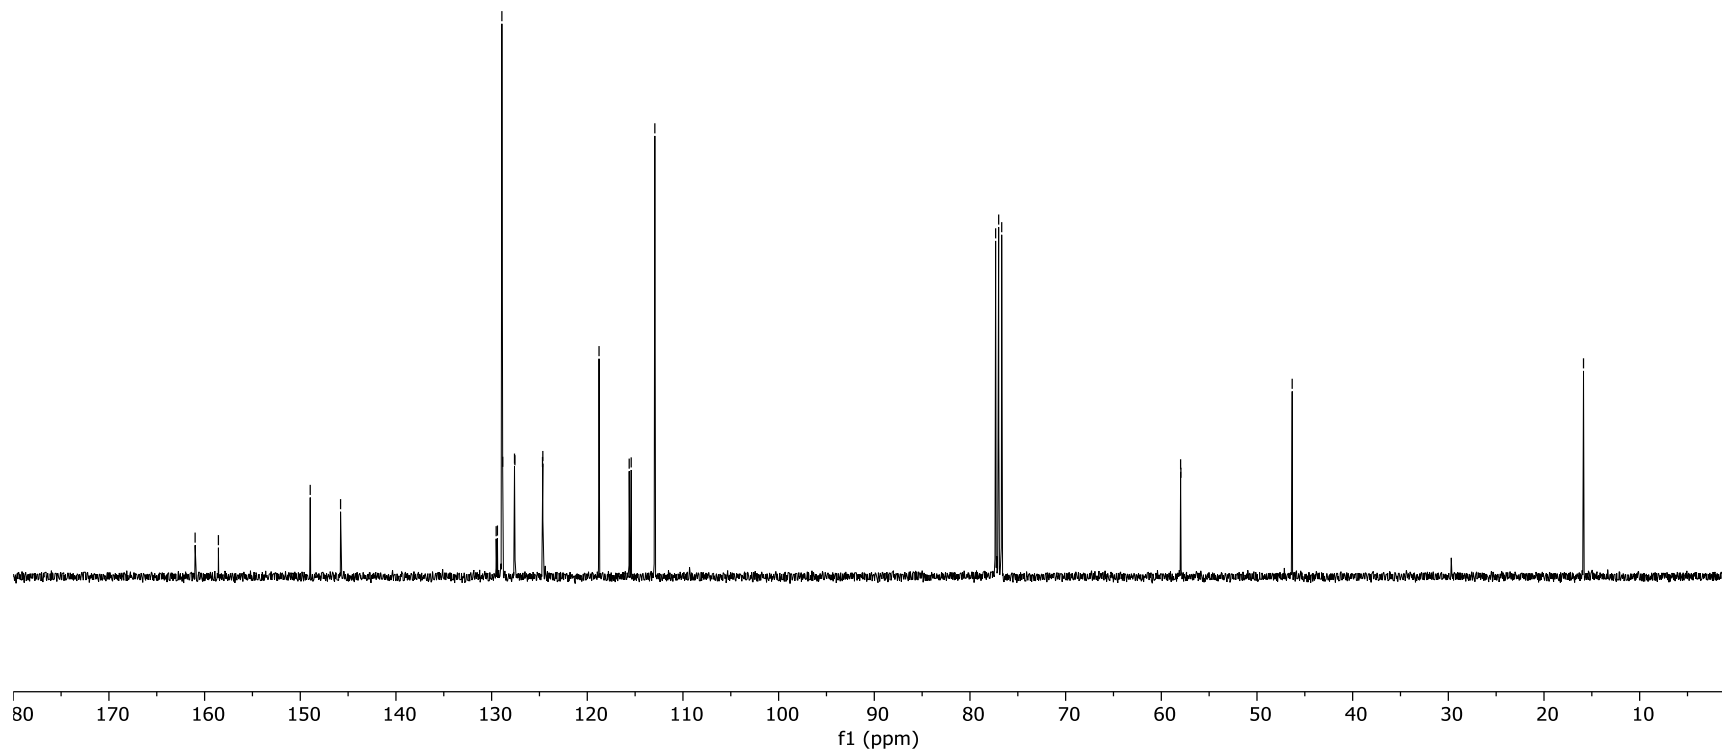

$^{19}\text{F}$ -NMR (377 MHz,  $\text{CDCl}_3$ ) of **2b**

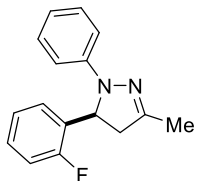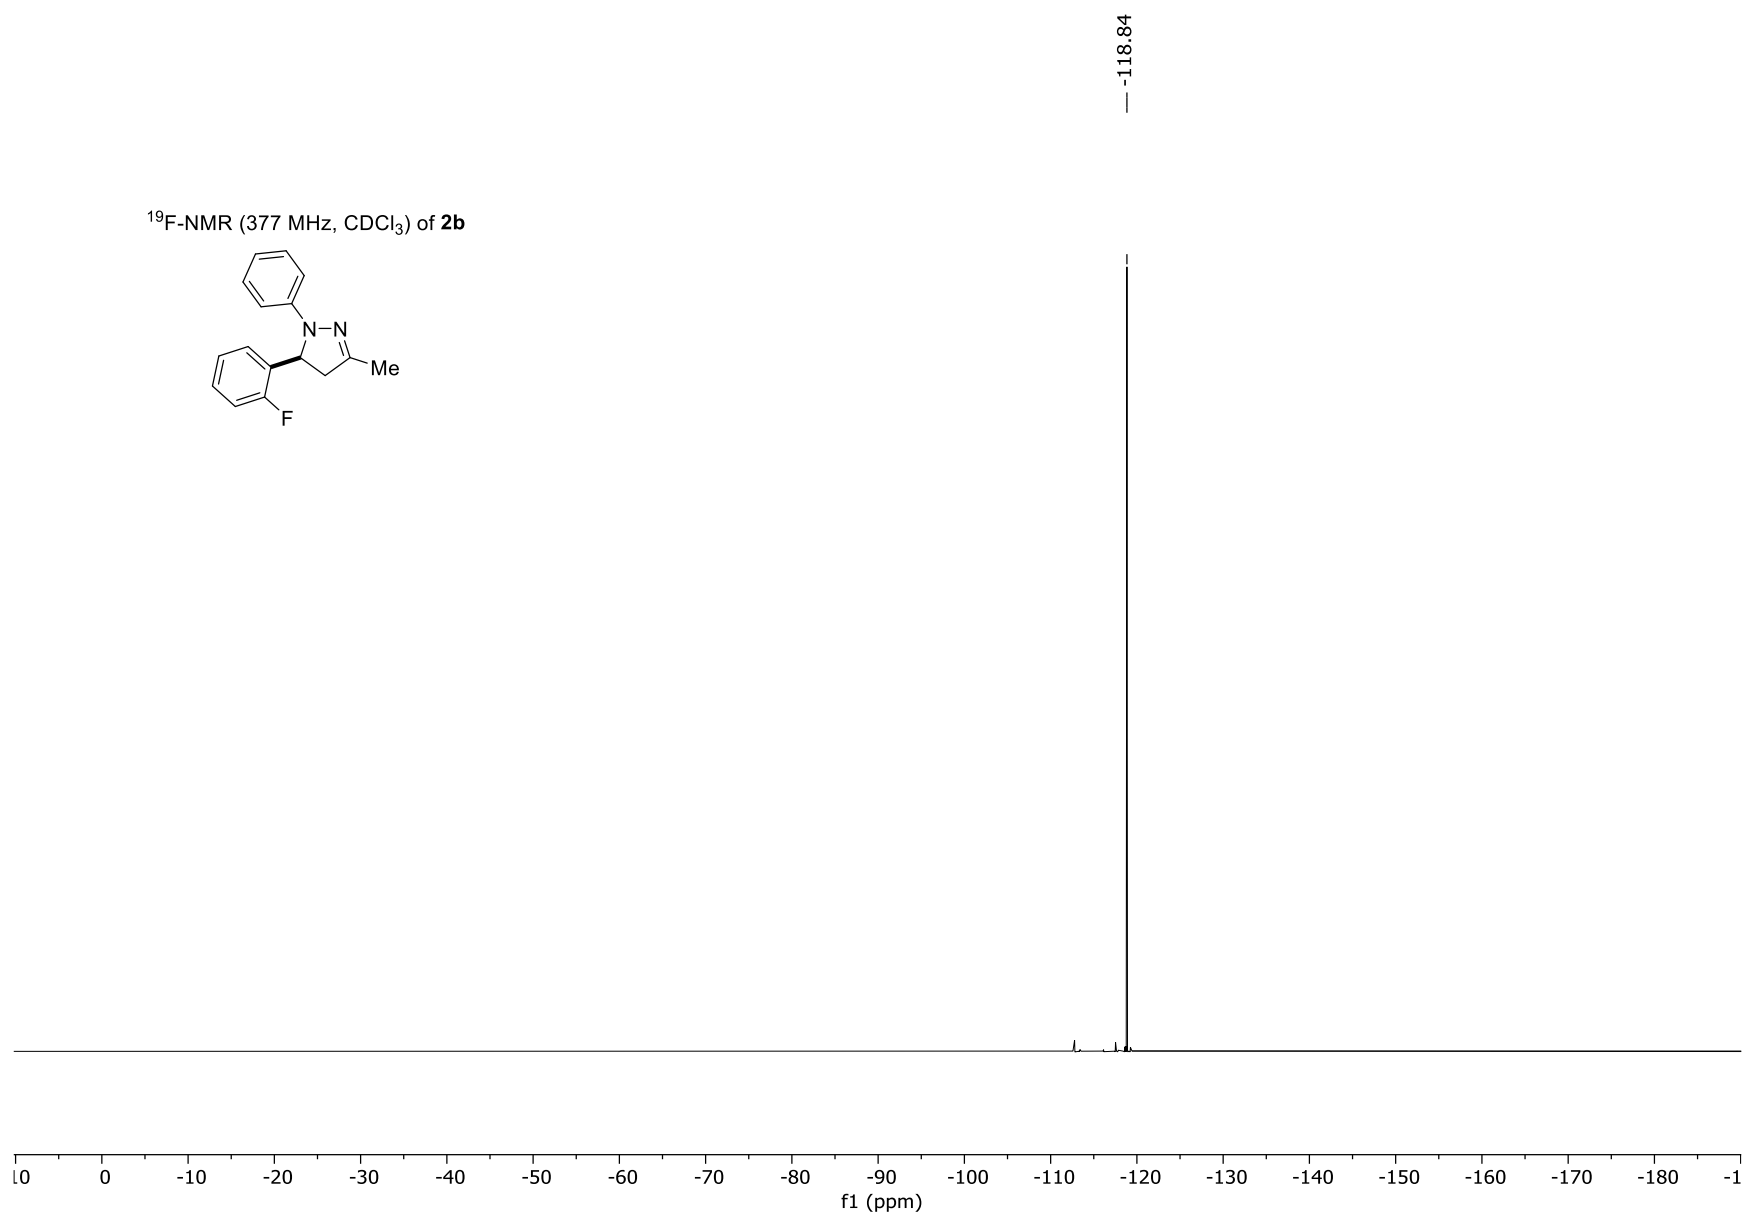

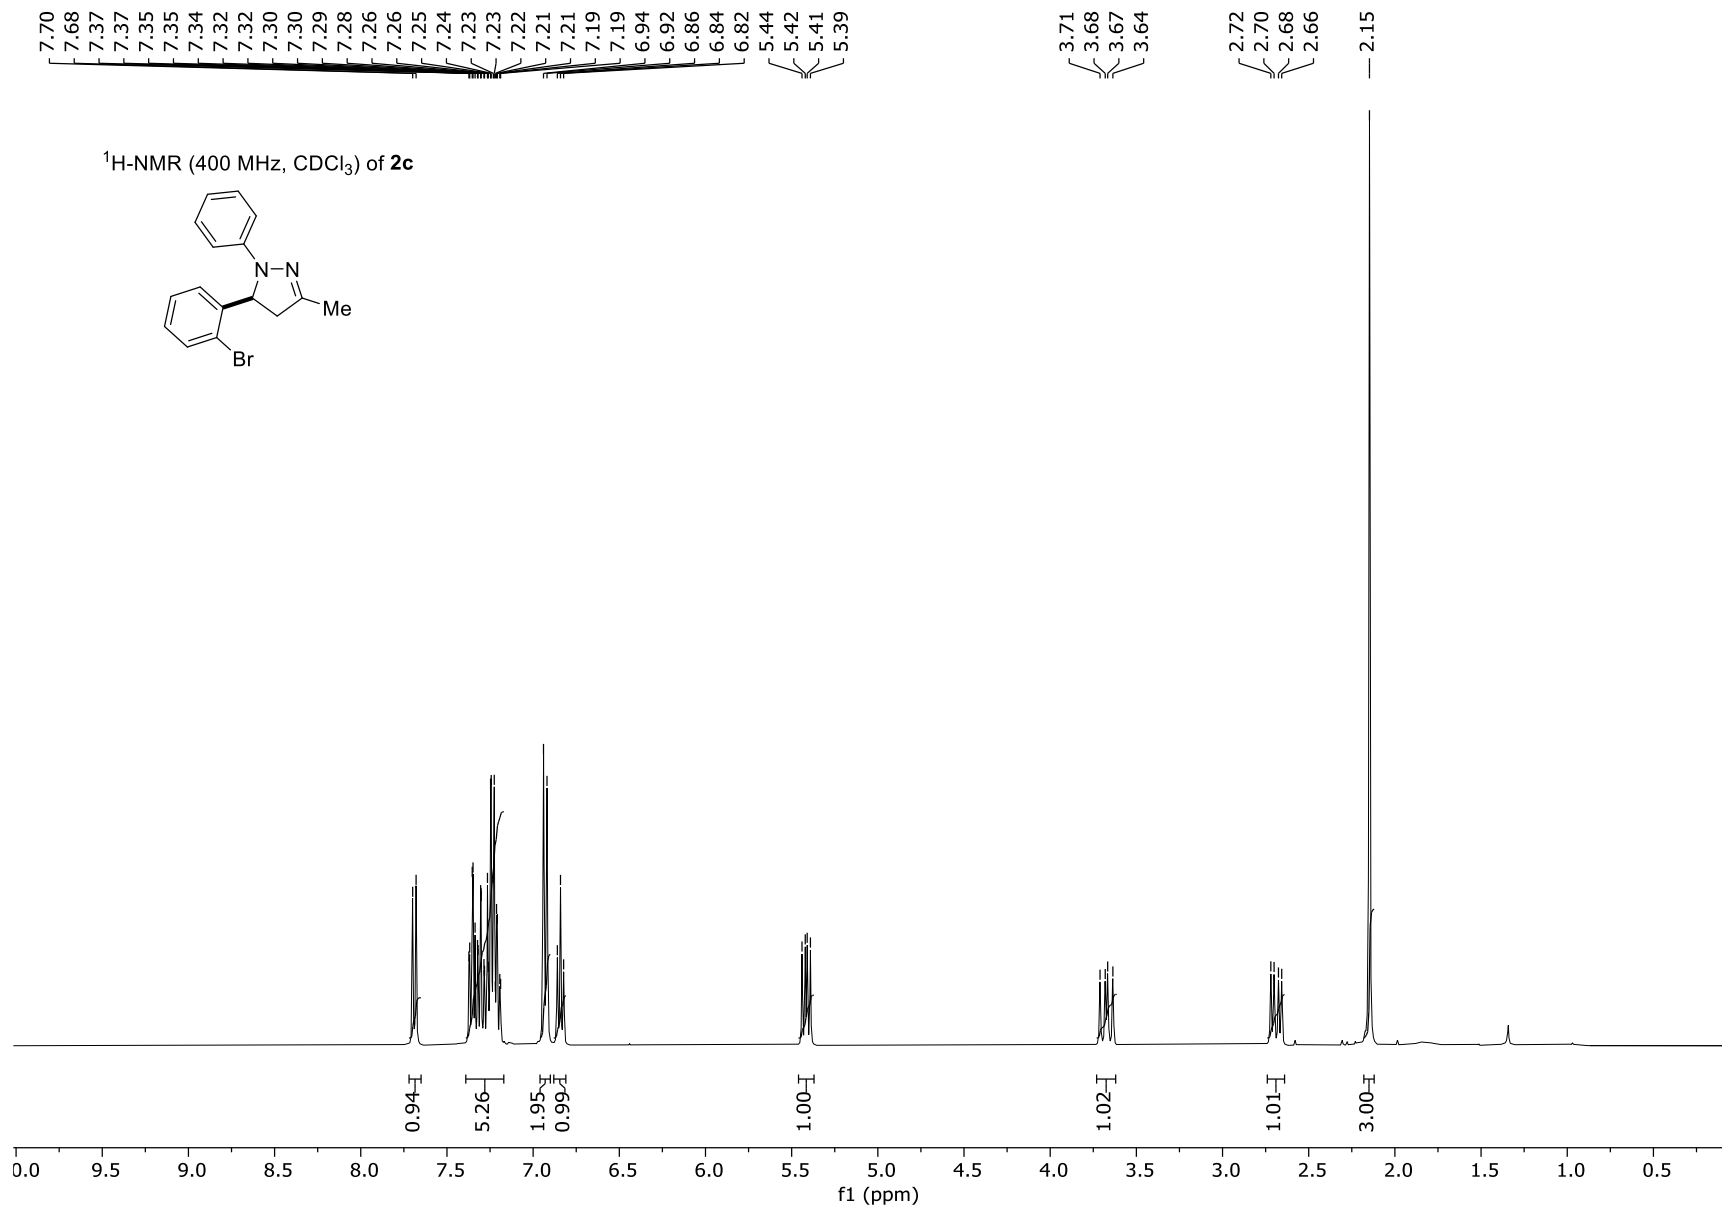

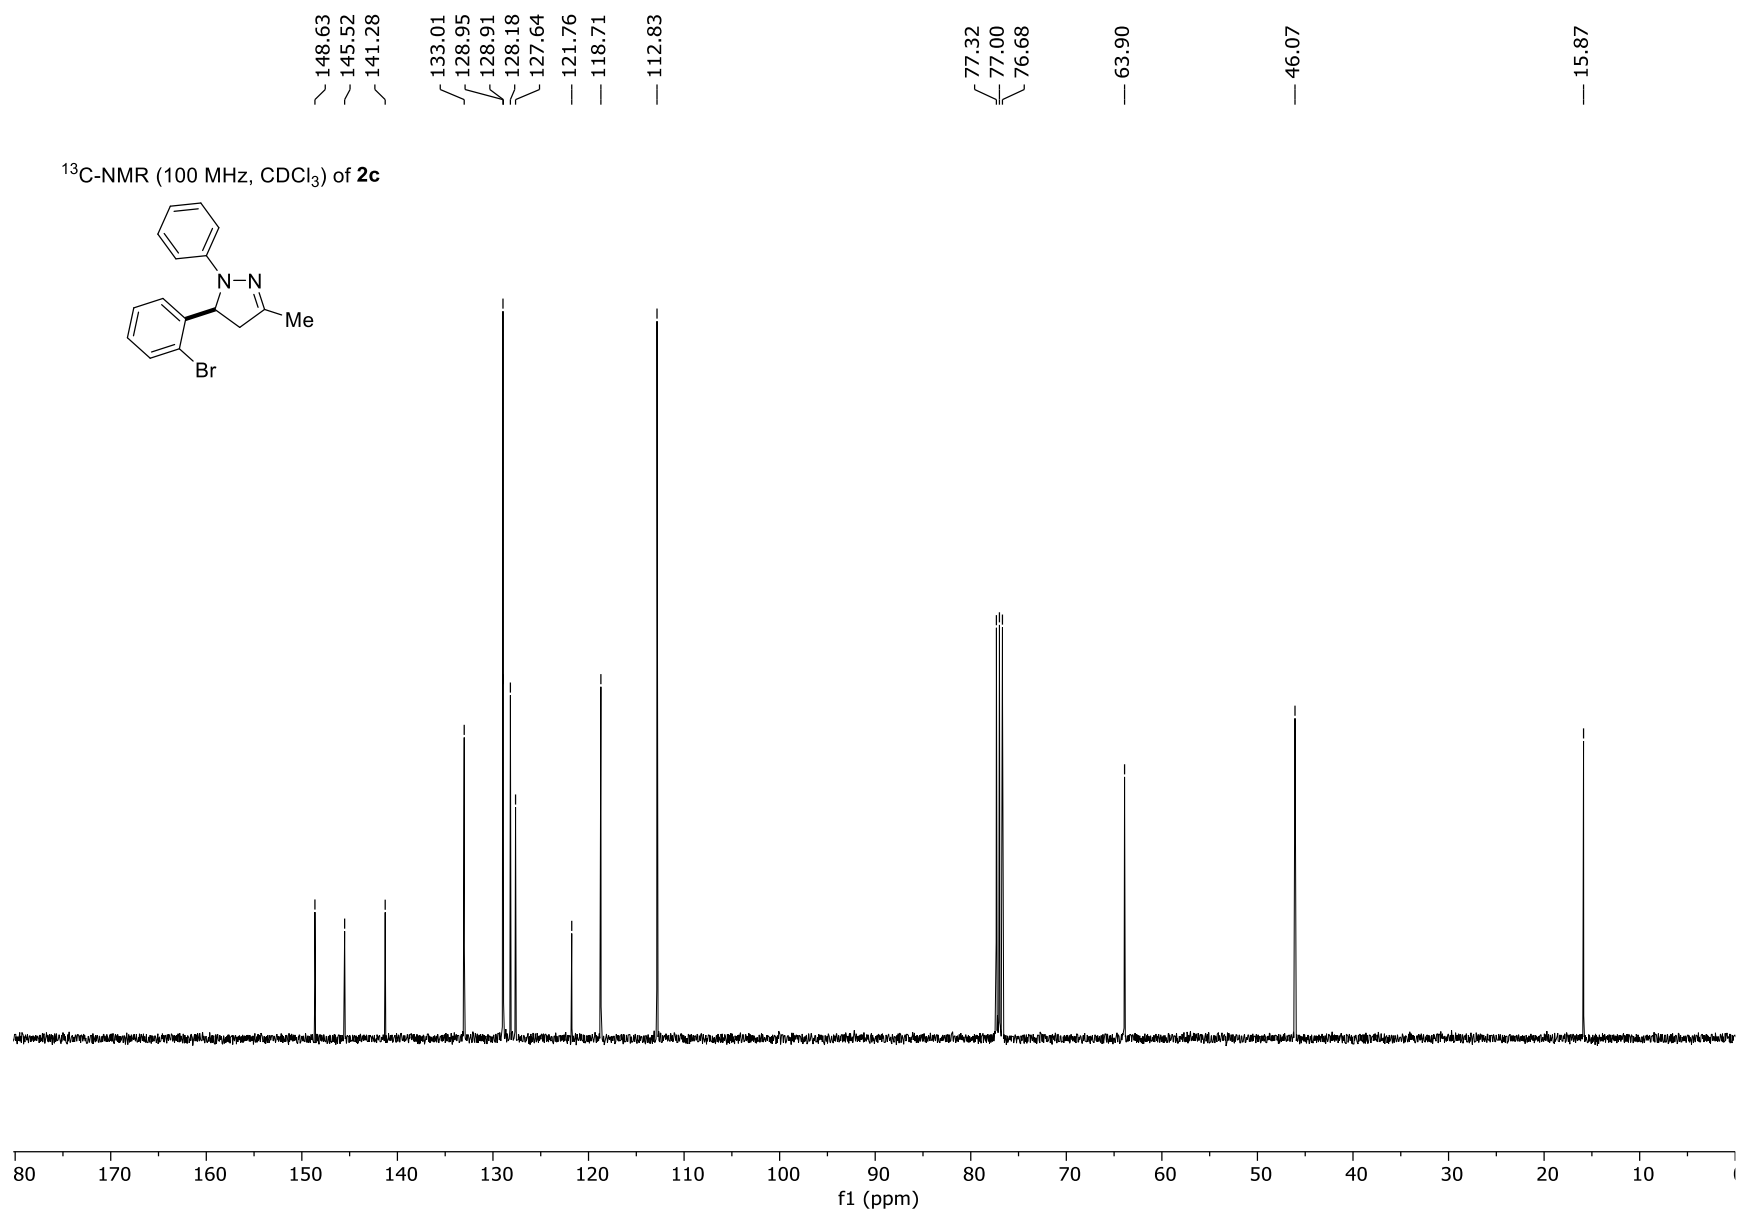



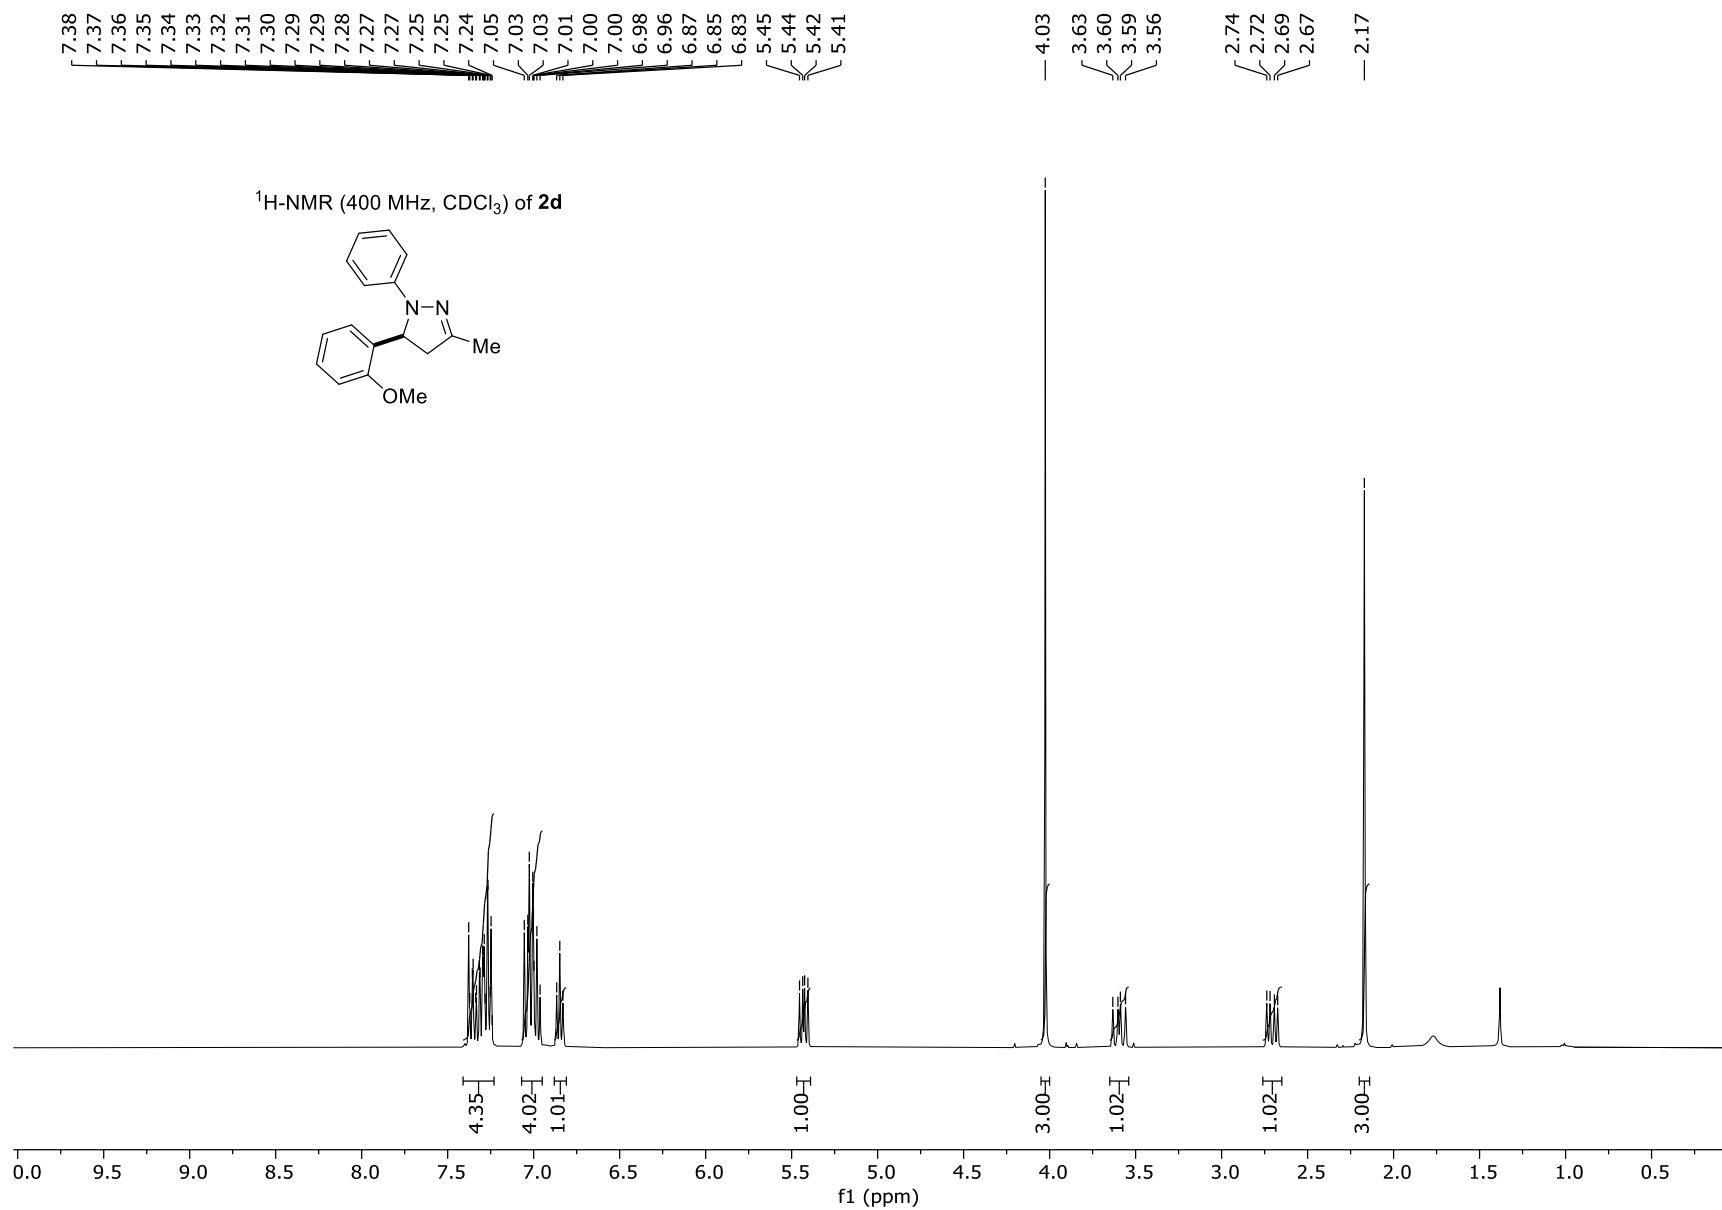

<sup>13</sup>C-NMR (100 MHz, CDCl<sub>3</sub>) of **2d**

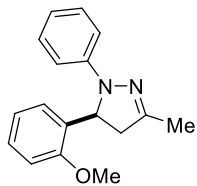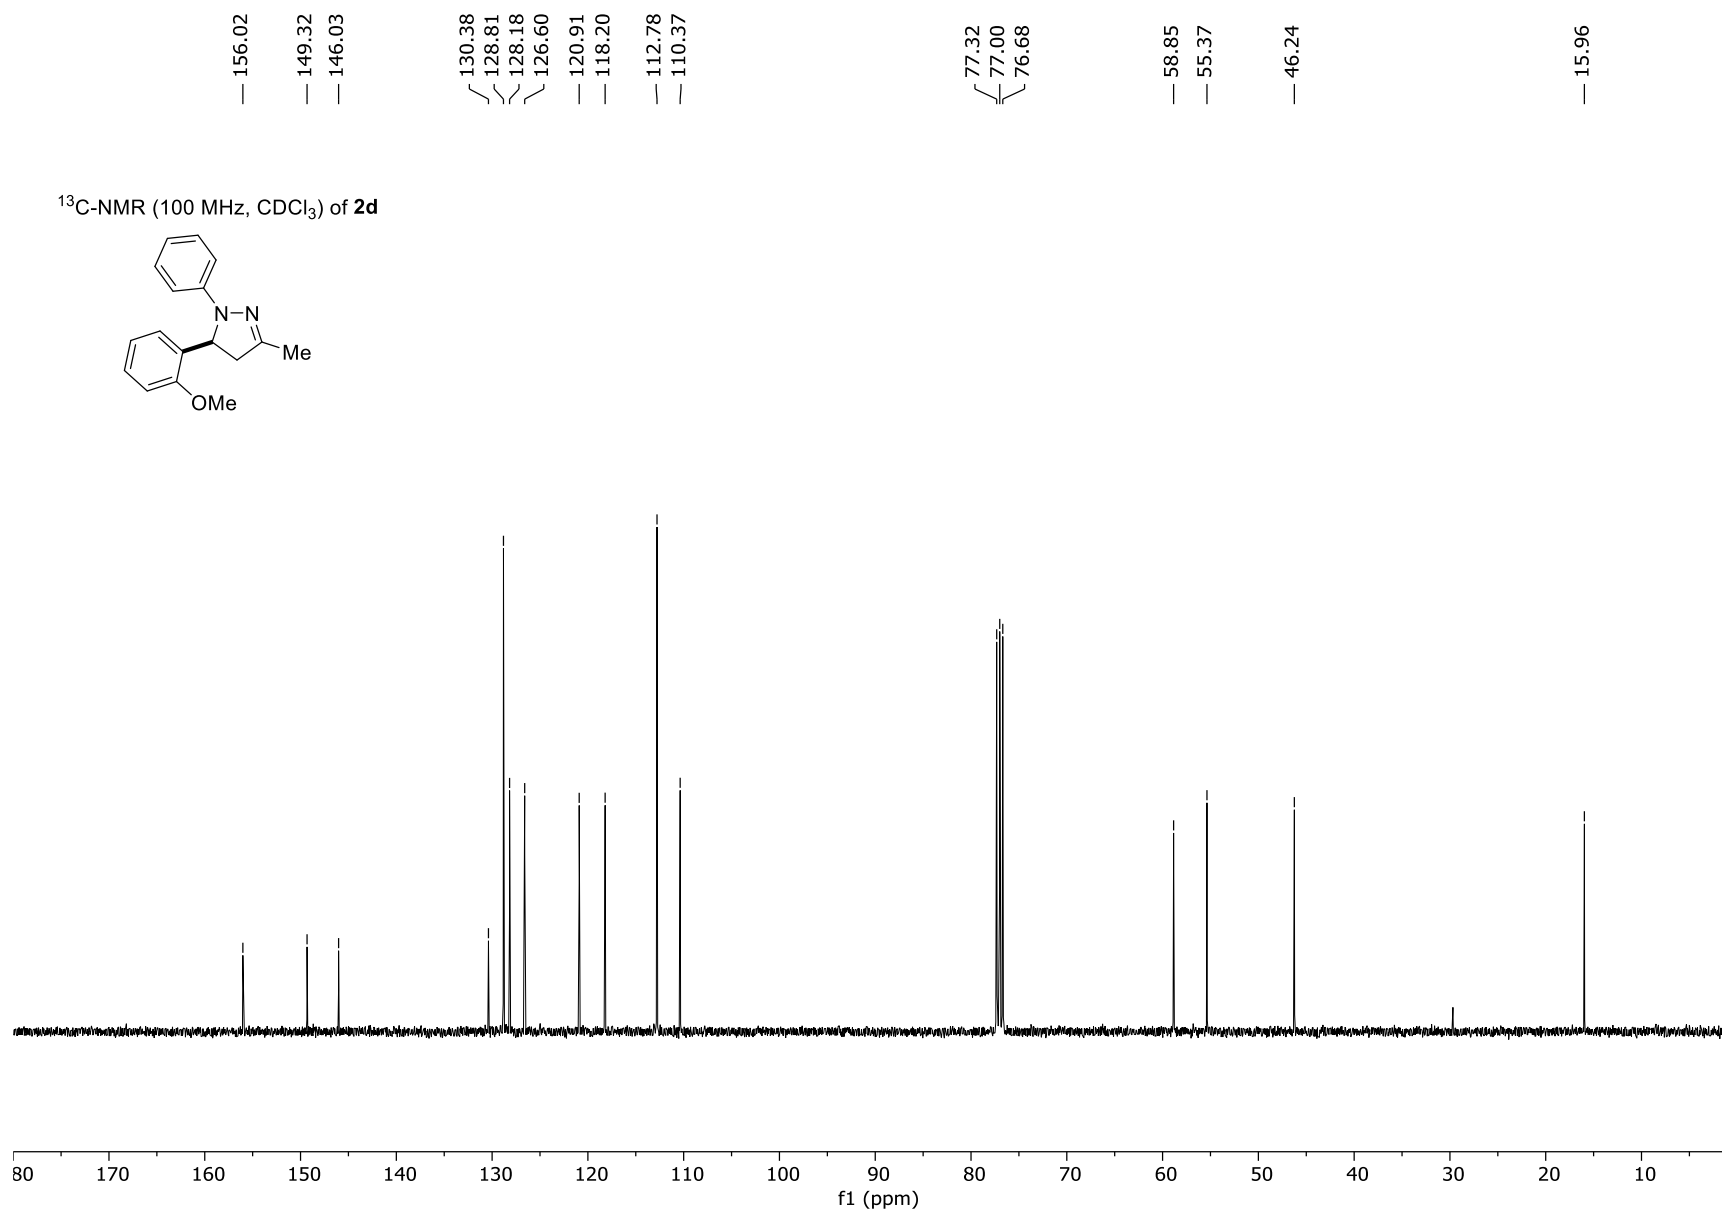

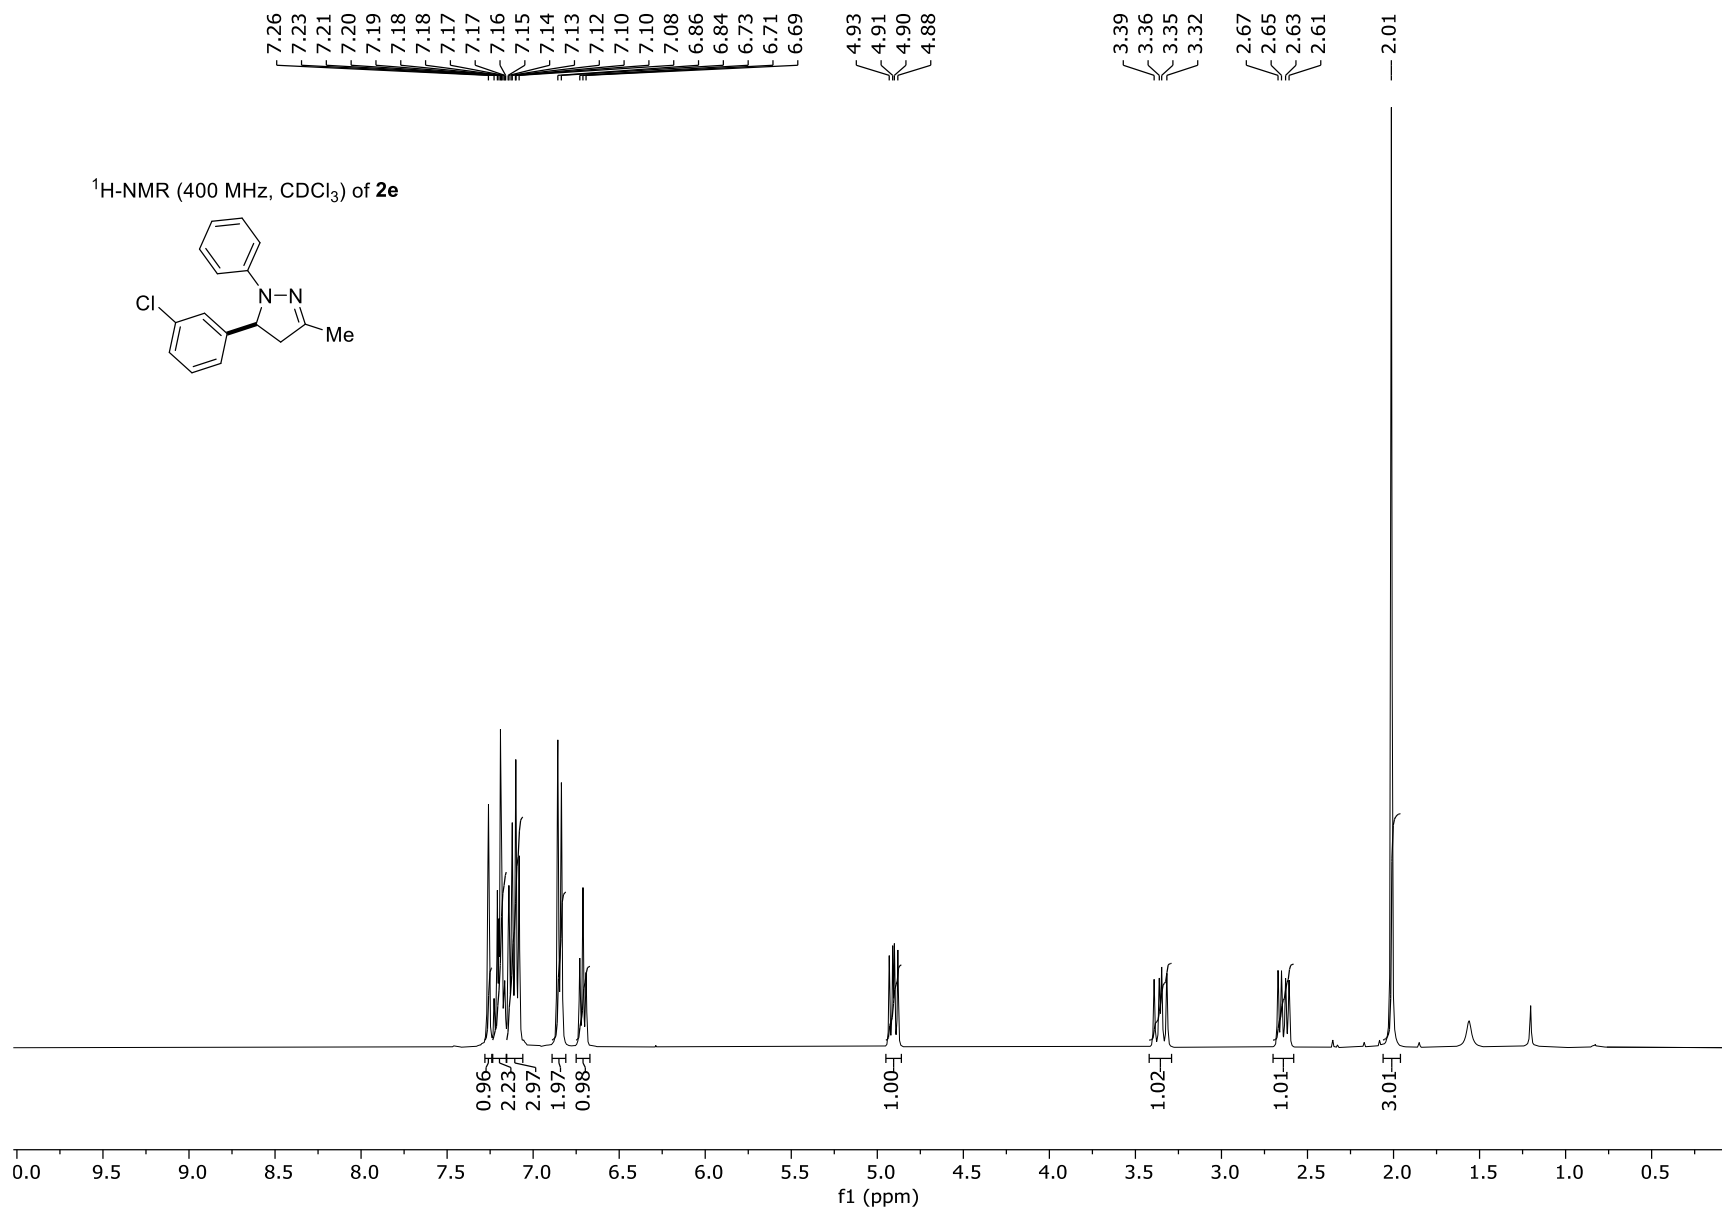

<sup>13</sup>C-NMR (100 MHz, CDCl<sub>3</sub>) of **2e**

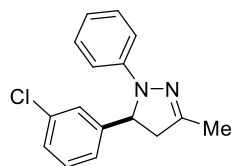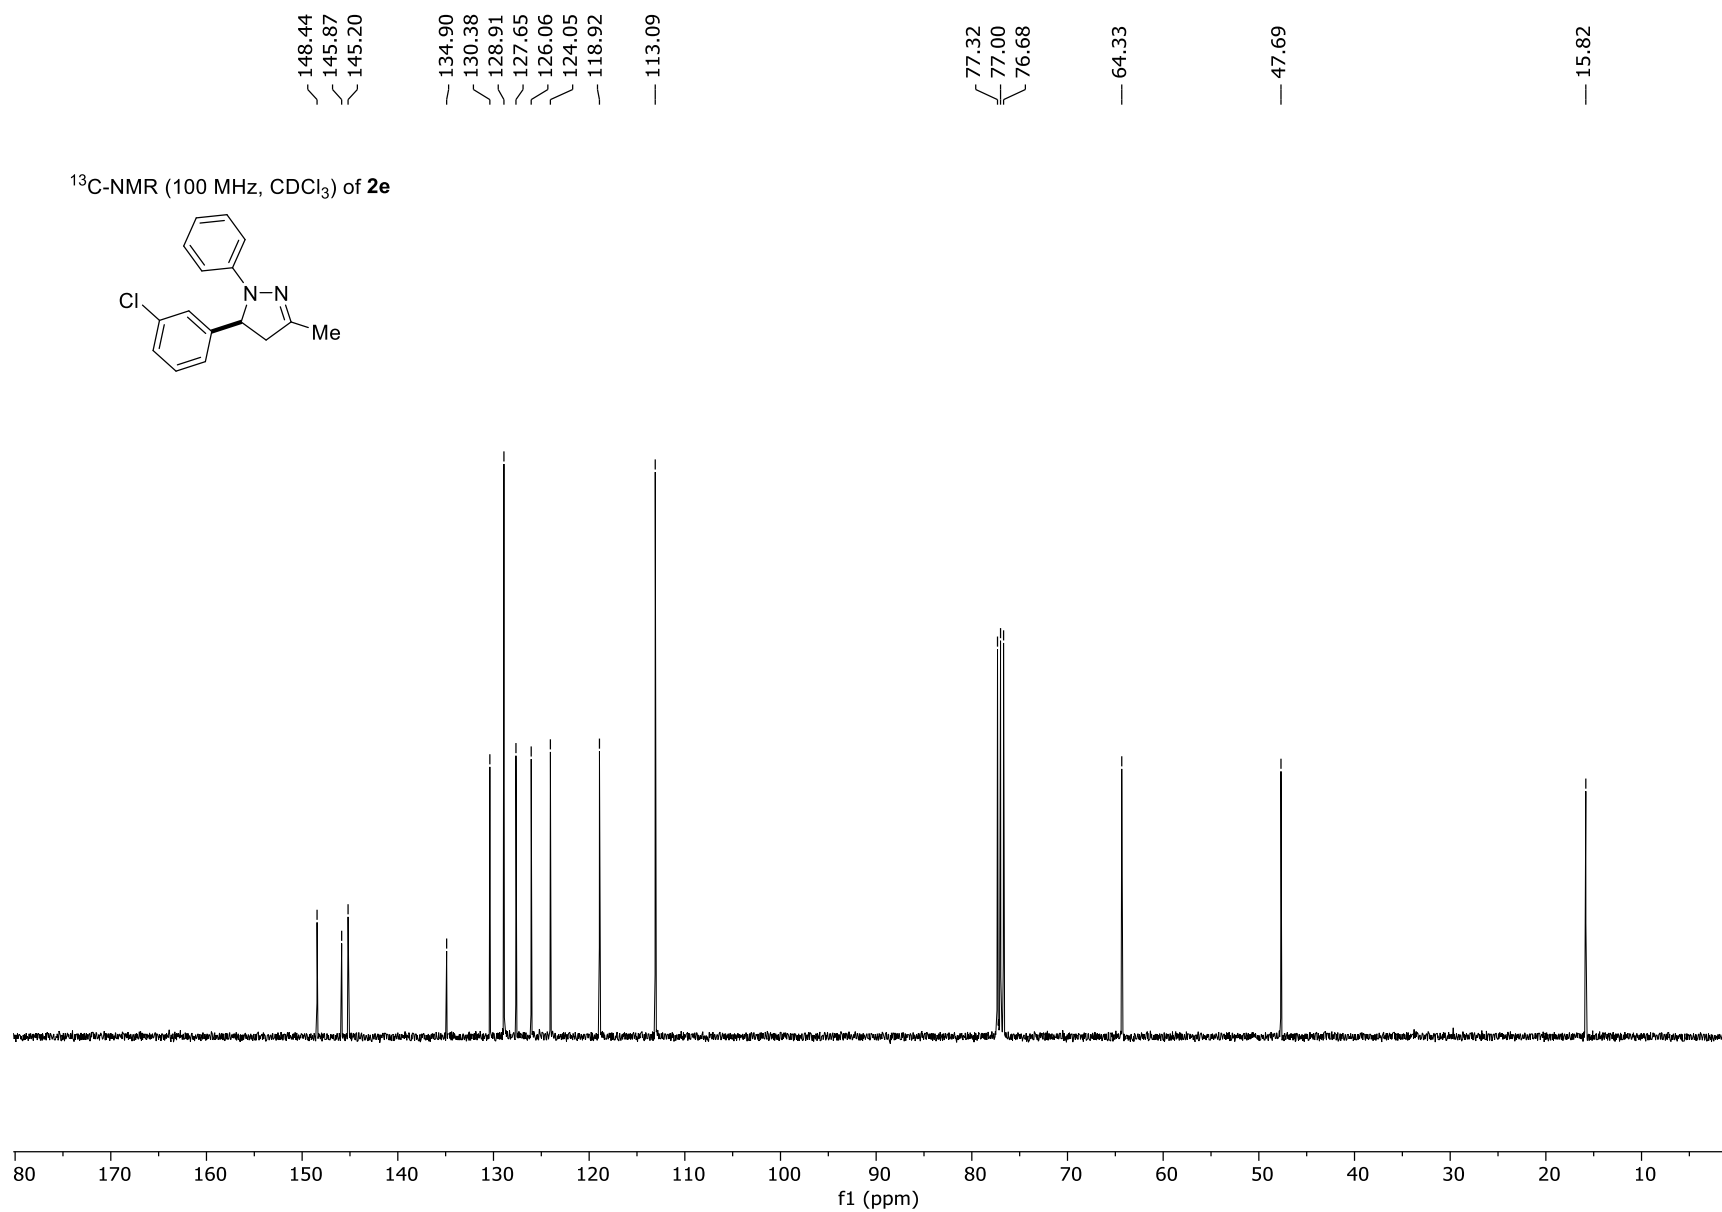

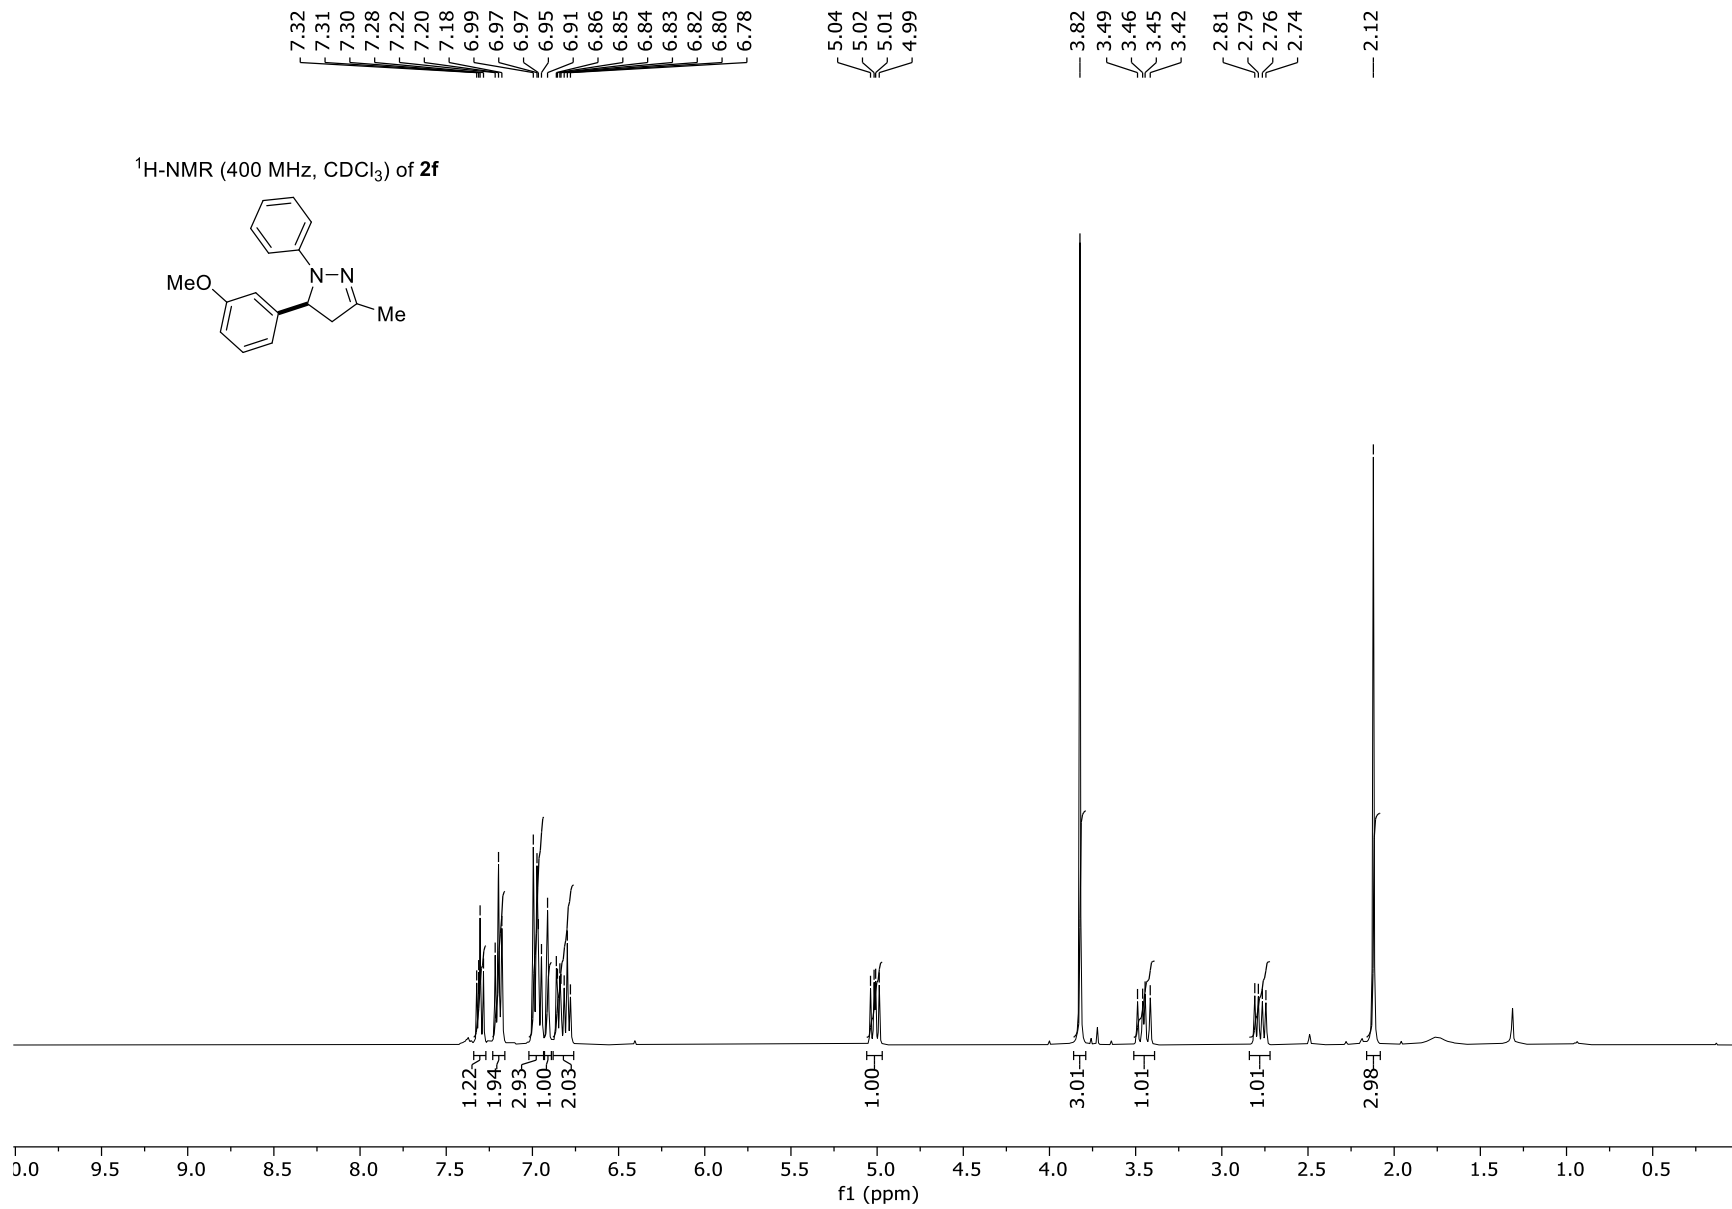

— 160.18  
 ~ 148.55  
 ~ 146.18  
 ~ 144.81  
  
 ~ 130.09  
 ~ 128.81  
  
 { 118.66  
 { 118.14  
 { 113.11  
 { 112.74  
 { 111.32  
  
 { 77.32  
 { 77.00  
 { 76.68  
  
 — 64.89  
  
 — 55.21  
  
 — 47.80  
  
 — 15.88

<sup>13</sup>C-NMR (100 MHz, CDCl<sub>3</sub>) of **2f**

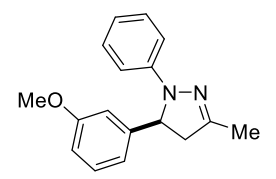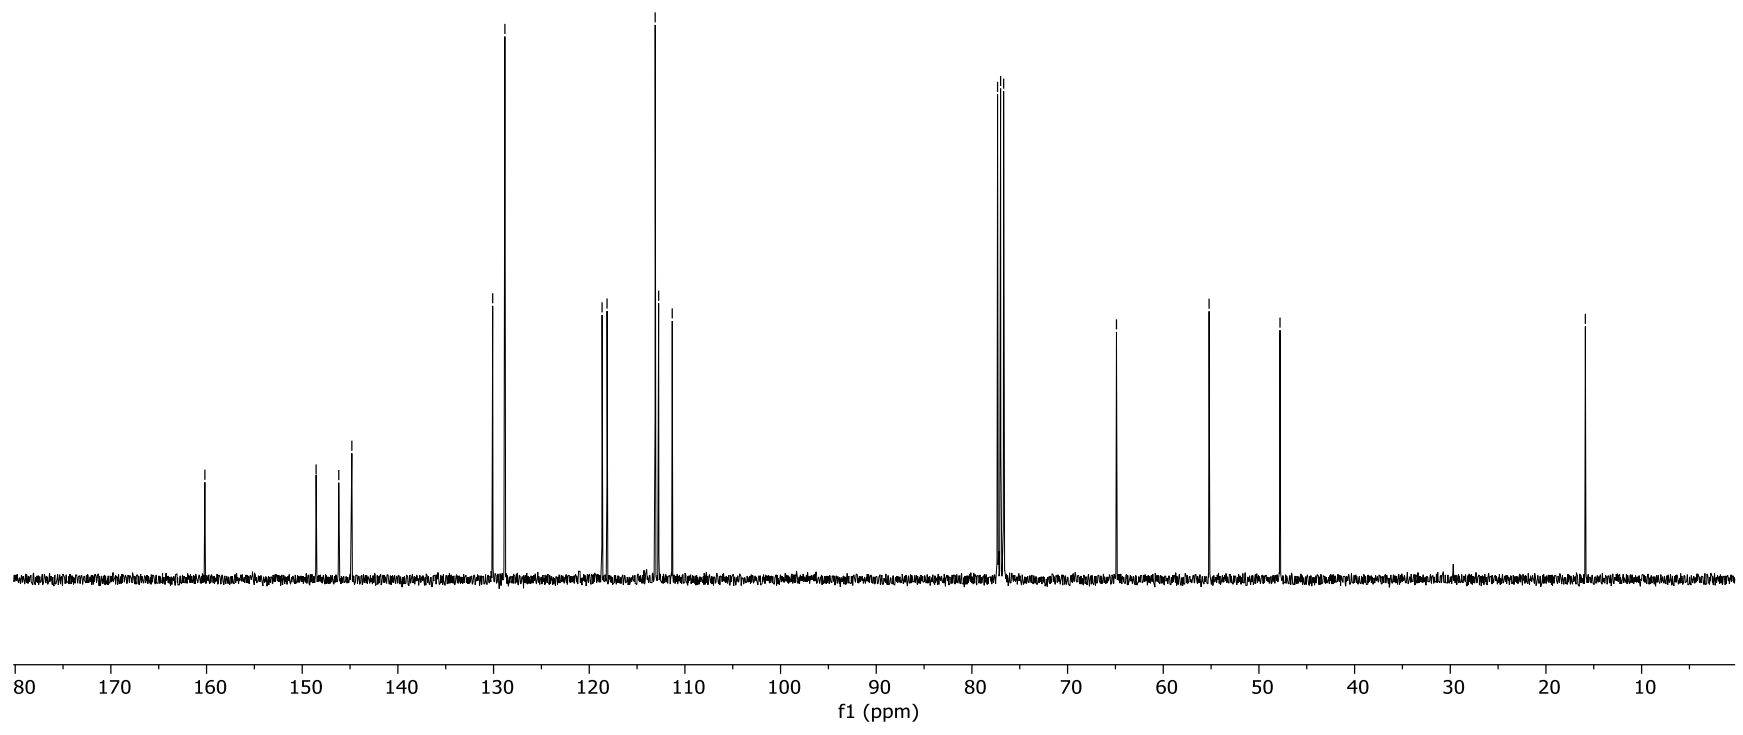

<sup>1</sup>H-NMR (400 MHz, CDCl<sub>3</sub>) of **2g**

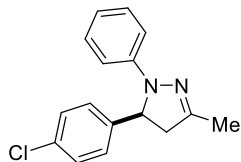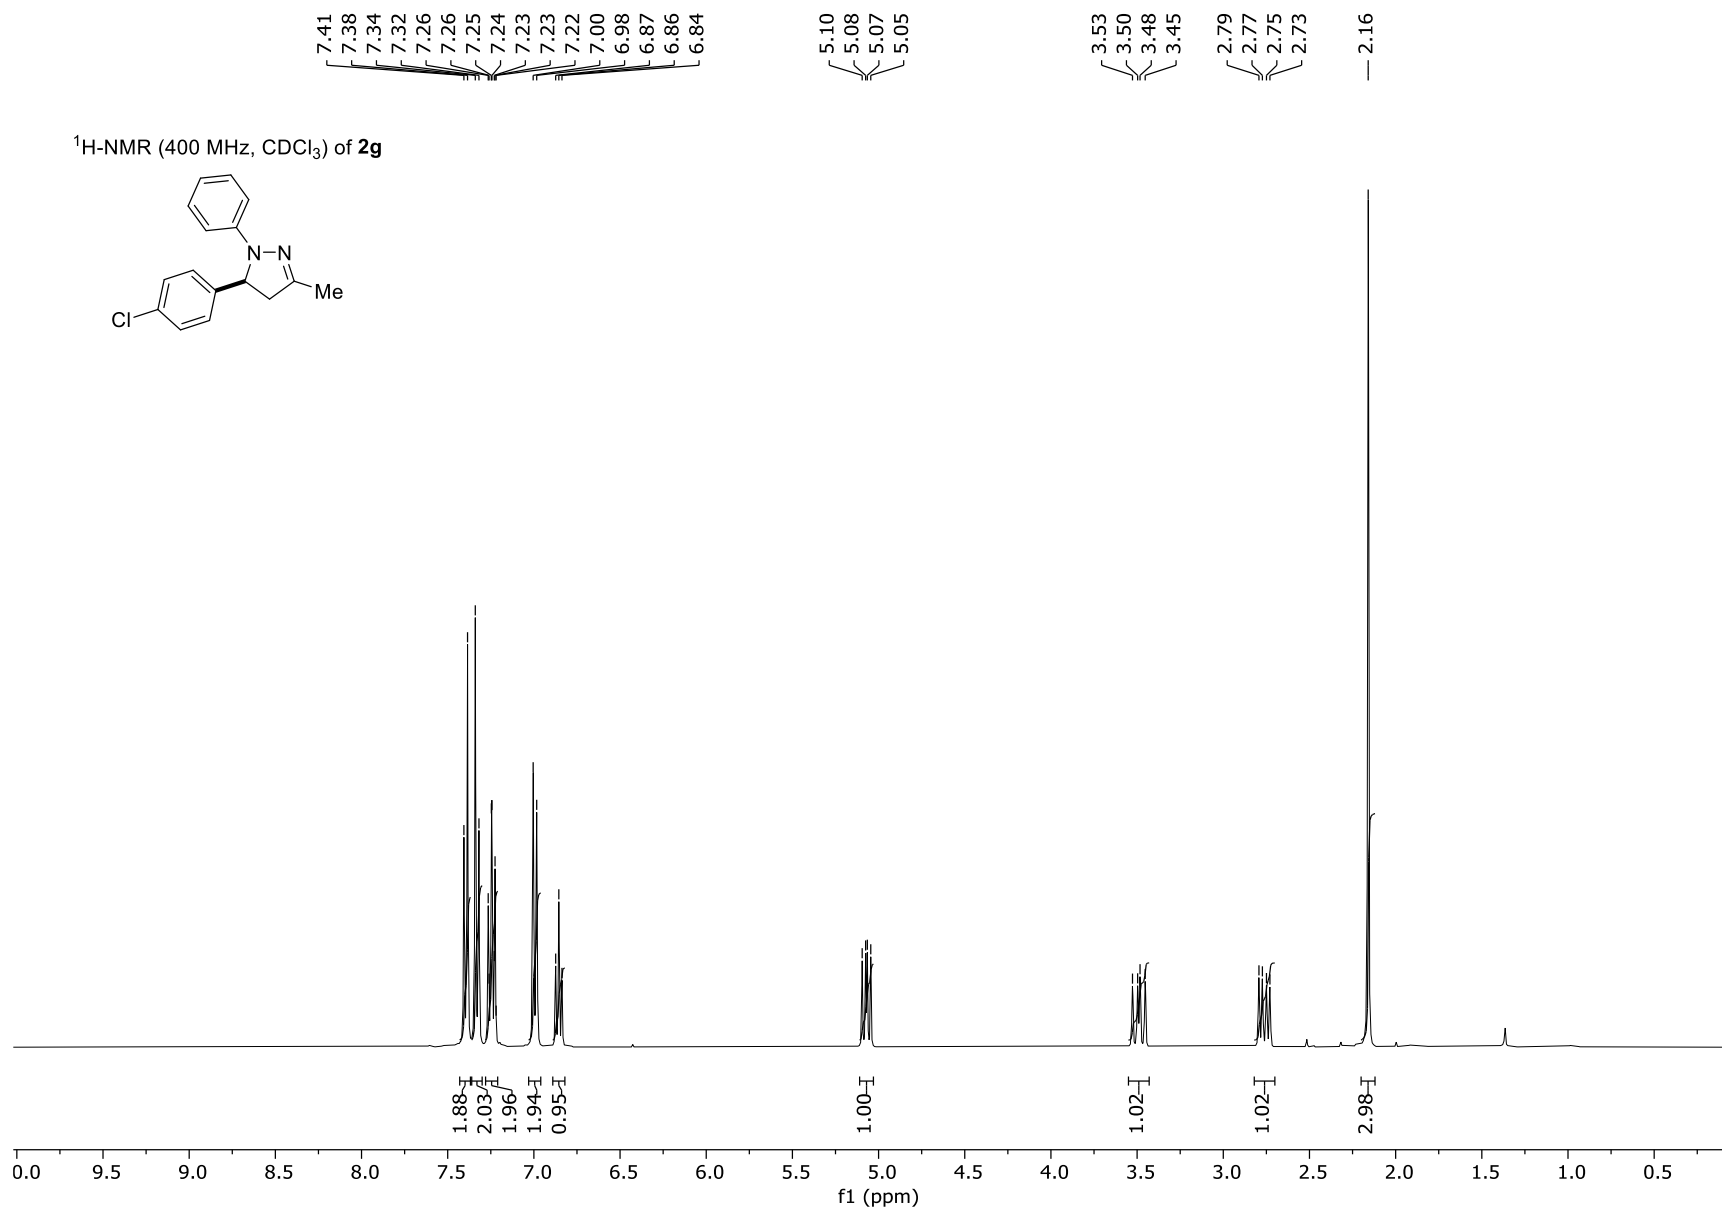

<sup>13</sup>C-NMR (100 MHz, CDCl<sub>3</sub>) of **2g**

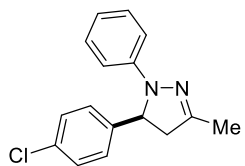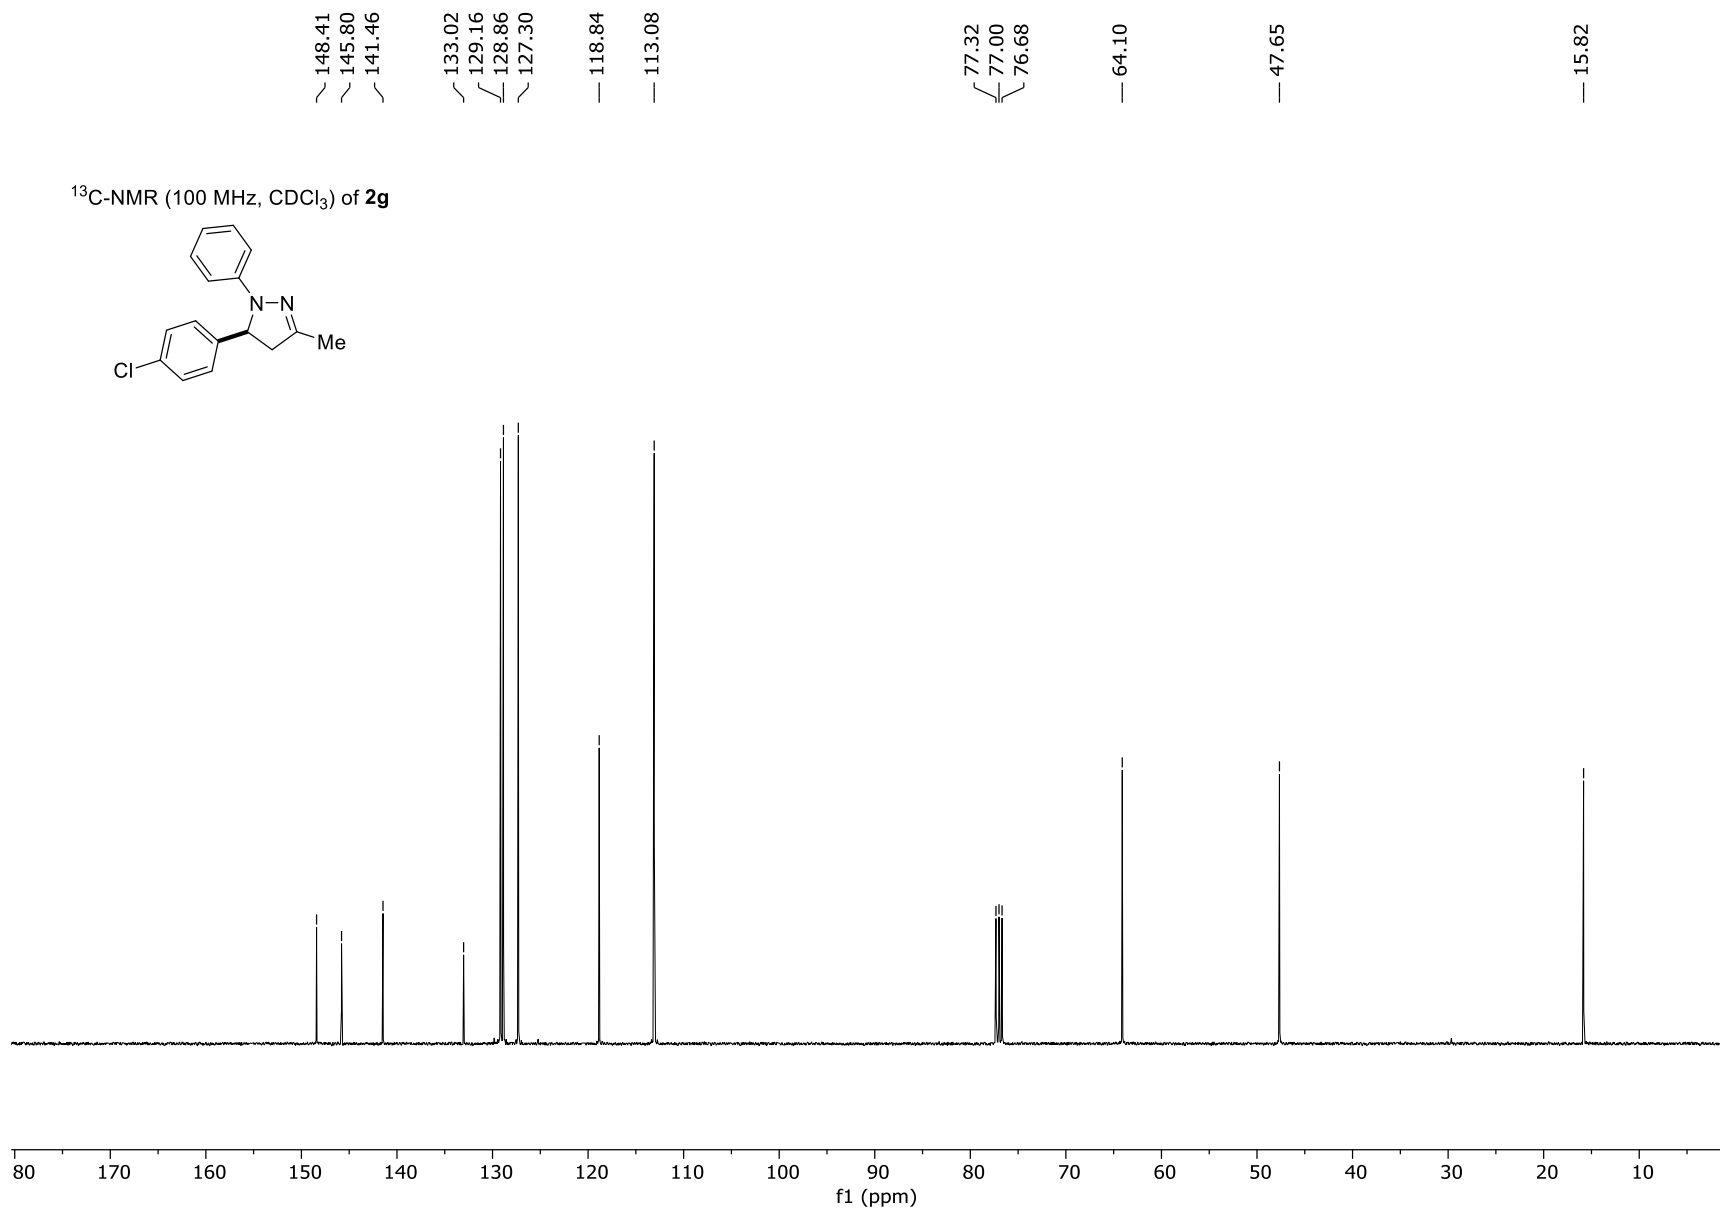



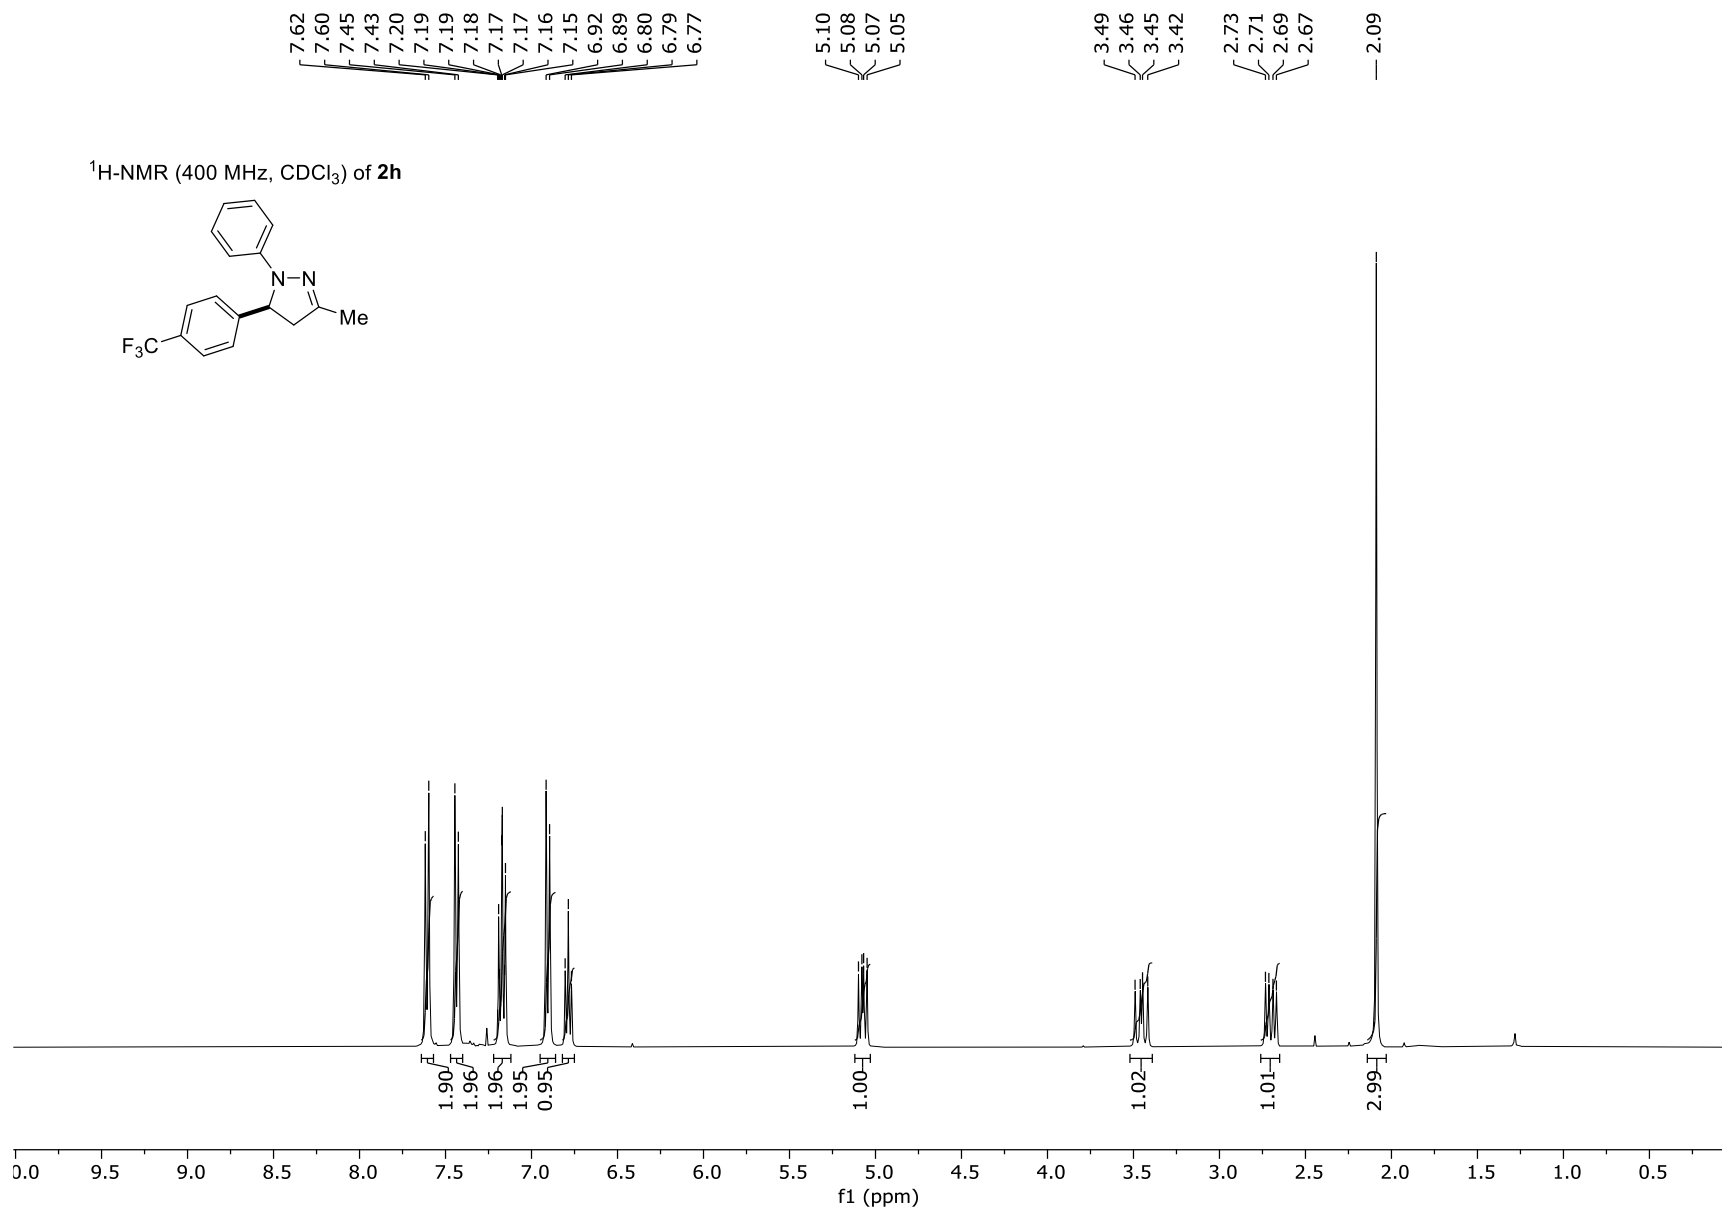

<sup>13</sup>C-NMR (100 MHz, CDCl<sub>3</sub>) of 2h

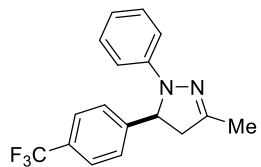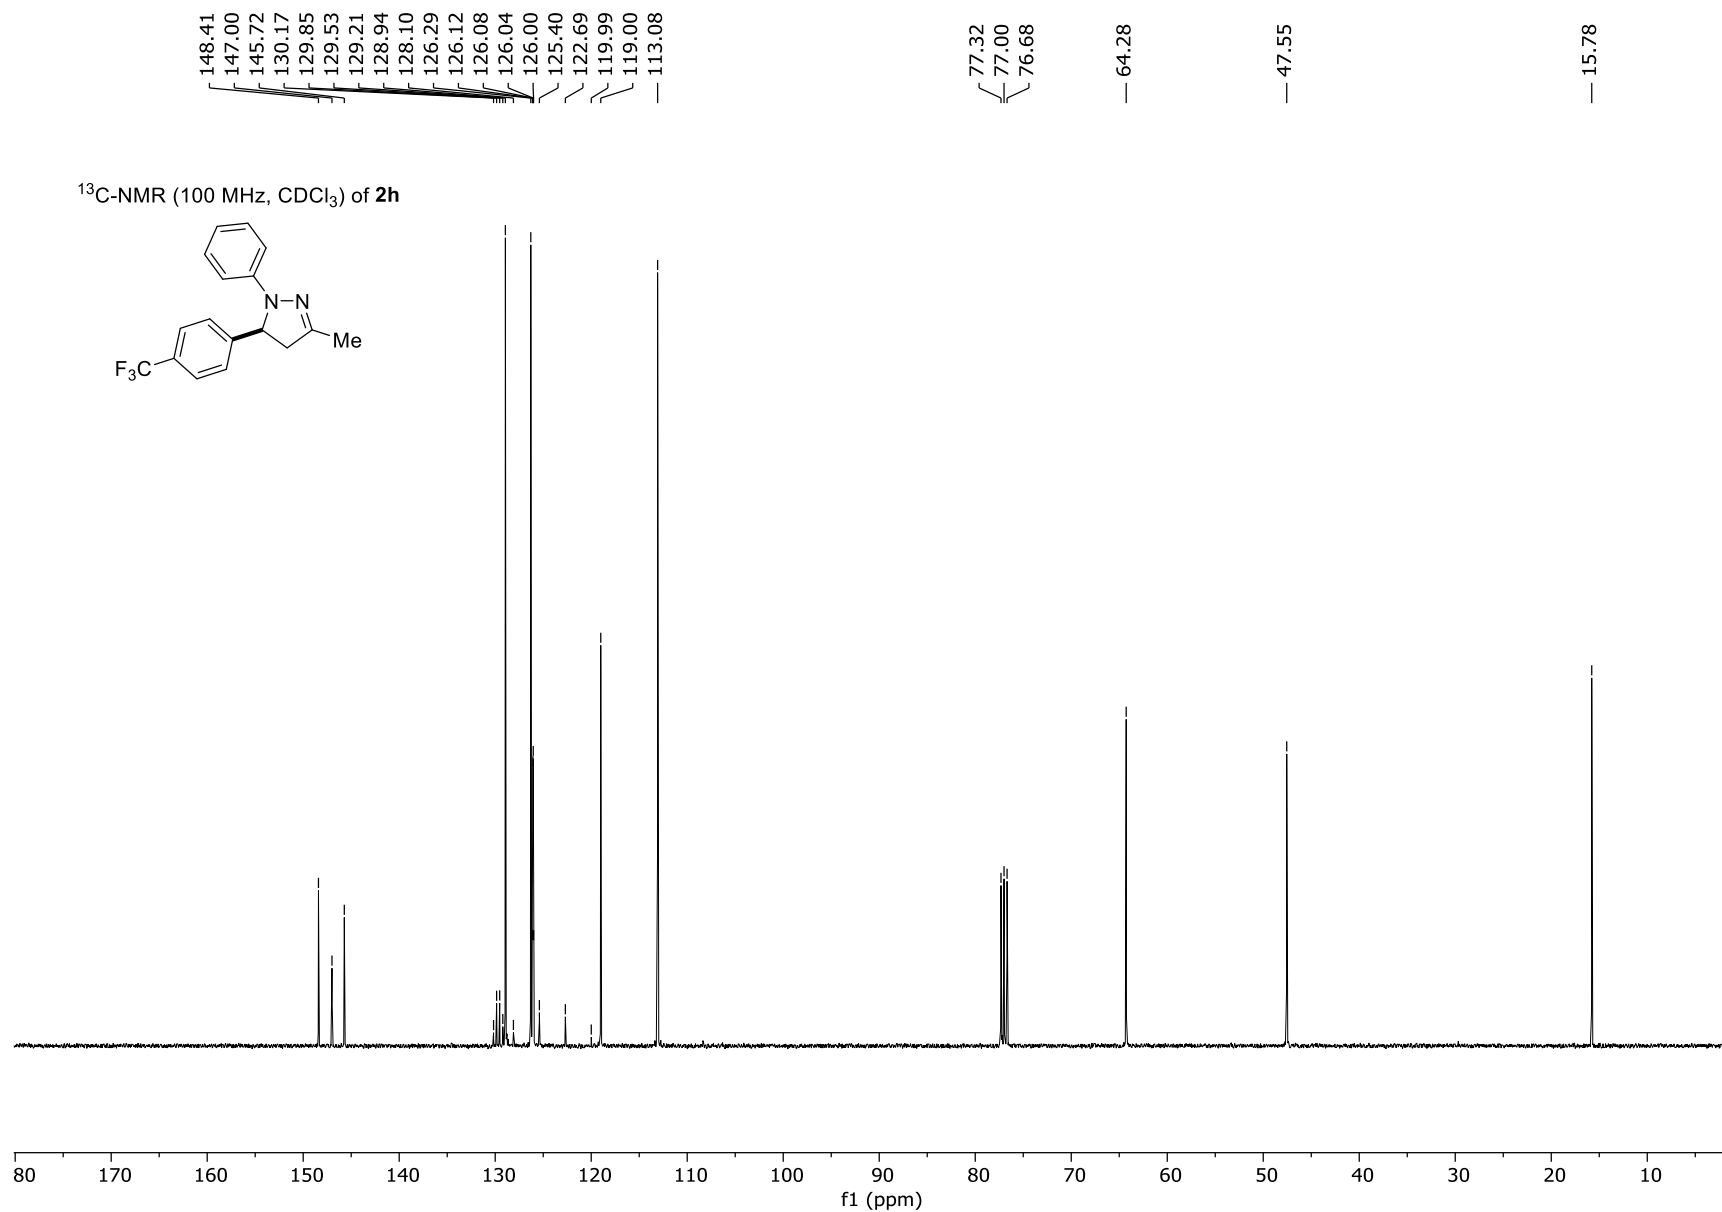

<sup>19</sup>F-NMR (377 MHz, CDCl<sub>3</sub>) of **2h**

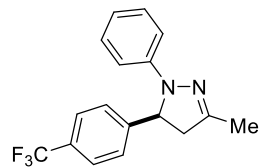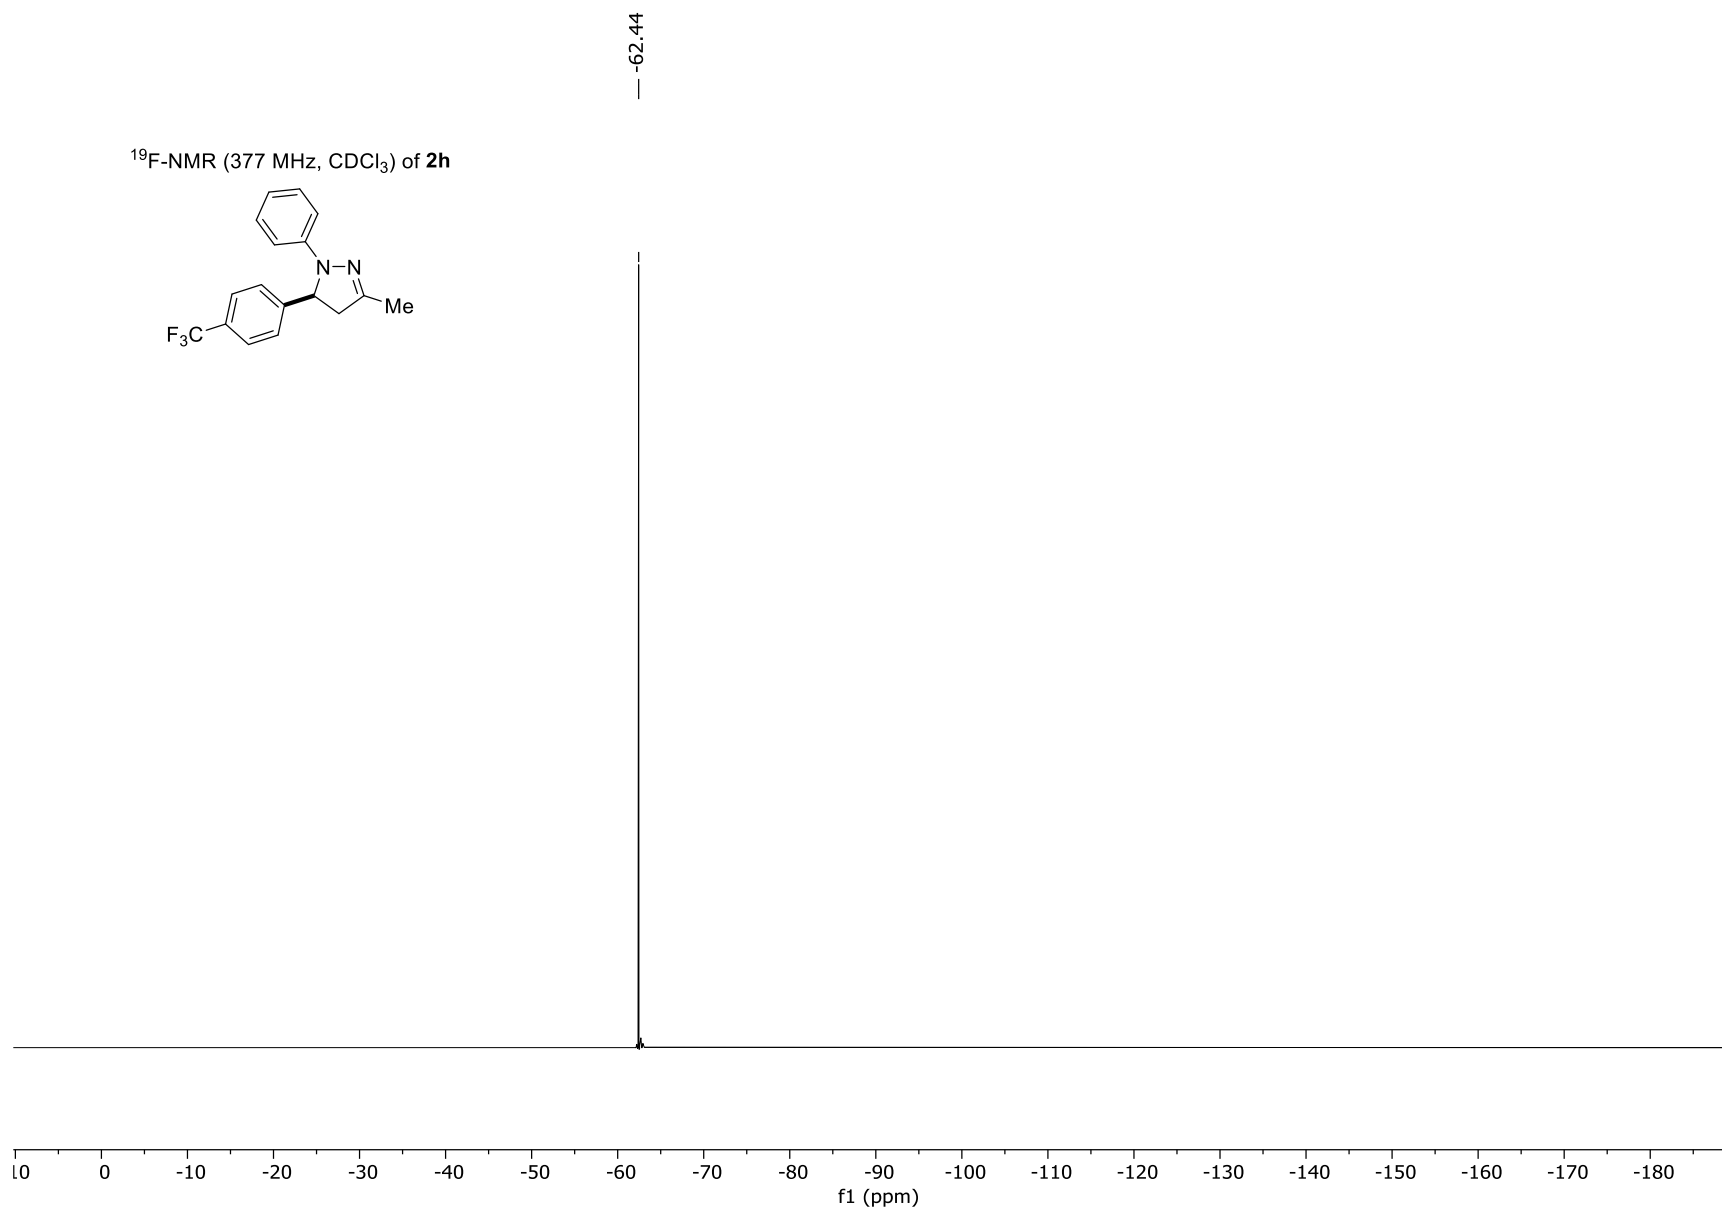

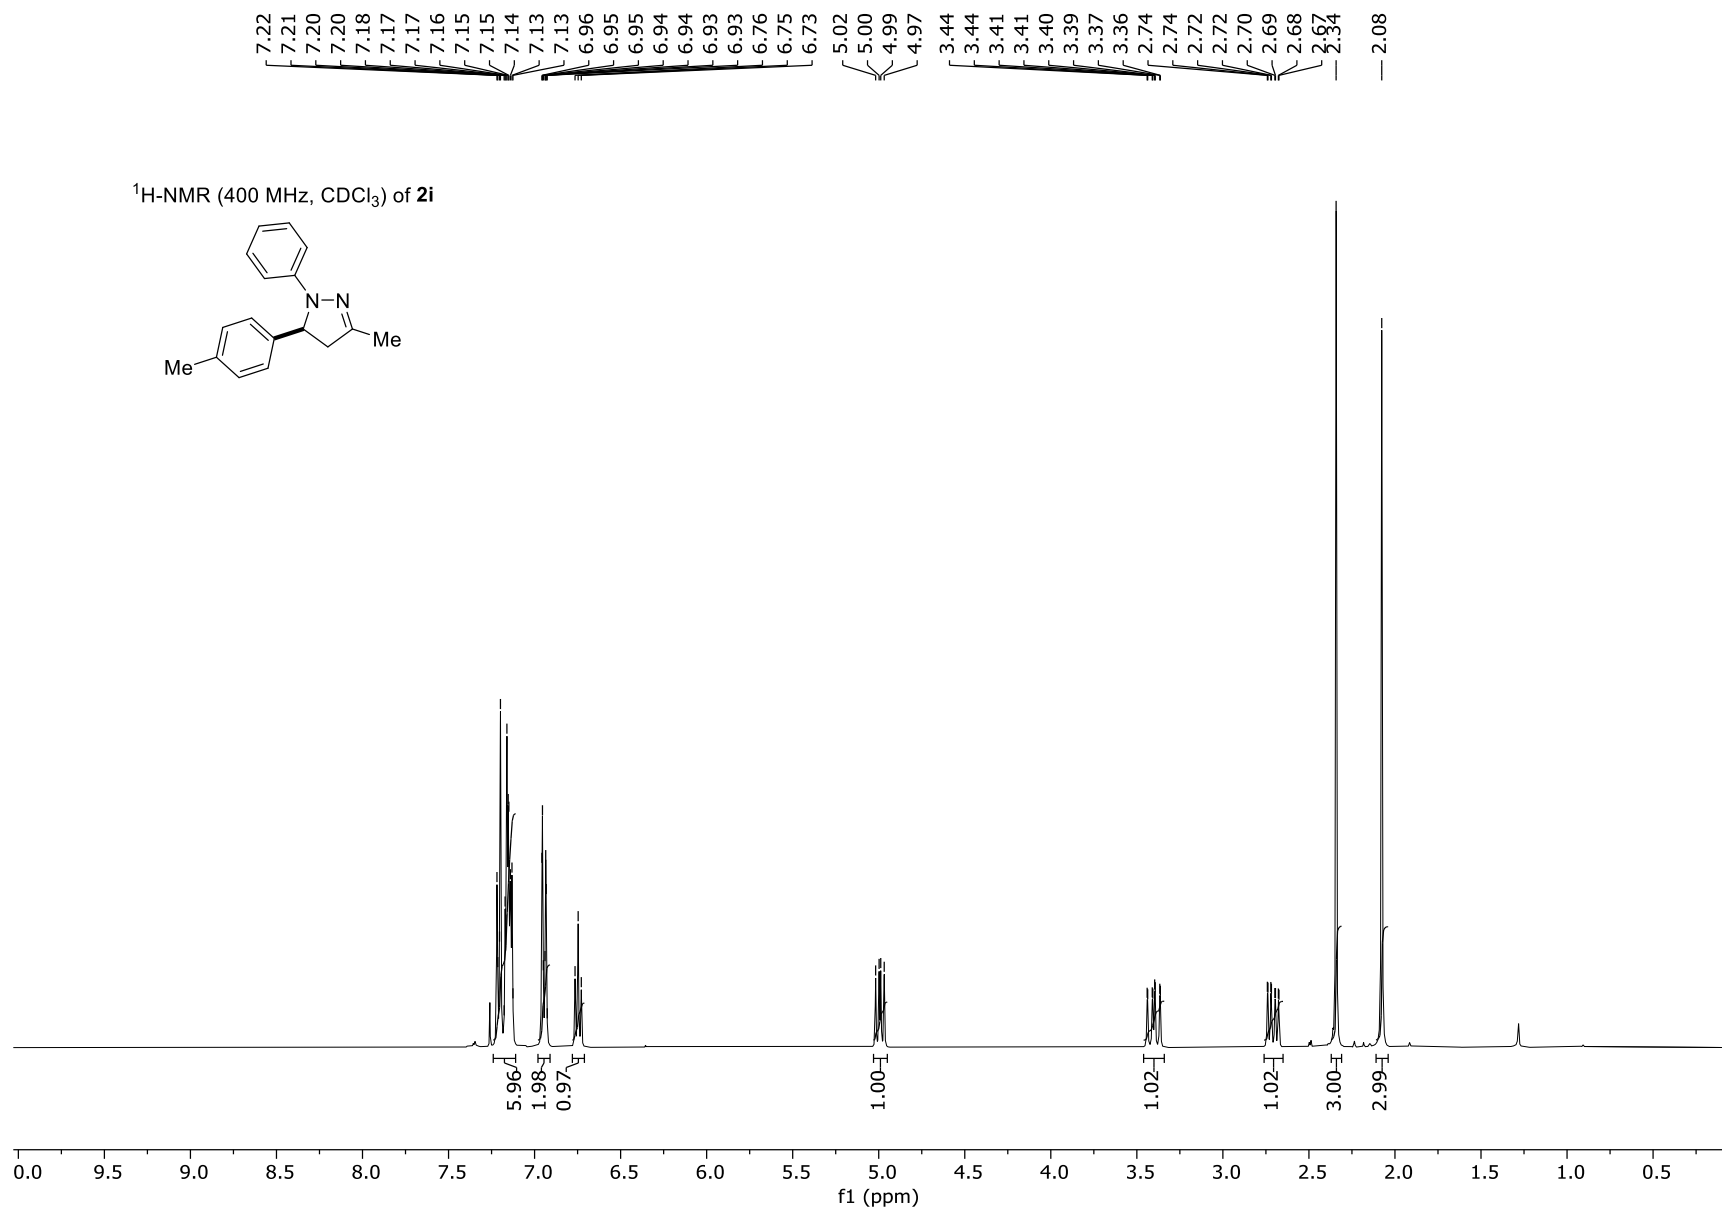

<sup>13</sup>C-NMR (100 MHz, CDCl<sub>3</sub>) of 2i

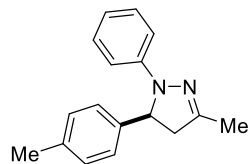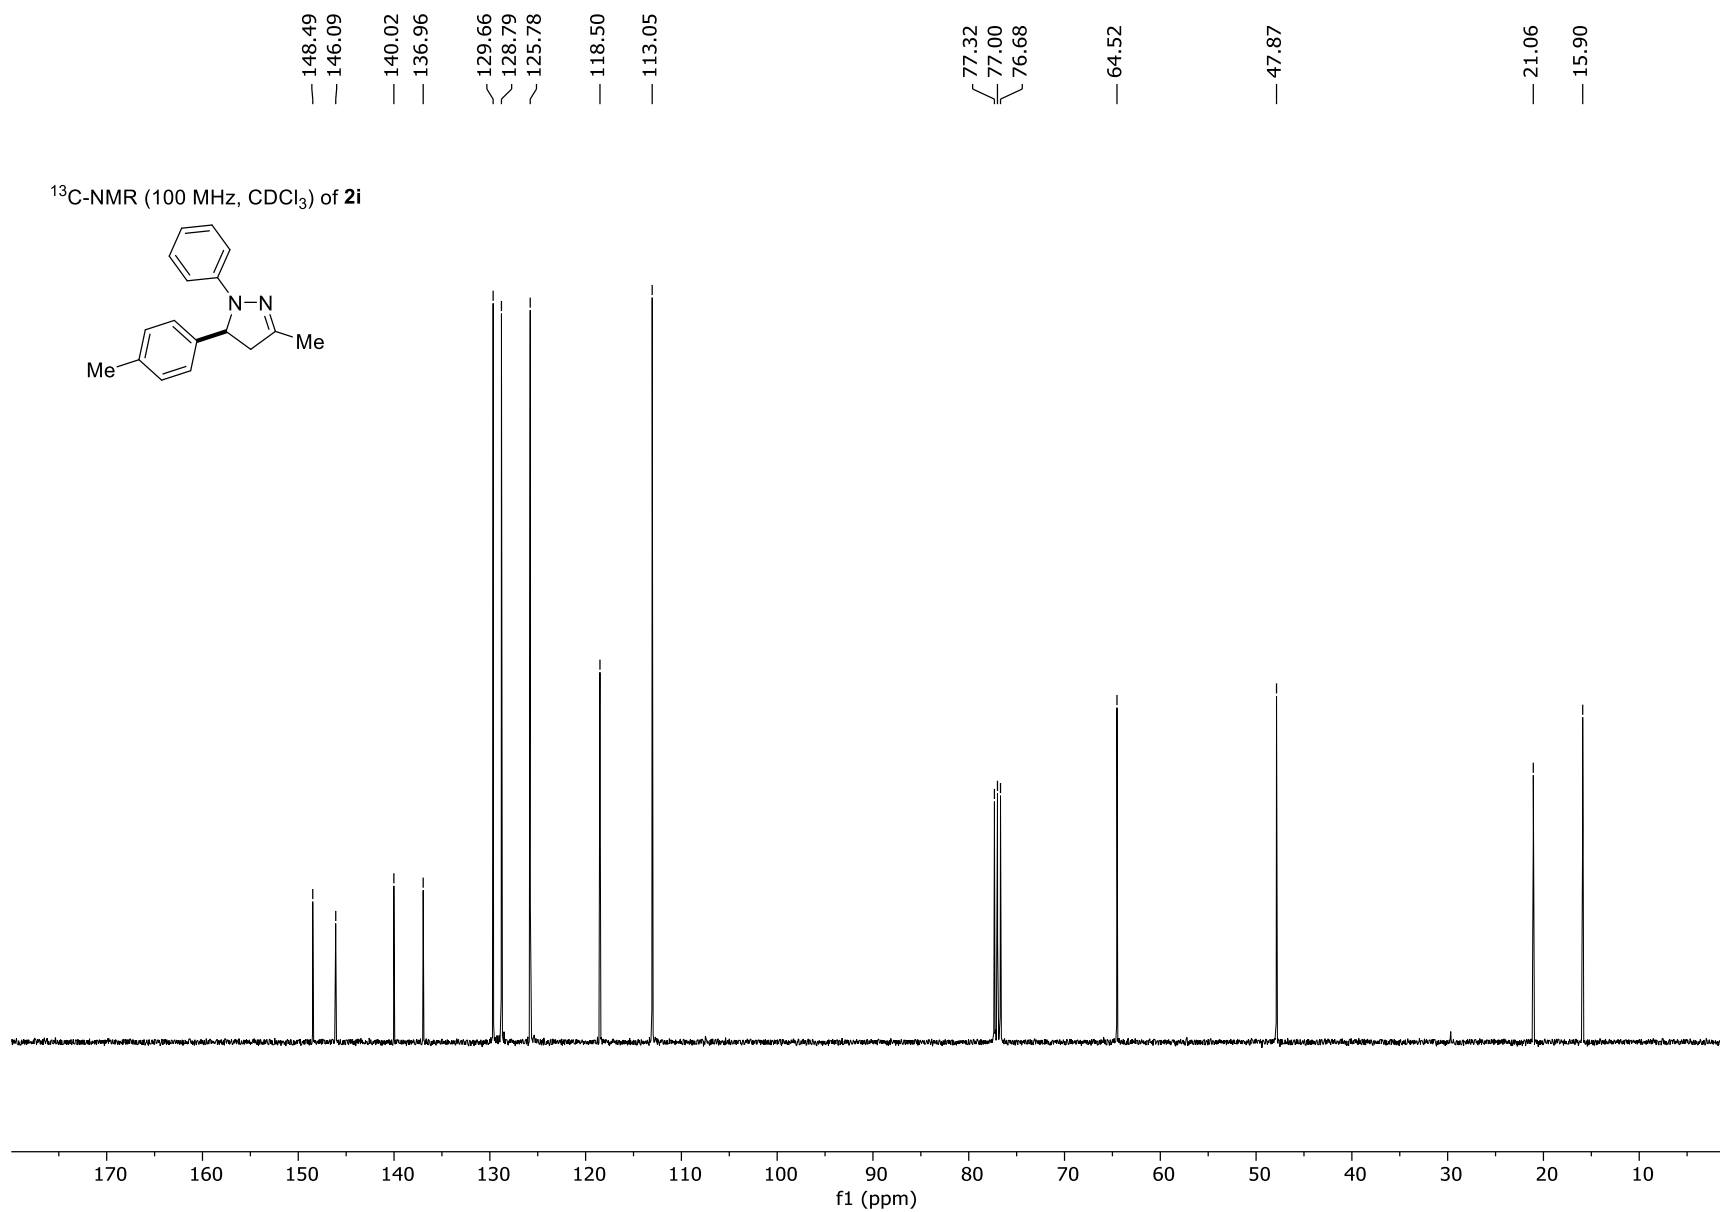

<sup>1</sup>H-NMR (600 MHz, CDCl<sub>3</sub>) of 2j

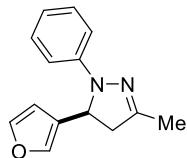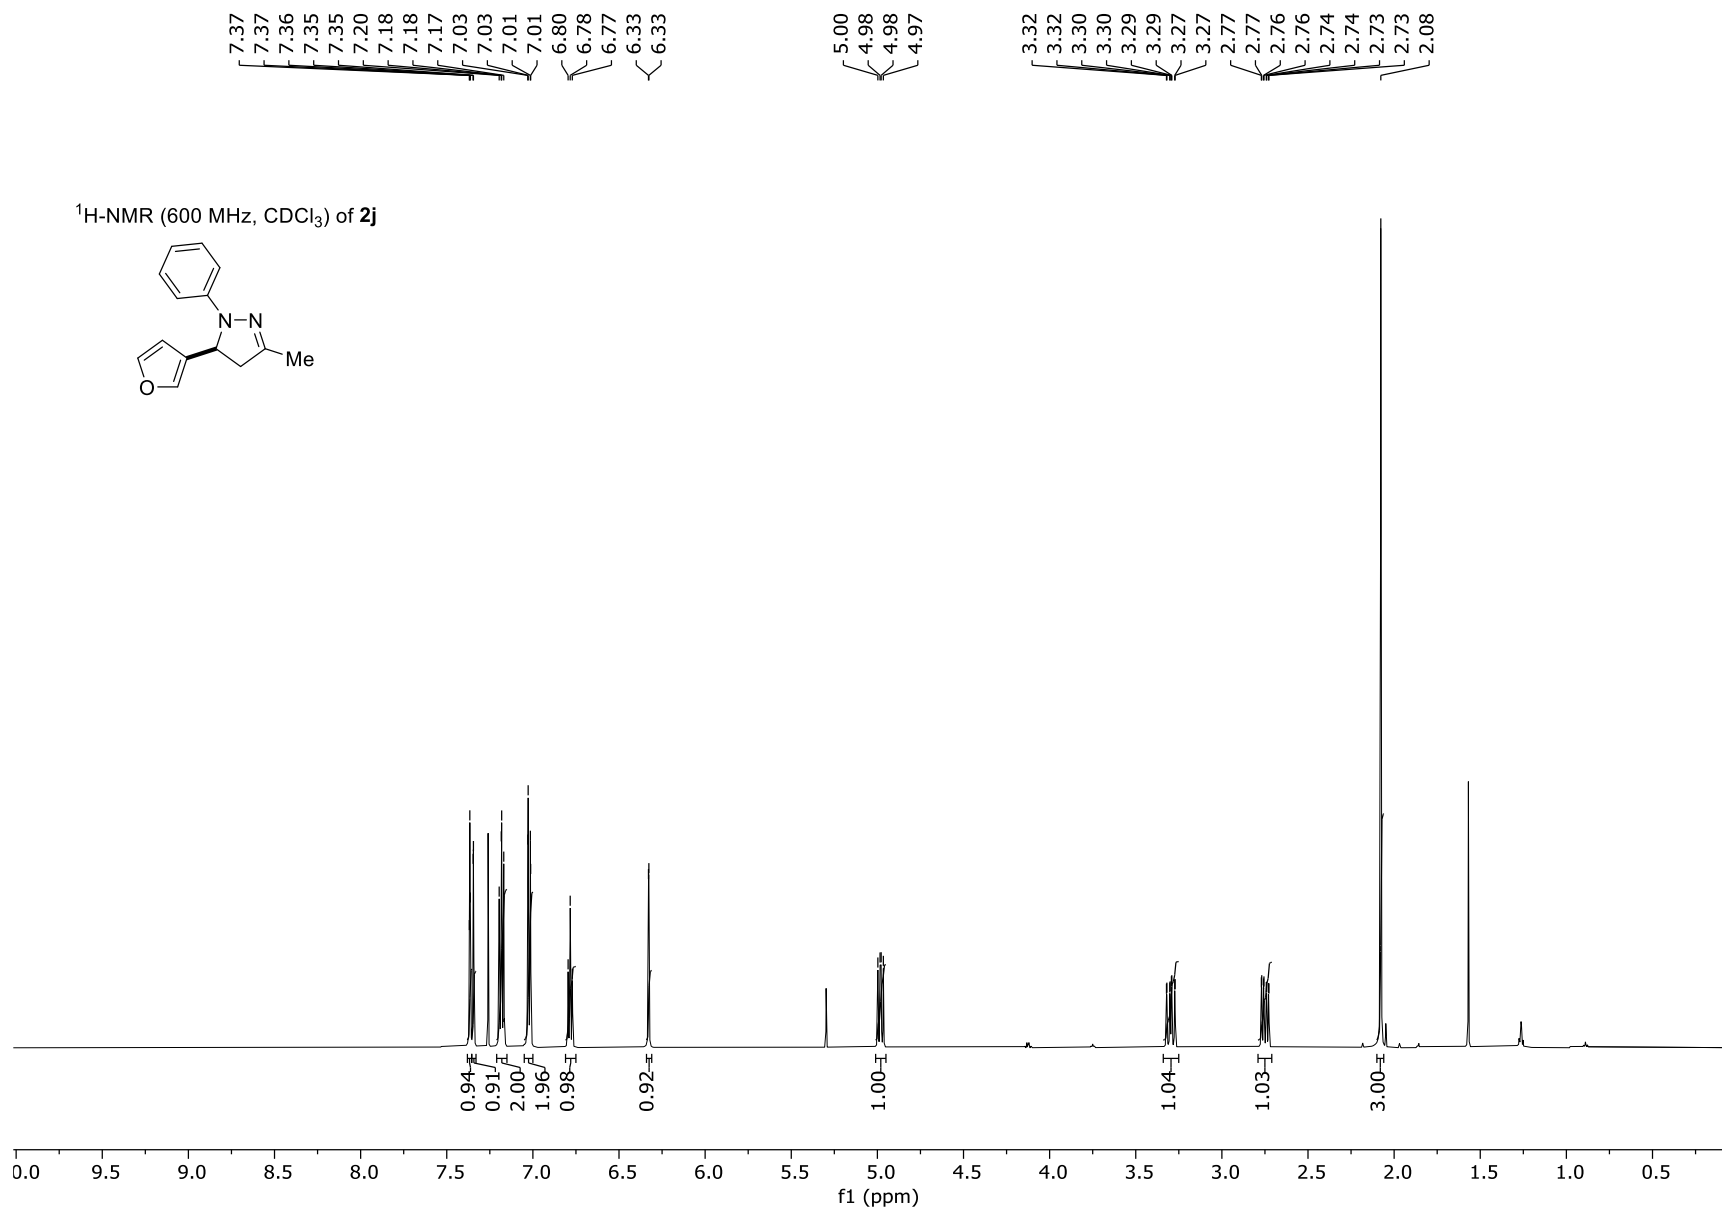

<sup>13</sup>C-NMR (150 MHz, CDCl<sub>3</sub>) of **2j**

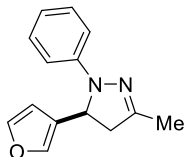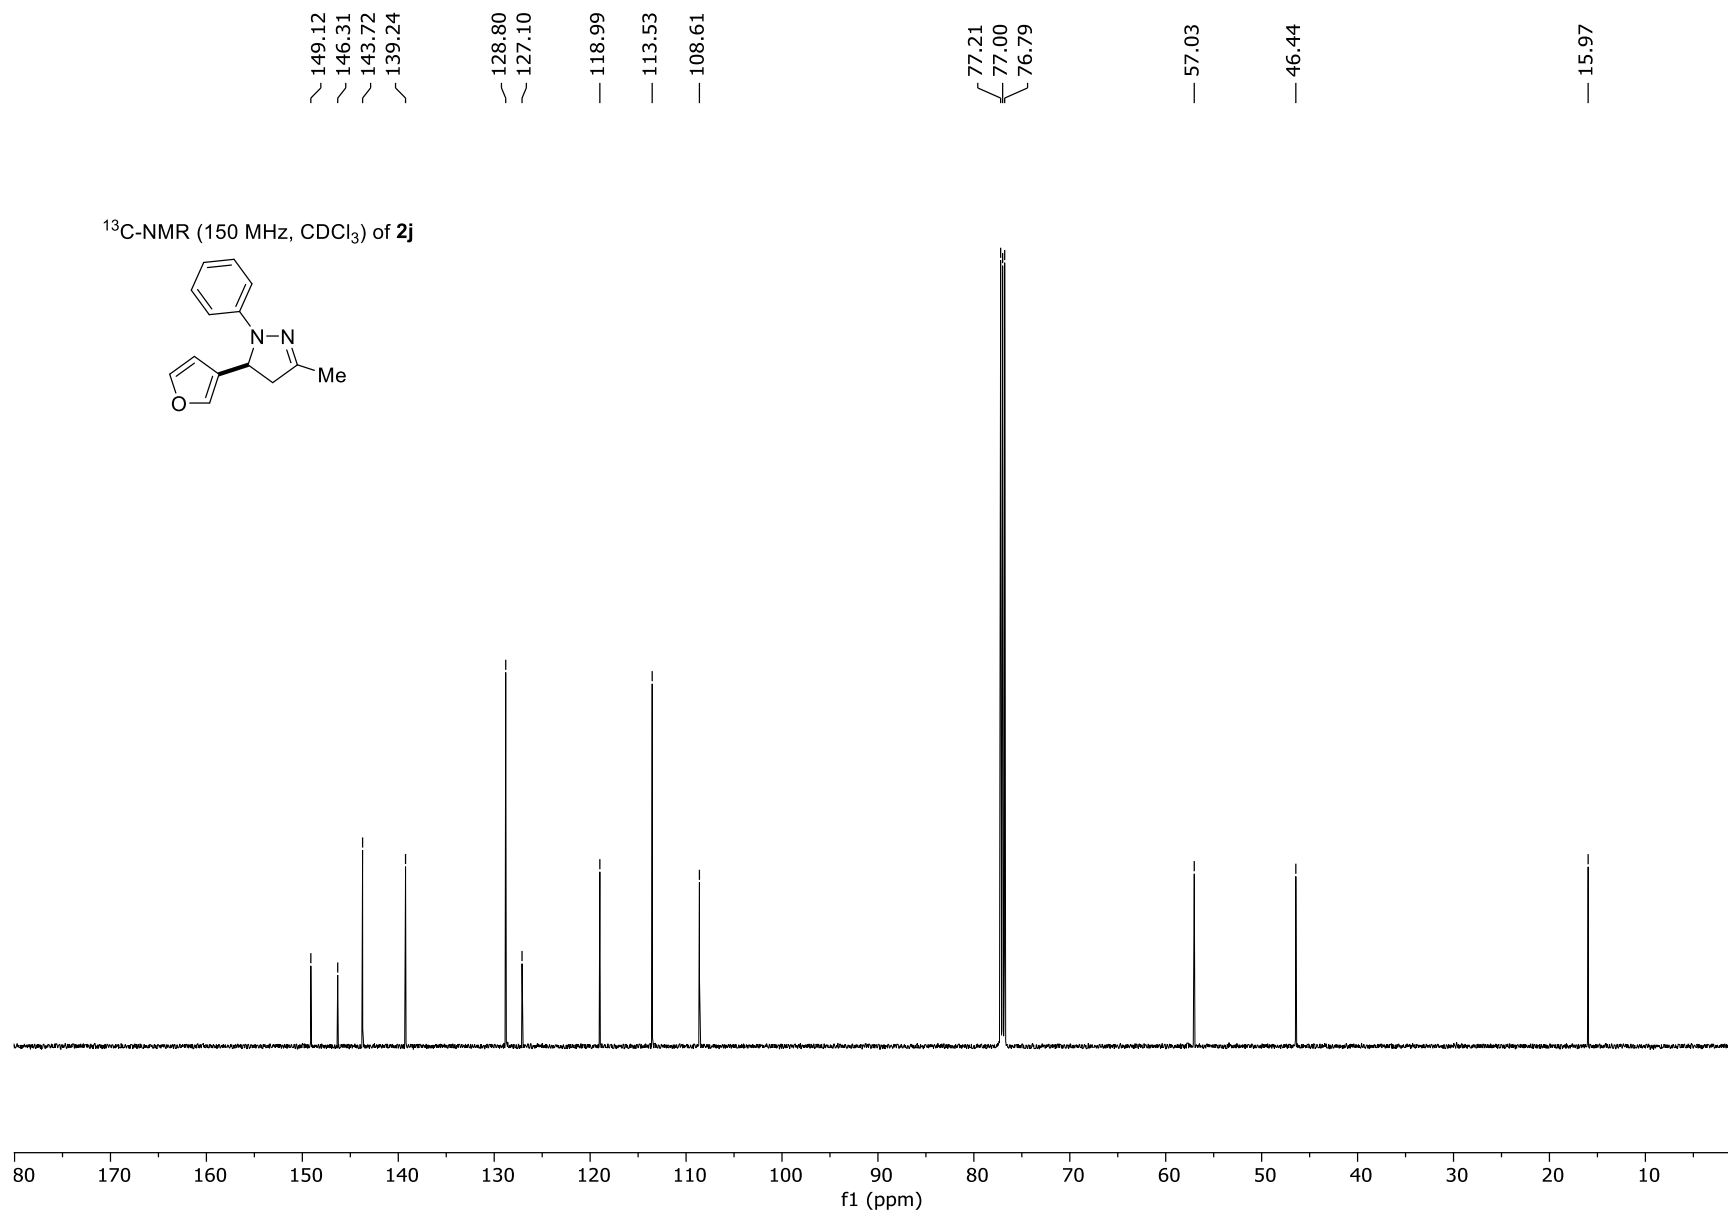

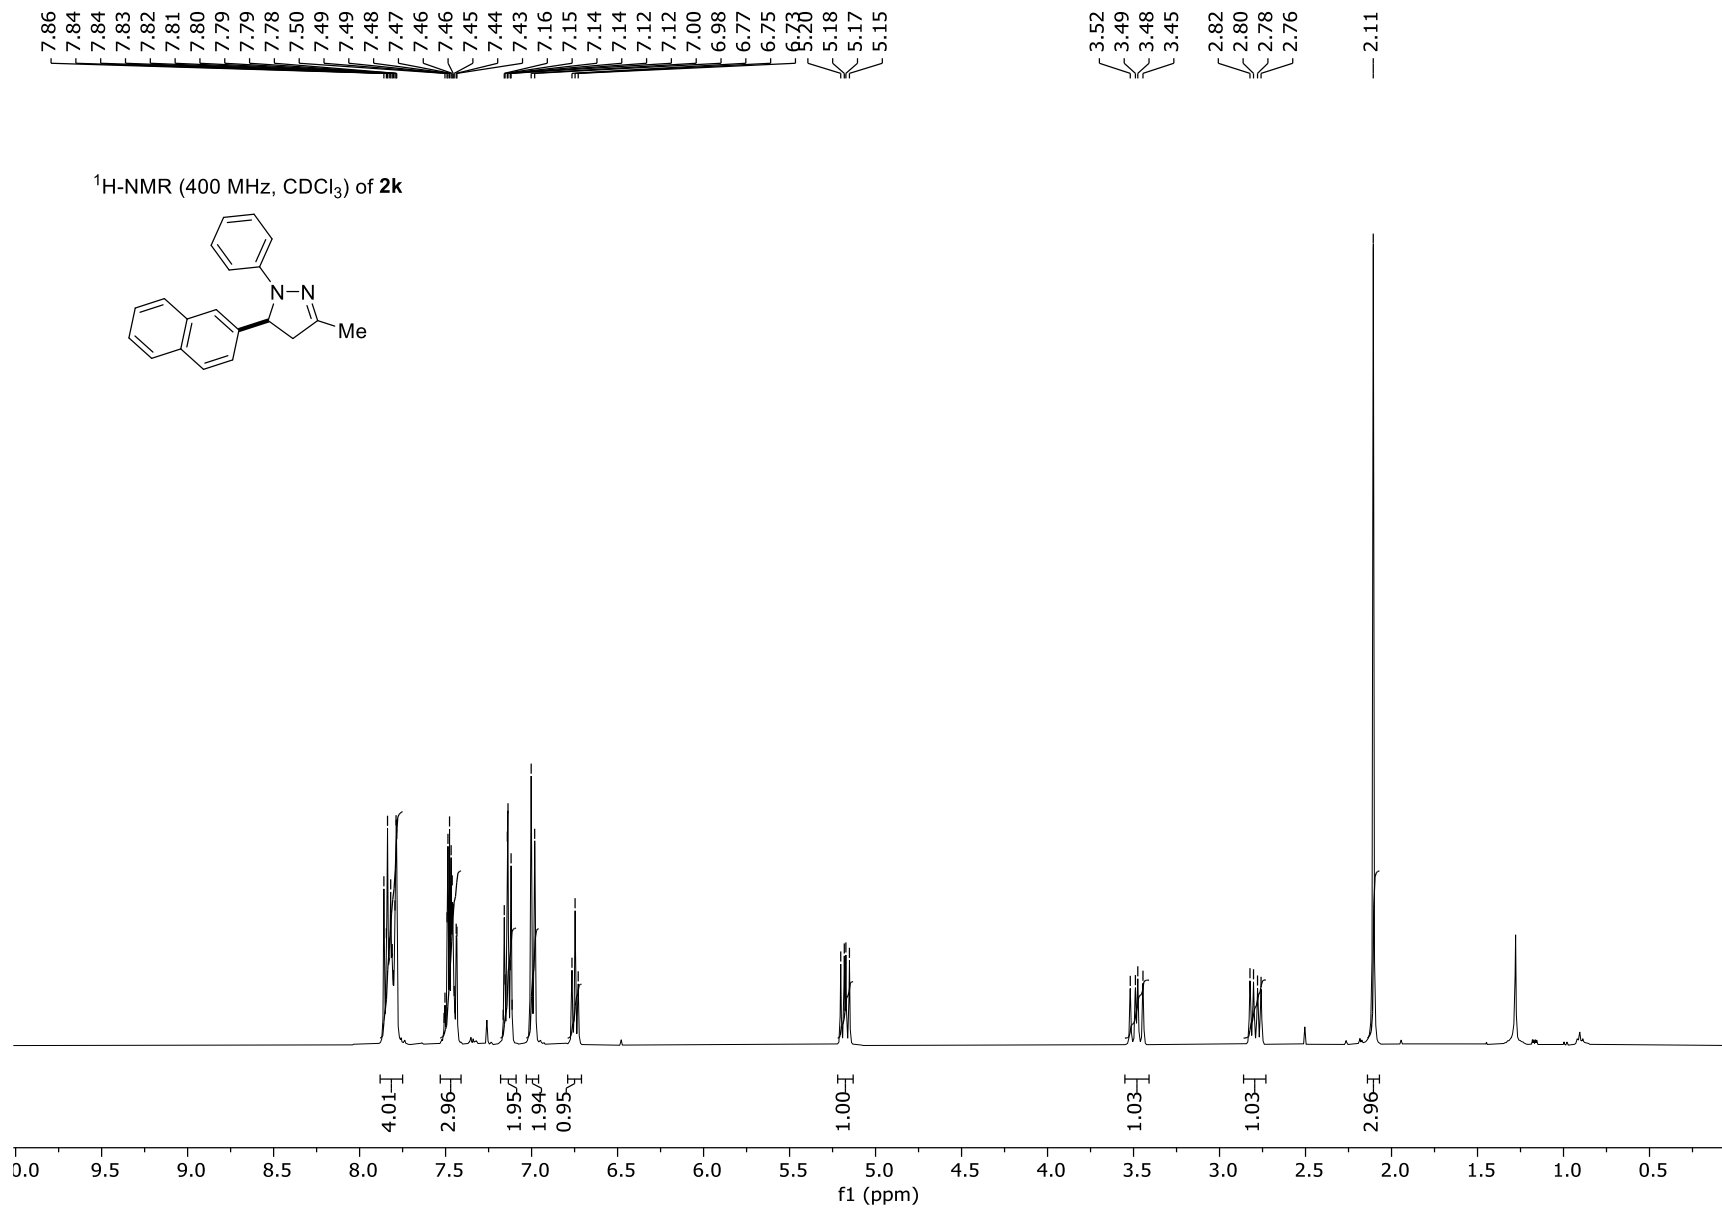



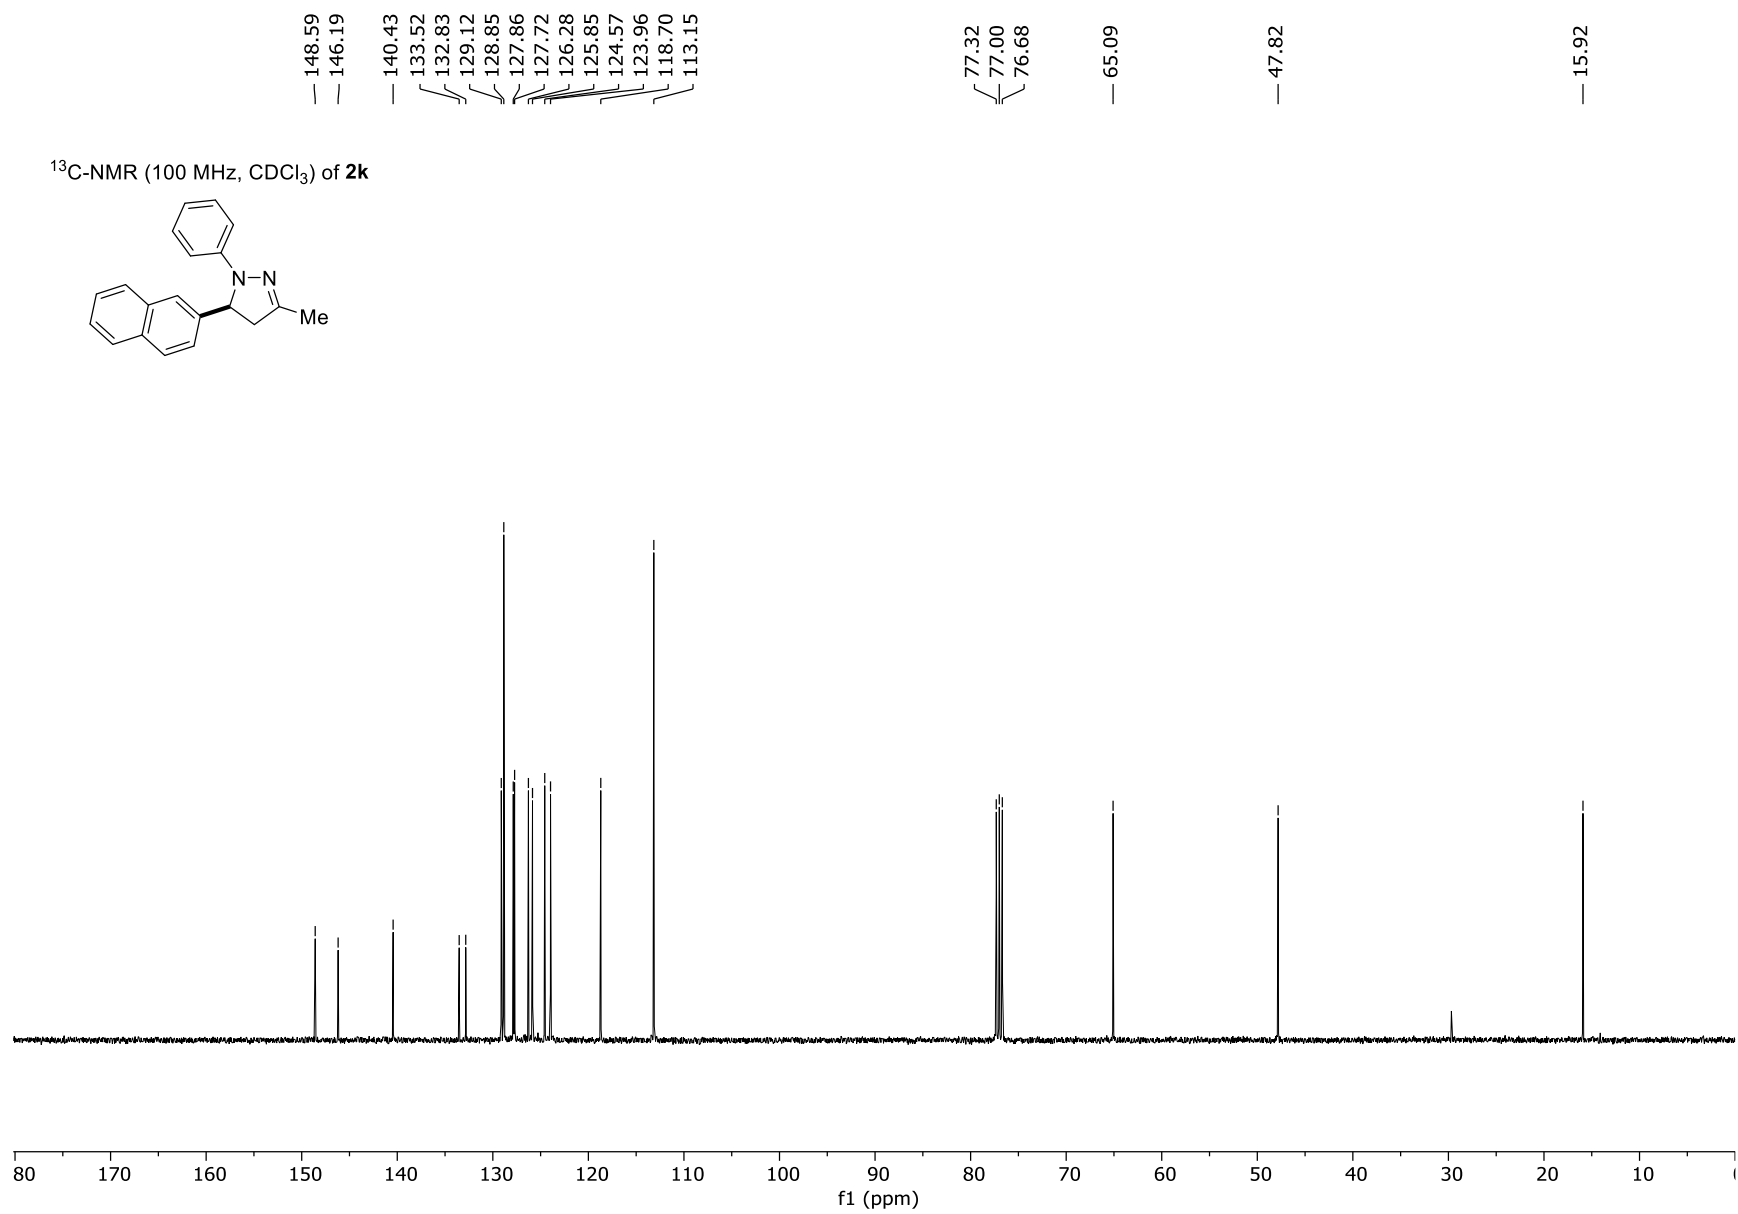

7.37  
7.37  
7.36  
7.36  
7.35  
7.35  
7.34  
7.31  
7.30  
7.29  
7.29  
7.28  
7.28  
7.27  
6.91  
6.91  
6.90  
6.90  
6.89  
6.89  
6.76  
6.76  
6.75  
6.75  
6.74  
6.74

4.92  
4.90  
4.90  
4.88

3.73  
3.41  
3.39  
3.38  
3.36  
2.77  
2.75  
2.74  
2.72

2.08

<sup>1</sup>H-NMR (600 MHz, CDCl<sub>3</sub>) of 2I

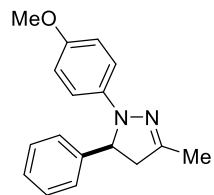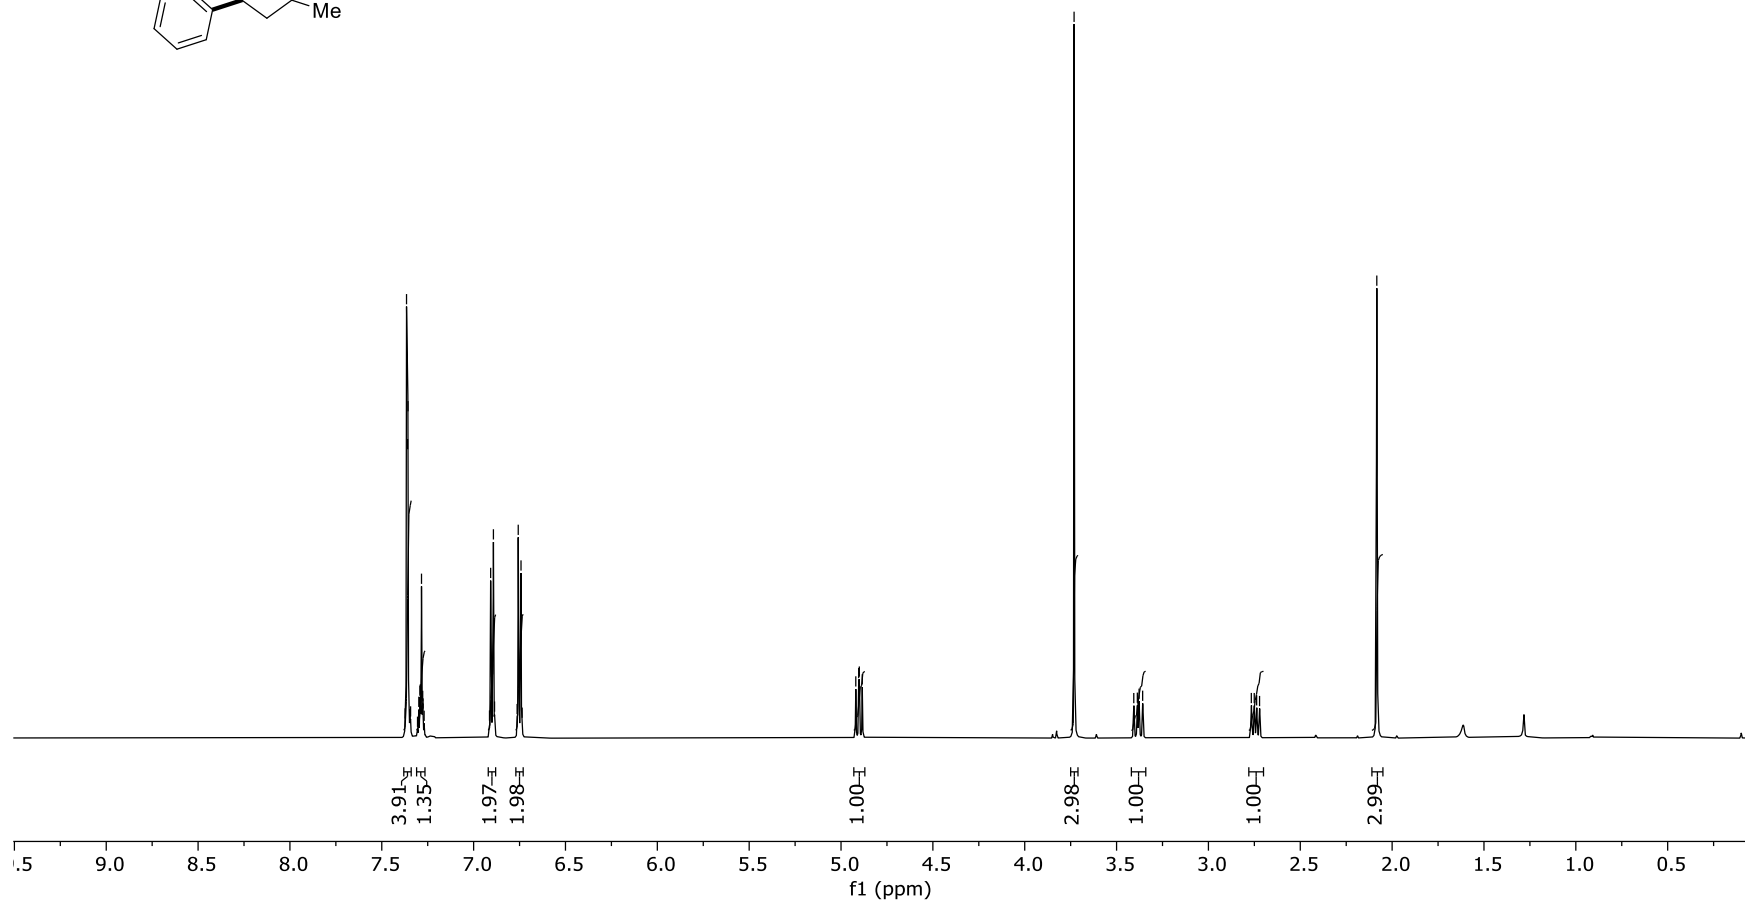

— 153.10  
— 148.36  
— 143.05  
— 141.12

— 128.95  
— 127.35  
— 126.17

— 114.92  
— 114.31

— 77.21  
— 77.00  
— 76.79

— 66.37

— 55.59

— 47.98

— 15.90

<sup>1</sup>H-NMR (150 MHz, CDCl<sub>3</sub>) of **21**

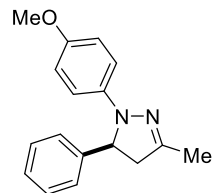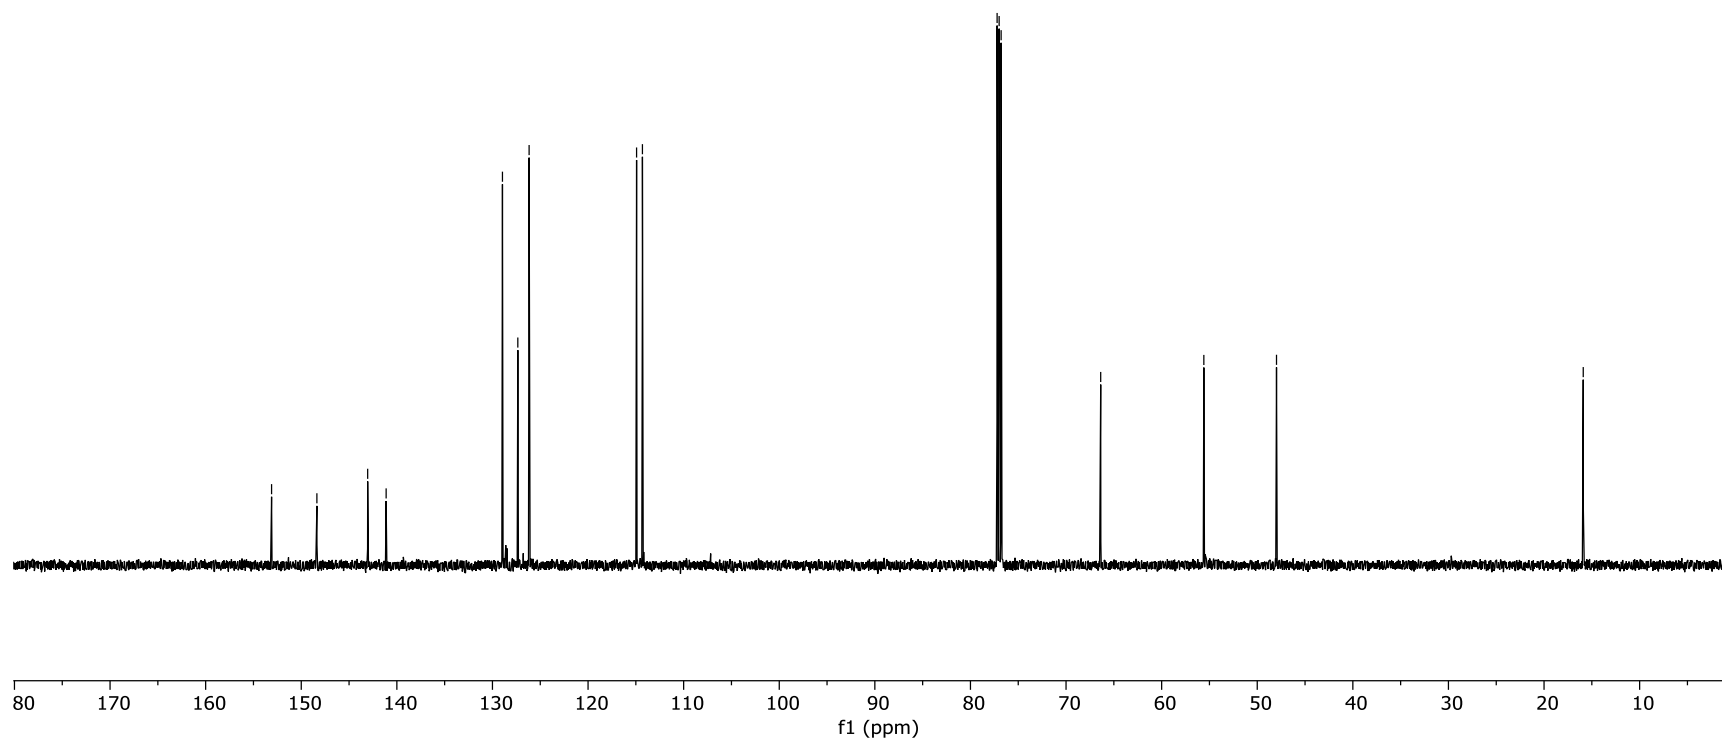

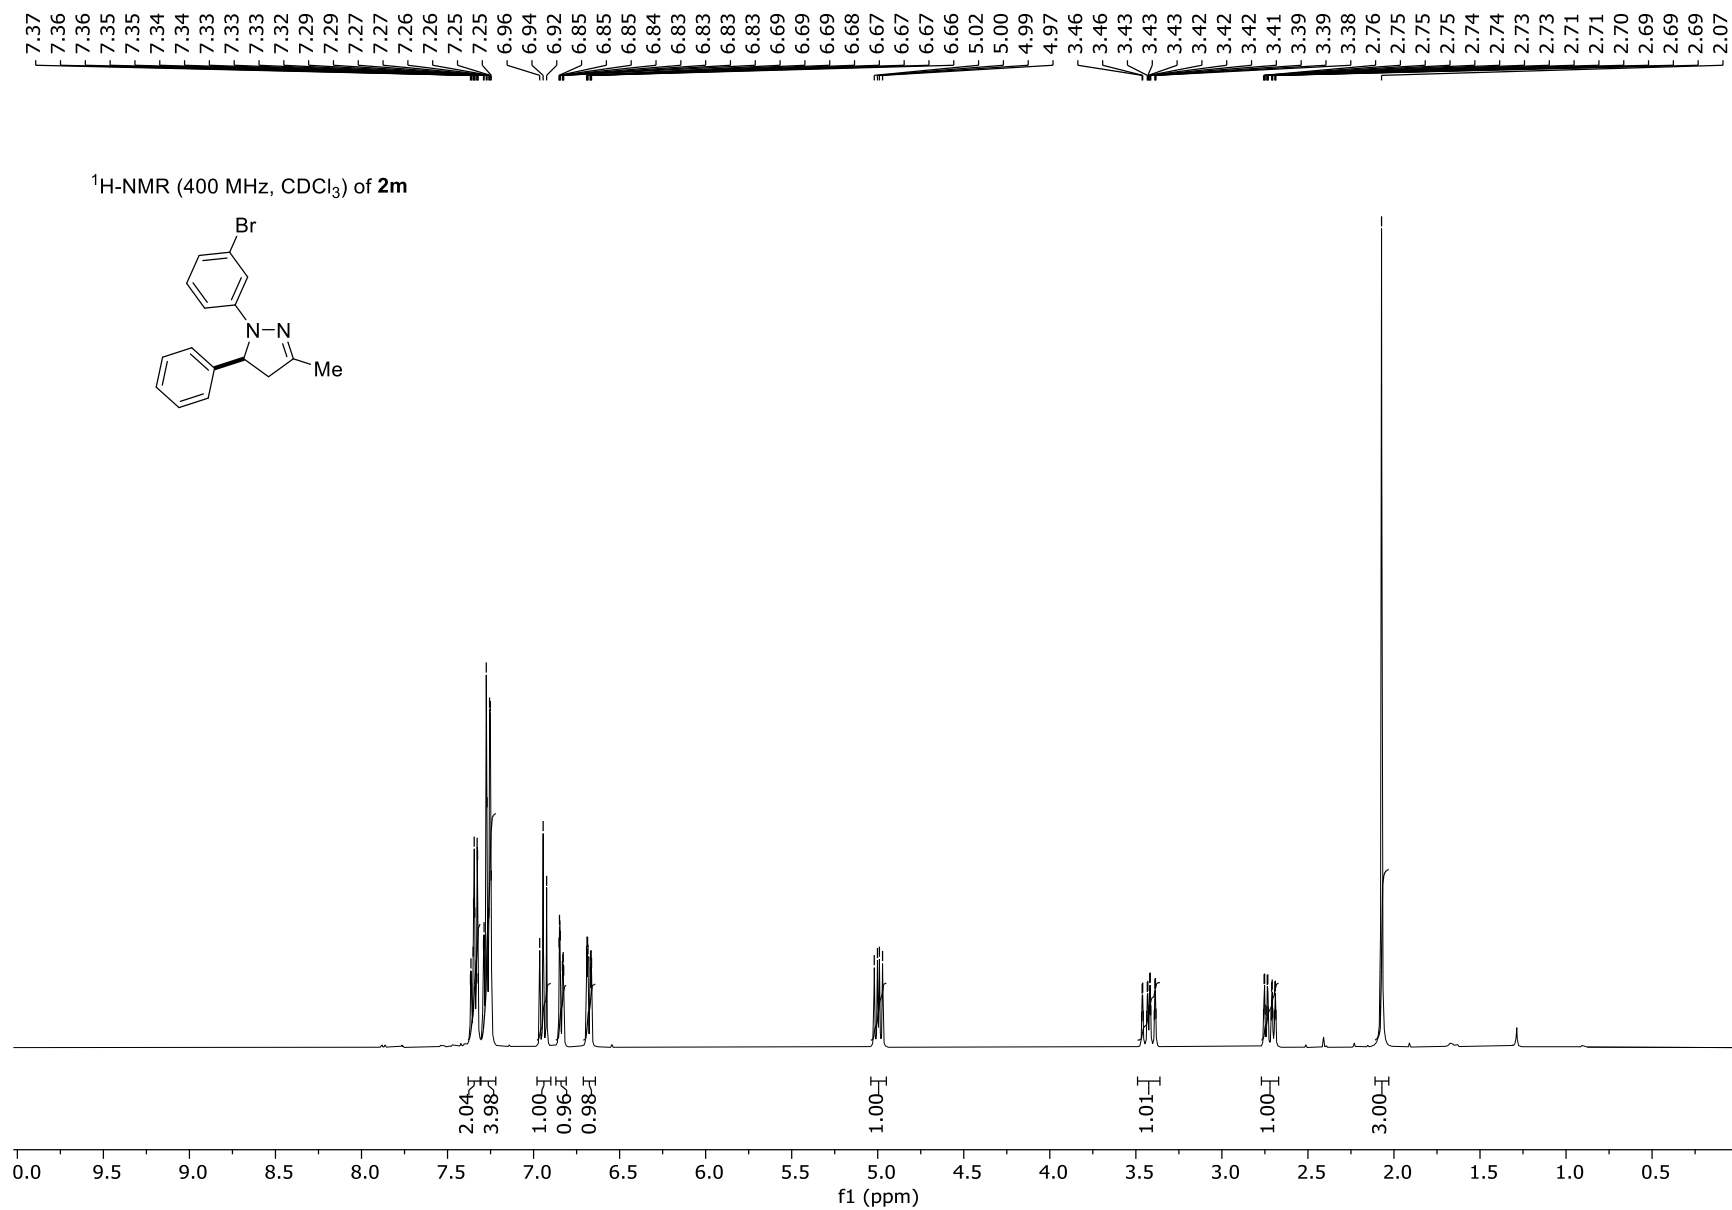

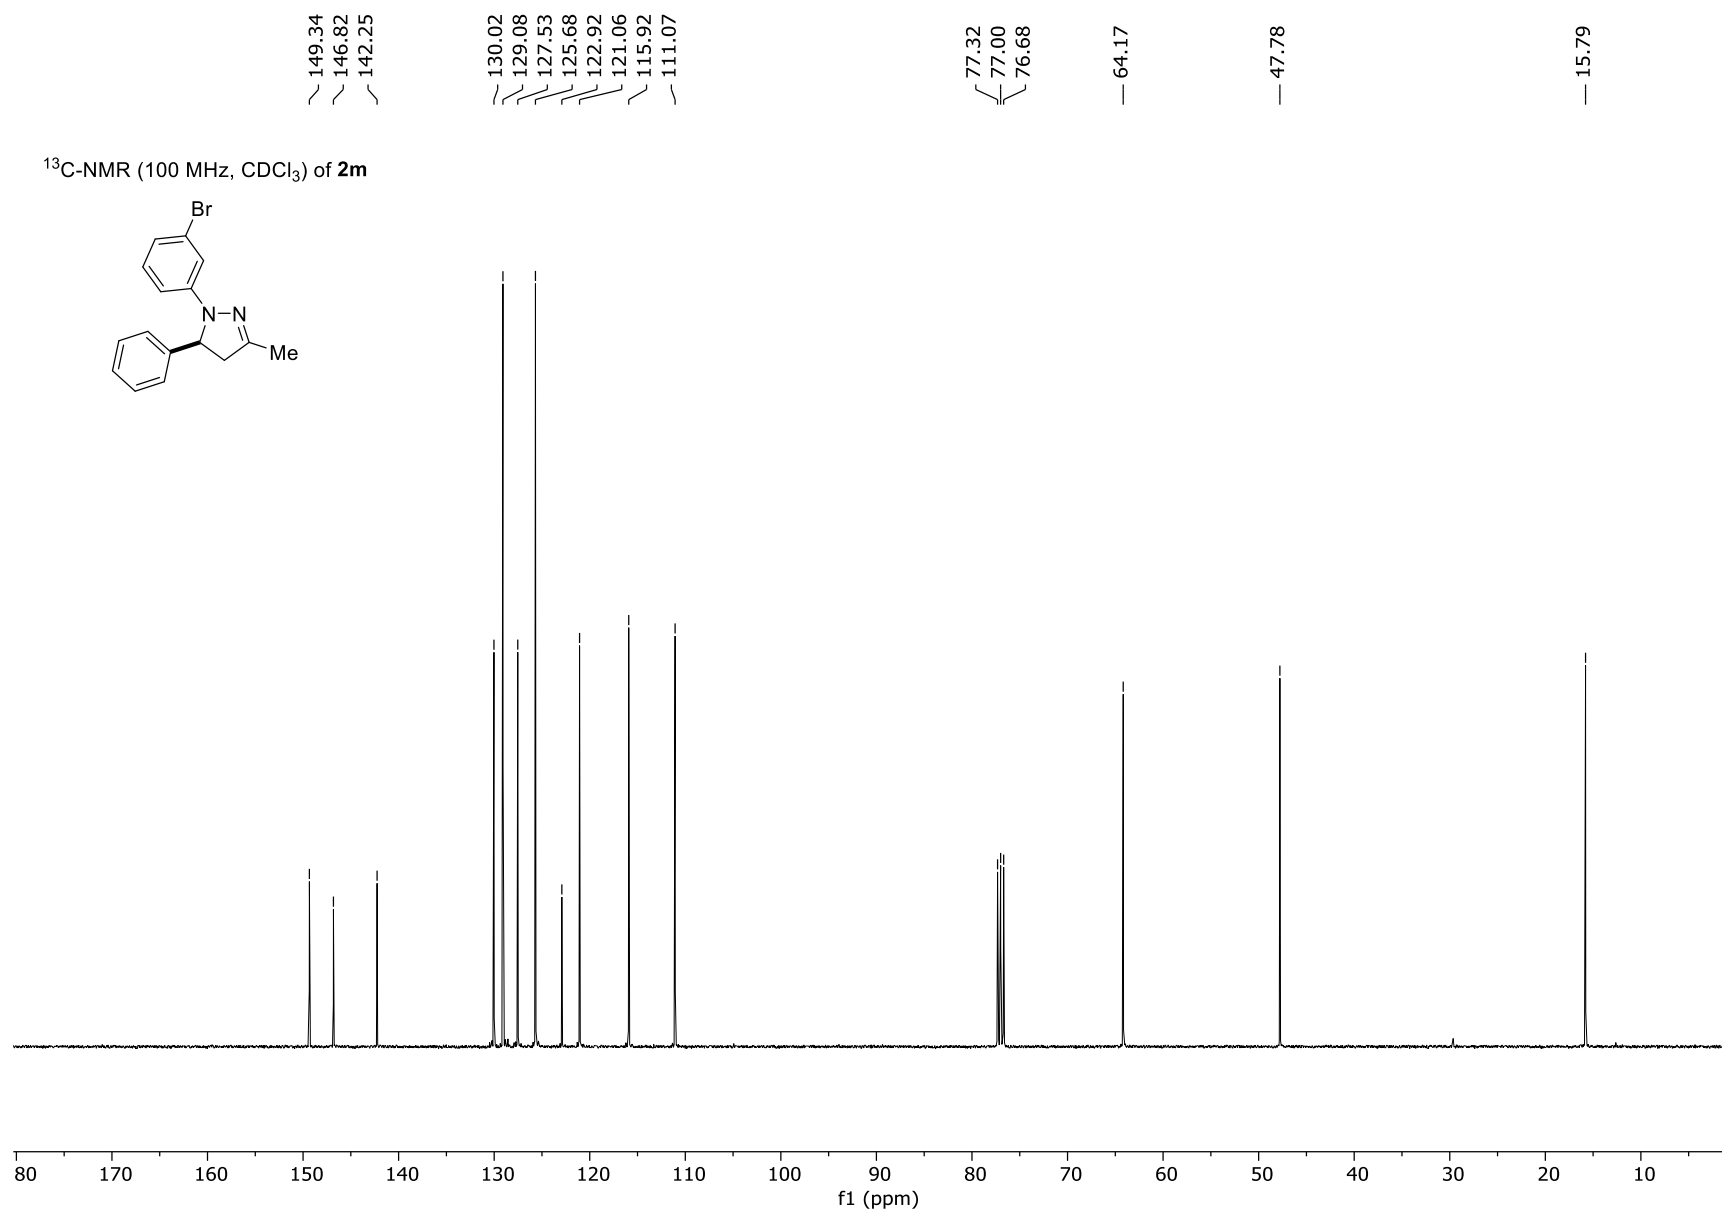

7.36  
7.36  
7.35  
7.34  
7.33  
7.29  
7.29  
7.28  
7.28  
7.27  
7.27  
7.26  
7.26  
7.26  
7.25  
7.24  
6.94  
6.92

5.11  
5.09  
5.09  
5.07

3.50  
3.50  
3.48  
3.48  
3.47  
3.47  
3.45  
3.45  
2.78  
2.78  
2.77  
2.77  
2.75  
2.75  
2.74  
2.74  
2.09

<sup>1</sup>H-NMR (400 MHz, CDCl<sub>3</sub>) of **2n**

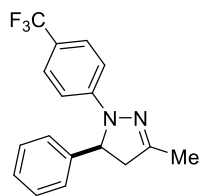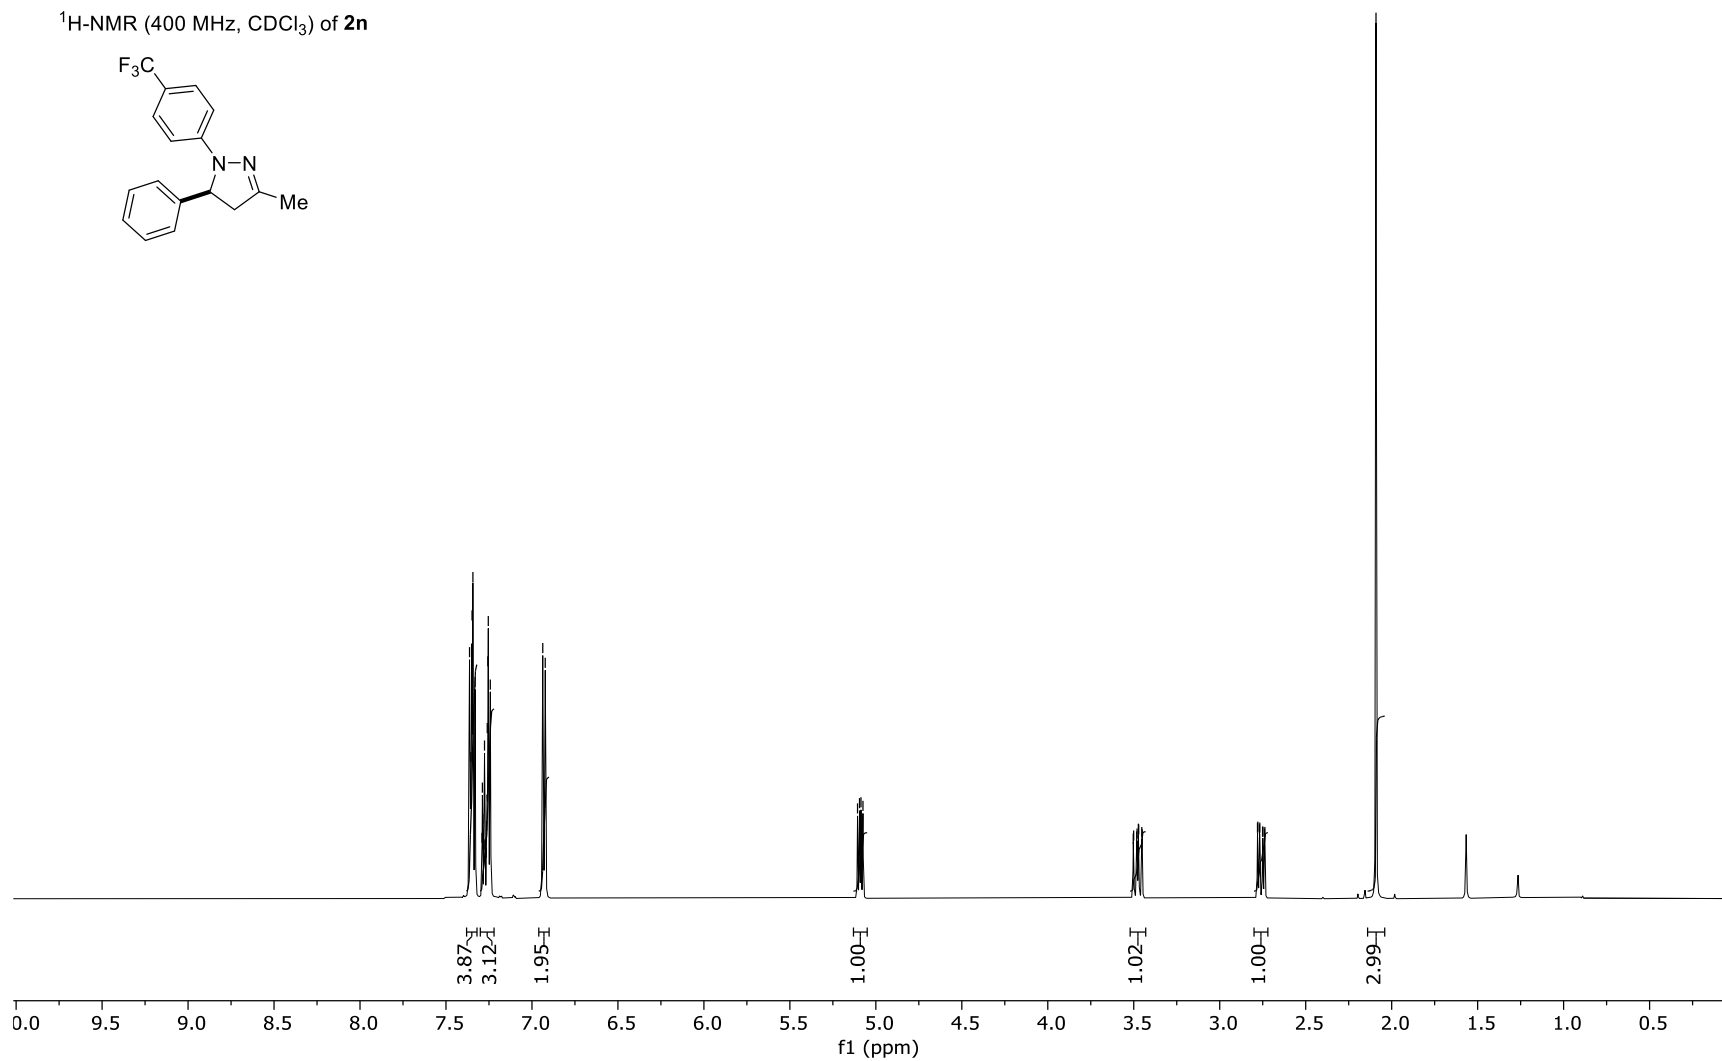

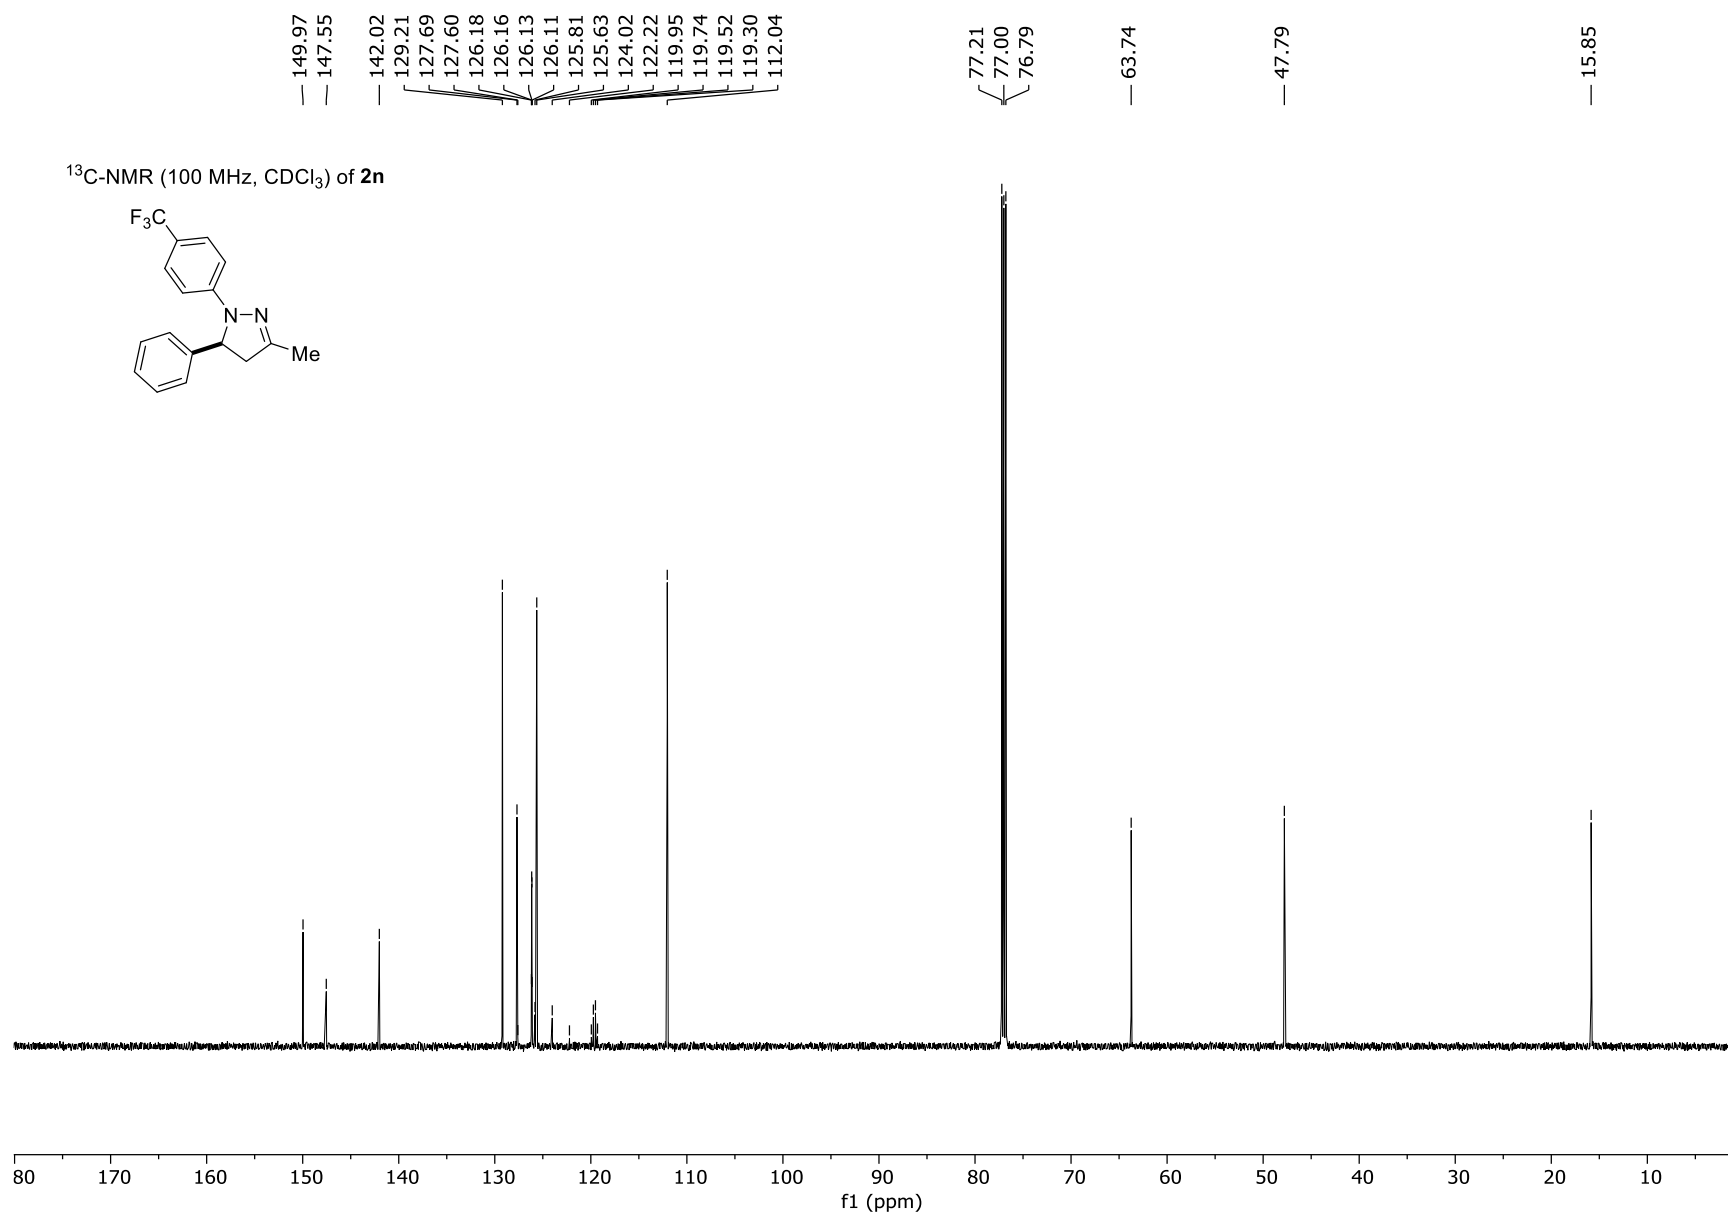

<sup>19</sup>F-NMR (377 MHz, CDCl<sub>3</sub>) of **2n**

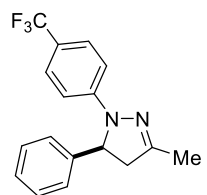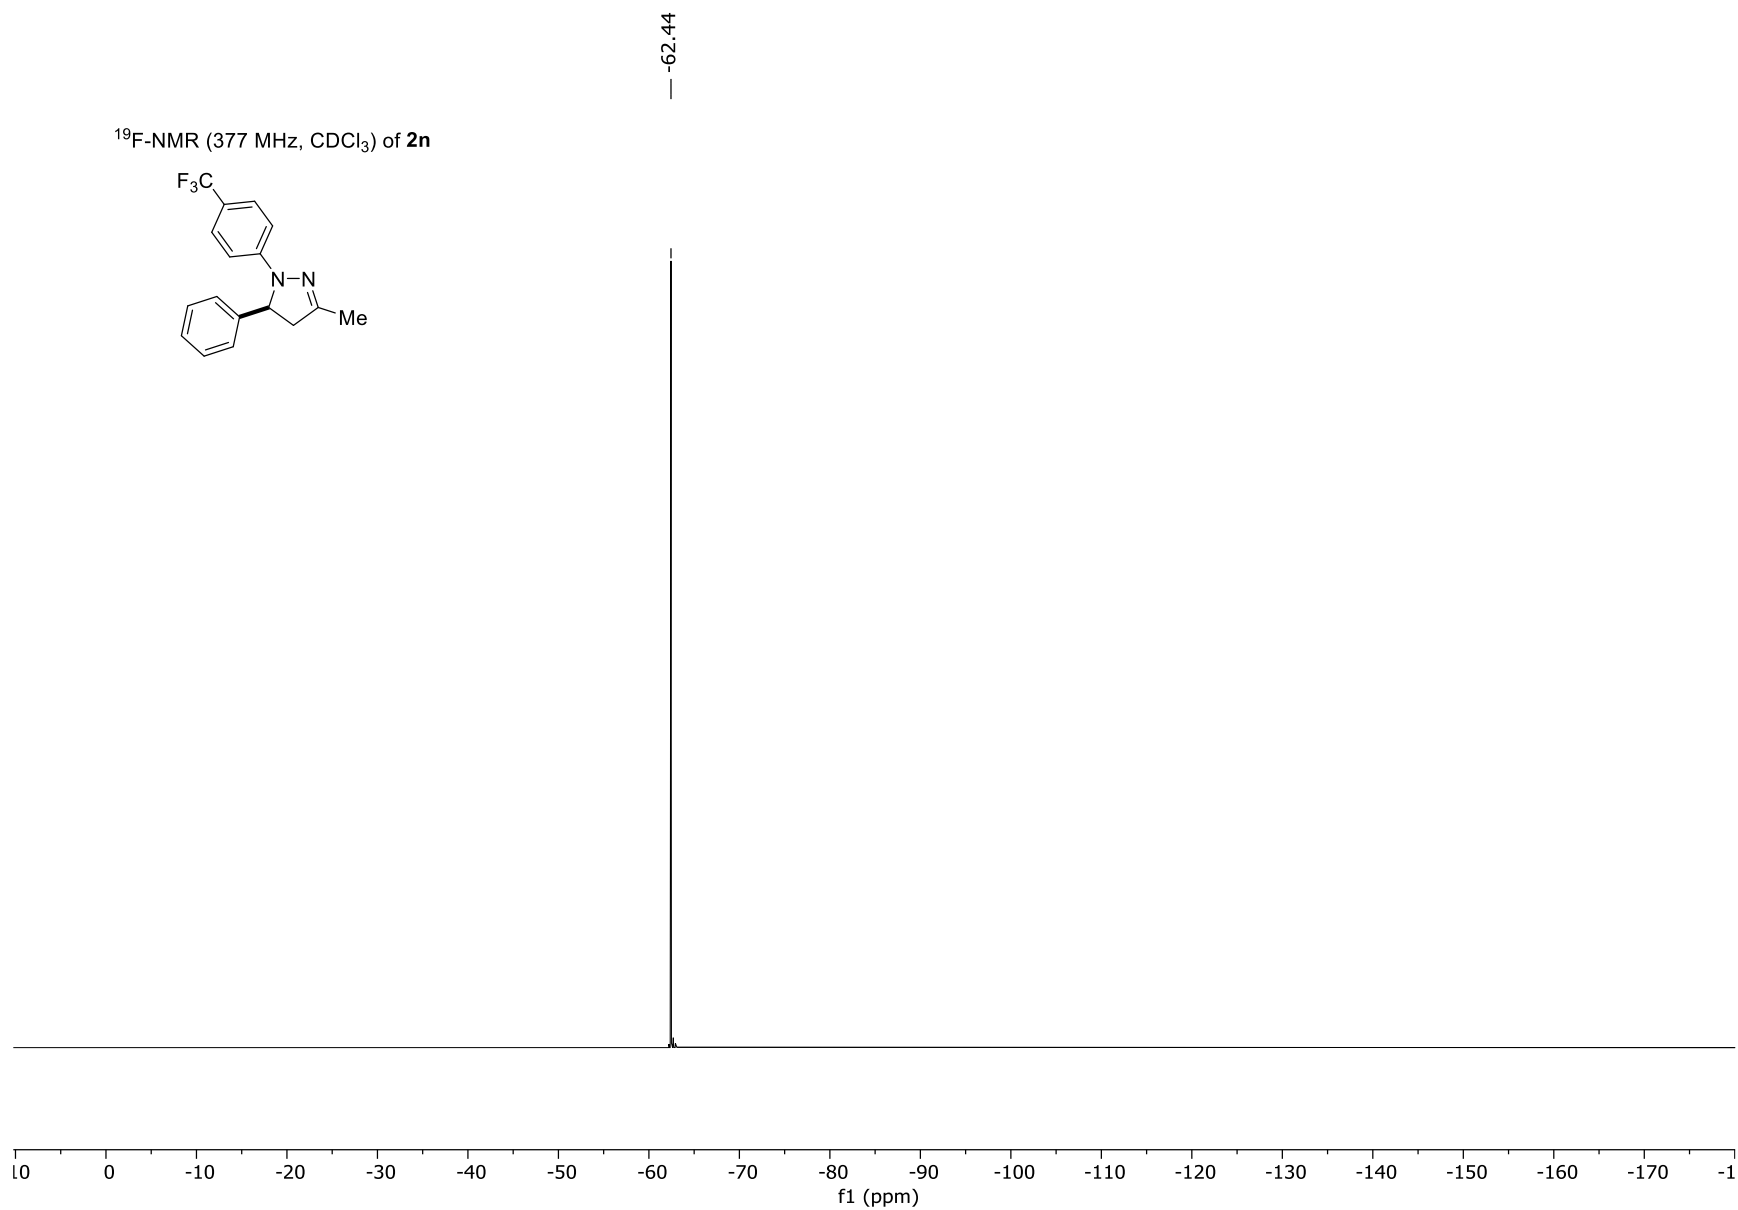



<sup>1</sup>H-NMR (400 MHz, CDCl<sub>3</sub>) of **2o**

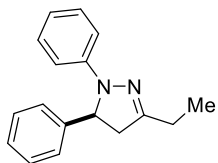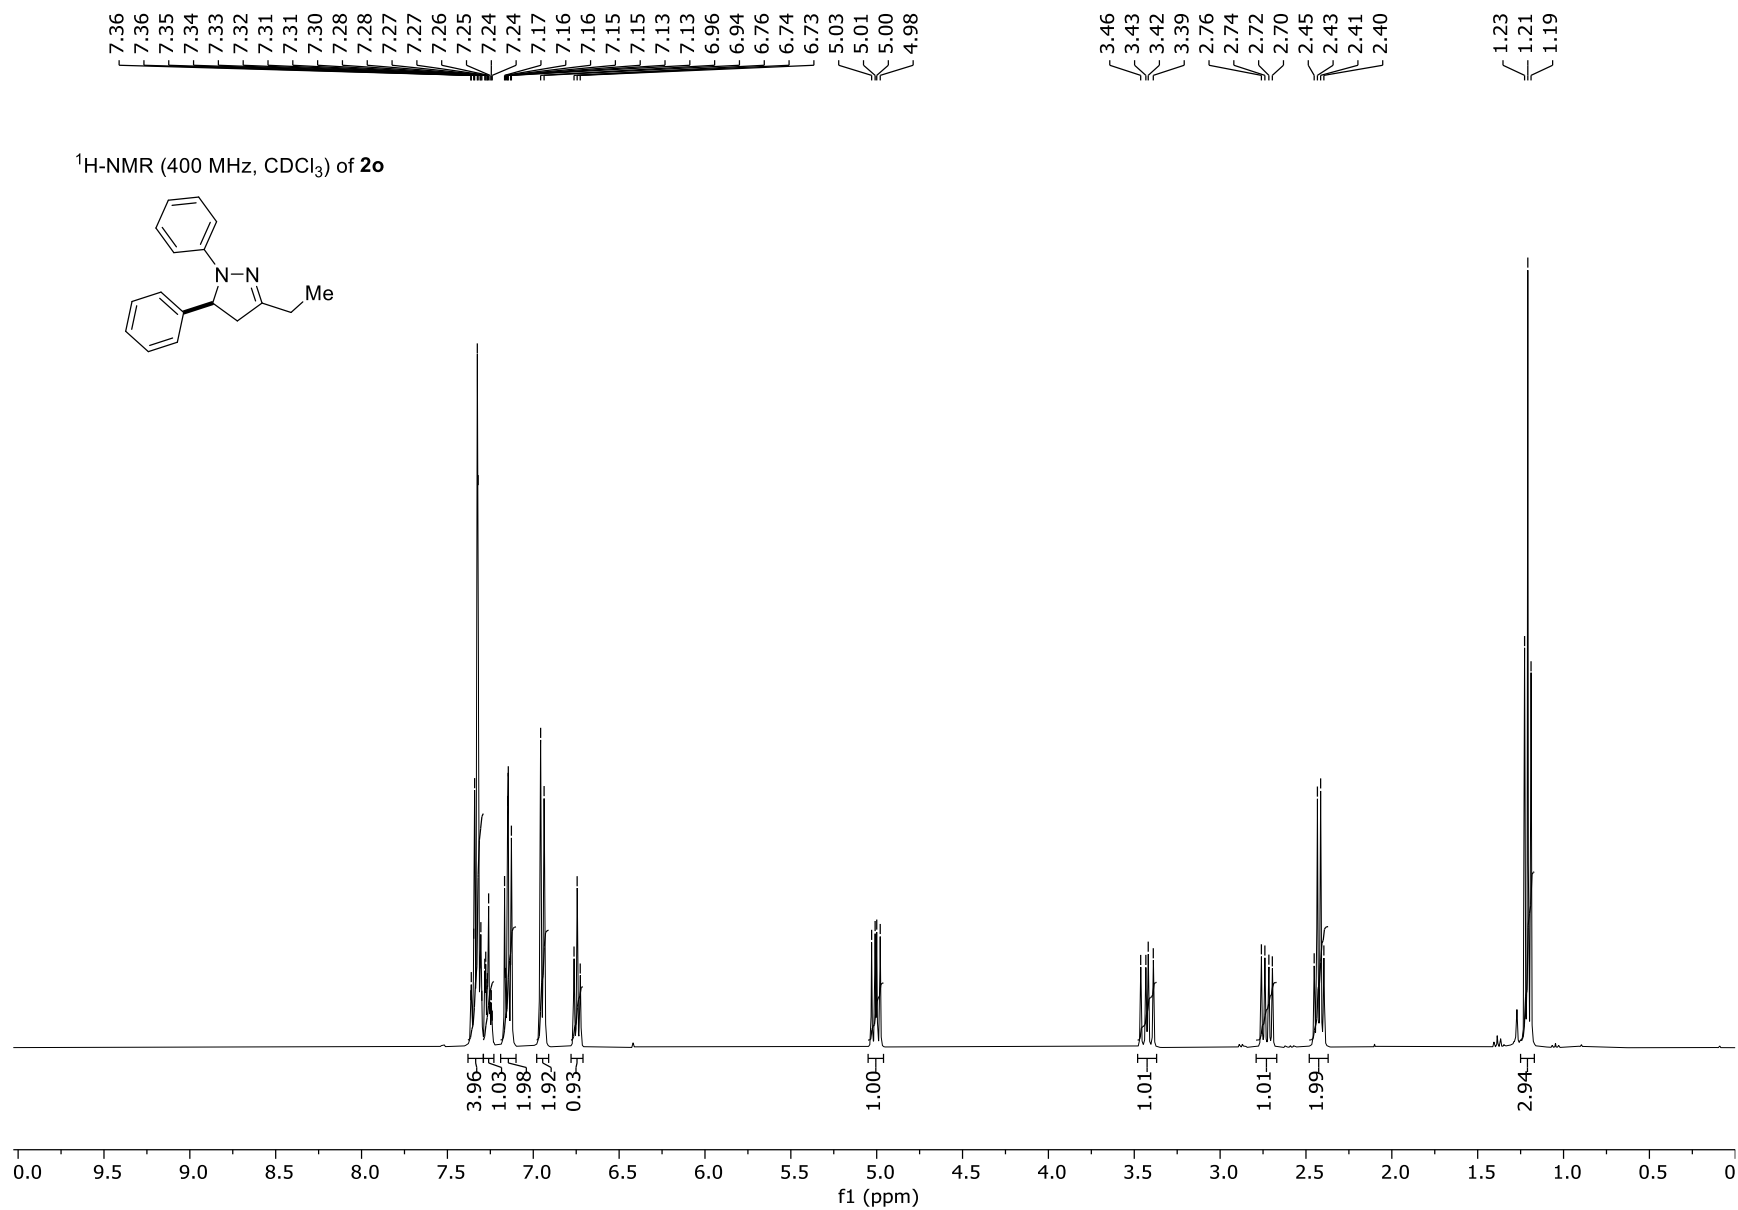

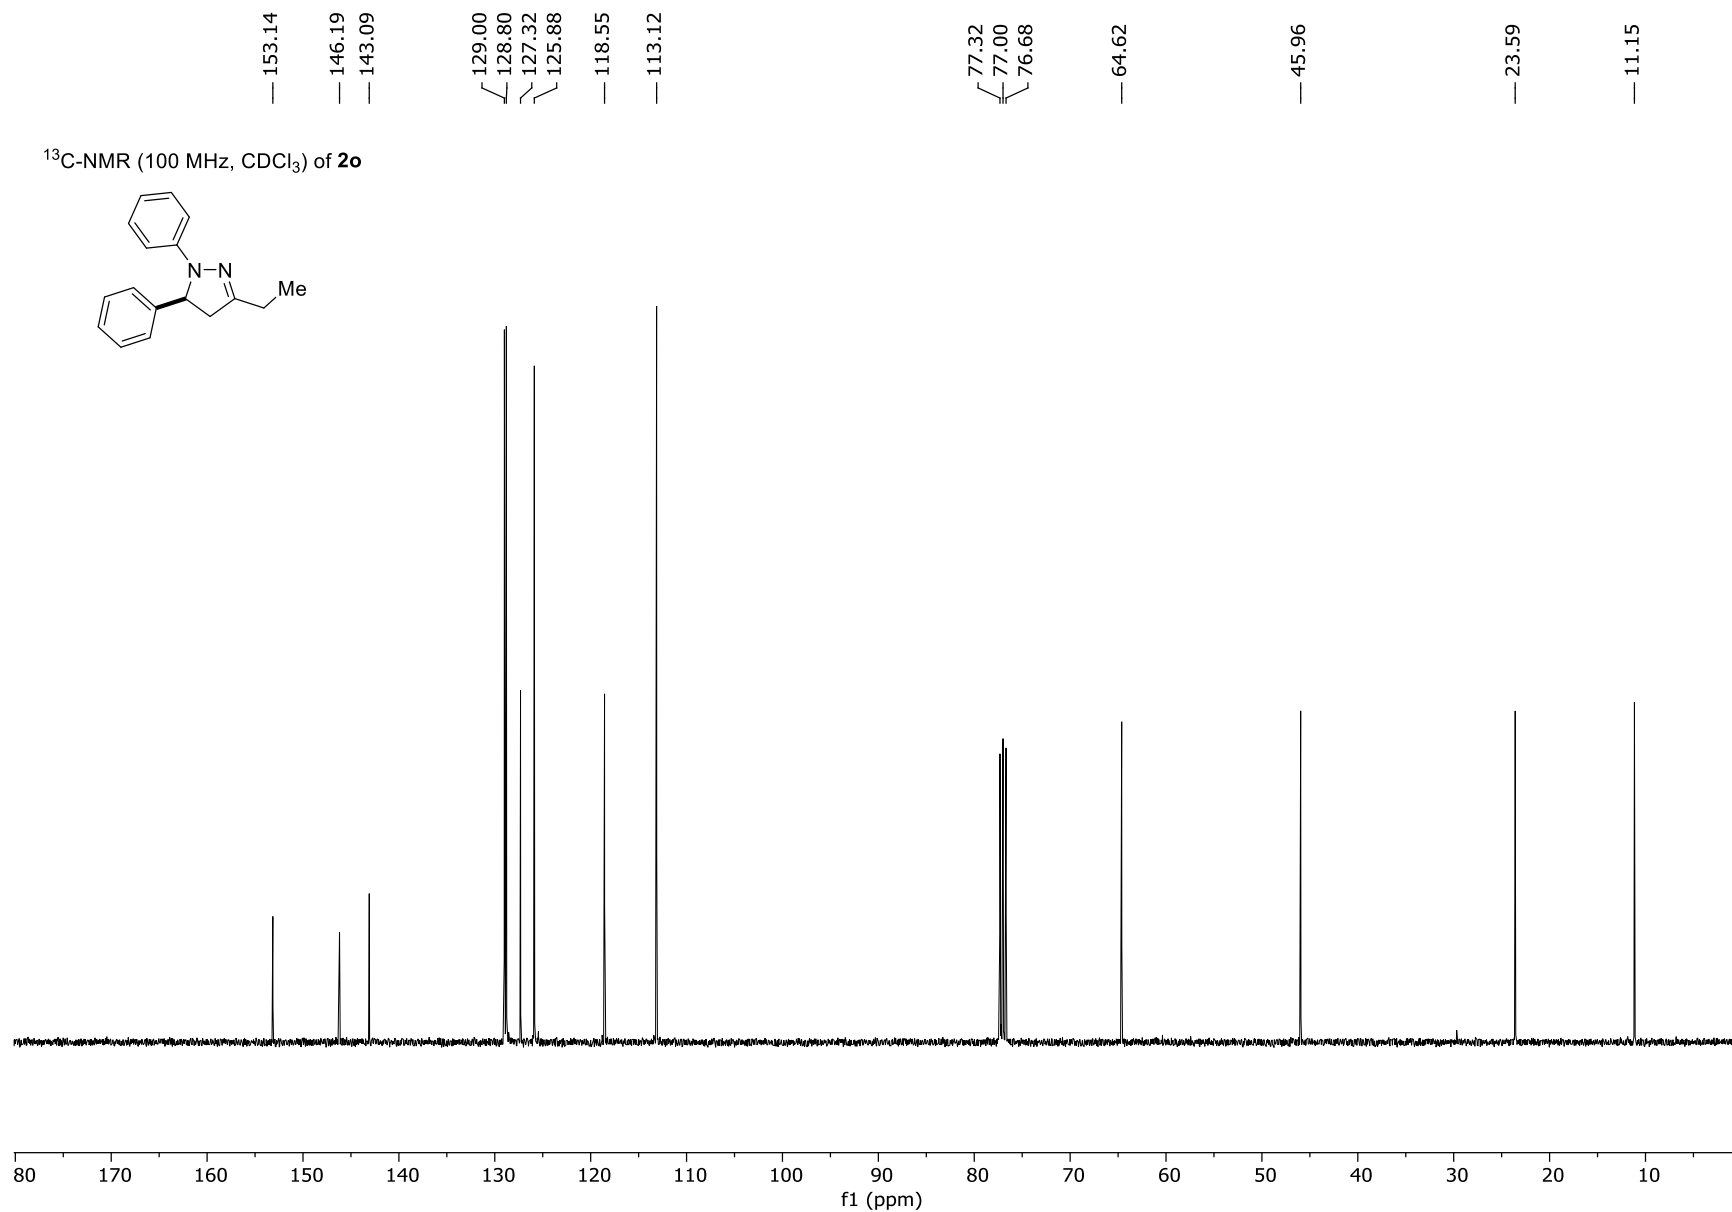

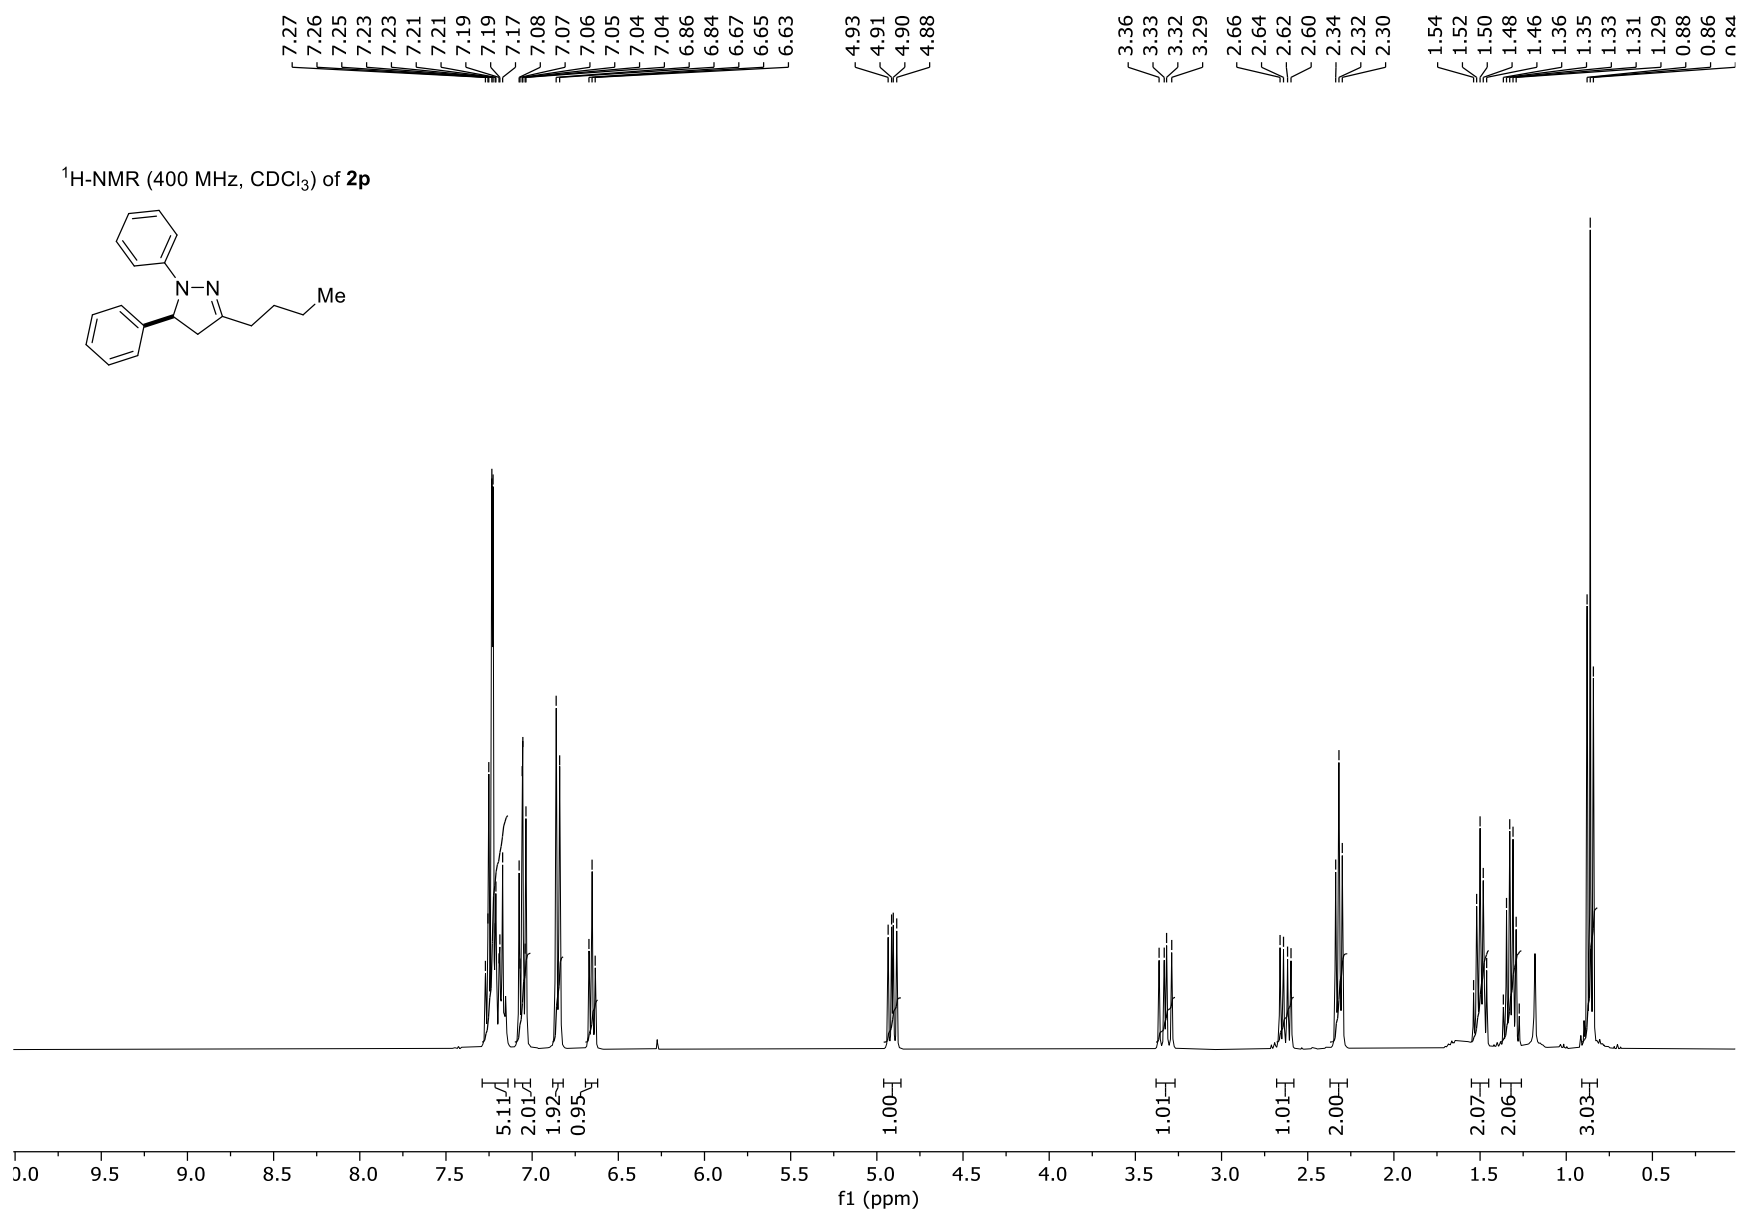

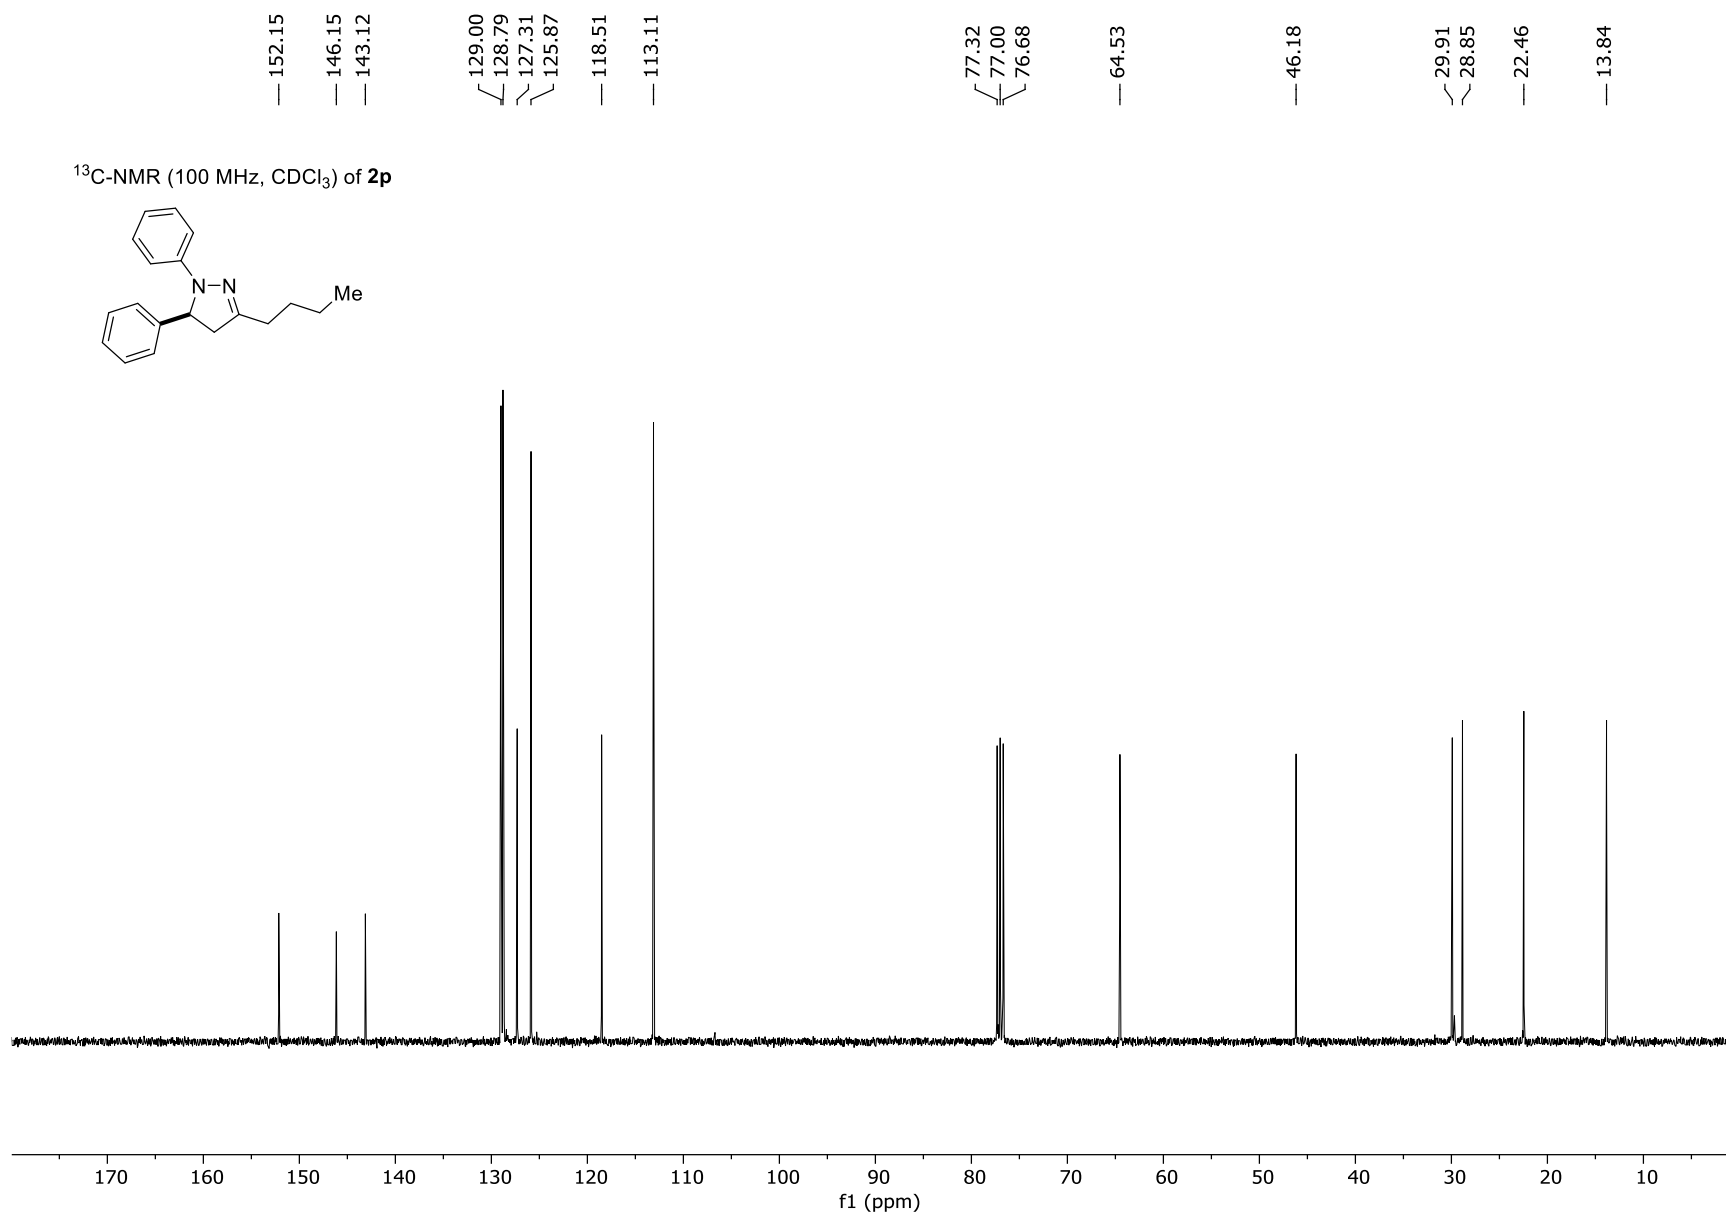

7.30  
7.30  
7.29  
7.28  
7.27  
7.26  
7.25  
7.24  
7.24  
7.23  
7.22  
7.21  
7.21  
7.20  
7.19  
7.19  
7.18  
7.18  
7.10  
7.10  
7.09  
7.08  
7.08  
7.07  
7.06  
6.89  
6.87  
6.69  
6.68  
6.66  
4.95  
4.93  
4.92  
4.90

3.40  
3.37  
3.36  
3.33  
2.71  
2.69  
2.68  
2.66  
2.65  
2.64  
2.63

1.15  
1.15  
1.13  
1.13

<sup>1</sup>H-NMR (400 MHz, CDCl<sub>3</sub>) of **2q**

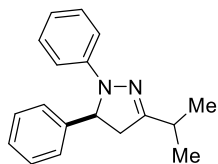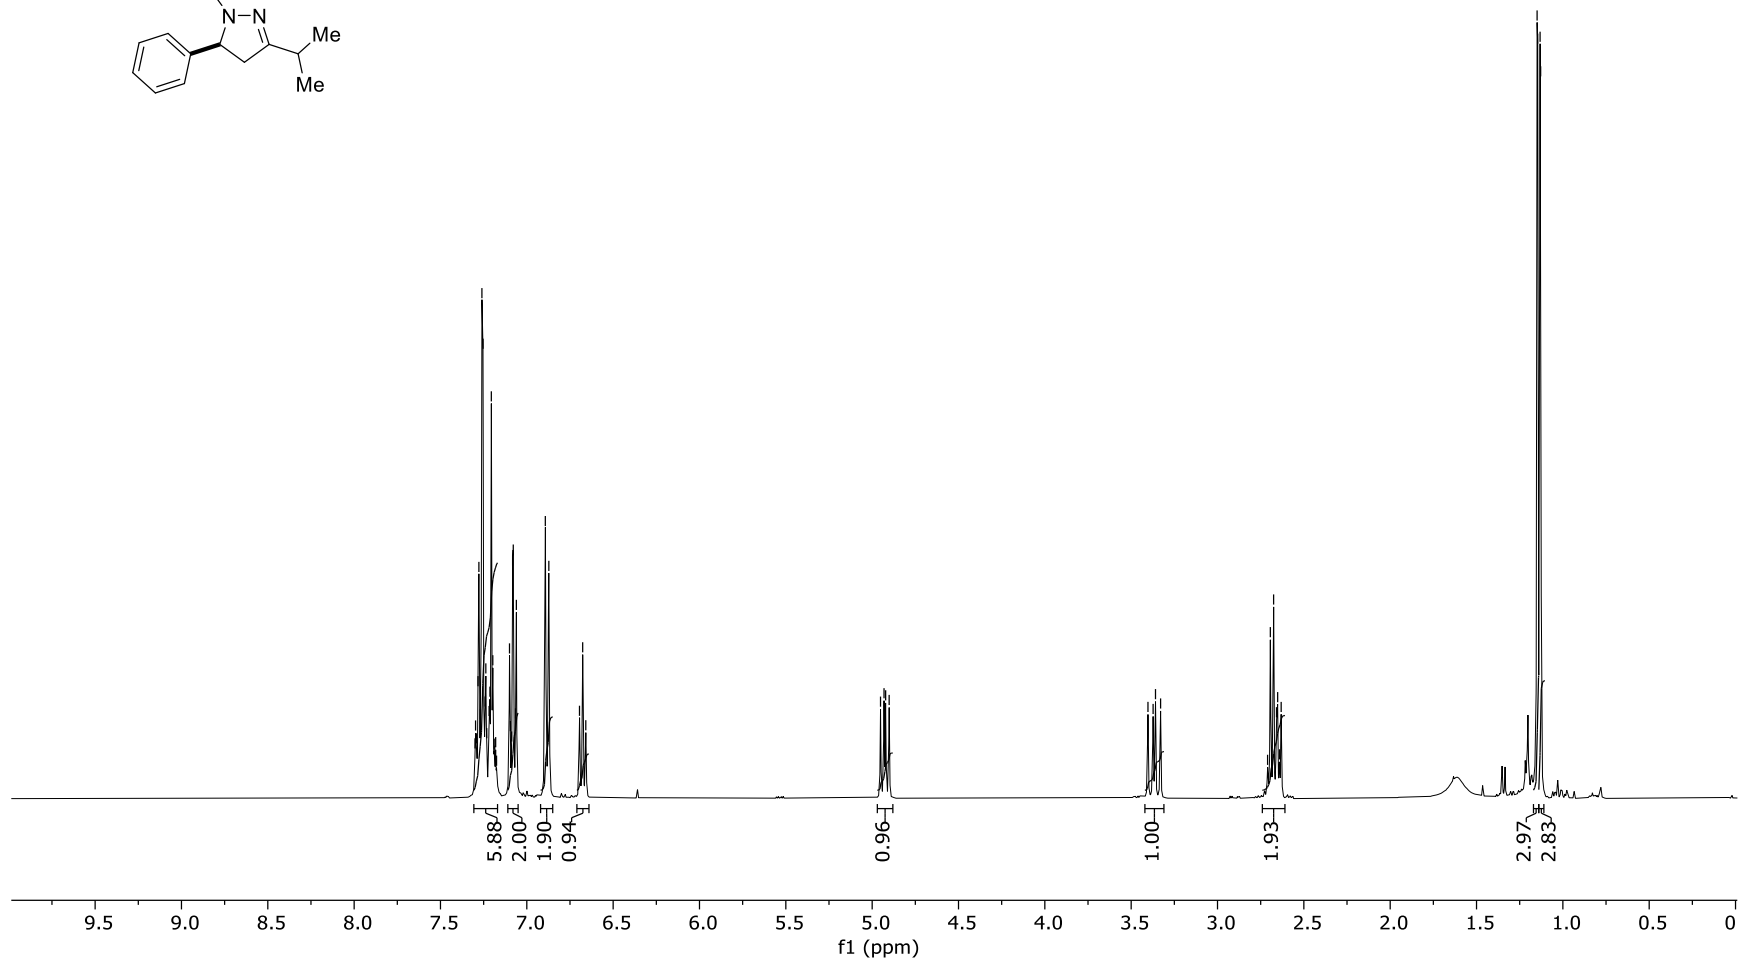

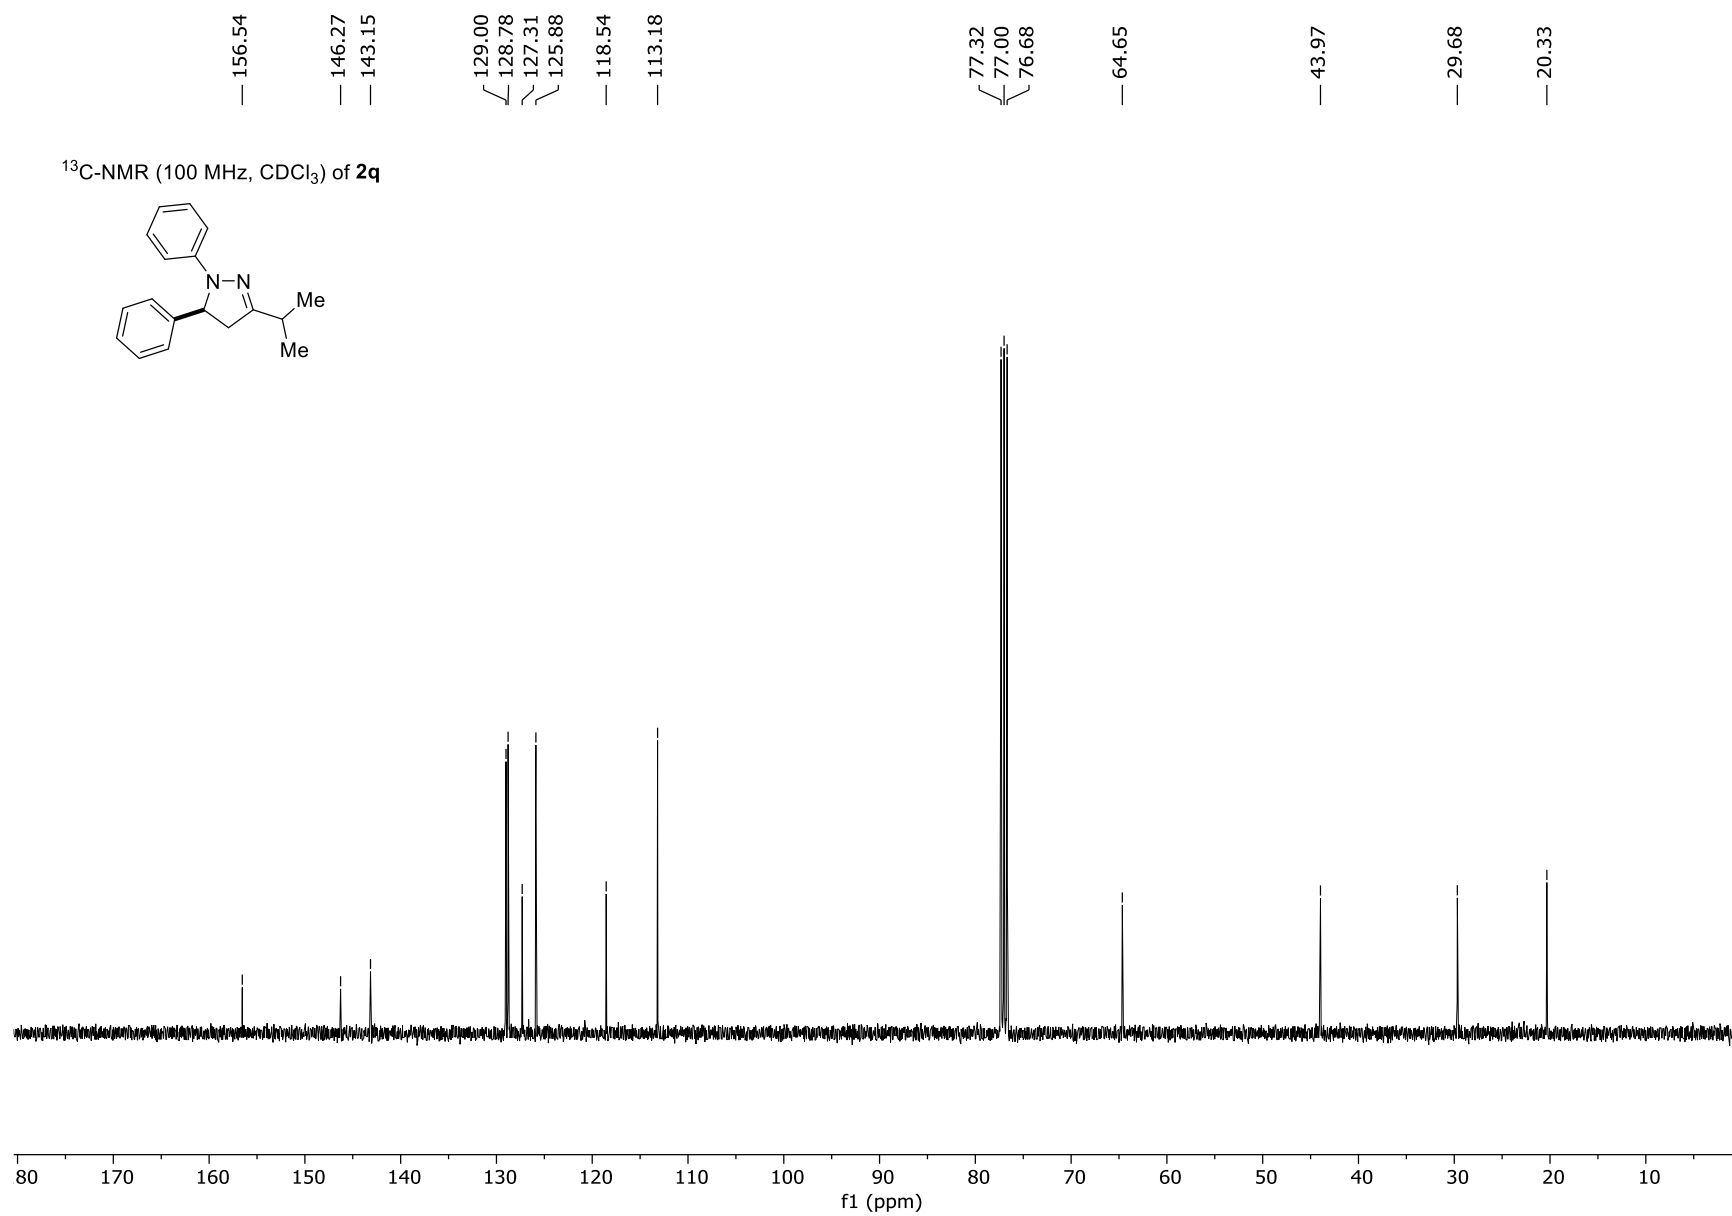

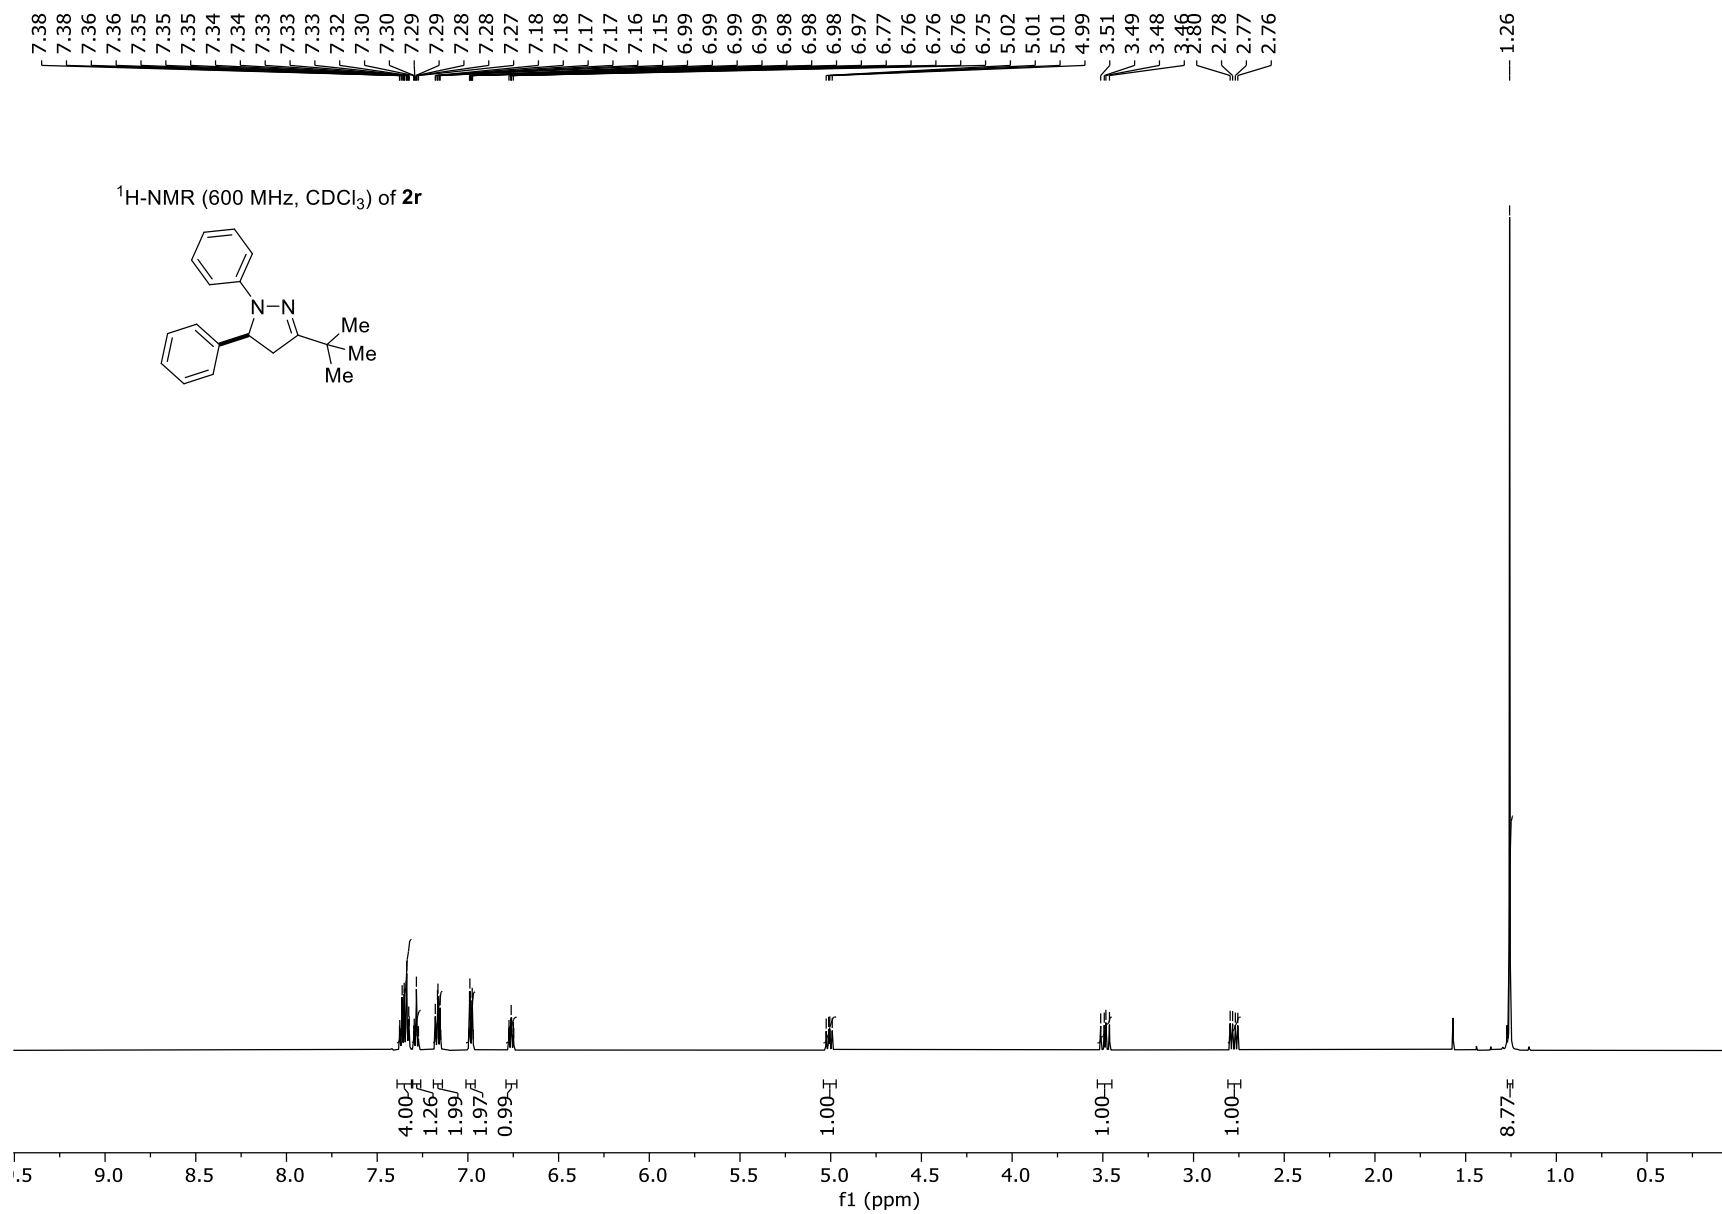

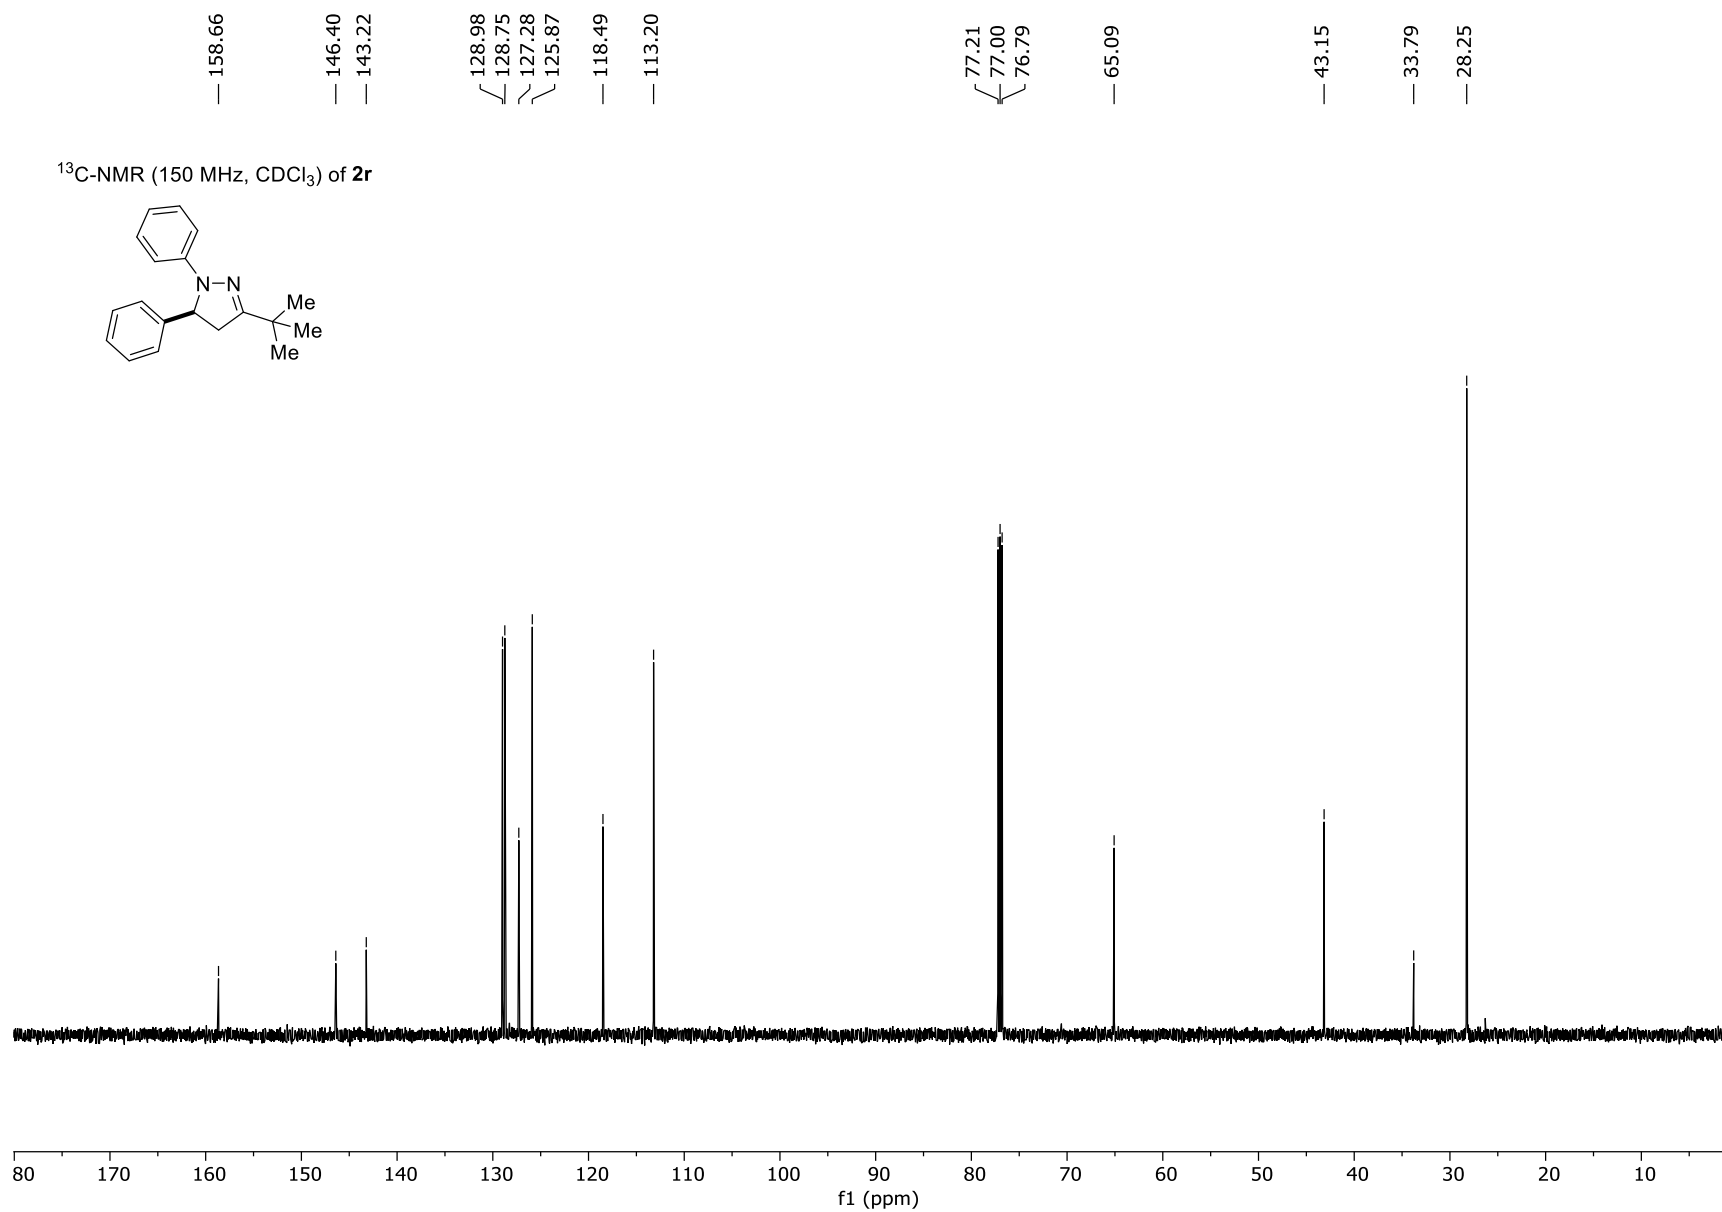



<sup>1</sup>H-NMR (600 MHz, CDCl<sub>3</sub>) of **2s**

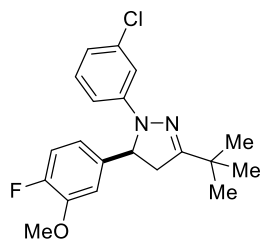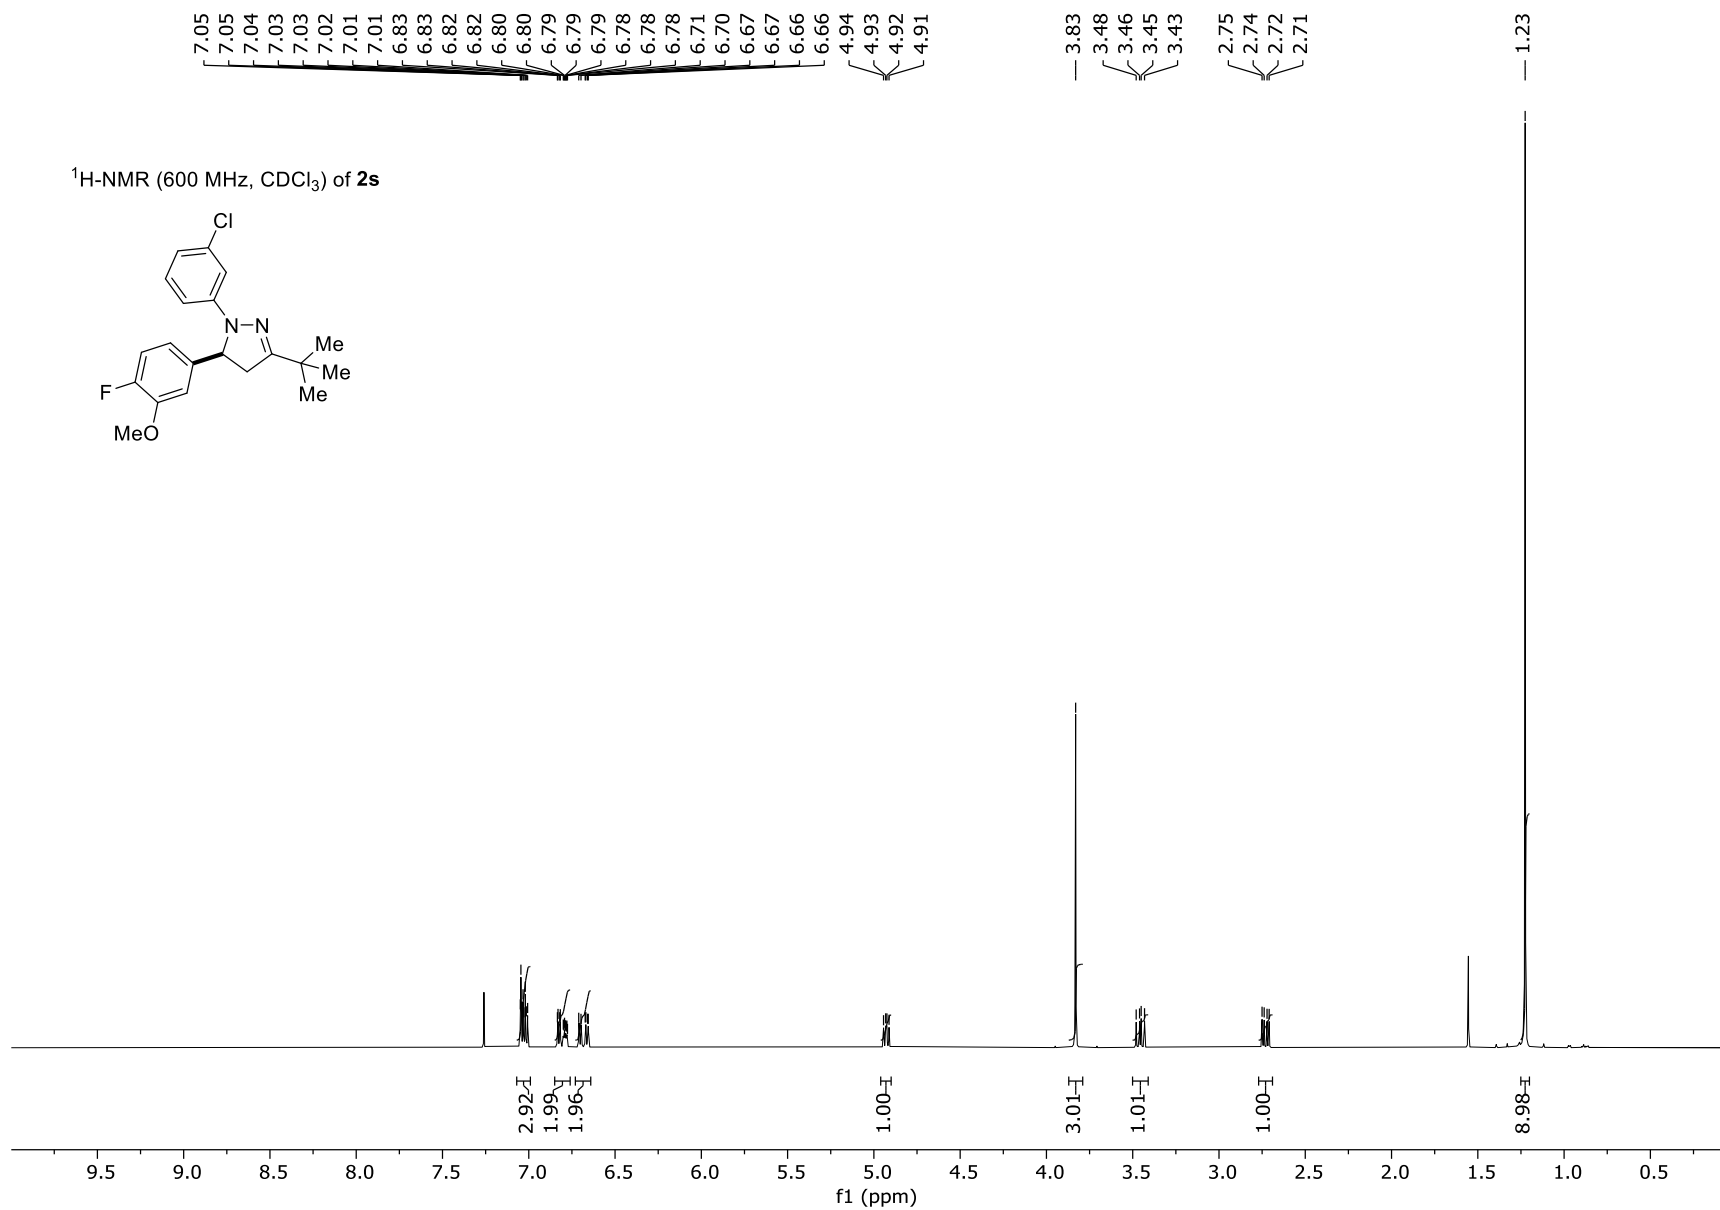

— 159.75  
— 152.50  
— 150.87  
— 148.29  
— 148.22  
— 147.07  
— 138.88  
— 138.85  
— 134.62  
— 129.77  
— 118.48  
— 117.96  
— 117.91  
— 116.52  
— 116.40  
— 113.30  
— 110.97  
— 110.47  
— 110.45

— 77.21  
— 77.00  
— 76.79

— 64.39

— 56.26

— 43.22

— 33.86

— 28.21

<sup>13</sup>C-NMR (150 MHz, CDCl<sub>3</sub>) of **2s**

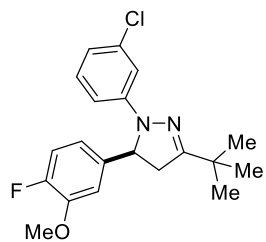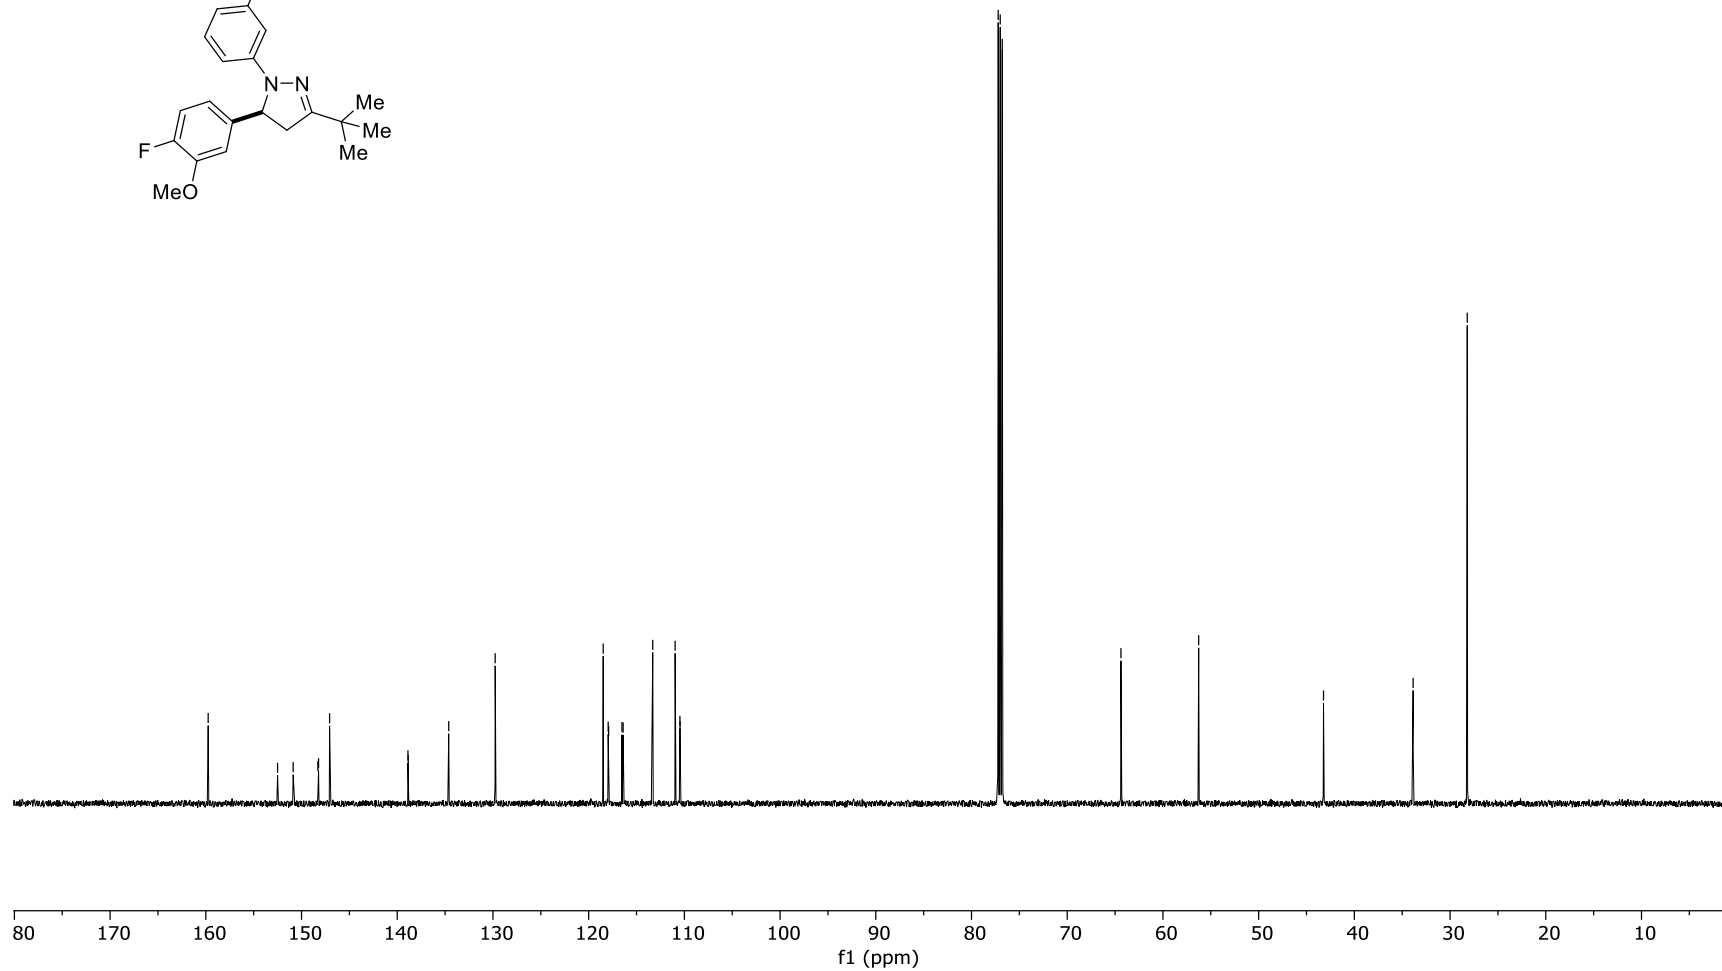

<sup>19</sup>F-NMR (377 MHz, CDCl<sub>3</sub>) of **2s**

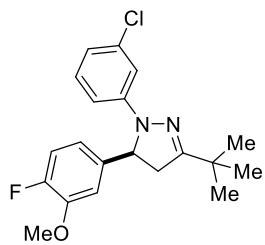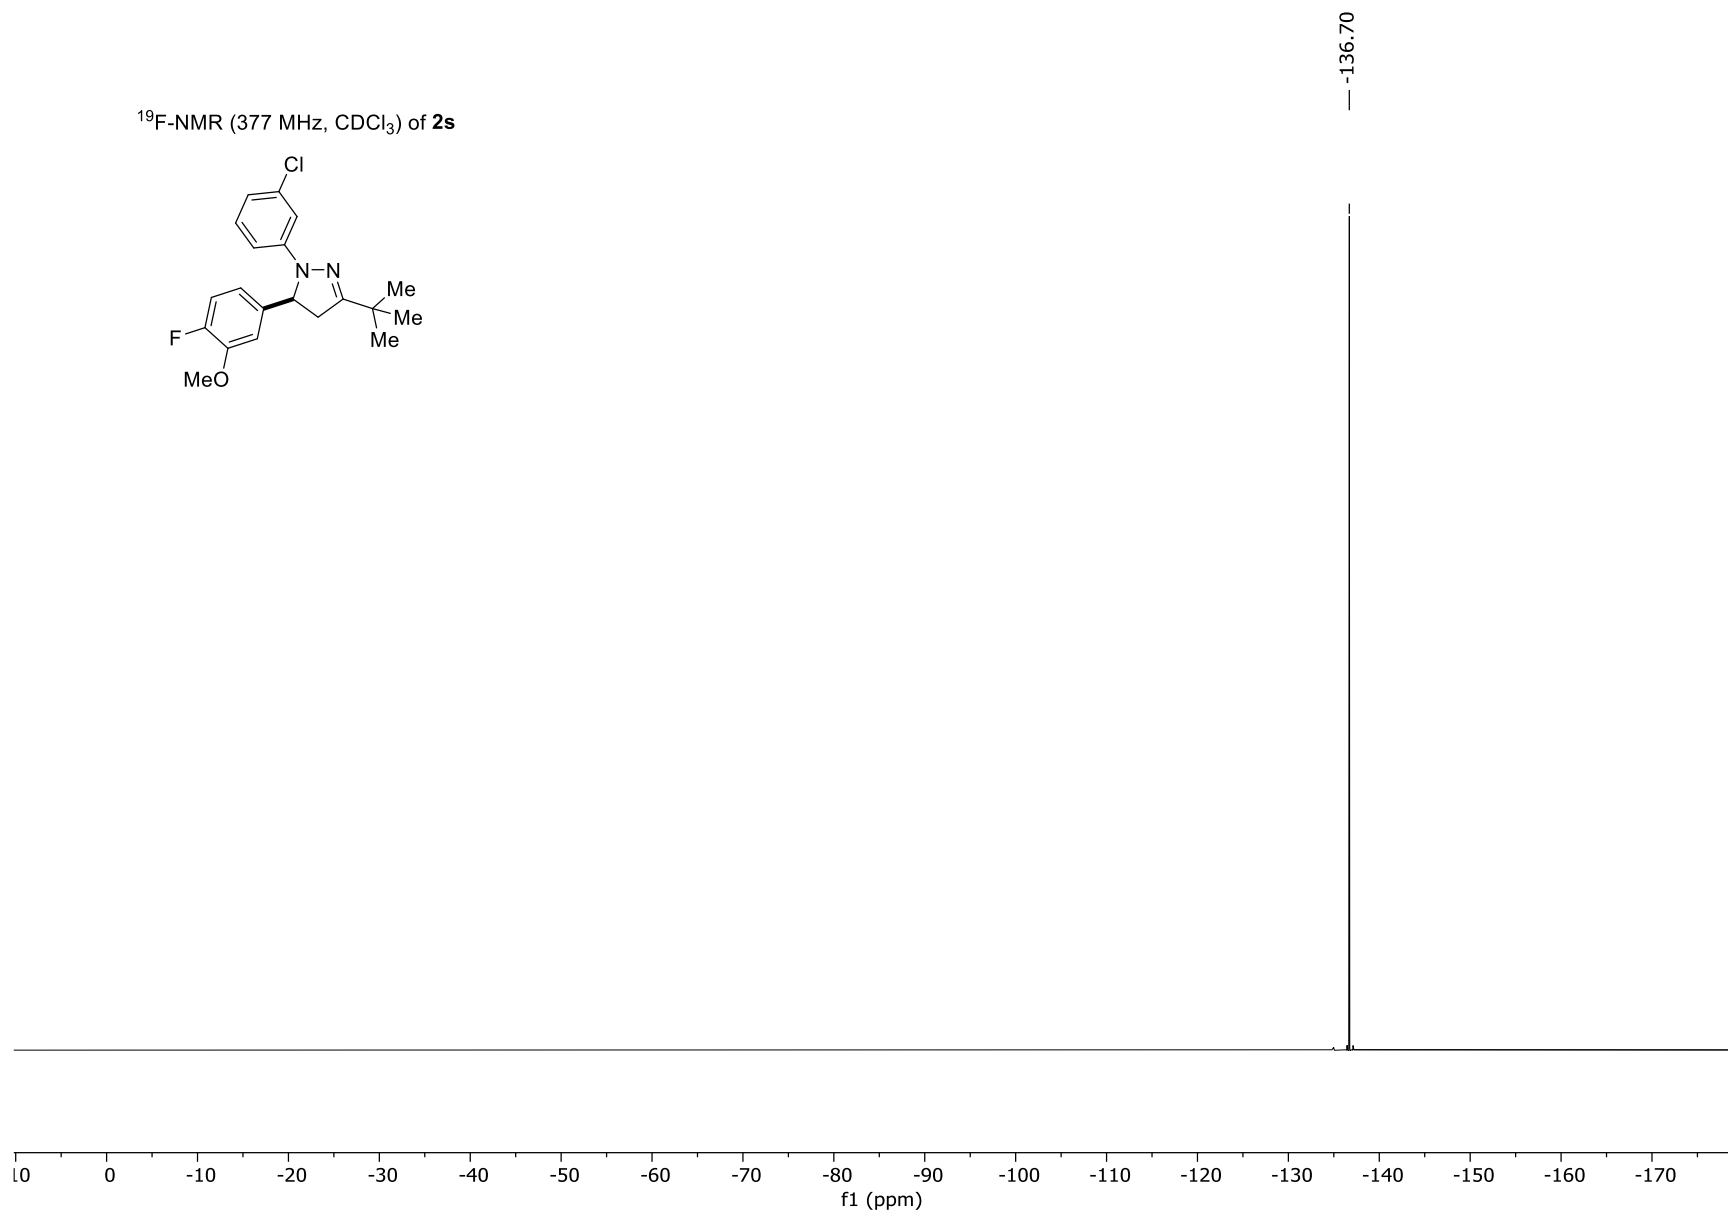

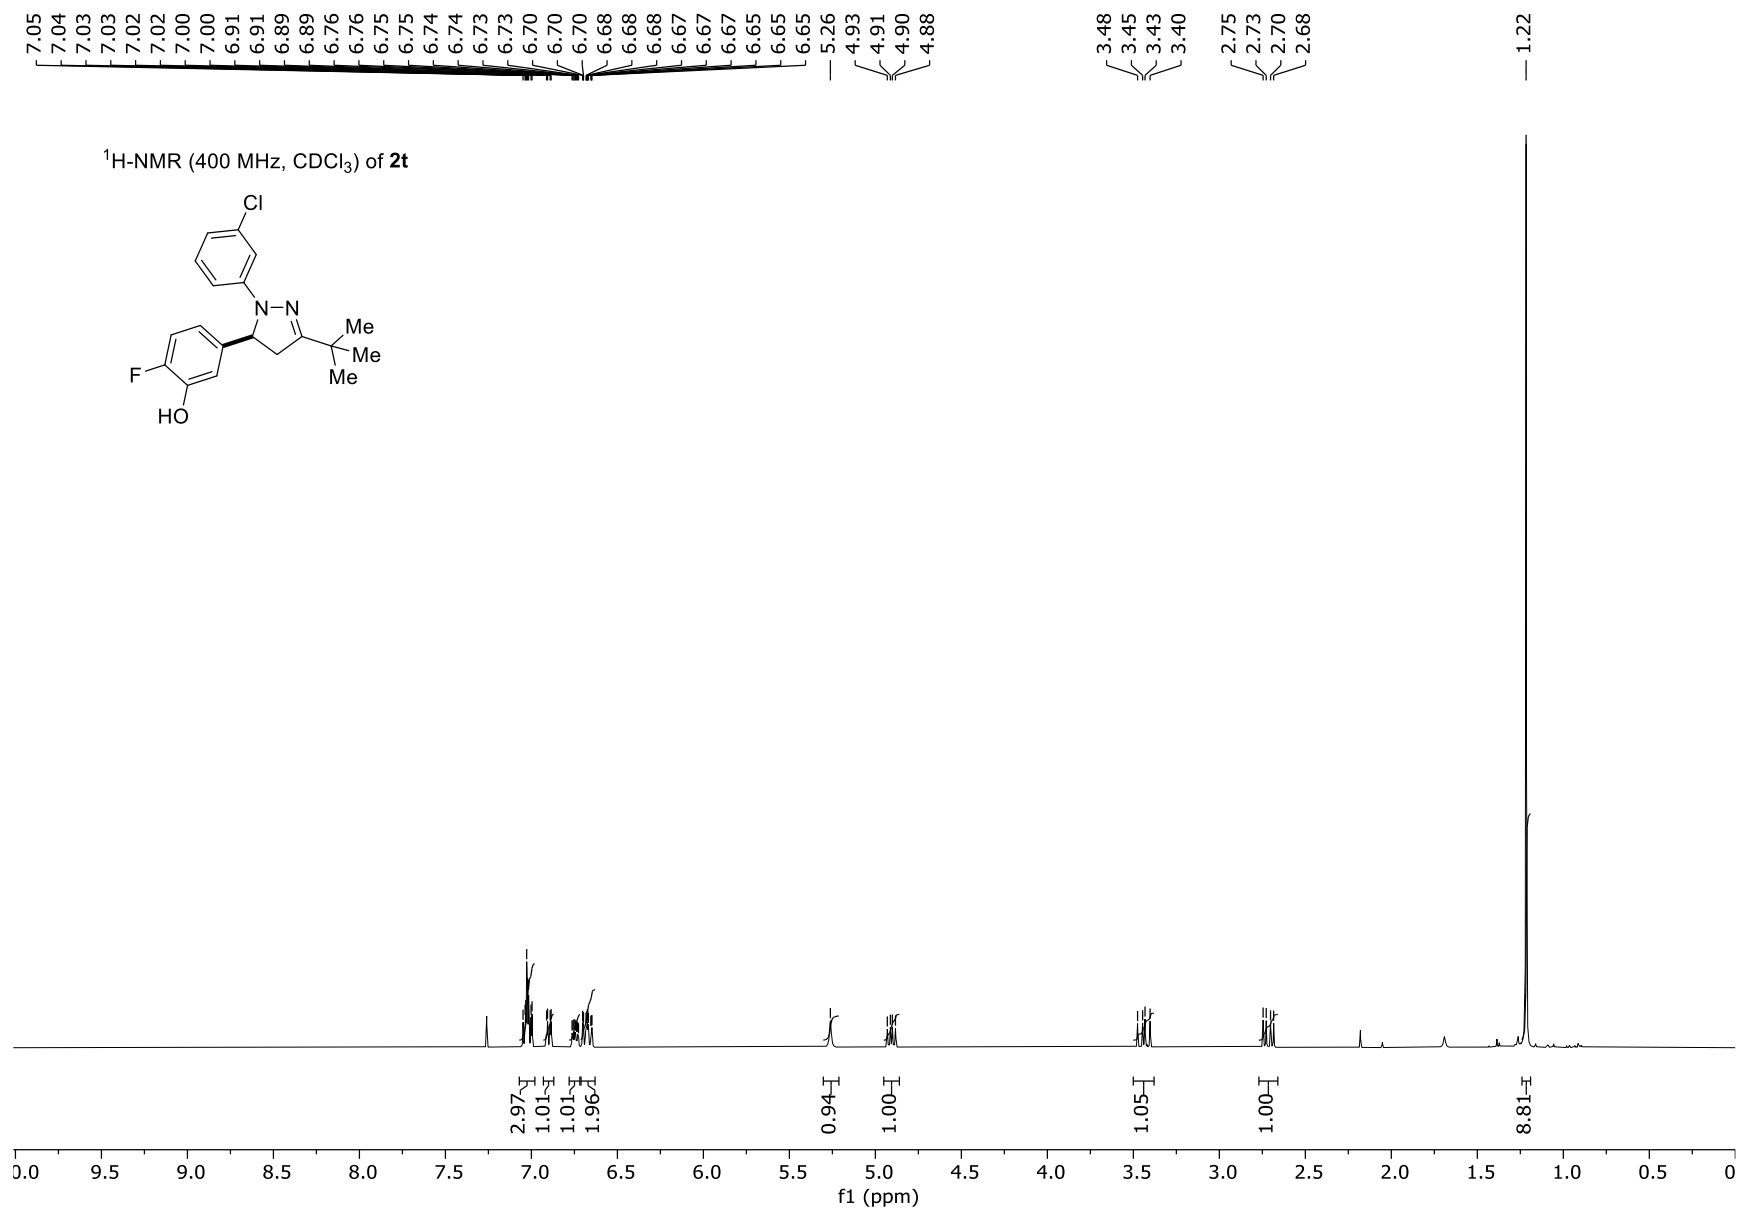

— 159.57  
— 151.05  
— 149.48  
— 146.85  
— 144.05  
— 143.96  
— 139.54  
— 139.51  
— 134.60  
— 129.75  
— 118.32  
— 117.89  
— 117.85  
— 116.14  
— 116.02  
— 114.50  
— 114.49  
— 113.18  
— 110.88

— 77.21  
— 77.00  
— 76.79

— 63.84

— 43.10

— 33.82

— 28.19

<sup>13</sup>C-NMR (150 MHz, CDCl<sub>3</sub>) of **2t**

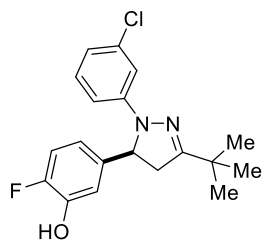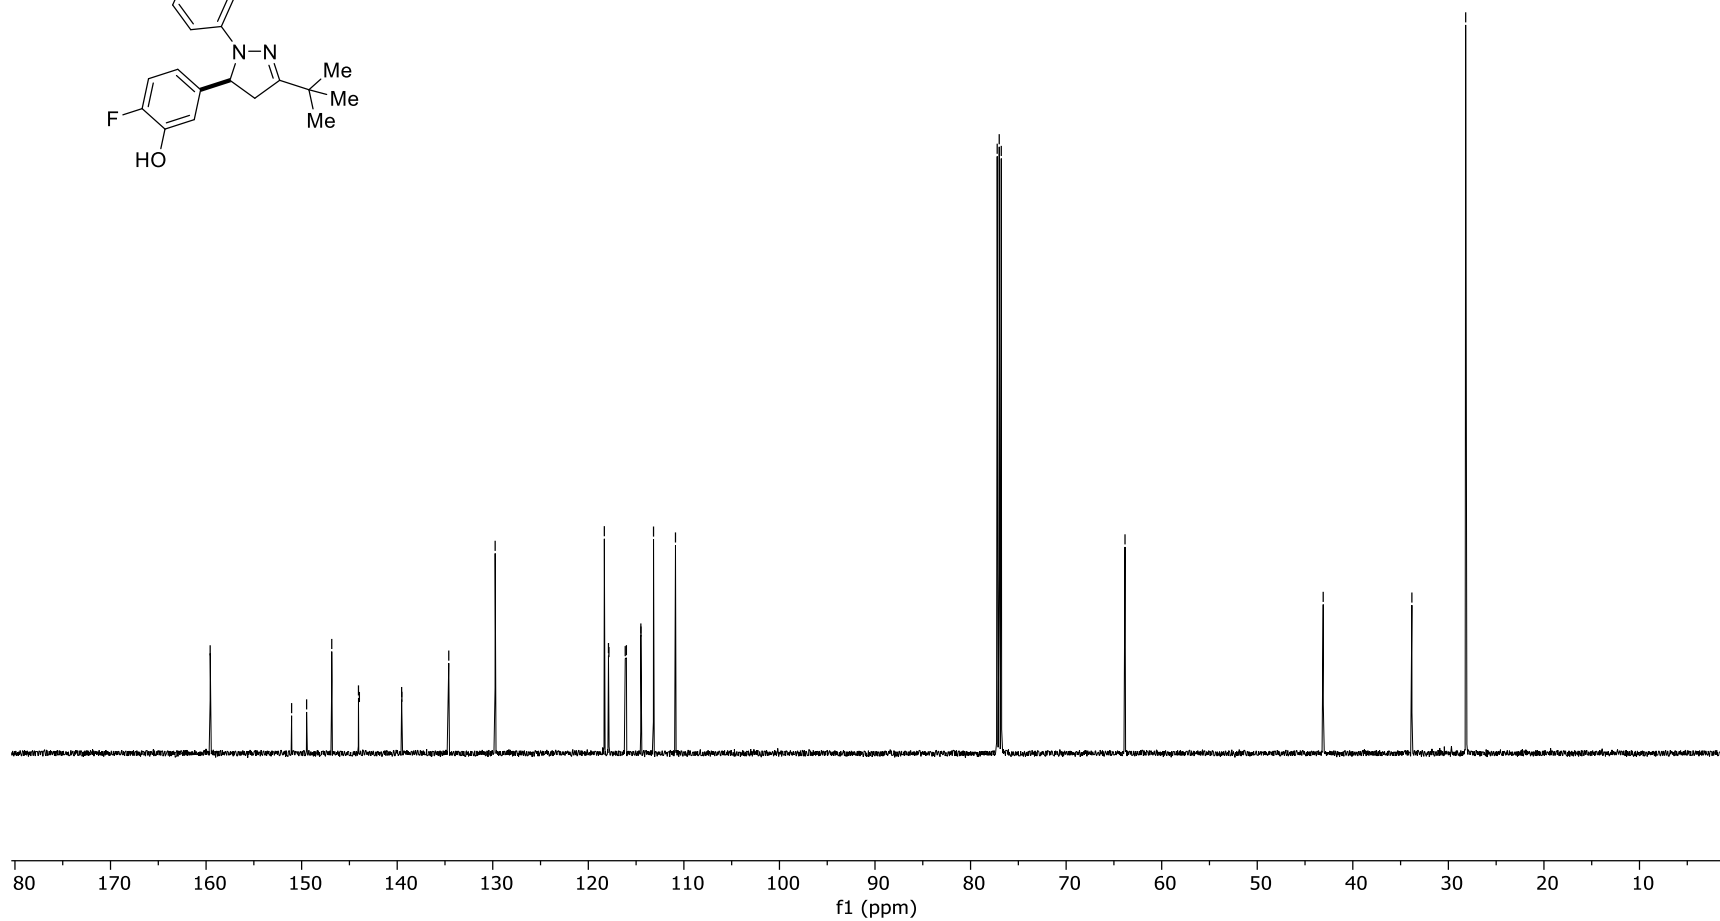

$^{19}\text{F}$ -NMR (377 MHz,  $\text{CDCl}_3$ ) of **2t**

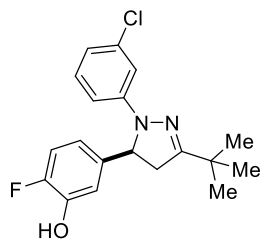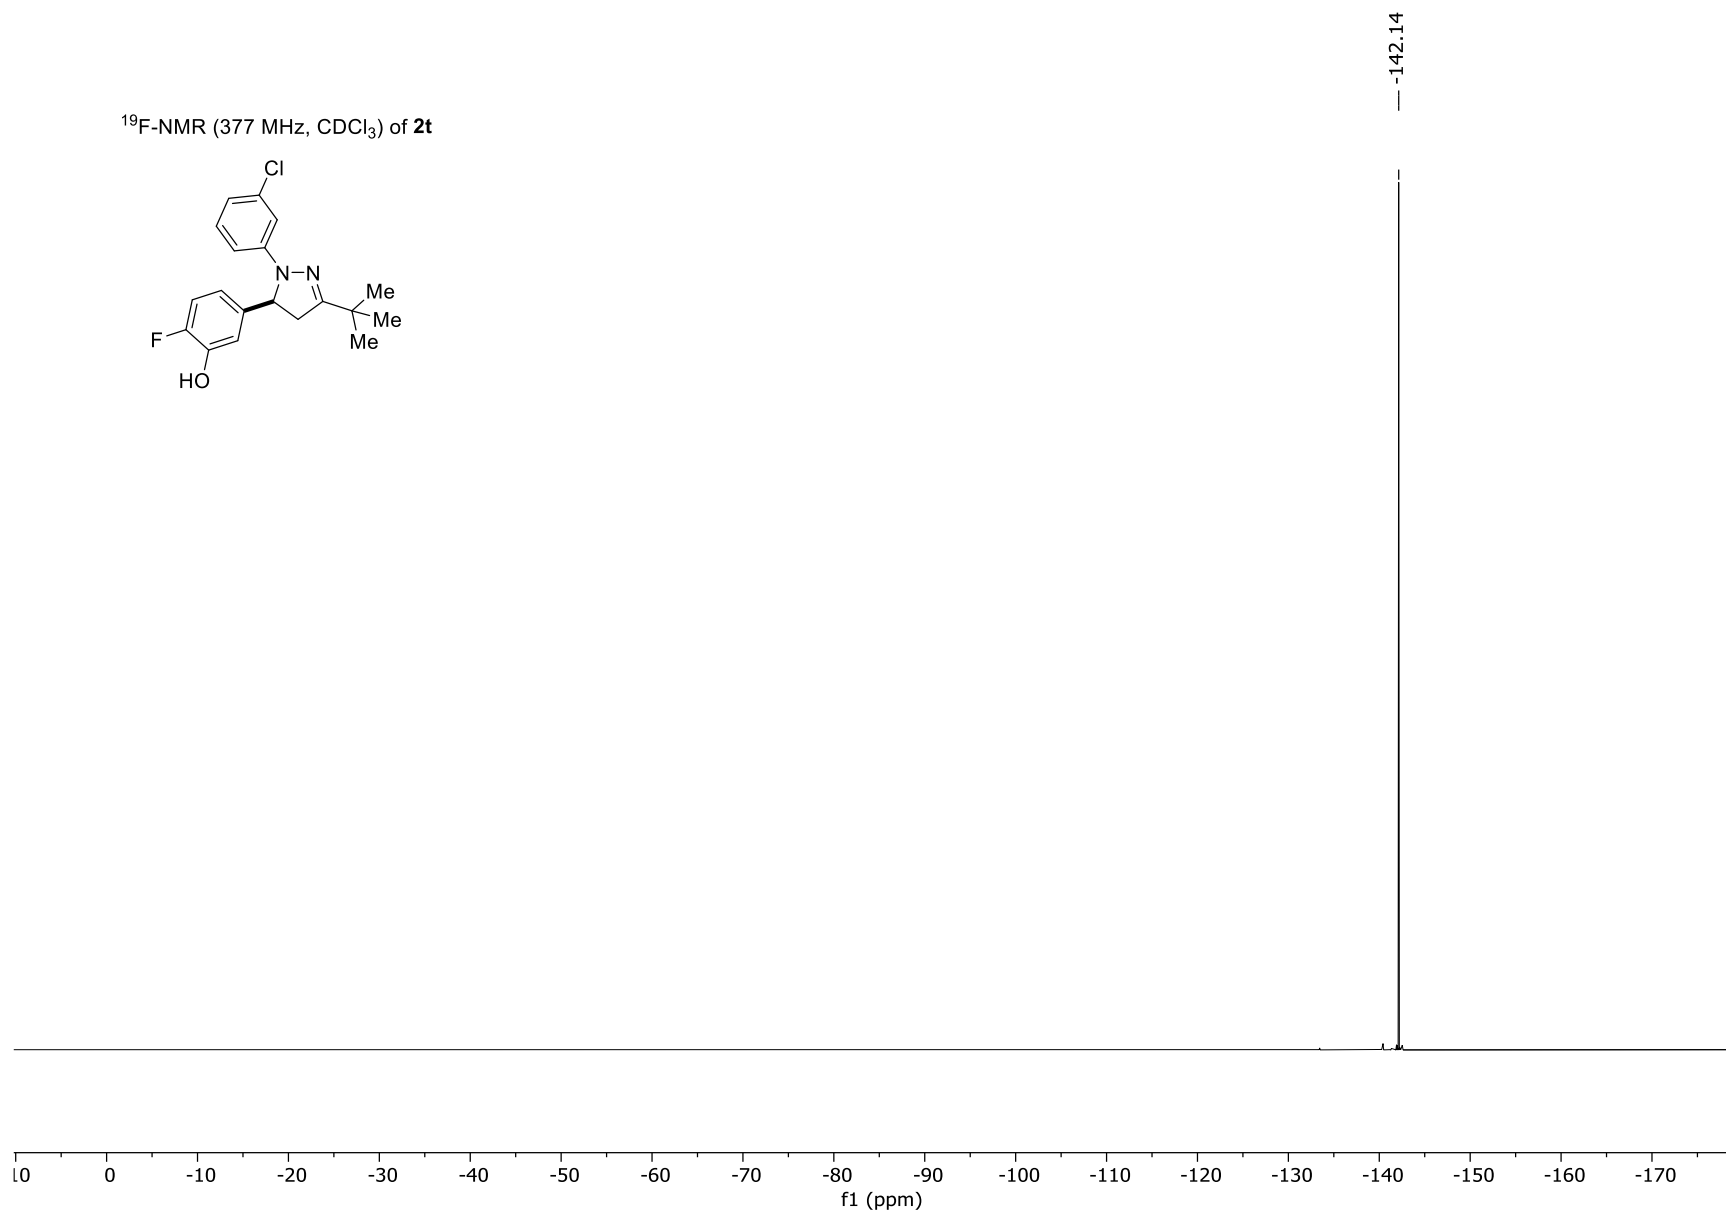

<sup>1</sup>H-NMR (400 MHz, CDCl<sub>3</sub>) of **4**

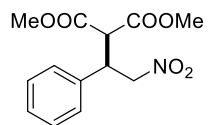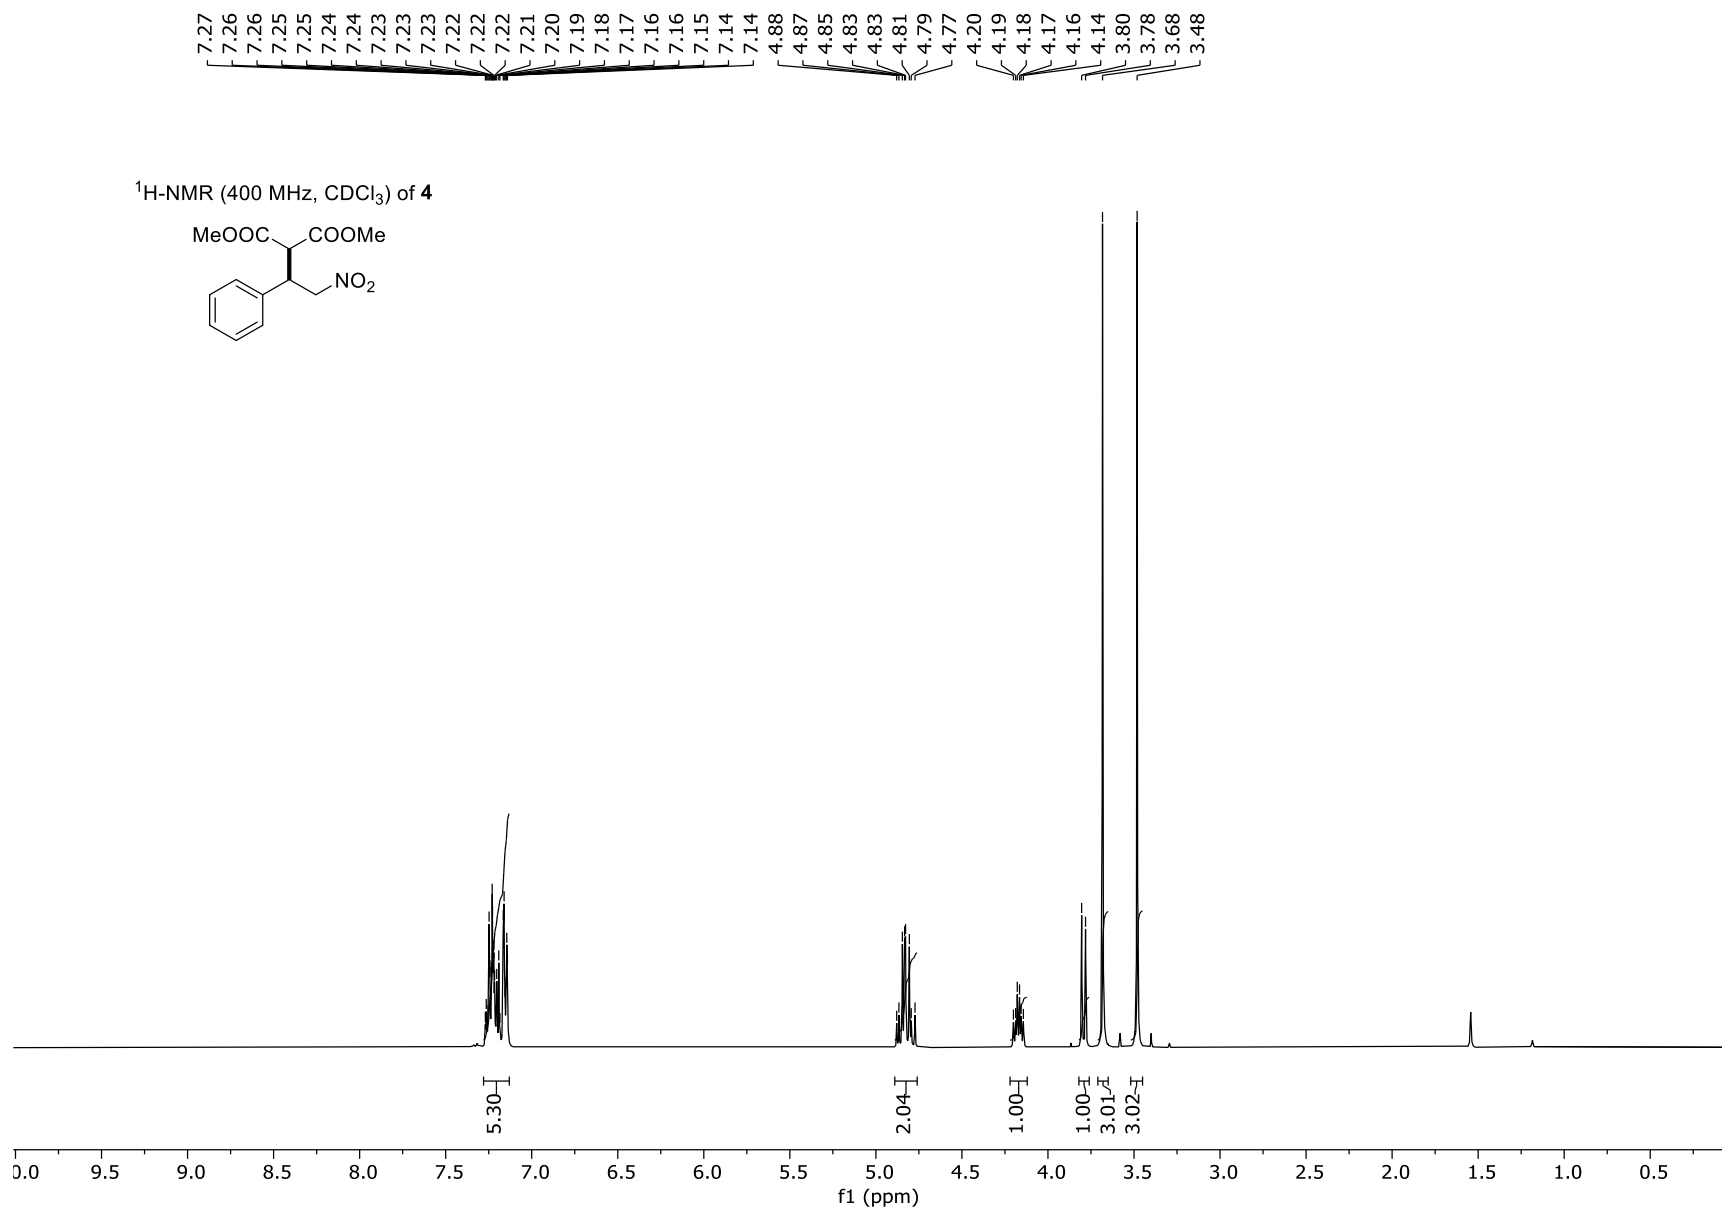

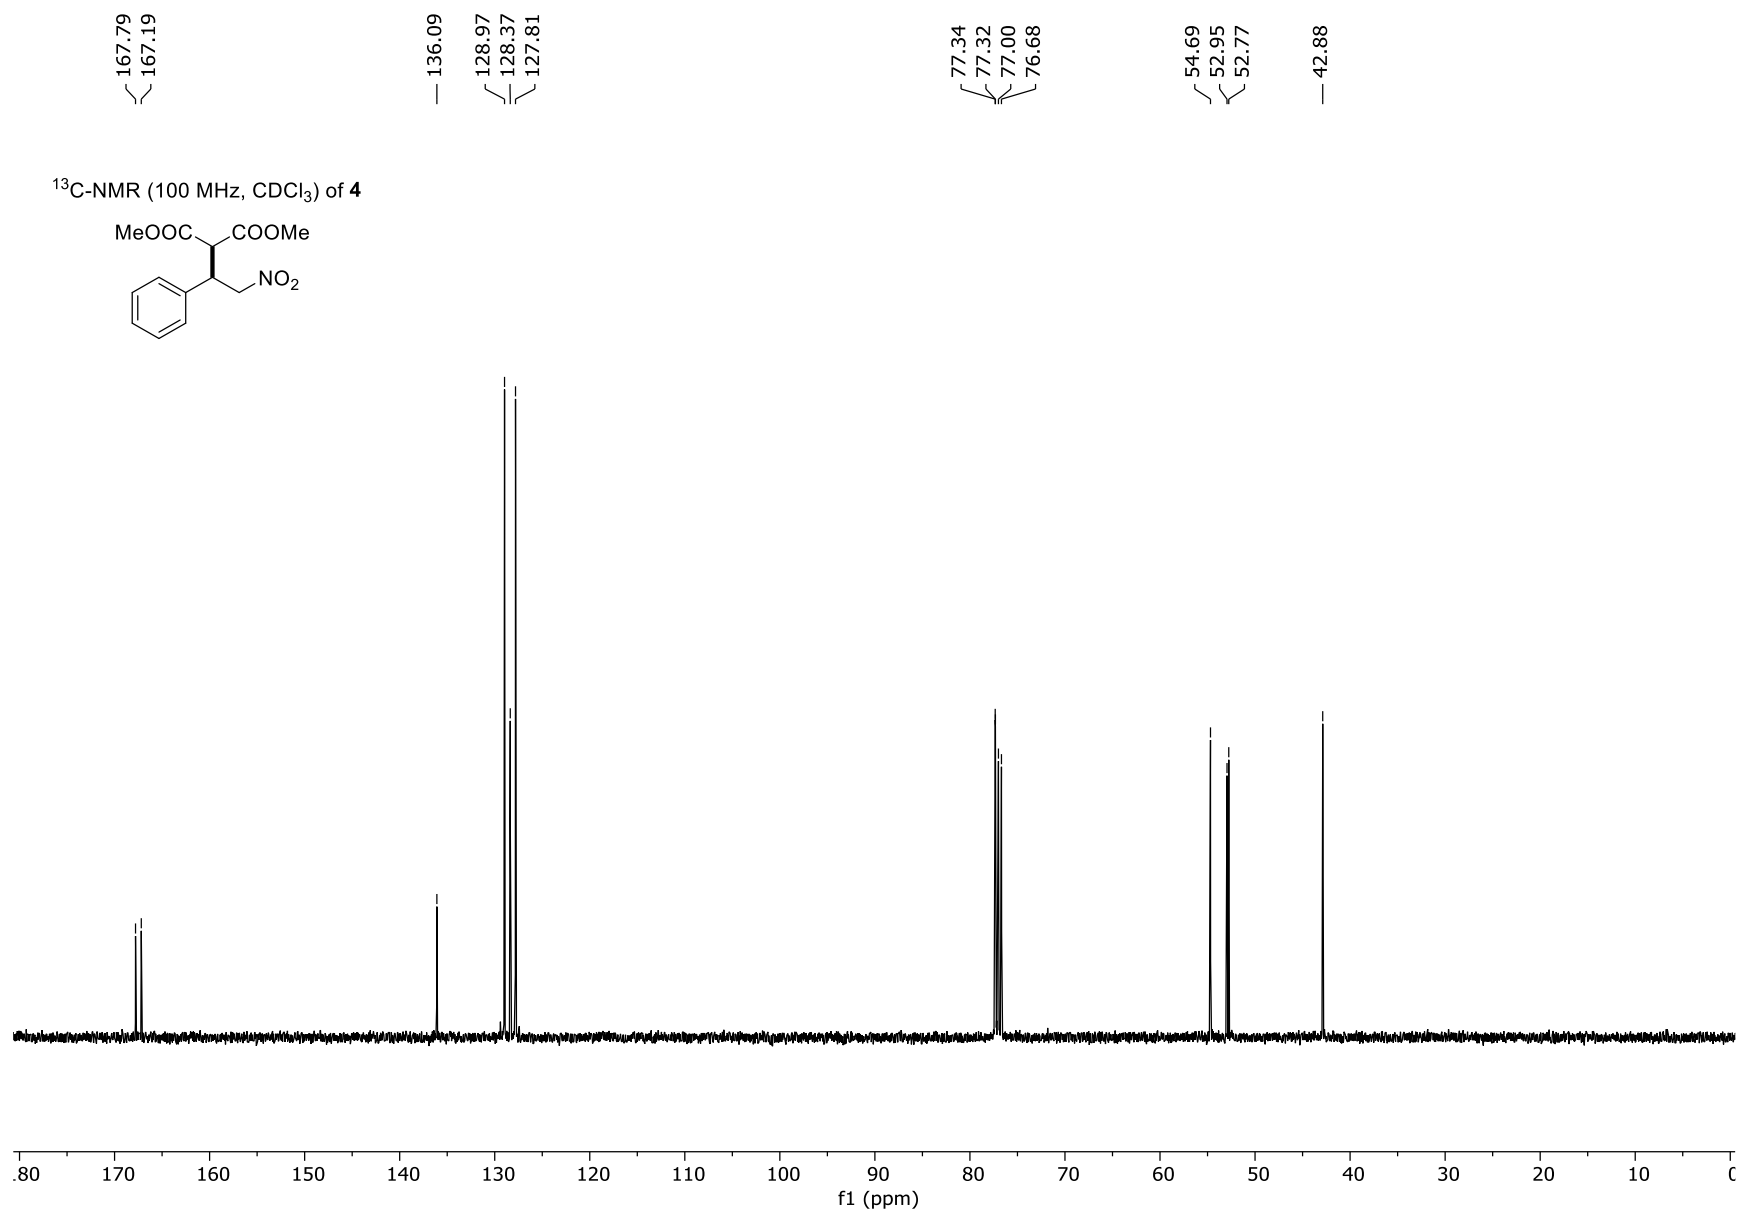

Supplement: d4sc04760e1.pdf [file d4sc04760e1.pdf]
